# Supplementary material
Source: publisher site journal article supplement (https://www.spandidos-publications.com/4737/downloadSupplementary)
Supplement: Supplementary file 1 [file downloadSupplementary]

## Sheet: 30a3b572-4742-11ec-8b50-0242ac1
Table SIII. KEGG and GO analysis of differentially-expressed genes in RIPK3 higher and RIPK3 lower groups in the TARGET datasets.
ID	description	GeneRatio	BgRatio	pValue	FDR	qvalue	geneID	size	DB	enrichmentRatio	Trend
hsa05150	Staphylococcus aureus infection	38/407	96/8093	4.71417e-25	1.2964e-22	1.01727e-22	ITGAM/HLA-DMB/HLA-DRB1/C1QA/C1QB/CFI/HLA-DPA1/HLA-DMA/C1QC/HLA-DPB1/HLA-DRB5/PTAFR/FCGR2A/FPR3/ITGB2/FCGR2B/ITGAL/FPR1/HLA-DOA/C3AR1/HLA-DRA/HLA-DQA1/SELPLG/HLA-DQB1/C5AR1/FCGR1A/FCGR3A/FCGR3B/ICAM1/C3/C4B/C2/C4A/CFB/C1R/C1S/CFH/HLA-DQA2	38	pathway_KEGG	0.0933661	Up
hsa05323	Rheumatoid arthritis	35/407	93/8093	2.80958e-22	3.86318e-20	3.03139e-20	HLA-DMB/HLA-DRB1/HLA-DPA1/HLA-DMA/TNFSF13/HLA-DPB1/HLA-DRB5/LTB/IL18/TLR4/ITGB2/ITGAL/HLA-DOA/HLA-DRA/HLA-DQA1/IL1B/HLA-DQB1/TLR2/CSF1/TNFSF13B/TEK/TNFRSF11A/CCL2/CD86/ICAM1/CXCL12/CCL3/TCIRG1/CXCL2/CCL5/FOS/HLA-DQA2/ACP5/CTSK/ATP6V0D2	35	pathway_KEGG	0.0859951	Up
hsa05140	Leishmaniasis	29/407	77/8093	1.18706e-18	1.08814e-16	8.53854e-17	NCF4/ITGAM/NCF1/HLA-DMB/HLA-DRB1/CYBB/HLA-DPA1/HLA-DMA/HLA-DPB1/HLA-DRB5/PTPN6/TLR4/FCGR2A/ITGB2/HLA-DOA/HLA-DRA/HLA-DQA1/IL1B/HLA-DQB1/TLR2/NCF2/FCGR1A/MAPK13/FCGR3A/FCGR3B/C3/CYBA/FOS/HLA-DQA2	29	pathway_KEGG	0.0712531	Up
hsa04380	Osteoclast differentiation	36/407	128/8093	4.75229e-18	3.2672e-16	2.56373e-16	NCF4/BTK/NCF1/LCP2/BLNK/LILRB2/LILRB1/FCGR2A/LILRB4/FCGR2B/CSF1R/LCK/LILRB5/TYROBP/LILRA6/SIRPA/SPI1/TREM2/IL1B/CSF1/NCF2/FCGR1A/LILRA2/MAPK13/FCGR3A/IRF9/TNFRSF11A/FCGR3B/TGFBR2/CYBA/OSCAR/SOCS3/FOS/ACP5/ITGB3/CTSK	36	pathway_KEGG	0.0884521	Up
hsa04145	Phagosome	39/407	152/8093	6.20186e-18	3.41102e-16	2.67659e-16	NCF4/CD209/CORO1A/ITGAM/NCF1/HLA-DMB/HLA-DRB1/CYBB/HLA-DPA1/HLA-DMA/CLEC7A/HLA-DPB1/HLA-DRB5/CD14/CTSS/HLA-E/TLR4/FCGR2A/ITGB2/FCGR2B/HLA-DOA/HLA-DRA/HLA-DQA1/MSR1/HLA-DQB1/TLR2/NCF2/FCGR1A/FCGR3A/FCGR3B/MARCO/C3/CYBA/TCIRG1/C1R/HLA-C/HLA-DQA2/ITGB3/ATP6V	39	pathway_KEGG	0.0958231	Up
hsa04640	Hematopoietic cell lineage	31/407	99/8093	3.57924e-17	1.64048e-15	1.28727e-15	ITGAM/HLA-DMB/HLA-DRB1/CD37/HLA-DPA1/HLA-DMA/HLA-DPB1/CD22/CD4/HLA-DRB5/CD14/CD2/CD3E/CSF1R/HLA-DOA/CSF3R/HLA-DRA/CD33/CD3D/HLA-DQA1/IL1B/CD1D/HLA-DQB1/CSF1/FCGR1A/CD34/ANPEP/CD7/CD8A/HLA-DQA2/ITGB3	31	pathway_KEGG	0.0761671	Up
hsa04514	Cell adhesion molecules	36/407	149/8093	9.91195e-16	3.89398e-14	3.05556e-14	SIGLEC1/ITGAM/HLA-DMB/HLA-DRB1/HLA-DPA1/HLA-DMA/VSIR/HLA-DPB1/CD22/CD4/HLA-DRB5/HLA-E/ITGB2/CD2/SELL/ITGAL/HLA-DOA/HLA-DRA/PTPRC/HLA-DQA1/SELPLG/HLA-DQB1/PTPRM/CD34/ESAM/F11R/CD40/CD86/ICAM1/CDH5/CD8A/VCAM1/CLDN5/HLA-C/VCAN/HLA-DQA2	36	pathway_KEGG	0.0884521	Up
hsa05152	Tuberculosis	39/407	180/8093	3.07286e-15	1.0563e-13	8.28864e-14	IL10RA/CD209/CORO1A/ITGAM/HLA-DMB/HLA-DRB1/CIITA/CD74/HLA-DPA1/HLA-DMA/CLEC7A/HLA-DPB1/HLA-DRB5/IL18/CD14/CTSS/TLR4/FCGR2A/ITGB2/FCGR2B/HLA-DOA/CARD9/HLA-DRA/ITGAX/HLA-DQA1/IL1B/FCER1G/HLA-DQB1/TLR2/FCGR1A/TLR1/MAPK13/FCGR3A/CLEC4E/FCGR3B/C3/TCIRG1/HLA-DQ	39	pathway_KEGG	0.0958231	Up
hsa04610	Complement and coagulation cascades	25/407	85/8093	2.23731e-13	6.83622e-12	5.36431e-12	ITGAM/C1QA/VSIG4/C1QB/CFI/C1QC/ITGB2/C3AR1/ITGAX/SERPINA1/C5AR1/SERPING1/F13A1/C3/C4B/C2/THBD/F3/C4A/CFB/C1R/PLAT/C1S/CFH/F5	25	pathway_KEGG	0.0614251	Up
hsa04060	Cytokine-cytokine receptor interaction	47/407	295/8093	8.48917e-13	2.33452e-11	1.83187e-11	IL10RA/CSF2RB/CCR2/TNFSF13/CD4/LTB/IL18/CX3CL1/IL17RA/TNFSF12/CSF1R/CSF3R/TNFRSF1B/IL1B/CCR5/OSM/ACVRL1/CXCL16/EBI3/CSF1/CCL4/IL2RG/TNFSF13B/TNFRSF14/CD27/CCL8/IL15RA/TNFRSF11A/CXCL10/CCL2/CD40/TGFBR2/CX3CR1/IL2RB/CXCL12/CCR1/CCL14/CCL3/IL32/CXCL2/CXCL9/L	47	pathway_KEGG	0.115479	Up
hsa05133	Pertussis	23/407	76/8093	1.07029e-12	2.67573e-11	2.09962e-11	ITGAM/IRF8/C1QA/PYCARD/C1QB/C1QC/CD14/NLRP3/TLR4/ITGB2/CASP1/IL1B/SERPING1/MAPK13/IRF1/LY96/C3/C4B/C2/C4A/C1R/C1S/FOS	23	pathway_KEGG	0.0565111	Up
hsa04658	Th1 and Th2 cell differentiation	25/407	92/8093	1.62517e-12	3.5649e-11	2.79734e-11	HLA-DMB/HLA-DRB1/HLA-DPA1/HLA-DMA/HLA-DPB1/CD4/HLA-DRB5/ZAP70/CD3E/STAT5A/LCK/HLA-DOA/HLA-DRA/JAK3/CD3D/HLA-DQA1/HLA-DQB1/CD247/IL2RG/MAPK13/LAT/JAG1/IL2RB/FOS/HLA-DQA2	25	pathway_KEGG	0.0614251	Up
hsa04061	Viral protein interaction with cytokine and cytokine receptor	26/407	100/8093	1.77024e-12	3.5649e-11	2.79734e-11	IL10RA/CCR2/IL18/CX3CL1/CSF1R/TNFRSF1B/CCR5/CSF1/CCL4/IL2RG/TNFRSF14/CCL8/CXCL10/CCL2/CX3CR1/IL2RB/CXCL12/CCR1/CCL14/CCL3/CXCL2/CXCL9/CCL5/TNFSF10/CXCL11/CCL18	26	pathway_KEGG	0.0638821	Up
hsa04659	Th17 cell differentiation	27/407	108/8093	1.81486e-12	3.5649e-11	2.79734e-11	HLA-DMB/HLA-DRB1/HLA-DPA1/HLA-DMA/HLA-DPB1/CD4/HLA-DRB5/ZAP70/CD3E/STAT5A/LCK/HLA-DOA/HLA-DRA/JAK3/CD3D/HLA-DQA1/IL1B/HLA-DQB1/EBI3/CD247/IL2RG/MAPK13/LAT/TGFBR2/IL2RB/FOS/HLA-DQA2	27	pathway_KEGG	0.0663391	Up
hsa05416	Viral myocarditis	20/407	60/8093	4.40981e-12	8.08466e-11	6.34394e-11	HLA-DMB/HLA-DRB1/HLA-DPA1/HLA-DMA/HLA-DPB1/HLA-DRB5/HLA-E/ITGB2/ITGAL/HLA-DOA/HLA-DRA/HLA-DQA1/HLA-DQB1/RAC2/CD40/CD86/ICAM1/PRF1/HLA-C/HLA-DQA2	20	pathway_KEGG	0.04914	Up
hsa05330	Allograft rejection	16/407	38/8093	1.00543e-11	1.72808e-10	1.356e-10	HLA-DMB/HLA-DRB1/HLA-DPA1/HLA-DMA/HLA-DPB1/HLA-DRB5/HLA-E/HLA-DOA/HLA-DRA/HLA-DQA1/HLA-DQB1/CD40/CD86/PRF1/HLA-C/HLA-DQA2	16	pathway_KEGG	0.039312	Up
hsa05332	Graft-versus-host disease	16/407	42/8093	6.24832e-11	9.82484e-10	7.70944e-10	HLA-DMB/HLA-DRB1/HLA-DPA1/HLA-DMA/HLA-DPB1/HLA-DRB5/HLA-E/HLA-DOA/HLA-DRA/HLA-DQA1/IL1B/HLA-DQB1/CD86/PRF1/HLA-C/HLA-DQA2	16	pathway_KEGG	0.039312	Up
hsa05310	Asthma	14/407	31/8093	6.4308e-11	9.82484e-10	7.70944e-10	HLA-DMB/HLA-DRB1/HLA-DPA1/HLA-DMA/HLA-DPB1/HLA-DRB5/HLA-DOA/HLA-DRA/HLA-DQA1/FCER1A/FCER1G/HLA-DQB1/CD40/HLA-DQA2	14	pathway_KEGG	0.034398	Up
hsa04062	Chemokine signaling pathway	34/407	192/8093	7.96214e-11	1.15242e-09	9.04287e-10	DOCK2/PLCB2/WAS/CCR2/NCF1/VAV1/PRKCD/CX3CL1/PTK2B/HCK/PIK3R5/FGR/ARRB2/JAK3/ADCY4/CCR5/CXCL16/CCL4/RAC2/CCL8/CXCL10/CCL2/CX3CR1/CXCL12/CCR1/GNG2/CCL14/CCL3/CXCL2/CXCL9/CCL5/CXCL11/CCL18/RASGRP2	34	pathway_KEGG	0.0835381	Up
hsa04672	Intestinal immune network for IgA production	17/407	49/8093	8.91124e-11	1.2253e-09	9.61476e-10	HLA-DMB/HLA-DRB1/HLA-DPA1/HLA-DMA/TNFSF13/HLA-DPB1/HLA-DRB5/HLA-DOA/HLA-DRA/HLA-DQA1/HLA-DQB1/TNFSF13B/IL15RA/CD40/CD86/CXCL12/HLA-DQA2	17	pathway_KEGG	0.041769	Up
hsa04940	Type I diabetes mellitus	16/407	43/8093	9.49836e-11	1.24383e-09	9.76022e-10	HLA-DMB/HLA-DRB1/HLA-DPA1/HLA-DMA/HLA-DPB1/HLA-DRB5/HLA-E/HLA-DOA/HLA-DRA/HLA-DQA1/IL1B/HLA-DQB1/CD86/PRF1/HLA-C/HLA-DQA2	16	pathway_KEGG	0.039312	Up
hsa04612	Antigen processing and presentation	20/407	78/8093	8.98442e-10	1.12305e-08	8.81247e-09	HLA-DMB/HLA-DRB1/CIITA/CD74/HLA-DPA1/HLA-DMA/HLA-DPB1/CD4/HLA-DRB5/CTSS/HLA-E/HLA-DOA/HLA-DRA/HLA-DQA1/HLA-DQB1/IFI30/CD8A/HLA-C/HSPA2/HLA-DQA2	20	pathway_KEGG	0.04914	Up
hsa05164	Influenza A	30/407	172/8093	1.5801e-09	1.88925e-08	1.48248e-08	HLA-DMB/HLA-DRB1/CIITA/PYCARD/HLA-DPA1/HLA-DMA/HLA-DPB1/HLA-DRB5/IL18/NLRP3/TLR4/HLA-DOA/CASP1/HLA-DRA/HLA-DQA1/TPSAB1/IL1B/HLA-DQB1/TPSB2/IRF9/CXCL10/CCL2/ICAM1/OAS1/IRF7/SOCS3/CCL5/TNFSF10/MX1/HLA-DQA2	30	pathway_KEGG	0.0737101	Up
hsa05340	Primary immunodeficiency	14/407	38/8093	1.69507e-09	1.94226e-08	1.52407e-08	BTK/CIITA/BLNK/CD4/ZAP70/CD3E/LCK/JAK3/PTPRC/CD3D/IL2RG/CD79A/CD40/CD8A	14	pathway_KEGG	0.034398	Up
hsa05322	Systemic lupus erythematosus	26/407	136/8093	2.68812e-09	2.95694e-08	2.32027e-08	HLA-DMB/HLA-DRB1/C1QA/C1QB/HLA-DPA1/HLA-DMA/C1QC/HLA-DPB1/HLA-DRB5/FCGR2A/HLA-DOA/HLA-DRA/HLA-DQA1/HLA-DQB1/FCGR1A/FCGR3A/CD40/CD86/FCGR3B/C3/C4B/C2/C4A/C1R/C1S/HLA-DQA2	26	pathway_KEGG	0.0638821	Up
hsa05320	Autoimmune thyroid disease	16/407	53/8093	3.33861e-09	3.53122e-08	2.77091e-08	HLA-DMB/HLA-DRB1/HLA-DPA1/HLA-DMA/HLA-DPB1/HLA-DRB5/HLA-E/HLA-DOA/HLA-DRA/HLA-DQA1/HLA-DQB1/CD40/CD86/PRF1/HLA-C/HLA-DQA2	16	pathway_KEGG	0.039312	Up
hsa05144	Malaria	15/407	50/8093	1.1485e-08	1.16976e-07	9.17901e-08	IL18/TLR4/ITGB2/ITGAL/IL1B/TLR2/HBA2/HBB/CCL2/HBA1/CD40/ICAM1/GYPC/VCAM1/HGF	15	pathway_KEGG	0.036855	Up
hsa05321	Inflammatory bowel disease	17/407	65/8093	1.21525e-08	1.19355e-07	9.36563e-08	HLA-DMB/HLA-DRB1/HLA-DPA1/HLA-DMA/HLA-DPB1/HLA-DRB5/IL18/TLR4/HLA-DOA/HLA-DRA/HLA-DQA1/IL1B/HLA-DQB1/TLR2/IL2RG/TLR5/HLA-DQA2	17	pathway_KEGG	0.041769	Up
hsa05145	Toxoplasmosis	22/407	112/8093	2.75537e-08	2.61285e-07	2.05028e-07	IL10RA/ALOX5/HLA-DMB/HLA-DRB1/CIITA/HLA-DPA1/HLA-DMA/HLA-DPB1/HLA-DRB5/TLR4/PIK3R5/HLA-DOA/HLA-DRA/HLA-DQA1/CCR5/HLA-DQB1/TLR2/MAPK13/LY96/CD40/HSPA2/HLA-DQA2	22	pathway_KEGG	0.0540541	Up
hsa04620	Toll-like receptor signaling pathway	21/407	104/8093	3.45378e-08	3.16597e-07	2.4843e-07	IRF5/CD14/TLR4/IL1B/TLR2/CCL4/TLR1/MAPK13/TLR5/CXCL10/LY96/CD40/CD86/CCL3/IRF7/SPP1/CXCL9/CCL5/CXCL11/FOS/CTSK	21	pathway_KEGG	0.0515971	Up
hsa04670	Leukocyte transendothelial migration	22/407	114/8093	3.86135e-08	3.42539e-07	2.68787e-07	NCF4/ITGAM/NCF1/CYBB/VAV1/PTK2B/ITGB2/RASSF5/ITGAL/NCF2/RAPGEF3/MAPK13/RAC2/ESAM/F11R/ICAM1/CDH5/CXCL12/CYBA/VCAM1/MYL9/CLDN5	22	pathway_KEGG	0.0540541	Up
hsa05166	Human T-cell leukemia virus 1 infection	32/407	222/8093	5.49908e-08	4.72577e-07	3.70826e-07	HLA-DMB/HLA-DRB1/HLA-DPA1/HLA-DMA/HLA-DPB1/CD4/HLA-DRB5/HLA-E/ITGB2/CD3E/STAT5A/LCK/ITGAL/HLA-DOA/HLA-DRA/JAK3/SPI1/CD3D/ADCY4/HLA-DQA1/HLA-DQB1/IL2RG/IL15RA/CD40/TGFBR2/ICAM1/IL2RB/ZFP36/HLA-C/FOS/HLA-DQA2/EGR1	32	pathway_KEGG	0.0786241	Up
hsa04650	Natural killer cell mediated cytotoxicity	23/407	131/8093	1.1863e-07	9.8858e-07	7.75728e-07	LCP2/VAV1/PTK2B/HLA-E/PTPN6/ZAP70/ITGB2/LCK/ITGAL/TYROBP/HCST/SH3BP2/FCER1G/CD247/CD48/FCGR3A/RAC2/LAT/FCGR3B/ICAM1/PRF1/HLA-C/TNFSF10	23	pathway_KEGG	0.0565111	Up
hsa04613	Neutrophil extracellular trap formation	28/407	190/8093	2.40103e-07	1.94201e-06	1.52388e-06	PLCB2/NCF4/ITGAM/NCF1/SIGLEC9/CYBB/CLEC7A/HDAC10/TLR4/FCGR2A/FPR3/ITGB2/ITGAL/FPR1/CASP1/SELPLG/TLR2/NCF2/C5AR1/FCGR1A/MAPK13/FCGR3A/RAC2/FCGR3B/GSDMD/C3/CYBA/ITGB3	28	pathway_KEGG	0.0687961	Up
hsa05169	Epstein-Barr virus infection	29/407	202/8093	2.58048e-07	2.02752e-06	1.59097e-06	BTK/HLA-DMB/HLA-DRB1/HLA-DPA1/BLNK/HLA-DMA/HLA-DPB1/HLA-DRB5/HLA-E/ENTPD1/CD3E/ITGAL/HLA-DOA/HLA-DRA/JAK3/CD3D/HLA-DQA1/HLA-DQB1/TLR2/CD247/MAPK13/IRF9/CXCL10/CD40/ICAM1/OAS1/IRF7/HLA-C/HLA-DQA2	29	pathway_KEGG	0.0712531	Up
hsa05417	Lipid and atherosclerosis	30/407	215/8093	3.0106e-07	2.29976e-06	1.8046e-06	PLCB2/NCF4/NCF1/PYCARD/CYBB/VAV1/IL18/CD14/NLRP3/TLR4/CASP1/ABCG1/IL1B/TLR2/NCF2/MAPK13/CCL2/LY96/CD40/POU2F2/ICAM1/CYBA/CCL3/IRF7/VCAM1/CXCL2/CCL5/TNFSF10/FOS/HSPA2	30	pathway_KEGG	0.0737101	Up
hsa04621	NOD-like receptor signaling pathway	27/407	184/8093	4.32555e-07	3.21493e-06	2.52272e-06	RIPK3/PLCB2/TRPM2/PYCARD/CYBB/PRKCD/IL18/NLRP3/TLR4/CASP1/CARD9/IL1B/NAIP/PSTPIP1/MAPK13/IRF9/TRPV2/CCL2/GSDMD/CYBA/OAS1/NLRP1/IRF7/GBP4/CXCL2/CCL5/GBP1	27	pathway_KEGG	0.0663391	Up
hsa04662	B cell receptor signaling pathway	17/407	82/8093	4.77927e-07	3.45868e-06	2.71399e-06	BTK/BLNK/LILRB2/CD22/VAV1/LILRB1/INPP5D/PTPN6/LILRB4/FCGR2B/PIK3AP1/LILRB5/LILRA6/LILRA2/CD79A/RAC2/FOS	17	pathway_KEGG	0.041769	Up
hsa05134	Legionellosis	14/407	57/8093	5.59879e-07	3.94786e-06	3.09784e-06	ITGAM/PYCARD/IL18/CD14/TLR4/ITGB2/CASP1/IL1B/NAIP/TLR2/TLR5/C3/CXCL2/HSPA2	14	pathway_KEGG	0.034398	Up
hsa05142	Chagas disease	19/407	102/8093	5.89942e-07	4.05585e-06	3.18258e-06	PLCB2/C1QA/C1QB/C1QC/TLR4/CD3E/CD3D/GNA15/CFLAR/IL1B/TLR2/CD247/MAPK13/CCL2/TGFBR2/C3/CCL3/CCL5/FOS	19	pathway_KEGG	0.046683	Up
hsa04064	NF-kappa B signaling pathway	19/407	104/8093	8.063e-07	5.40811e-06	4.24368e-06	BTK/BLNK/LTB/CD14/TLR4/ZAP70/LCK/CFLAR/IL1B/CCL4/TNFSF13B/TNFRSF11A/LAT/LY96/CD40/ICAM1/CXCL12/VCAM1/CXCL2	19	pathway_KEGG	0.046683	Up
hsa05135	Yersinia infection	22/407	137/8093	1.1048e-06	7.2338e-06	5.67628e-06	WAS/LCP2/PYCARD/CD4/VAV1/IL18/PTK2B/NLRP3/TLR4/ZAP70/FCGR2A/LCK/CASP1/IL1B/FYB1/ARPC1B/MAPK13/RAC2/LAT/CCL2/CD8A/FOS	22	pathway_KEGG	0.0540541	Up
hsa04666	Fc gamma R-mediated phagocytosis	17/407	97/8093	5.55094e-06	3.55002e-05	2.78566e-05	WAS/NCF1/VAV1/PRKCD/INPP5D/FCGR2A/HCK/FCGR2B/PTPRC/PLA2G6/FCGR1A/ARPC1B/FCGR3A/RAC2/LAT/FCGR3B/SCIN	17	pathway_KEGG	0.041769	Up
hsa04668	TNF signaling pathway	18/407	112/8093	1.04361e-05	6.52255e-05	5.11817e-05	RIPK3/CX3CL1/TNFRSF1B/CFLAR/IL1B/CSF1/MAPK13/IRF1/CXCL10/CCL2/JAG1/ICAM1/SOCS3/VCAM1/CXCL2/LIF/CCL5/FOS	18	pathway_KEGG	0.044226	Up
hsa05171	Coronavirus disease - COVID-19	27/407	232/8093	3.68811e-05	0.000225385	0.000176857	C1QA/C1QB/CYBB/C1QC/NLRP3/TLR4/FCGR2A/C3AR1/CASP1/IL1B/TLR2/C5AR1/MAPK13/F13A1/IRF9/CXCL10/CCL2/C3/C4B/C2/OAS1/C4A/CFB/C1R/C1S/MX1/FOS	27	pathway_KEGG	0.0663391	Up
hsa05143	African trypanosomiasis	9/407	37/8093	6.65701e-05	0.000397973	0.000312285	PLCB2/IL18/IL1B/HBA2/HBB/HBA1/ICAM1/APOL1/VCAM1	9	pathway_KEGG	0.022113	Up
hsa05235	PD-L1 expression and PD-1 checkpoint pathway in cancer	14/407	89/8093	0.000127112	0.00073308	0.00057524	CD4/PTPN6/TLR4/ZAP70/CD3E/LCK/CD3D/TLR2/CD247/BATF3/MAPK13/LAT/BATF/FOS	14	pathway_KEGG	0.034398	Up
hsa04933	AGE-RAGE signaling pathway in diabetic complications	15/407	100/8093	0.000127956	0.00073308	0.00057524	PLCB2/CYBB/PRKCD/STAT5A/IL1B/MAPK13/CCL2/TGFBR2/ICAM1/COL4A2/THBD/F3/VCAM1/EGR1/AGT	15	pathway_KEGG	0.036855	Up
hsa04015	Rap1 signaling pathway	24/407	210/8093	0.00013277	0.000745139	0.000584703	PLCB2/ITGAM/LCP2/VAV1/ITGB2/RASSF5/CSF1R/ITGAL/FPR1/ADCY4/LPAR5/FYB1/CSF1/PDGFB/RAPGEF3/MAPK13/TEK/APBB1IP/RAC2/ARAP3/LAT/HGF/RASGRP2/ITGB3	24	pathway_KEGG	0.0589681	Up
hsa05418	Fluid shear stress and atherosclerosis	18/407	139/8093	0.000194998	0.00107249	0.000841572	NCF1/IL1B/NCF2/PDGFB/MAPK13/RAC2/HMOX1/CCL2/ICAM1/CDH5/CYBA/THBD/VCAM1/GSTM2/PLAT/FOS/GSTM5/ITGB3	18	pathway_KEGG	0.044226	Up
hsa04142	Lysosome	17/407	128/8093	0.000214764	0.00115804	0.000908701	CTSS/FUCA1/HYAL2/IDUA/ARSA/LAPTM5/NPC2/CD68/PSAP/GAA/SLC11A1/CTSZ/TCIRG1/HYAL1/ACP5/CTSK/ATP6V0D2	17	pathway_KEGG	0.041769	Up
hsa05130	Pathogenic Escherichia coli infection	22/407	197/8093	0.000349406	0.00184782	0.00144997	MYO1F/HCLS1/MYO1G/PYCARD/CYTH4/IL18/PTPN6/NLRP3/TLR4/FCGR2A/CASP1/NCKAP1L/LPAR5/IL1B/NAIP/ARPC1B/MAPK13/TLR5/MYH11/CLDN5/TNFSF10/FOS	22	pathway_KEGG	0.0540541	Up
hsa04664	Fc epsilon RI signaling pathway	11/407	68/8093	0.00052062	0.00270133	0.0021197	ALOX5/BTK/LCP2/VAV1/INPP5D/ALOX5AP/FCER1A/FCER1G/MAPK13/RAC2/LAT	11	pathway_KEGG	0.027027	Up
hsa05162	Measles	17/407	139/8093	0.000575139	0.00292895	0.00229831	CD209/TLR4/FCGR2B/CD3E/STAT5A/JAK3/CD3D/IL1B/TLR2/IL2RG/IRF9/IL2RB/OAS1/IRF7/MX1/FOS/HSPA2	17	pathway_KEGG	0.041769	Up
hsa04660	T cell receptor signaling pathway	14/407	104/8093	0.000665685	0.00332842	0.00261178	LCP2/CD4/VAV1/PTPN6/ZAP70/CD3E/LCK/PTPRC/CD3D/CD247/MAPK13/LAT/CD8A/FOS	14	pathway_KEGG	0.034398	Up
hsa04625	C-type lectin receptor signaling pathway	13/407	104/8093	0.00204564	0.0100455	0.00788262	CD209/PYCARD/CLEC7A/PRKCD/NLRP3/CASP1/CARD9/IL1B/FCER1G/MAPK13/CLEC4E/IRF1/IRF9	13	pathway_KEGG	0.031941	Up
hsa00590	Arachidonic acid metabolism	9/407	61/8093	0.00318731	0.0153774	0.0120664	ALOX5/PTGS1/HPGDS/LTC4S/PLA2G6/GGT5/GPX1/PLA2G5/GPX3	9	pathway_KEGG	0.022113	Up
hsa04611	Platelet activation	14/407	124/8093	0.00365528	0.0173311	0.0135995	PLCB2/BTK/LCP2/PTGS1/FCGR2A/PIK3R5/FERMT3/VAMP8/ADCY4/FCER1G/MAPK13/APBB1IP/RASGRP2/ITGB3	14	pathway_KEGG	0.034398	Up
hsa04623	Cytosolic DNA-sensing pathway	9/407	63/8093	0.00398192	0.0185598	0.0145637	RIPK3/PYCARD/IL18/CASP1/IL1B/CCL4/CXCL10/IRF7/CCL5	9	pathway_KEGG	0.022113	Up
hsa05132	Salmonella infection	22/407	249/8093	0.00703008	0.0322212	0.0252836	RIPK3/PYCARD/CYTH4/IL18/CD14/NLRP3/TLR4/CASP1/NCKAP1L/PTPRC/IL1B/NAIP/TLR2/ARPC1B/MAPK13/TLR5/LY96/GSDMD/PODXL/MYL9/TNFSF10/FOS	22	pathway_KEGG	0.0540541	Up
hsa00480	Glutathione metabolism	8/407	58/8093	0.00803591	0.0362275	0.0284273	HPGDS/GGT7/ANPEP/GGT5/GPX1/GSTM2/GSTM5/GPX3	8	pathway_KEGG	0.019656	Up
hsa05167	Kaposi sarcoma-associated herpesvirus infection	18/407	194/8093	0.00872117	0.0386826	0.0303538	HLA-E/HCK/PIK3R5/CCR5/PDGFB/MAPK13/IRF9/CD86/ICAM1/CCR1/C3/GNG2/IRF7/CLEC2B/ZFP36/CXCL2/HLA-C/FOS	18	pathway_KEGG	0.044226	Up
hsa05146	Amoebiasis	11/407	102/8093	0.0131588	0.0574393	0.045072	PLCB2/ITGAM/CD14/TLR4/ITGB2/GNA15/IL1B/CD1D/TLR2/COL4A2/CXCL2	11	pathway_KEGG	0.027027	Up
hsa00430	Taurine and hypotaurine metabolism	3/407	11/8093	0.0153981	0.0661638	0.051918	GGT7/CSAD/GGT5	3	pathway_KEGG	0.00737101	Up
hsa05163	Human cytomegalovirus infection	19/407	225/8093	0.0183189	0.0775031	0.0608158	IL10RA/PLCB2/CX3CL1/PTK2B/HLA-E/ADCY4/IL1B/CCR5/CCL4/MAPK13/RAC2/CCL2/CXCL12/CCR1/GNG2/CCL3/CCL5/HLA-C/ITGB3	19	pathway_KEGG	0.046683	Up
hsa04630	JAK-STAT signaling pathway	14/407	162/8093	0.0332742	0.138642	0.108791	IL10RA/CSF2RB/PTPN6/STAT5A/CSF3R/JAK3/OSM/IL2RG/PDGFB/IL15RA/IRF9/IL2RB/SOCS3/LIF	14	pathway_KEGG	0.034398	Up
hsa04270	Vascular smooth muscle contraction	12/407	133/8093	0.0351681	0.144347	0.113267	PLCB2/PRKCD/RAMP3/ADCY4/PLA2G6/PRKCH/MYH11/RAMP2/PLA2G5/MYL9/ACTA2/AGT	12	pathway_KEGG	0.029484	Up
hsa05170	Human immunodeficiency virus 1 infection	17/407	212/8093	0.0381419	0.154251	0.121039	CD4/PTK2B/HLA-E/TLR4/CD3E/CD3D/TNFRSF1B/CCR5/TLR2/CD247/MAPK13/SAMHD1/RAC2/GNG2/BST2/HLA-C/FOS	17	pathway_KEGG	0.041769	Up
hsa05131	Shigellosis	19/407	247/8093	0.0423927	0.168956	0.132578	PLCB2/HCLS1/PYCARD/CYTH4/PRKCD/IL18/CD14/NLRP3/TLR4/CASP1/IL1B/NAIP/HK3/ARPC1B/MAPK13/TLR5/C3/MYL9/CCL5	19	pathway_KEGG	0.046683	Up
hsa04657	IL-17 signaling pathway	9/407	94/8093	0.0461536	0.181318	0.142278	IL17RA/S100A9/IL1B/MAPK13/CXCL10/CCL2/S100A8/CXCL2/FOS	9	pathway_KEGG	0.022113	Up
hsa05221	Acute myeloid leukemia	7/407	67/8093	0.0502295	0.194551	0.152662	ITGAM/CD14/CSF1R/STAT5A/SPI1/FCGR1A/CEBPA	7	pathway_KEGG	0.017199	Up
hsa04216	Ferroptosis	5/407	41/8093	0.0531533	0.203016	0.159304	CYBB/ACSL5/SAT1/HMOX1/SLC40A1	5	pathway_KEGG	0.012285	Up
hsa05202	Transcriptional misregulation in cancer	15/407	192/8093	0.0594802	0.224069	0.175825	ITGAM/LYL1/CD14/LMO2/CSF1R/SPI1/HHEX/FCGR1A/CEBPA/CD40/CD86/SLC45A3/TGFBR2/IL2RB/PLAT	15	pathway_KEGG	0.036855	Up
hsa04917	Prolactin signaling pathway	7/407	70/8093	0.0610437	0.226852	0.178008	STAT5A/MAPK13/IRF1/TNFRSF11A/GALT/SOCS3/FOS	7	pathway_KEGG	0.017199	Up
hsa00531	Glycosaminoglycan degradation	3/407	19/8093	0.0672601	0.24662	0.19352	HYAL2/IDUA/HYAL1	3	pathway_KEGG	0.00737101	Up
hsa04072	Phospholipase D signaling pathway	12/407	148/8093	0.0689093	0.249343	0.195657	PLCB2/CYTH4/PTK2B/PIK3R5/ADCY4/FCER1A/LPAR5/FCER1G/PDGFB/RAPGEF3/LPAR6/AGT	12	pathway_KEGG	0.029484	Up
hsa04014	Ras signaling pathway	17/407	232/8093	0.0758682	0.270958	0.212618	RASAL3/RASA4B/RASGRP4/ZAP70/RASSF5/CSF1R/CSF1/PLA2G6/PDGFB/TEK/RAC2/RASA4/LAT/GNG2/PLA2G5/HGF/RASGRP2	17	pathway_KEGG	0.041769	Up
hsa04810	Regulation of actin cytoskeleton	16/407	218/8093	0.0823263	0.290253	0.227758	ITGAM/VAV1/ITGB2/ITGAL/NCKAP1L/ITGAX/LPAR5/PDGFB/ARPC1B/RAC2/MYH11/CXCL12/MYL9/ITGA11/SCIN/ITGB3	16	pathway_KEGG	0.039312	Up
hsa04371	Apelin signaling pathway	11/407	138/8093	0.0870474	0.303013	0.237771	PLCB2/PIK3R5/APLNR/ADCY4/JAG1/GNG2/SPP1/ACTA2/PLAT/CCN2/EGR1	11	pathway_KEGG	0.027027	Up
hsa04217	Necroptosis	12/407	159/8093	0.103887	0.356157	0.279472	RIPK3/PYCARD/CYBB/NLRP3/TLR4/STAT5A/CASP1/JAK3/CFLAR/IL1B/IRF9/TNFSF10	12	pathway_KEGG	0.029484	Up
hsa04979	Cholesterol metabolism	5/407	50/8093	0.104904	0.356157	0.279472	NPC2/APOE/APOC1/PLTP/APOC2	5	pathway_KEGG	0.012285	Up
hsa04614	Renin-angiotensin system	3/407	23/8093	0.106296	0.35648	0.279726	CPA3/ANPEP/AGT	3	pathway_KEGG	0.00737101	Up
hsa04926	Relaxin signaling pathway	10/407	129/8093	0.114228	0.378468	0.296979	PLCB2/ARRB2/GNA15/ADCY4/MAPK13/TGFBR2/COL4A2/GNG2/ACTA2/FOS	10	pathway_KEGG	0.02457	Up
hsa04750	Inflammatory mediator regulation of TRP channels	8/407	98/8093	0.119235	0.390353	0.306306	PLCB2/PRKCD/ADCY4/IL1B/PLA2G6/PRKCH/MAPK13/TRPV2	8	pathway_KEGG	0.019656	Up
hsa04151	PI3K-Akt signaling pathway	23/407	354/8093	0.123247	0.398742	0.312888	TLR4/PIK3R5/CSF1R/PIK3AP1/CSF3R/JAK3/LPAR5/OSM/TLR2/CSF1/SGK1/IL2RG/PDGFB/TEK/LPAR6/IL2RB/COL4A2/GNG2/SPP1/CHAD/HGF/ITGA11/ITGB3	23	pathway_KEGG	0.0565111	Up
hsa05120	Epithelial cell signaling in Helicobacter pylori infection	6/407	70/8093	0.139034	0.444586	0.348861	MAPK13/F11R/TCIRG1/CXCL2/CCL5/ATP6V0D2	6	pathway_KEGG	0.014742	Up
hsa04520	Adherens junction	6/407	71/8093	0.145873	0.461094	0.361815	WAS/PTPN6/PTPRJ/PTPRM/RAC2/TGFBR2	6	pathway_KEGG	0.014742	Up
GO:0002283	neutrophil activation involved in immune response	90/720	490/18866	1.43138e-36	6.73464e-33	4.91039e-33	DOCK2/ALOX5/PLEKHO2/TRPM2/NFAM1/ITGAM/SIGLEC9/FGL2/DOK3/LYZ/PYCARD/CYBB/LILRB2/ARHGAP9/PRKCD/CD14/PTAFR/CTSS/TBC1D10C/ADA2/BIN2/PTPN6/FCN1/FCGR2A/CD53/STXBP2/FGR/ITGB2/SELL/MNDA/ITGAL/FPR1/C3AR1/NCKAP1L/TYROBP/CD33/FUCA1/PTPRC/CD300A/ITGAX/SIRPA/S100A9/SE	90	geneontology_Biological_Process	0.125	Up
GO:0043312	neutrophil degranulation	89/720	487/18866	5.49916e-36	1.29368e-32	9.43251e-33	DOCK2/ALOX5/PLEKHO2/TRPM2/NFAM1/ITGAM/SIGLEC9/FGL2/DOK3/LYZ/PYCARD/CYBB/LILRB2/ARHGAP9/PRKCD/CD14/PTAFR/CTSS/TBC1D10C/ADA2/BIN2/PTPN6/FCN1/FCGR2A/CD53/STXBP2/FGR/ITGB2/SELL/MNDA/ITGAL/FPR1/C3AR1/NCKAP1L/TYROBP/CD33/FUCA1/PTPRC/CD300A/ITGAX/SIRPA/S100A9/SE	89	geneontology_Biological_Process	0.123611	Up
GO:0034341	response to interferon-gamma	55/720	202/18866	1.01761e-31	1.59594e-28	1.16364e-28	IRF5/WAS/IRF8/HLA-DRB1/CIITA/AIF1/HLA-DPA1/HLA-DPB1/HLA-DRB5/PRKCD/TRIM22/CX3CL1/PTAFR/HLA-E/TLR4/STXBP2/HCK/CASP1/FCGR1B/HLA-DRA/SIRPA/LGALS9/HLA-DQA1/HLA-DQB1/CXCL16/TLR2/CCL4/ZYX/FCGR1A/SNCA/CCL8/IRF1/IRF9/CCL2/IFI30/CD40/ICAM1/RAB20/SLC11A1/NLRC5/OAS1	55	geneontology_Biological_Process	0.0763889	Up
GO:0042110	T cell activation	82/720	483/18866	8.39518e-31	9.87483e-28	7.19997e-28	RIPK3/DOCK2/SASH3/TNFAIP8L2/WAS/CD209/JAML/CORO1A/CCR2/DOCK8/HLA-DMB/HLA-DRB1/FGL2/AIF1/VSIG4/CD74/RASAL3/PYCARD/HLA-DPA1/CLEC7A/LILRB2/VSIR/HLA-DPB1/CD4/VAV1/IL18/LILRB1/HLA-E/PTPN6/NLRP3/ZAP70/LILRB4/FCGR2B/CD2/CD3E/LCK/ITGAL/HLA-DOA/SEMA4A/NCKAP1L/JAK3	82	geneontology_Biological_Process	0.113889	Up
GO:0070661	leukocyte proliferation	66/720	313/18866	1.27016e-30	1.19522e-27	8.71464e-28	RIPK3/DOCK2/SASH3/CD209/CORO1A/BTK/CCR2/DOCK8/HLA-DMB/HLA-DRB1/AIF1/VSIG4/CD74/RASAL3/PYCARD/HLA-DPA1/LILRB2/VSIR/HLA-DPB1/CD22/CD4/PRKCD/IL18/LILRB1/LST1/CX3CL1/INPP5D/HLA-E/PTPN6/TLR4/ZAP70/FCGR2B/CD3E/CSF1R/MNDA/NCKAP1L/TYROBP/JAK3/PTPRC/CD300A/LGALS9/	66	geneontology_Biological_Process	0.0916667	Up
GO:0070663	regulation of leukocyte proliferation	58/720	240/18866	2.35905e-30	1.84989e-27	1.3488e-27	RIPK3/SASH3/CD209/CORO1A/BTK/CCR2/HLA-DMB/HLA-DRB1/AIF1/VSIG4/CD74/RASAL3/PYCARD/HLA-DPA1/LILRB2/VSIR/HLA-DPB1/CD22/CD4/IL18/LILRB1/LST1/INPP5D/HLA-E/PTPN6/TLR4/ZAP70/FCGR2B/CD3E/CSF1R/MNDA/NCKAP1L/TYROBP/JAK3/PTPRC/CD300A/LGALS9/TNFRSF1B/CLECL1/IL1B/HHEX	58	geneontology_Biological_Process	0.0805556	Up
GO:0001819	positive regulation of cytokine production	77/720	447/18866	2.20973e-29	1.48525e-26	1.08293e-26	IRF5/SASH3/NFAM1/CCR2/IRF8/AIF1/CD74/PYCARD/HLA-DPA1/GPSM3/CLEC7A/LILRB2/HLA-DPB1/CD4/LTB/IL18/LILRB1/CD14/CX3CL1/PTAFR/HLA-E/NLRP3/TLR4/FCN1/IL17RA/FGR/CD2/CD3E/MNDA/C3AR1/CASP1/CARD9/TYROBP/PTPRC/DHX58/LGALS9/TREM2/IL1B/PTPRJ/FCER1G/HAVCR2/OSM/HYAL2/TLR	77	geneontology_Biological_Process	0.106944	Up
GO:0007159	leukocyte cell-cell adhesion	69/720	364/18866	5.4375e-29	3.19793e-26	2.33169e-26	SASH3/ALOX5/TNFAIP8L2/CD209/CORO1A/CCR2/DOCK8/HLA-DMB/HLA-DRB1/FGL2/AIF1/VSIG4/CD74/RASAL3/PYCARD/HLA-DPA1/LILRB2/VSIR/HLA-DPB1/CD4/VAV1/IL18/LILRB1/PTAFR/HLA-E/PTPN6/NLRP3/ZAP70/LILRB4/ITGB2/FCGR2B/CD3E/SELL/LCK/ITGAL/NCKAP1L/JAK3/FERMT3/PTPRC/CD300A/SIR	69	geneontology_Biological_Process	0.0958333	Up
GO:0032944	regulation of mononuclear cell proliferation	54/720	221/18866	1.39653e-28	7.30077e-26	5.32316e-26	RIPK3/SASH3/CD209/CORO1A/BTK/CCR2/HLA-DMB/HLA-DRB1/AIF1/VSIG4/CD74/RASAL3/PYCARD/HLA-DPA1/LILRB2/VSIR/HLA-DPB1/CD22/CD4/IL18/LILRB1/LST1/INPP5D/HLA-E/PTPN6/TLR4/ZAP70/FCGR2B/CD3E/MNDA/NCKAP1L/TYROBP/JAK3/PTPRC/CD300A/LGALS9/TNFRSF1B/CLECL1/IL1B/CD1D/HAVCR	54	geneontology_Biological_Process	0.075	Up
GO:0071346	cellular response to interferon-gamma	49/720	182/18866	4.04358e-28	1.9025e-25	1.38716e-25	IRF5/WAS/IRF8/HLA-DRB1/CIITA/AIF1/HLA-DPA1/HLA-DPB1/HLA-DRB5/PRKCD/TRIM22/CX3CL1/PTAFR/HLA-E/TLR4/STXBP2/HCK/CASP1/FCGR1B/HLA-DRA/SIRPA/LGALS9/HLA-DQA1/HLA-DQB1/TLR2/CCL4/ZYX/FCGR1A/CCL8/IRF1/IRF9/CCL2/IFI30/ICAM1/RAB20/NLRC5/OAS1/CCL14/CCL3/IRF7/SOCS3/GB	49	geneontology_Biological_Process	0.0680556	Up
GO:0050670	regulation of lymphocyte proliferation	53/720	219/18866	7.52285e-28	3.21773e-25	2.34612e-25	RIPK3/SASH3/CD209/CORO1A/BTK/CCR2/HLA-DMB/HLA-DRB1/AIF1/VSIG4/CD74/RASAL3/PYCARD/HLA-DPA1/LILRB2/VSIR/HLA-DPB1/CD22/CD4/IL18/LILRB1/LST1/INPP5D/HLA-E/PTPN6/TLR4/ZAP70/FCGR2B/CD3E/MNDA/NCKAP1L/TYROBP/JAK3/PTPRC/CD300A/LGALS9/TNFRSF1B/CLECL1/IL1B/CD1D/HAVCR	53	geneontology_Biological_Process	0.0736111	Up
GO:0006909	phagocytosis	69/720	382/18866	1.14074e-27	4.47263e-25	3.2611e-25	DOCK2/WAS/NCF4/CORO1A/ITGAM/CCR2/IRF8/AIF1/MYO7A/MYO1G/PYCARD/CLEC7A/VAV1/PRKCD/P2RY6/CD300LF/CD14/ARHGAP25/BIN2/TLR4/FCN1/FCGR2A/HCK/FGR/ITGB2/FCGR2B/ITGAL/NCKAP1L/TYROBP/PTPRC/CD300A/SIRPA/TREM2/IL1B/MSR1/PTPRJ/FCER1G/GAS6/TLR2/PLA2G6/NCF2/CD247/FCGR1A/	69	geneontology_Biological_Process	0.0958333	Up
GO:0032943	mononuclear cell proliferation	59/720	286/18866	6.29935e-27	2.27988e-24	1.66232e-24	RIPK3/DOCK2/SASH3/CD209/CORO1A/BTK/CCR2/DOCK8/HLA-DMB/HLA-DRB1/AIF1/VSIG4/CD74/RASAL3/PYCARD/HLA-DPA1/LILRB2/VSIR/HLA-DPB1/CD22/CD4/PRKCD/IL18/LILRB1/LST1/INPP5D/HLA-E/PTPN6/TLR4/ZAP70/FCGR2B/CD3E/MNDA/NCKAP1L/TYROBP/JAK3/PTPRC/CD300A/LGALS9/TNFRSF1B/CLEC	59	geneontology_Biological_Process	0.0819444	Up
GO:0050867	positive regulation of cell activation	71/720	421/18866	1.48066e-26	4.97609e-24	3.62819e-24	SASH3/PLEK/CD209/CORO1A/BTK/ITGAM/CCR2/DOCK8/HLA-DMB/AIF1/CD74/RASAL3/PYCARD/HLA-DPA1/TNFSF13/CLEC7A/LILRB2/VSIR/HLA-DPB1/CD4/VAV1/IL18/LILRB1/PTAFR/INPP5D/HLA-E/PTPN6/NLRP3/TLR4/ZAP70/LILRB4/FGR/ITGB2/CD2/CD3E/LCK/NCKAP1L/TYROBP/JAK3/PTPRC/SIRPA/LGALS9/V	71	geneontology_Biological_Process	0.0986111	Up
GO:0046651	lymphocyte proliferation	58/720	283/18866	2.48958e-26	7.80898e-24	5.69371e-24	RIPK3/DOCK2/SASH3/CD209/CORO1A/BTK/CCR2/DOCK8/HLA-DMB/HLA-DRB1/AIF1/VSIG4/CD74/RASAL3/PYCARD/HLA-DPA1/LILRB2/VSIR/HLA-DPB1/CD22/CD4/PRKCD/IL18/LILRB1/LST1/INPP5D/HLA-E/PTPN6/TLR4/ZAP70/FCGR2B/CD3E/MNDA/NCKAP1L/TYROBP/JAK3/PTPRC/CD300A/LGALS9/TNFRSF1B/CLEC	58	geneontology_Biological_Process	0.0805556	Up
GO:0045785	positive regulation of cell adhesion	71/720	428/18866	4.1606e-26	1.22348e-23	8.92066e-24	SASH3/ALOX5/CD209/CORO1A/CCR2/DOCK8/HLA-DMB/AIF1/CD74/RASAL3/PYCARD/HLA-DPA1/LILRB2/VSIR/HLA-DPB1/CD4/VAV1/IL18/LILRB1/CX3CL1/PTAFR/PTK2B/HLA-E/PTPN6/NLRP3/ZAP70/LILRB4/ITGB2/CD3E/LCK/NCKAP1L/JAK3/TRIOBP/PTPRC/SIRPA/LGALS9/CLECL1/IL1B/PTPRJ/CD1D/NFKBID/HA	71	geneontology_Biological_Process	0.0986111	Up
GO:0002697	regulation of immune effector process	74/720	470/18866	1.01471e-25	2.80835e-23	2.04764e-23	RIPK3/SASH3/WAS/BTK/ITGAM/CCR2/FES/HLA-DMB/FGL2/C1QA/VSIG4/CD74/PYCARD/C1QB/CFI/TNFSF13/C1QC/PARP3/CD22/VAV1/SLAMF8/IL18/LILRB1/PTAFR/HLA-E/PTPN6/NLRP3/TLR4/STXBP2/FGR/ITGB2/FCGR2B/C3AR1/ARRB2/TYROBP/JAK3/PTPRC/DHX58/CD300A/LGALS9/VAMP8/TNFRSF1B/IL1B/PTPR	74	geneontology_Biological_Process	0.102778	Up
GO:0022407	regulation of cell-cell adhesion	71/720	439/18866	2.01554e-25	5.2684e-23	3.84131e-23	SASH3/ALOX5/TNFAIP8L2/CD209/CORO1A/CCR2/DOCK8/HLA-DMB/HLA-DRB1/FGL2/AIF1/VSIG4/CD74/RASAL3/PYCARD/HLA-DPA1/LILRB2/VSIR/HLA-DPB1/CD4/VAV1/PRKCD/IL18/LILRB1/CX3CL1/PTAFR/HLA-E/PTPN6/NLRP3/ZAP70/LILRB4/ITGB2/FCGR2B/CD3E/LCK/NCKAP1L/JAK3/FERMT3/PTPRC/CD300A/S	71	geneontology_Biological_Process	0.0986111	Up
GO:0050863	regulation of T cell activation	61/720	332/18866	5.79648e-25	1.43539e-22	1.04658e-22	RIPK3/SASH3/TNFAIP8L2/CD209/CORO1A/CCR2/DOCK8/HLA-DMB/HLA-DRB1/FGL2/AIF1/VSIG4/CD74/RASAL3/PYCARD/HLA-DPA1/LILRB2/VSIR/HLA-DPB1/CD4/VAV1/IL18/LILRB1/HLA-E/PTPN6/NLRP3/ZAP70/LILRB4/FCGR2B/CD2/CD3E/LCK/HLA-DOA/NCKAP1L/JAK3/PTPRC/CD300A/SIRPA/LGALS9/TNFRSF1B	61	geneontology_Biological_Process	0.0847222	Up
GO:0030595	leukocyte chemotaxis	51/720	232/18866	9.41277e-25	2.21435e-22	1.61454e-22	ALOX5/TRPM2/JAML/CORO1A/CCR2/AIF1/CD74/GPSM3/VAV1/SLAMF8/CX3CL1/PTK2B/IL17RA/ITGB2/CSF1R/C3AR1/NCKAP1L/CSF3R/S100A9/LGALS9/IL1B/CCR5/FCER1G/GAS6/CXCL16/MPP1/CSF1/C5AR1/CCL4/ADGRE2/PDGFB/RAC2/ADAM8/CCL8/TNFRSF11A/CXCL10/CCL2/HSD3B7/S1PR1/SLIT2/CXCL12/CCR1/	51	geneontology_Biological_Process	0.0708333	Up
GO:1903039	positive regulation of leukocyte cell-cell adhesion	51/720	235/18866	1.76788e-24	3.9609e-22	2.88798e-22	SASH3/ALOX5/CD209/CORO1A/CCR2/DOCK8/HLA-DMB/AIF1/CD74/RASAL3/PYCARD/HLA-DPA1/LILRB2/VSIR/HLA-DPB1/CD4/VAV1/IL18/LILRB1/PTAFR/HLA-E/PTPN6/NLRP3/ZAP70/LILRB4/ITGB2/CD3E/LCK/NCKAP1L/JAK3/PTPRC/SIRPA/LGALS9/CLECL1/IL1B/CD1D/NFKBID/HAVCR2/EBI3/TNFSF13B/TNFRSF1	51	geneontology_Biological_Process	0.0708333	Up
GO:1903037	regulation of leukocyte cell-cell adhesion	60/720	329/18866	2.15841e-24	4.61606e-22	3.36568e-22	SASH3/ALOX5/TNFAIP8L2/CD209/CORO1A/CCR2/DOCK8/HLA-DMB/HLA-DRB1/FGL2/AIF1/VSIG4/CD74/RASAL3/PYCARD/HLA-DPA1/LILRB2/VSIR/HLA-DPB1/CD4/VAV1/IL18/LILRB1/PTAFR/HLA-E/PTPN6/NLRP3/ZAP70/LILRB4/ITGB2/FCGR2B/CD3E/LCK/NCKAP1L/JAK3/PTPRC/CD300A/SIRPA/LGALS9/CLECL1/I	60	geneontology_Biological_Process	0.0833333	Up
GO:0060326	cell chemotaxis	58/720	311/18866	4.01072e-24	8.20454e-22	5.98213e-22	ALOX5/TRPM2/JAML/CORO1A/CCR2/AIF1/CD74/GPSM3/VAV1/PRKCD/SLAMF8/CX3CL1/PTK2B/BIN2/IL17RA/ITGB2/CSF1R/C3AR1/NCKAP1L/ARRB2/CSF3R/S100A9/LGALS9/IL1B/CCR5/FCER1G/GAS6/CXCL16/MPP1/CSF1/C5AR1/CCL4/ADGRE2/PDGFB/PLEKHG5/RAC2/ADAM8/CCL8/TNFRSF11A/CXCL10/CCL2/HSD3B7	58	geneontology_Biological_Process	0.0805556	Up
GO:1902105	regulation of leukocyte differentiation	56/720	290/18866	4.20057e-24	8.23487e-22	6.00424e-22	SASH3/BTK/NFAM1/CCR2/FES/HLA-DRB1/FGL2/HCLS1/CD74/C1QC/LILRB2/VSIR/CD4/TMEM176B/SLAMF8/IL18/LILRB1/INPP5D/PTPN6/NLRP3/TLR4/ZAP70/TMEM176A/LILRB4/FCGR2B/CD2/HLA-DOA/NCKAP1L/TYROBP/JAK3/PTPRC/LGALS9/TREM2/IL1B/NFKBID/GAS6/RASSF2/CSF1/LAG3/EVI2B/CD27/ADAM8/I	56	geneontology_Biological_Process	0.0777778	Up
GO:0030098	lymphocyte differentiation	63/720	368/18866	5.15316e-24	9.51523e-22	6.93778e-22	RIPK3/DOCK2/MFNG/SASH3/BTK/NFAM1/CCR2/FGL2/CD74/LYL1/BLNK/LILRB2/VSIR/CD4/VAV1/SLAMF8/IL18/IKZF1/INPP5D/PTK2B/PTPN6/NLRP3/ZAP70/LILRB4/FCGR2B/CD2/CD3E/LCK/HLA-DOA/SEMA4A/NCKAP1L/JAK3/PTPRC/SPI1/CD3D/LGALS9/IL1B/HHEX/PTPRJ/CD1D/FCER1G/NFKBID/GAS6/LAG3/CD79	63	geneontology_Biological_Process	0.0875	Up
GO:0002683	negative regulation of immune system process	71/720	463/18866	5.25815e-24	9.51523e-22	6.93778e-22	TNFAIP8L2/BTK/CCR2/HLA-DRB1/FGL2/VSIG4/CD74/C1QC/LILRB2/PARP3/VSIR/CD22/TMEM176B/SLAMF8/LILRB1/CD300LF/LST1/CX3CL1/INPP5D/PTK2B/TBC1D10C/HLA-E/PTPN6/TLR4/TMEM176A/LILRB4/FGR/FCGR2B/MNDA/SAMSN1/HLA-DOA/ARRB2/TYROBP/JAK3/PTPRC/DHX58/CD300A/LGALS9/PTPRJ/LPXN	71	geneontology_Biological_Process	0.0986111	Up
GO:0002696	positive regulation of leukocyte activation	66/720	406/18866	8.20156e-24	1.4292e-21	1.04206e-21	SASH3/CD209/CORO1A/BTK/ITGAM/CCR2/DOCK8/HLA-DMB/AIF1/CD74/RASAL3/PYCARD/HLA-DPA1/TNFSF13/CLEC7A/LILRB2/VSIR/HLA-DPB1/CD4/VAV1/IL18/LILRB1/PTAFR/INPP5D/HLA-E/PTPN6/NLRP3/TLR4/ZAP70/LILRB4/FGR/ITGB2/CD2/CD3E/LCK/NCKAP1L/TYROBP/JAK3/PTPRC/SIRPA/LGALS9/VAMP8/	66	geneontology_Biological_Process	0.0916667	Up
GO:0050866	negative regulation of cell activation	47/720	207/18866	1.54958e-23	2.60385e-21	1.89853e-21	TNFAIP8L2/BTK/CCR2/HLA-DRB1/FGL2/VSIG4/CD74/LILRB2/PARP3/VSIR/PRKCD/LILRB1/CD300LF/LST1/CX3CL1/INPP5D/TBC1D10C/PTPN6/FGR/FCGR2B/MNDA/SAMSN1/TYROBP/JAK3/PTPRC/CD300A/LGALS9/NFKBID/HAVCR2/SH2B3/LAG3/TNFRSF14/PDGFB/MERTK/PTPN22/IRF1/HMOX1/APOE/CD86/MILR1/THB	47	geneontology_Biological_Process	0.0652778	Up
GO:0022409	positive regulation of cell-cell adhesion	54/720	279/18866	2.50271e-23	4.06043e-21	2.96055e-21	SASH3/ALOX5/CD209/CORO1A/CCR2/DOCK8/HLA-DMB/AIF1/CD74/RASAL3/PYCARD/HLA-DPA1/LILRB2/VSIR/HLA-DPB1/CD4/VAV1/IL18/LILRB1/CX3CL1/PTAFR/HLA-E/PTPN6/NLRP3/ZAP70/LILRB4/ITGB2/CD3E/LCK/NCKAP1L/JAK3/PTPRC/SIRPA/LGALS9/CLECL1/IL1B/CD1D/NFKBID/HAVCR2/EBI3/TNFSF13B/	54	geneontology_Biological_Process	0.075	Up
GO:0050870	positive regulation of T cell activation	47/720	214/18866	7.03716e-23	1.10366e-20	8.04706e-21	SASH3/CD209/CORO1A/CCR2/DOCK8/HLA-DMB/AIF1/CD74/RASAL3/PYCARD/HLA-DPA1/LILRB2/VSIR/HLA-DPB1/CD4/VAV1/IL18/LILRB1/HLA-E/PTPN6/NLRP3/ZAP70/LILRB4/CD3E/LCK/NCKAP1L/JAK3/PTPRC/SIRPA/LGALS9/CLECL1/IL1B/CD1D/NFKBID/HAVCR2/EBI3/TNFSF13B/TNFRSF14/CD27/ADAM8/PTPN2	47	geneontology_Biological_Process	0.0652778	Up
GO:0042129	regulation of T cell proliferation	41/720	167/18866	4.73019e-22	7.17921e-20	5.23453e-20	RIPK3/SASH3/CD209/CORO1A/CCR2/HLA-DMB/HLA-DRB1/AIF1/VSIG4/RASAL3/PYCARD/HLA-DPA1/LILRB2/VSIR/HLA-DPB1/CD4/IL18/LILRB1/HLA-E/PTPN6/ZAP70/CD3E/NCKAP1L/JAK3/PTPRC/LGALS9/TNFRSF1B/CLECL1/IL1B/CD1D/HAVCR2/EBI3/TNFSF13B/TNFRSF14/RAC2/PTPN22/IRF1/CD86/TGFBR2/VCA	41	geneontology_Biological_Process	0.0569444	Up
GO:0042098	T cell proliferation	44/720	195/18866	5.43299e-22	7.98819e-20	5.82438e-20	RIPK3/DOCK2/SASH3/CD209/CORO1A/CCR2/DOCK8/HLA-DMB/HLA-DRB1/AIF1/VSIG4/RASAL3/PYCARD/HLA-DPA1/LILRB2/VSIR/HLA-DPB1/CD4/IL18/LILRB1/HLA-E/PTPN6/ZAP70/CD3E/NCKAP1L/JAK3/PTPRC/LGALS9/TNFRSF1B/CLECL1/IL1B/CD1D/HAVCR2/EBI3/TNFSF13B/TNFRSF14/RAC2/PTPN22/IRF1/CD8	44	geneontology_Biological_Process	0.0611111	Up
GO:0002237	response to molecule of bacterial origin	59/720	356/18866	8.17218e-22	1.16515e-19	8.49541e-20	IRF5/IL10RA/CSF2RB/IRF8/PYCARD/LILRB2/LY86/IL18/LILRB1/CD14/CX3CL1/PTAFR/NLRP3/TLR4/HCK/FCGR2B/CASP1/CARD9/SIRPA/S100A9/LGALS9/TNFRSF1B/TREM2/IL1B/CCR5/HAVCR2/TLR2/C5AR1/TLR1/GGT7/SIGIRR/LILRA2/SNCA/CD68/PTPN22/TNFRSF11A/CXCL10/CCL2/LY96/CD40/CD86/ICAM1/C	59	geneontology_Biological_Process	0.0819444	Up
GO:0097529	myeloid leukocyte migration	46/720	222/18866	2.62355e-21	3.63053e-19	2.64711e-19	JAML/CCR2/AIF1/CD74/VAV1/SLAMF8/CX3CL1/PTK2B/IL17RA/ITGB2/CSF1R/C3AR1/NCKAP1L/CSF3R/CD300A/SIRPA/S100A9/TREM2/IL1B/FCER1G/MPP1/CSF1/C5AR1/CCL4/ADGRE2/PDGFB/RAC2/ADAM8/CCL8/TNFRSF11A/CXCL10/CCL2/CX3CR1/SLIT2/CXCL12/CCR1/CCL14/CCL3/S100A8/CD200/CXCL2/CXCL9/	46	geneontology_Biological_Process	0.0638889	Up
GO:0050766	positive regulation of phagocytosis	27/720	68/18866	4.8783e-21	6.55782e-19	4.78147e-19	DOCK2/PYCARD/CLEC7A/CD300LF/FCGR2B/NCKAP1L/PTPRC/SIRPA/TREM2/IL1B/PTPRJ/FCER1G/GAS6/IL2RG/MERTK/IL15RA/CCL2/IL2RB/SLC11A1/C3/C4B/C2/MFGE8/CYBA/C4A/PLA2G5/PTX3	27	geneontology_Biological_Process	0.0375	Up
GO:0002460	adaptive immune response based on somatic recombination of immune receptors built from immunoglobulin superfamily domains	59/720	370/18866	5.92667e-21	7.74582e-19	5.64766e-19	RIPK3/SASH3/WAS/BTK/CCR2/HLA-DRB1/FGL2/C1QA/MYO1G/CD74/C1QB/CFI/TNFSF13/C1QC/PARP3/CD4/PRKCD/IL18/LILRB1/INPP5D/HLA-E/PTPN6/NLRP3/TLR4/FCGR2B/SEMA4A/JAK3/PTPRC/TNFRSF1B/IL1B/CD1D/FCER1G/NFKBID/HAVCR2/HLA-DQB1/EBI3/TNFSF13B/SERPING1/UNC13D/IL18BP/C1RL/CD27	59	geneontology_Biological_Process	0.0819444	Up
GO:0050764	regulation of phagocytosis	31/720	97/18866	1.13499e-20	1.44327e-18	1.05233e-18	DOCK2/PYCARD/CLEC7A/CD300LF/HCK/FGR/FCGR2B/NCKAP1L/PTPRC/CD300A/SIRPA/TREM2/IL1B/PTPRJ/FCER1G/GAS6/TLR2/IL2RG/MERTK/IL15RA/CCL2/IL2RB/SLC11A1/C3/C4B/C2/MFGE8/CYBA/C4A/PLA2G5/PTX3	31	geneontology_Biological_Process	0.0430556	Up
GO:0060333	interferon-gamma-mediated signaling pathway	30/720	91/18866	1.73316e-20	2.14593e-18	1.56464e-18	IRF5/IRF8/HLA-DRB1/CIITA/HLA-DPA1/HLA-DPB1/HLA-DRB5/PRKCD/TRIM22/PTAFR/HLA-E/HCK/FCGR1B/HLA-DRA/HLA-DQA1/HLA-DQB1/FCGR1A/IRF1/IRF9/IFI30/ICAM1/NLRC5/OAS1/IRF7/SOCS3/VCAM1/HLA-DQB2/HLA-C/HLA-DQA2/GBP1	30	geneontology_Biological_Process	0.0416667	Up
GO:0002695	negative regulation of leukocyte activation	41/720	184/18866	2.34019e-20	2.82322e-18	2.05848e-18	TNFAIP8L2/BTK/CCR2/HLA-DRB1/FGL2/VSIG4/CD74/LILRB2/PARP3/VSIR/LILRB1/CD300LF/LST1/CX3CL1/INPP5D/TBC1D10C/PTPN6/FGR/FCGR2B/MNDA/SAMSN1/TYROBP/JAK3/PTPRC/CD300A/LGALS9/NFKBID/HAVCR2/LAG3/TNFRSF14/MERTK/PTPN22/IRF1/HMOX1/CD86/MILR1/CD84/GRN/CD200/CST7/MDK	41	geneontology_Biological_Process	0.0569444	Up
GO:1903706	regulation of hemopoiesis	68/720	498/18866	3.6507e-20	4.29414e-18	3.13096e-18	SASH3/BTK/NFAM1/CCR2/FES/HLA-DRB1/FGL2/HCLS1/CD74/C1QC/LILRB2/VSIR/CD4/TMEM176B/SLAMF8/IL18/LILRB1/INPP5D/PTK2B/PTPN6/NLRP3/TLR4/ZAP70/TMEM176A/LILRB4/LMO2/FCGR2B/CD2/HLA-DOA/NCKAP1L/TYROBP/CSF3R/JAK3/PTPRC/SPI1/LGALS9/TREM2/IL1B/NFKBID/GAS6/OSM/RASSF2/CS	68	geneontology_Biological_Process	0.0944444	Up
GO:0070665	positive regulation of leukocyte proliferation	37/720	150/18866	4.26887e-20	4.89879e-18	3.57182e-18	SASH3/CD209/CORO1A/CCR2/HLA-DMB/AIF1/CD74/RASAL3/PYCARD/HLA-DPA1/LILRB2/HLA-DPB1/CD4/IL18/HLA-E/TLR4/ZAP70/CD3E/CSF1R/NCKAP1L/JAK3/PTPRC/LGALS9/CLECL1/IL1B/CD1D/HAVCR2/EBI3/CSF1/TNFSF13B/PTPN22/CD40/CD86/TGFBR2/BST2/VCAM1/CCL5	37	geneontology_Biological_Process	0.0513889	Up
GO:0042102	positive regulation of T cell proliferation	31/720	101/18866	4.37431e-20	4.90027e-18	3.5729e-18	SASH3/CD209/CORO1A/CCR2/HLA-DMB/AIF1/RASAL3/PYCARD/HLA-DPA1/LILRB2/HLA-DPB1/CD4/IL18/HLA-E/ZAP70/CD3E/NCKAP1L/JAK3/PTPRC/LGALS9/CLECL1/IL1B/CD1D/HAVCR2/EBI3/TNFSF13B/PTPN22/CD86/TGFBR2/VCAM1/CCL5	31	geneontology_Biological_Process	0.0430556	Up
GO:0002449	lymphocyte mediated immunity	57/720	366/18866	8.95709e-20	9.80072e-18	7.14594e-18	RIPK3/SASH3/WAS/CORO1A/BTK/CCR2/HLA-DRB1/FGL2/C1QA/MYO1G/CD74/C1QB/CFI/TNFSF13/C1QC/PARP3/VAV1/PRKCD/IL18/LILRB1/INPP5D/HLA-E/PTPN6/NLRP3/FCGR2B/ARRB2/PTPRC/LGALS9/TNFRSF1B/IL1B/CD1D/FCER1G/HAVCR2/HLA-DQB1/LAG3/SERPING1/UNC13D/C1RL/CD27/CD40/JAG1/POU2F2/I	57	geneontology_Biological_Process	0.0791667	Up
GO:0002703	regulation of leukocyte mediated immunity	43/720	211/18866	1.05631e-19	1.12953e-17	8.23568e-18	RIPK3/SASH3/WAS/BTK/ITGAM/CCR2/FES/TNFSF13/PARP3/VAV1/IL18/LILRB1/PTAFR/HLA-E/PTPN6/NLRP3/TLR4/STXBP2/FGR/ITGB2/FCGR2B/ARRB2/TYROBP/JAK3/PTPRC/CD300A/LGALS9/VAMP8/TNFRSF1B/IL1B/CD1D/FCER1G/HAVCR2/LAG3/ADGRE2/UNC13D/RAC2/HMOX1/CD40/ICAM1/C3/CD84/BST2	43	geneontology_Biological_Process	0.0597222	Up
GO:0032946	positive regulation of mononuclear cell proliferation	35/720	137/18866	1.29705e-19	1.35614e-17	9.88795e-18	SASH3/CD209/CORO1A/CCR2/HLA-DMB/AIF1/CD74/RASAL3/PYCARD/HLA-DPA1/LILRB2/HLA-DPB1/CD4/IL18/HLA-E/TLR4/ZAP70/CD3E/NCKAP1L/JAK3/PTPRC/LGALS9/CLECL1/IL1B/CD1D/HAVCR2/EBI3/CSF1/TNFSF13B/PTPN22/CD40/CD86/TGFBR2/VCAM1/CCL5	35	geneontology_Biological_Process	0.0486111	Up
GO:0051251	positive regulation of lymphocyte activation	56/720	357/18866	1.35179e-19	1.38265e-17	1.00812e-17	SASH3/CD209/CORO1A/BTK/CCR2/DOCK8/HLA-DMB/AIF1/CD74/RASAL3/PYCARD/HLA-DPA1/TNFSF13/CLEC7A/LILRB2/VSIR/HLA-DPB1/CD4/VAV1/IL18/LILRB1/INPP5D/HLA-E/PTPN6/NLRP3/TLR4/ZAP70/LILRB4/CD3E/LCK/NCKAP1L/TYROBP/JAK3/PTPRC/SIRPA/LGALS9/CLECL1/IL1B/CD1D/NFKBID/HAVCR2/G	56	geneontology_Biological_Process	0.0777778	Up
GO:0032496	response to lipopolysaccharide	54/720	334/18866	1.51794e-19	1.51955e-17	1.10794e-17	IL10RA/CSF2RB/IRF8/PYCARD/LILRB2/LY86/IL18/LILRB1/CD14/CX3CL1/PTAFR/NLRP3/TLR4/HCK/CASP1/SIRPA/S100A9/LGALS9/TNFRSF1B/TREM2/IL1B/CCR5/HAVCR2/TLR2/C5AR1/GGT7/SIGIRR/LILRA2/SNCA/CD68/PTPN22/TNFRSF11A/CXCL10/CCL2/LY96/CD40/CD86/ICAM1/CX3CR1/SLC11A1/GGT5/THBD	54	geneontology_Biological_Process	0.075	Up
GO:0002429	immune response-activating cell surface receptor signaling pathway	65/720	481/18866	4.48104e-19	4.30272e-17	3.13721e-17	WAS/CD209/CLEC10A/BTK/NFAM1/HLA-DRB1/LCP2/MYO1G/HLA-DPA1/BLNK/HLA-DPB1/CD22/CD4/HLA-DRB5/VAV1/PRKCD/INPP5D/PTPN6/FCN1/ZAP70/FCGR2A/LILRB4/HCK/FPR3/FGR/FCGR2B/CD3E/MNDA/LCK/FPR1/C3AR1/NCKAP1L/LAT2/CARD9/HLA-DRA/PTPRC/CD300A/CD3D/HLA-DQA1/PTPRJ/LPXN/FCER1G/	65	geneontology_Biological_Process	0.0902778	Up
GO:0002757	immune response-activating signal transduction	65/720	481/18866	4.48104e-19	4.30272e-17	3.13721e-17	WAS/CD209/CLEC10A/BTK/NFAM1/HLA-DRB1/LCP2/MYO1G/HLA-DPA1/BLNK/HLA-DPB1/CD22/CD4/HLA-DRB5/VAV1/PRKCD/INPP5D/PTPN6/FCN1/ZAP70/FCGR2A/LILRB4/HCK/FPR3/FGR/FCGR2B/CD3E/MNDA/LCK/FPR1/C3AR1/NCKAP1L/LAT2/CARD9/HLA-DRA/PTPRC/CD300A/CD3D/HLA-DQA1/PTPRJ/LPXN/FCER1G/	65	geneontology_Biological_Process	0.0902778	Up
GO:0050671	positive regulation of lymphocyte proliferation	34/720	136/18866	9.07977e-19	8.54407e-17	6.22968e-17	SASH3/CD209/CORO1A/CCR2/HLA-DMB/AIF1/CD74/RASAL3/PYCARD/HLA-DPA1/LILRB2/HLA-DPB1/CD4/IL18/HLA-E/TLR4/ZAP70/CD3E/NCKAP1L/JAK3/PTPRC/LGALS9/CLECL1/IL1B/CD1D/HAVCR2/EBI3/TNFSF13B/PTPN22/CD40/CD86/TGFBR2/VCAM1/CCL5	34	geneontology_Biological_Process	0.0472222	Up
GO:0002699	positive regulation of immune effector process	43/720	223/18866	9.65279e-19	8.90517e-17	6.49297e-17	SASH3/BTK/ITGAM/CCR2/FES/HLA-DMB/CD74/TNFSF13/VAV1/IL18/LILRB1/PTAFR/HLA-E/NLRP3/TLR4/STXBP2/FGR/ITGB2/TYROBP/PTPRC/DHX58/CD300A/LGALS9/VAMP8/IL1B/PTPRJ/CD1D/FCER1G/NFKBID/LAG3/TNFRSF14/ADGRE2/UNC13D/RAC2/PTPN22/HMOX1/CD40/CD86/C3/CD84/SEMA7A/PLA2G5/MZB1	43	geneontology_Biological_Process	0.0597222	Up
GO:0050727	regulation of inflammatory response	60/720	425/18866	1.29977e-18	1.17604e-16	8.57479e-17	ALOX5/TNFAIP8L2/BTK/CCR2/HLA-DRB1/PYCARD/GPSM3/CLEC7A/PRKCD/SLAMF8/IL18/CX3CL1/HLA-E/NLRP3/TLR4/IL17RA/HCK/FCGR2B/PIK3AP1/CASP1/PTPRC/SIRPA/S100A9/AKNA/VAMP8/TNFRSF1B/TREM2/IL1B/FCER1G/OSM/HYAL2/TLR2/AOAH/ZYX/MAPK13/SNCA/TEK/ADAM8/CEBPA/PLD4/TNFRSF11A/APO	60	geneontology_Biological_Process	0.0833333	Up
GO:1903555	regulation of tumor necrosis factor superfamily cytokine production	31/720	113/18866	1.69156e-18	1.50166e-16	1.09489e-16	SASH3/PYCARD/VSIR/CD14/CX3CL1/PTAFR/HLA-E/PTPN6/TLR4/CD2/CARD9/ARRB2/CD33/PTPRC/SIRPA/LGALS9/TREM2/PTPRJ/FCER1G/HAVCR2/GAS6/TLR2/CD34/ADAM8/PTPN22/LY96/CLEC4A/CYBA/CCL3/ZFP36/ACP5	31	geneontology_Biological_Process	0.0430556	Up
GO:0097530	granulocyte migration	35/720	150/18866	3.03961e-18	2.6484e-16	1.93101e-16	JAML/CD74/VAV1/SLAMF8/CX3CL1/IL17RA/ITGB2/CSF1R/C3AR1/NCKAP1L/CSF3R/CD300A/S100A9/IL1B/FCER1G/MPP1/CSF1/C5AR1/CCL4/ADGRE2/RAC2/ADAM8/CCL8/CXCL10/CCL2/SLIT2/CCL14/CCL3/S100A8/CXCL2/CXCL9/CCL5/MDK/CXCL11/CCL18	35	geneontology_Biological_Process	0.0486111	Up
GO:0019882	antigen processing and presentation	43/720	232/18866	4.58153e-18	3.91929e-16	2.85765e-16	WAS/NCF4/CD209/NCF1/HLA-DMB/HLA-DRB1/FGL2/CD74/PYCARD/CYBB/HLA-DPA1/HLA-DMA/LILRB2/HLA-DPB1/HLA-DRB5/CTSS/HLA-E/FCGR2B/HLA-DOA/FCGR1B/HLA-DRA/VAMP8/HLA-DQA1/TREM2/CD1D/FCER1G/HLA-DQB1/NCF2/FCGR1A/LAG3/CD68/PSAP/IFI30/TAPBPL/ICAM1/SLC11A1/CLEC4A/PSMB9/CYBA	43	geneontology_Biological_Process	0.0597222	Up
GO:0032680	regulation of tumor necrosis factor production	30/720	110/18866	7.26971e-18	6.10785e-16	4.45338e-16	SASH3/PYCARD/VSIR/CD14/CX3CL1/PTAFR/HLA-E/PTPN6/TLR4/CD2/CARD9/ARRB2/CD33/PTPRC/SIRPA/LGALS9/TREM2/PTPRJ/FCER1G/HAVCR2/GAS6/TLR2/CD34/PTPN22/LY96/CLEC4A/CYBA/CCL3/ZFP36/ACP5	30	geneontology_Biological_Process	0.0416667	Up
GO:0071621	granulocyte chemotaxis	32/720	127/18866	7.52104e-18	6.20816e-16	4.52651e-16	JAML/CD74/VAV1/CX3CL1/IL17RA/ITGB2/CSF1R/C3AR1/NCKAP1L/CSF3R/S100A9/IL1B/FCER1G/MPP1/CSF1/C5AR1/CCL4/ADGRE2/RAC2/CCL8/CXCL10/CCL2/SLIT2/CCL14/CCL3/S100A8/CXCL2/CXCL9/CCL5/MDK/CXCL11/CCL18	32	geneontology_Biological_Process	0.0444444	Up
GO:0071706	tumor necrosis factor superfamily cytokine production	31/720	119/18866	8.72112e-18	7.07463e-16	5.15828e-16	SASH3/PYCARD/VSIR/CD14/CX3CL1/PTAFR/HLA-E/PTPN6/TLR4/CD2/CARD9/ARRB2/CD33/PTPRC/SIRPA/LGALS9/TREM2/PTPRJ/FCER1G/HAVCR2/GAS6/TLR2/CD34/ADAM8/PTPN22/LY96/CLEC4A/CYBA/CCL3/ZFP36/ACP5	31	geneontology_Biological_Process	0.0430556	Up
GO:0032640	tumor necrosis factor production	30/720	116/18866	3.69402e-17	2.94582e-15	2.14787e-15	SASH3/PYCARD/VSIR/CD14/CX3CL1/PTAFR/HLA-E/PTPN6/TLR4/CD2/CARD9/ARRB2/CD33/PTPRC/SIRPA/LGALS9/TREM2/PTPRJ/FCER1G/HAVCR2/GAS6/TLR2/CD34/PTPN22/LY96/CLEC4A/CYBA/CCL3/ZFP36/ACP5	30	geneontology_Biological_Process	0.0416667	Up
GO:0030593	neutrophil chemotaxis	28/720	103/18866	1.01061e-16	7.92484e-15	5.77819e-15	JAML/CD74/VAV1/CX3CL1/ITGB2/C3AR1/NCKAP1L/CSF3R/S100A9/IL1B/FCER1G/MPP1/C5AR1/CCL4/RAC2/CCL8/CXCL10/CCL2/SLIT2/CCL14/CCL3/S100A8/CXCL2/CXCL9/CCL5/MDK/CXCL11/CCL18	28	geneontology_Biological_Process	0.0388889	Up
GO:0030217	T cell differentiation	43/720	253/18866	1.28877e-16	9.94041e-15	7.24779e-15	RIPK3/DOCK2/SASH3/CCR2/FGL2/CD74/LILRB2/VSIR/CD4/VAV1/IL18/NLRP3/ZAP70/LILRB4/CD2/CD3E/LCK/HLA-DOA/SEMA4A/NCKAP1L/JAK3/PTPRC/CD3D/LGALS9/IL1B/CD1D/FCER1G/NFKBID/LAG3/CD27/PSAP/ADAM8/CLEC4E/PTPN22/IRF1/CD86/TGFBR2/BATF/CD8A/TCIRG1/LFNG/MDK/EGR1	43	geneontology_Biological_Process	0.0597222	Up
GO:1902107	positive regulation of leukocyte differentiation	34/720	159/18866	1.62775e-16	1.23525e-14	9.00649e-15	SASH3/BTK/FES/HLA-DRB1/HCLS1/CD74/LILRB2/VSIR/CD4/IL18/INPP5D/NLRP3/ZAP70/LILRB4/NCKAP1L/TYROBP/PTPRC/LGALS9/TREM2/IL1B/NFKBID/GAS6/CSF1/EVI2B/CD27/ADAM8/CD86/TGFBR2/CCR1/GPR68/LIF/MDK/FOS/DCSTAMP	34	geneontology_Biological_Process	0.0472222	Up
GO:1990266	neutrophil migration	30/720	122/18866	1.68597e-16	1.25913e-14	9.18058e-15	JAML/CD74/VAV1/SLAMF8/CX3CL1/ITGB2/C3AR1/NCKAP1L/CSF3R/S100A9/IL1B/FCER1G/MPP1/C5AR1/CCL4/RAC2/ADAM8/CCL8/CXCL10/CCL2/SLIT2/CCL14/CCL3/S100A8/CXCL2/CXCL9/CCL5/MDK/CXCL11/CCL18	30	geneontology_Biological_Process	0.0416667	Up
GO:0071219	cellular response to molecule of bacterial origin	40/720	222/18866	1.90097e-16	1.39751e-14	1.01896e-14	IRF8/PYCARD/LILRB2/LY86/IL18/LILRB1/CD14/CX3CL1/PTAFR/NLRP3/TLR4/HCK/FCGR2B/CASP1/SIRPA/TNFRSF1B/TREM2/IL1B/CCR5/HAVCR2/TLR2/TLR1/SIGIRR/LILRA2/CD68/PTPN22/CXCL10/CCL2/LY96/CD40/CD86/ICAM1/CX3CR1/CCL3/ZFP36/CXCL2/CXCL9/CCL5/CXCL11/LDOC1	40	geneontology_Biological_Process	0.0555556	Up
GO:0071216	cellular response to biotic stimulus	42/720	246/18866	2.48307e-16	1.79736e-14	1.3105e-14	BTK/IRF8/PYCARD/CLEC7A/LILRB2/LY86/IL18/LILRB1/CD14/CX3CL1/PTAFR/NLRP3/TLR4/HCK/FCGR2B/CASP1/SIRPA/TNFRSF1B/TREM2/IL1B/CCR5/HAVCR2/TLR2/TLR1/SIGIRR/LILRA2/CD68/PTPN22/CXCL10/CCL2/LY96/CD40/CD86/ICAM1/CX3CR1/CCL3/ZFP36/CXCL2/CXCL9/CCL5/CXCL11/LDOC1	42	geneontology_Biological_Process	0.0583333	Up
GO:0072676	lymphocyte migration	29/720	117/18866	4.29284e-16	3.06027e-14	2.23132e-14	RIPK3/CCR2/DOCK8/AIF1/MYO1G/PYCARD/CX3CL1/PTK2B/ZAP70/ITGAL/GAS6/CXCL16/CCL4/TNFRSF14/ADAM8/CCL8/CXCL10/CCL2/HSD3B7/F11R/S1PR1/ICAM1/CXCL12/CCL14/CCL3/CD200/CCL5/CXCL11/CCL18	29	geneontology_Biological_Process	0.0402778	Up
GO:0030099	myeloid cell differentiation	56/720	431/18866	8.29208e-16	5.82302e-14	4.2457e-14	FES/IRF8/HLA-DRB1/HCLS1/CD74/C1QC/CD4/RASGRP4/LILRB1/IKZF1/INPP5D/PTK2B/PTPN6/NRROS/TLR4/LILRB4/CSF1R/NCKAP1L/TYROBP/CSF3R/JAK3/SPI1/TREM2/FCER1G/TLR2/RASSF2/CSF1/NBEAL2/SH2B3/BATF3/CLEC5A/ZNF385A/EVI2B/CEBPA/TNFRSF11A/JAG1/RHEX/TGFBR2/CCR1/GPR68/EPAS1/BA	56	geneontology_Biological_Process	0.0777778	Up
GO:0002573	myeloid leukocyte differentiation	38/720	210/18866	9.42531e-16	6.52149e-14	4.75497e-14	FES/HLA-DRB1/HCLS1/CD74/C1QC/CD4/LILRB1/INPP5D/NRROS/TLR4/LILRB4/CSF1R/TYROBP/SPI1/TREM2/FCER1G/TLR2/RASSF2/CSF1/BATF3/EVI2B/CEBPA/TNFRSF11A/TGFBR2/CCR1/GPR68/BATF/GPR137B/OSCAR/CCL3/IRF7/TCIRG1/LIF/BGLAP/SNX10/FOS/SIGLEC15/DCSTAMP	38	geneontology_Biological_Process	0.0527778	Up
GO:0002886	regulation of myeloid leukocyte mediated immunity	21/720	58/18866	1.08841e-15	7.42167e-14	5.41131e-14	BTK/ITGAM/CCR2/FES/PTAFR/HLA-E/STXBP2/FGR/ITGB2/FCGR2B/TYROBP/CD300A/LGALS9/VAMP8/FCER1G/ADGRE2/UNC13D/RAC2/HMOX1/C3/CD84	21	geneontology_Biological_Process	0.0291667	Up
GO:0002685	regulation of leukocyte migration	38/720	212/18866	1.30311e-15	8.75878e-14	6.38623e-14	RIPK3/CCR2/DOCK8/AIF1/CD74/PYCARD/GPSM3/SLAMF8/CX3CL1/PTAFR/PTK2B/CSF1R/C3AR1/NCKAP1L/CD300A/LGALS9/TREM2/GAS6/MPP1/CSF1/C5AR1/CCL4/TNFRSF14/RAC2/ADAM8/CCL8/HMOX1/CXCL10/CCL2/ICAM1/CX3CR1/SLIT2/CXCL12/CCR1/CCL3/CD200/CCL5/MDK	38	geneontology_Biological_Process	0.0527778	Up
GO:0031349	positive regulation of defense response	52/720	385/18866	1.84886e-15	1.2252e-13	8.9332e-14	CD209/CLEC10A/BTK/CCR2/PYCARD/GPSM3/CLEC7A/VAV1/PRKCD/IL18/CX3CL1/HLA-E/TLR4/FCN1/IL17RA/HCK/MNDA/CARD9/DHX58/S100A9/VAMP8/TREM2/IL1B/CD1D/FCER1G/HAVCR2/OSM/HYAL2/TLR2/LAG3/LILRA2/MAPK13/SNCA/ADAM8/CLEC4E/CEBPA/TNFRSF11A/C3/NLRC5/CLEC4A/PSMB9/CYBA/GRN/CCL	52	geneontology_Biological_Process	0.0722222	Up
GO:1903708	positive regulation of hemopoiesis	37/720	204/18866	2.09608e-15	1.36973e-13	9.98702e-14	SASH3/BTK/FES/HLA-DRB1/HCLS1/CD74/LILRB2/VSIR/CD4/IL18/INPP5D/NLRP3/ZAP70/LILRB4/NCKAP1L/TYROBP/PTPRC/LGALS9/TREM2/IL1B/NFKBID/GAS6/CSF1/EVI2B/CD27/ADAM8/JAG1/RHEX/CD86/TGFBR2/CCR1/GPR68/LIF/MDK/FOS/DCSTAMP/SCIN	37	geneontology_Biological_Process	0.0513889	Up
GO:0071222	cellular response to lipopolysaccharide	37/720	208/18866	3.99691e-15	2.57609e-13	1.87829e-13	IRF8/PYCARD/LILRB2/LY86/IL18/LILRB1/CD14/CX3CL1/PTAFR/NLRP3/TLR4/HCK/CASP1/SIRPA/TNFRSF1B/IL1B/CCR5/HAVCR2/TLR2/SIGIRR/LILRA2/CD68/PTPN22/CXCL10/CCL2/LY96/CD40/CD86/ICAM1/CX3CR1/CCL3/ZFP36/CXCL2/CXCL9/CCL5/CXCL11/LDOC1	37	geneontology_Biological_Process	0.0513889	Up
GO:0070374	positive regulation of ERK1 and ERK2 cascade	37/720	215/18866	1.1889e-14	7.55913e-13	5.51154e-13	HLA-DRB1/CD74/PYCARD/CD4/P2RY6/CX3CL1/PTK2B/TLR4/CSF1R/ARRB2/RAMP3/PTPRC/LGALS9/CFLAR/TREM2/HAVCR2/GAS6/C5AR1/CCL4/PDGFB/TEK/CCL8/PTPN22/TNFRSF11A/CCL2/APOE/MARCO/ICAM1/CCR1/NDRG4/CCL14/SEMA7A/CCL3/PLA2G5/CCL5/CCN2/CCL18	37	geneontology_Biological_Process	0.0513889	Up
GO:0002687	positive regulation of leukocyte migration	30/720	142/18866	1.40756e-14	8.83007e-13	6.43821e-13	CCR2/DOCK8/AIF1/CD74/PYCARD/GPSM3/CX3CL1/PTAFR/PTK2B/CSF1R/C3AR1/NCKAP1L/LGALS9/TREM2/GAS6/CSF1/C5AR1/CCL4/TNFRSF14/RAC2/ADAM8/CCL8/CXCL10/ICAM1/CX3CR1/CXCL12/CCR1/CCL3/CCL5/MDK	30	geneontology_Biological_Process	0.0416667	Up
GO:0048002	antigen processing and presentation of peptide antigen	35/720	194/18866	1.43373e-14	8.87595e-13	6.47167e-13	NCF4/CD209/NCF1/HLA-DMB/HLA-DRB1/CD74/PYCARD/CYBB/HLA-DPA1/HLA-DMA/HLA-DPB1/HLA-DRB5/CTSS/HLA-E/FCGR2B/HLA-DOA/FCGR1B/HLA-DRA/VAMP8/HLA-DQA1/TREM2/FCER1G/HLA-DQB1/NCF2/FCGR1A/LAG3/IFI30/TAPBPL/SLC11A1/CLEC4A/PSMB9/CYBA/HLA-DQB2/HLA-C/HLA-DQA2	35	geneontology_Biological_Process	0.0486111	Up
GO:0051250	negative regulation of lymphocyte activation	31/720	154/18866	2.08485e-14	1.27393e-12	9.2885e-13	TNFAIP8L2/BTK/HLA-DRB1/FGL2/VSIG4/CD74/LILRB2/PARP3/VSIR/LILRB1/LST1/INPP5D/TBC1D10C/PTPN6/FGR/FCGR2B/MNDA/SAMSN1/TYROBP/JAK3/CD300A/LGALS9/NFKBID/HAVCR2/LAG3/TNFRSF14/MERTK/PTPN22/IRF1/CD86/MDK	31	geneontology_Biological_Process	0.0430556	Up
GO:0072678	T cell migration	21/720	67/18866	3.05503e-14	1.84281e-12	1.34364e-12	RIPK3/CCR2/DOCK8/AIF1/MYO1G/PYCARD/ZAP70/ITGAL/CXCL16/TNFRSF14/ADAM8/CXCL10/CCL2/F11R/S1PR1/ICAM1/CXCL12/CCL3/CD200/CCL5/CXCL11	21	geneontology_Biological_Process	0.0291667	Up
GO:0002819	regulation of adaptive immune response	32/720	168/18866	4.04907e-14	2.4115e-12	1.75828e-12	RIPK3/SASH3/WAS/BTK/CCR2/PYCARD/TNFSF13/PARP3/CD4/IL18/LILRB1/HLA-E/PTPN6/NLRP3/FCGR2B/SAMSN1/JAK3/PTPRC/TNFRSF1B/IL1B/CD1D/FCER1G/NFKBID/HAVCR2/TNFSF13B/TNFRSF14/CD48/IRF1/CD40/SLC11A1/C3/IRF7	32	geneontology_Biological_Process	0.0444444	Up
GO:0042116	macrophage activation	25/720	101/18866	4.80624e-14	2.82667e-12	2.06099e-12	ITGAM/C1QA/AIF1/VSIG4/CD74/CX3CL1/TLR4/ITGB2/FCGR2B/TYROBP/PTPRC/TREM2/HAVCR2/TLR2/C5AR1/TLR1/CD93/SNCA/CEBPA/SLC11A1/GRN/GPR137B/CCL3/CD200/CST7	25	geneontology_Biological_Process	0.0347222	Up
GO:0070371	ERK1 and ERK2 cascade	45/720	325/18866	6.21988e-14	3.61291e-12	2.63426e-12	HLA-DRB1/CD74/PYCARD/CD4/P2RY6/CX3CL1/PTK2B/TBC1D10C/PTPN6/TLR4/CSF1R/ARRB2/SULT1A4/RAMP3/PTPRC/SIRPA/LGALS9/CFLAR/TREM2/IL1B/HAVCR2/GAS6/C5AR1/CCL4/PDGFB/TEK/CCL8/PTPN22/TNFRSF11A/CCL2/APOE/MARCO/ICAM1/CCR1/NDRG4/CCL14/SEMA7A/CCL3/PLA2G5/LIF/CCL5/CCN2/CC	45	geneontology_Biological_Process	0.0625	Up
GO:0070372	regulation of ERK1 and ERK2 cascade	43/720	306/18866	1.35609e-13	7.78101e-12	5.67331e-12	HLA-DRB1/CD74/PYCARD/CD4/P2RY6/CX3CL1/PTK2B/TBC1D10C/PTPN6/TLR4/CSF1R/ARRB2/RAMP3/PTPRC/SIRPA/LGALS9/CFLAR/TREM2/IL1B/HAVCR2/GAS6/C5AR1/CCL4/PDGFB/TEK/CCL8/PTPN22/TNFRSF11A/CCL2/APOE/MARCO/ICAM1/CCR1/NDRG4/CCL14/SEMA7A/CCL3/PLA2G5/LIF/CCL5/CCN2/CCL18/GBP1	43	geneontology_Biological_Process	0.0597222	Up
GO:0071674	mononuclear cell migration	24/720	97/18866	1.56195e-13	8.82276e-12	6.43288e-12	JAML/CCR2/AIF1/SLAMF8/CX3CL1/CSF1R/C3AR1/SIRPA/CSF1/C5AR1/CCL4/PDGFB/CCL8/TNFRSF11A/CXCL10/CCL2/SLIT2/CXCL12/CCR1/CCL14/CCL3/CCL5/MDK/CCL18	24	geneontology_Biological_Process	0.0333333	Up
GO:0002285	lymphocyte activation involved in immune response	33/720	187/18866	1.57516e-13	8.82276e-12	6.43288e-12	MFNG/CORO1A/HLA-DMB/FGL2/CD74/TNFSF13/PARP3/IL18/LILRB1/PTK2B/NLRP3/TLR4/FCGR2B/ITGAL/SEMA4A/JAK3/PTPRC/LCP1/LGALS9/FCER1G/NFKBID/HAVCR2/UNC13D/APBB1IP/CLEC4E/CD40/CD86/ICAM1/SLC11A1/BATF/ITM2A/LFNG/MDK	33	geneontology_Biological_Process	0.0458333	Up
GO:0006959	humoral immune response	48/720	377/18866	2.21518e-13	1.22617e-11	8.94028e-12	ALOX5/CCR2/HLA-DRB1/C1QA/LYZ/VSIG4/C1QB/CFI/BLNK/C1QC/HLA-E/PTPN6/FCN1/FCGR2B/ST6GAL1/C3AR1/PTPRC/S100A9/RNASE6/TREM2/IL1B/HLA-DQB1/EBI3/PLA2G6/C5AR1/SERPING1/JCHAIN/C1RL/CXCL10/CCL2/POU2F2/IGLL5/SLC11A1/C3/C4B/C2/S100A8/C4A/CFB/GNLY/TREM1/CXCL2/C1R/CXCL9	48	geneontology_Biological_Process	0.0666667	Up
GO:0032102	negative regulation of response to external stimulus	52/720	433/18866	2.25385e-13	1.23307e-11	8.99058e-12	ALOX5/TNFAIP8L2/HLA-DRB1/FGL2/AIF1/VSIG4/PYCARD/PRKCD/SLAMF8/LILRB1/CX3CL1/HLA-E/NLRP3/FCGR2B/SEMA4A/ARRB2/PTPRC/DHX58/SIRPA/LGALS9/TNFRSF1B/HAVCR2/SEMA3G/AOAH/SH2B3/SIGIRR/PDGFB/SERPING1/LILRA2/TEK/SAMHD1/CD34/CCL2/APOE/CDH5/SLIT2/NLRC5/FNDC4/GPX1/THBD/G	52	geneontology_Biological_Process	0.0722222	Up
GO:0072593	reactive oxygen species metabolic process	41/720	288/18866	3.27882e-13	1.7671e-11	1.28843e-11	RIPK3/ALOX5/NCF4/ITGAM/NCF1/AIF1/CYBB/CLEC7A/VAV1/PRKCD/PTK2B/NRROS/TLR4/ITGB2/TYROBP/SIRPA/CFLAR/IL1B/TLR2/NCF2/PDGFB/SNCA/CD34/HBA2/RAC2/HBB/HBA1/PON3/TGFBR2/ICAM1/CX3CR1/GPX1/CYBA/MAOB/HBG2/IFI6/CCN2/GPX3/PTX3/ACP5/AGT	41	geneontology_Biological_Process	0.0569444	Up
GO:0032675	regulation of interleukin-6 production	30/720	159/18866	3.30509e-13	1.7671e-11	1.28843e-11	AIF1/CD74/PYCARD/CLEC7A/LILRB2/CX3CL1/PTPN6/TLR4/IL17RA/NCKAP1L/CARD9/ARRB2/TYROBP/SIRPA/LGALS9/TREM2/IL1B/FCER1G/HAVCR2/GAS6/HYAL2/TLR2/TLR1/LILRA2/MAPK13/PTPN22/POU2F2/CYBA/CD200/HGF	30	geneontology_Biological_Process	0.0416667	Up
GO:0032635	interleukin-6 production	31/720	170/18866	3.47028e-13	1.83457e-11	1.33763e-11	AIF1/CD74/PYCARD/CLEC7A/LILRB2/IL18/CX3CL1/PTPN6/TLR4/IL17RA/NCKAP1L/CARD9/ARRB2/TYROBP/SIRPA/LGALS9/TREM2/IL1B/FCER1G/HAVCR2/GAS6/HYAL2/TLR2/TLR1/LILRA2/MAPK13/PTPN22/POU2F2/CYBA/CD200/HGF	31	geneontology_Biological_Process	0.0430556	Up
GO:0043300	regulation of leukocyte degranulation	17/720	47/18866	6.02212e-13	3.14823e-11	2.29545e-11	ITGAM/CCR2/FES/PTAFR/STXBP2/FGR/ITGB2/FCGR2B/CD300A/LGALS9/VAMP8/FCER1G/ADGRE2/UNC13D/RAC2/HMOX1/CD84	17	geneontology_Biological_Process	0.0236111	Up
GO:0006968	cellular defense response	18/720	54/18866	6.39129e-13	3.30451e-11	2.40939e-11	CCR2/NCF1/LILRB2/PTK2B/MNDA/TYROBP/CCR5/NCF2/C5AR1/CLEC5A/LY96/CD300C/CX3CR1/PRF1/TCIRG1/GNLY/CXCL9/LGALS3BP	18	geneontology_Biological_Process	0.025	Up
GO:0045088	regulation of innate immune response	42/720	307/18866	6.56393e-13	3.35688e-11	2.44758e-11	CD209/CLEC10A/VSIG4/PYCARD/VAV1/PRKCD/SLAMF8/LILRB1/HLA-E/PTPN6/TLR4/FCN1/HCK/FGR/FCGR2B/MNDA/CARD9/ARRB2/DHX58/LGALS9/TREM2/CD1D/FCER1G/HAVCR2/LAG3/SERPING1/LILRA2/SAMHD1/ADAM8/CLEC4E/PTPN22/IRF1/APOE/NLRC5/CLEC4A/PSMB9/GRN/IRF7/SOCS3/PLA2G5/MUC15/CCL5	42	geneontology_Biological_Process	0.0583333	Up
GO:0032649	regulation of interferon-gamma production	24/720	104/18866	8.11474e-13	4.10536e-11	2.99332e-11	RIPK3/SASH3/CCR2/IRF8/HLA-DRB1/PYCARD/HLA-DPA1/CLEC7A/VSIR/HLA-DPB1/IL18/LILRB1/CD14/TLR4/CD2/CD3E/SIRPA/LGALS9/IL1B/HAVCR2/GAS6/EBI3/PTPN22/SLC11A1	24	geneontology_Biological_Process	0.0333333	Up
GO:0046633	alpha-beta T cell proliferation	15/720	36/18866	1.21325e-12	6.0727e-11	4.42775e-11	DOCK2/CCR2/RASAL3/VSIR/IL18/HLA-E/ZAP70/CD3E/PTPRC/LGALS9/EBI3/TNFRSF14/PTPN22/IRF1/TGFBR2	15	geneontology_Biological_Process	0.0208333	Up
GO:0048771	tissue remodeling	31/720	178/18866	1.24319e-12	6.09524e-11	4.44418e-11	CCR2/IL18/INPP5D/PTK2B/CSF1R/ACVRL1/RASSF2/GJA5/RAC2/ADAM8/TNFRSF11A/JAG1/CST3/S1PR1/LTBP3/HOXA3/EPAS1/GPR137B/SPP1/TCIRG1/TGM2/LIF/BGLAP/SNX10/MDK/SIGLEC15/DCSTAMP/ACP5/AGT/ITGB3/CTSK	31	geneontology_Biological_Process	0.0430556	Up
GO:0002831	regulation of response to biotic stimulus	49/720	409/18866	1.24366e-12	6.09524e-11	4.44418e-11	CD209/CLEC10A/FGL2/VSIG4/PYCARD/LY86/VAV1/PRKCD/SLAMF8/LILRB1/CX3CL1/HLA-E/PTPN6/TLR4/FCN1/HCK/FGR/FCGR2B/MNDA/CARD9/ARRB2/DHX58/LGALS9/TREM2/IL1B/CD1D/FCER1G/HAVCR2/LAG3/SIGIRR/SERPING1/LILRA2/SAMHD1/ADAM8/CLEC4E/PTPN22/IRF1/APOE/LY96/NLRC5/CLEC4A/PSMB9/	49	geneontology_Biological_Process	0.0680556	Up
GO:0046631	alpha-beta T cell activation	28/720	146/18866	1.34376e-12	6.51793e-11	4.75238e-11	DOCK2/SASH3/CCR2/RASAL3/VSIR/IL18/LILRB1/HLA-E/NLRP3/ZAP70/CD3E/SEMA4A/NCKAP1L/JAK3/PTPRC/CD300A/LGALS9/NFKBID/EBI3/TNFRSF14/PSAP/PTPN22/IRF1/CD86/TGFBR2/CLEC4A/BATF/TCIRG1	28	geneontology_Biological_Process	0.0388889	Up
GO:0042113	B cell activation	43/720	328/18866	1.50955e-12	7.24736e-11	5.28422e-11	MFNG/SASH3/BTK/NFAM1/CD74/LYL1/BLNK/TNFSF13/PARP3/CD22/PRKCD/SLAMF8/INPP5D/PTK2B/TBC1D10C/PTPN6/TLR4/ZAP70/FCGR2B/MNDA/SAMSN1/NCKAP1L/LAT2/TYROBP/JAK3/PTPRC/CD300A/HHEX/PTPRJ/TNFSF13B/CD79A/CD27/CD40/CD86/POU2F2/IGLL5/BATF/ITM2A/BST2/TCIRG1/LFNG/VCAM1/MZB	43	geneontology_Biological_Process	0.0597222	Up
GO:0050729	positive regulation of inflammatory response	29/720	158/18866	1.69929e-12	8.07592e-11	5.88834e-11	BTK/CCR2/GPSM3/CLEC7A/IL18/CX3CL1/HLA-E/TLR4/IL17RA/S100A9/VAMP8/TREM2/IL1B/FCER1G/OSM/HYAL2/TLR2/MAPK13/SNCA/ADAM8/CEBPA/TNFRSF11A/C3/GRN/CCL3/S100A8/TGM2/MDK/AGT	29	geneontology_Biological_Process	0.0402778	Up
GO:0045619	regulation of lymphocyte differentiation	31/720	181/18866	1.96668e-12	9.25325e-11	6.74676e-11	SASH3/BTK/NFAM1/CCR2/FGL2/CD74/LILRB2/VSIR/SLAMF8/IL18/INPP5D/PTPN6/NLRP3/ZAP70/LILRB4/CD2/HLA-DOA/NCKAP1L/JAK3/PTPRC/LGALS9/IL1B/NFKBID/GAS6/LAG3/CD27/ADAM8/IRF1/CD86/TGFBR2/MDK	31	geneontology_Biological_Process	0.0430556	Up
GO:0043277	apoptotic cell clearance	17/720	51/18866	2.81233e-12	1.3101e-10	9.55226e-11	CCR2/CD300LF/FCN1/TYROBP/TREM2/GAS6/RAC2/MERTK/CCL2/MARCO/C3/C4B/C2/MFGE8/C4A/TGM2/ITGB3	17	geneontology_Biological_Process	0.0236111	Up
GO:0019884	antigen processing and presentation of exogenous antigen	31/720	185/18866	3.56825e-12	1.64594e-10	1.2001e-10	NCF4/NCF1/HLA-DMB/HLA-DRB1/CD74/CYBB/HLA-DPA1/HLA-DMA/HLA-DPB1/HLA-DRB5/CTSS/HLA-E/FCGR2B/HLA-DOA/FCGR1B/HLA-DRA/VAMP8/HLA-DQA1/CD1D/FCER1G/HLA-DQB1/NCF2/FCGR1A/LAG3/IFI30/CLEC4A/PSMB9/CYBA/HLA-DQB2/HLA-C/HLA-DQA2	31	geneontology_Biological_Process	0.0430556	Up
GO:0050851	antigen receptor-mediated signaling pathway	42/720	325/18866	4.45092e-12	2.03316e-10	1.48243e-10	WAS/BTK/NFAM1/HLA-DRB1/LCP2/HLA-DPA1/BLNK/HLA-DPB1/CD22/CD4/HLA-DRB5/INPP5D/PTPN6/ZAP70/LILRB4/FCGR2B/CD3E/MNDA/LCK/NCKAP1L/LAT2/HLA-DRA/PTPRC/CD300A/CD3D/HLA-DQA1/PTPRJ/LPXN/NFKBID/HLA-DQB1/FYB1/PRKCH/CD247/CD79A/THEMIS2/PTPN22/LAT/IGLL5/PSMB9/HLA-DQB2/H	42	geneontology_Biological_Process	0.0583333	Up
GO:0046640	regulation of alpha-beta T cell proliferation	14/720	33/18866	5.12758e-12	2.31974e-10	1.69137e-10	CCR2/RASAL3/VSIR/IL18/HLA-E/ZAP70/CD3E/PTPRC/LGALS9/EBI3/TNFRSF14/PTPN22/IRF1/TGFBR2	14	geneontology_Biological_Process	0.0194444	Up
GO:0002761	regulation of myeloid leukocyte differentiation	25/720	123/18866	5.60093e-12	2.50975e-10	1.82992e-10	FES/HLA-DRB1/HCLS1/CD74/C1QC/CD4/LILRB1/INPP5D/TLR4/LILRB4/TYROBP/TREM2/RASSF2/CSF1/EVI2B/CCR1/GPR68/GPR137B/CCL3/IRF7/LIF/BGLAP/FOS/SIGLEC15/DCSTAMP	25	geneontology_Biological_Process	0.0347222	Up
GO:0002478	antigen processing and presentation of exogenous peptide antigen	30/720	177/18866	5.90578e-12	2.62139e-10	1.91131e-10	NCF4/NCF1/HLA-DMB/HLA-DRB1/CD74/CYBB/HLA-DPA1/HLA-DMA/HLA-DPB1/HLA-DRB5/CTSS/HLA-E/FCGR2B/HLA-DOA/FCGR1B/HLA-DRA/VAMP8/HLA-DQA1/FCER1G/HLA-DQB1/NCF2/FCGR1A/LAG3/IFI30/CLEC4A/PSMB9/CYBA/HLA-DQB2/HLA-C/HLA-DQA2	30	geneontology_Biological_Process	0.0416667	Up
GO:0045576	mast cell activation	18/720	61/18866	6.73303e-12	2.96064e-10	2.15868e-10	BTK/FES/LCP2/CD300LF/STXBP2/FGR/LAT2/CD300A/LGALS9/VAMP8/FCER1G/ADGRE2/UNC13D/RAC2/HMOX1/LAT/MILR1/CD84	18	geneontology_Biological_Process	0.025	Up
GO:0032609	interferon-gamma production	24/720	115/18866	8.20581e-12	3.57485e-10	2.6065e-10	RIPK3/SASH3/CCR2/IRF8/HLA-DRB1/PYCARD/HLA-DPA1/CLEC7A/VSIR/HLA-DPB1/IL18/LILRB1/CD14/TLR4/CD2/CD3E/SIRPA/LGALS9/IL1B/HAVCR2/GAS6/EBI3/PTPN22/SLC11A1	24	geneontology_Biological_Process	0.0333333	Up
GO:0043303	mast cell degranulation	16/720	47/18866	8.55399e-12	3.69234e-10	2.69218e-10	BTK/FES/STXBP2/FGR/LAT2/CD300A/LGALS9/VAMP8/FCER1G/ADGRE2/UNC13D/RAC2/HMOX1/LAT/MILR1/CD84	16	geneontology_Biological_Process	0.0222222	Up
GO:0018108	peptidyl-tyrosine phosphorylation	45/720	374/18866	9.14061e-12	3.90969e-10	2.85065e-10	BTK/NCF1/FES/HCLS1/CD74/CD4/PRKCD/IL18/PTK2B/PTPN6/ZAP70/HCK/FGR/ITGB2/CD3E/CSF1R/SAMSN1/LCK/ARRB2/JAK3/PTPRC/CD300A/TREM2/PTPRJ/GAS6/OSM/HYAL2/FCGR1A/SH2B3/SLA/TNFRSF14/PDGFB/TEK/MERTK/CD40/ICAM1/MVP/TIE1/NEDD9/SOCS3/LIF/CCL5/HGF/AGT/ITGB3	45	geneontology_Biological_Process	0.0625	Up
GO:0046634	regulation of alpha-beta T cell activation	22/720	97/18866	1.05874e-11	4.4083e-10	3.21419e-10	SASH3/CCR2/RASAL3/VSIR/IL18/LILRB1/HLA-E/NLRP3/ZAP70/CD3E/NCKAP1L/JAK3/PTPRC/CD300A/LGALS9/NFKBID/EBI3/TNFRSF14/PTPN22/IRF1/CD86/TGFBR2	22	geneontology_Biological_Process	0.0305556	Up
GO:1990868	response to chemokine	22/720	97/18866	1.05874e-11	4.4083e-10	3.21419e-10	CCR2/DOCK8/CX3CL1/PTK2B/TREM2/CCR5/CCL4/SH2B3/CCL8/CXCL10/CCL2/CX3CR1/SLIT2/CXCL12/CCR1/CCL14/CCL3/CXCL2/CXCL9/CCL5/CXCL11/CCL18	22	geneontology_Biological_Process	0.0305556	Up
GO:1990869	cellular response to chemokine	22/720	97/18866	1.05874e-11	4.4083e-10	3.21419e-10	CCR2/DOCK8/CX3CL1/PTK2B/TREM2/CCR5/CCL4/SH2B3/CCL8/CXCL10/CCL2/CX3CR1/SLIT2/CXCL12/CCR1/CCL14/CCL3/CXCL2/CXCL9/CCL5/CXCL11/CCL18	22	geneontology_Biological_Process	0.0305556	Up
GO:0050920	regulation of chemotaxis	34/720	229/18866	1.07996e-11	4.45721e-10	3.24986e-10	CCR2/AIF1/CD74/GPSM3/SLAMF8/PTK2B/CSF1R/SEMA4A/C3AR1/NCKAP1L/LGALS9/TREM2/GAS6/MPP1/SEMA3G/CSF1/C5AR1/CCL4/PDGFB/RAC2/CXCL10/CCL2/S1PR1/SLIT2/CXCL12/CCR1/F3/SEMA7A/CCL3/SEMA4B/CCL5/MDK/SEMA6D/SMOC2	34	geneontology_Biological_Process	0.0472222	Up
GO:0070098	chemokine-mediated signaling pathway	21/720	88/18866	1.10112e-11	4.50502e-10	3.28471e-10	CCR2/CX3CL1/PTK2B/TREM2/CCR5/CCL4/SH2B3/CCL8/CXCL10/CCL2/CX3CR1/SLIT2/CXCL12/CCR1/CCL14/CCL3/CXCL2/CXCL9/CCL5/CXCL11/CCL18	21	geneontology_Biological_Process	0.0291667	Up
GO:0050777	negative regulation of immune response	28/720	159/18866	1.16533e-11	4.72661e-10	3.44628e-10	CCR2/HLA-DRB1/FGL2/VSIG4/PARP3/SLAMF8/LILRB1/INPP5D/HLA-E/PTPN6/FCGR2B/SAMSN1/ARRB2/JAK3/PTPRC/DHX58/CD300A/LGALS9/HAVCR2/TNFRSF14/SERPING1/SAMHD1/HMOX1/NLRC5/GPX1/CD84/GRN/BST2	28	geneontology_Biological_Process	0.0388889	Up
GO:0018212	peptidyl-tyrosine modification	45/720	377/18866	1.20246e-11	4.83554e-10	3.52571e-10	BTK/NCF1/FES/HCLS1/CD74/CD4/PRKCD/IL18/PTK2B/PTPN6/ZAP70/HCK/FGR/ITGB2/CD3E/CSF1R/SAMSN1/LCK/ARRB2/JAK3/PTPRC/CD300A/TREM2/PTPRJ/GAS6/OSM/HYAL2/FCGR1A/SH2B3/SLA/TNFRSF14/PDGFB/TEK/MERTK/CD40/ICAM1/MVP/TIE1/NEDD9/SOCS3/LIF/CCL5/HGF/AGT/ITGB3	45	geneontology_Biological_Process	0.0625	Up
GO:0002279	mast cell activation involved in immune response	16/720	48/18866	1.23812e-11	4.93672e-10	3.59948e-10	BTK/FES/STXBP2/FGR/LAT2/CD300A/LGALS9/VAMP8/FCER1G/ADGRE2/UNC13D/RAC2/HMOX1/LAT/MILR1/CD84	16	geneontology_Biological_Process	0.0222222	Up
GO:0030316	osteoclast differentiation	22/720	98/18866	1.31695e-11	5.20692e-10	3.79649e-10	LILRB1/INPP5D/TLR4/LILRB4/CSF1R/TYROBP/TREM2/FCER1G/RASSF2/CSF1/TNFRSF11A/CCR1/GPR68/GPR137B/OSCAR/CCL3/TCIRG1/BGLAP/SNX10/FOS/SIGLEC15/DCSTAMP	22	geneontology_Biological_Process	0.0305556	Up
GO:0045453	bone resorption	18/720	64/18866	1.65967e-11	6.50729e-10	4.74461e-10	INPP5D/PTK2B/CSF1R/RAC2/ADAM8/TNFRSF11A/S1PR1/LTBP3/GPR137B/SPP1/TCIRG1/BGLAP/SNX10/SIGLEC15/DCSTAMP/ACP5/ITGB3/CTSK	18	geneontology_Biological_Process	0.025	Up
GO:0002448	mast cell mediated immunity	16/720	49/18866	1.77397e-11	6.89795e-10	5.02946e-10	BTK/FES/STXBP2/FGR/LAT2/CD300A/LGALS9/VAMP8/FCER1G/ADGRE2/UNC13D/RAC2/HMOX1/LAT/MILR1/CD84	16	geneontology_Biological_Process	0.0222222	Up
GO:0032729	positive regulation of interferon-gamma production	18/720	65/18866	2.21452e-11	8.54043e-10	6.22703e-10	SASH3/CCR2/IRF8/PYCARD/HLA-DPA1/CLEC7A/HLA-DPB1/IL18/CD14/TLR4/CD2/CD3E/LGALS9/IL1B/HAVCR2/EBI3/PTPN22/SLC11A1	18	geneontology_Biological_Process	0.025	Up
GO:0002577	regulation of antigen processing and presentation	11/720	20/18866	2.84658e-11	1.08887e-09	7.93923e-10	WAS/FGL2/CD74/PYCARD/LILRB2/FCGR2B/HLA-DOA/TREM2/CD68/TAPBPL/SLC11A1	11	geneontology_Biological_Process	0.0152778	Up
GO:0050921	positive regulation of chemotaxis	26/720	144/18866	3.54652e-11	1.34568e-09	9.81164e-10	CCR2/AIF1/CD74/GPSM3/PTK2B/CSF1R/C3AR1/NCKAP1L/LGALS9/TREM2/GAS6/CSF1/C5AR1/CCL4/PDGFB/RAC2/CXCL10/S1PR1/SLIT2/CXCL12/CCR1/F3/CCL3/CCL5/MDK/SMOC2	26	geneontology_Biological_Process	0.0361111	Up
GO:0045123	cellular extravasation	18/720	67/18866	3.8757e-11	1.45216e-09	1.0588e-09	RIPK3/JAML/CCR2/CX3CL1/PTAFR/ITGB2/SELL/ITGAL/SIRPA/SELPLG/ADAM8/CCL2/F11R/ICAM1/CX3CR1/CXCL12/VCAM1/MDK	18	geneontology_Biological_Process	0.025	Up
GO:0016064	immunoglobulin mediated immune response	33/720	227/18866	3.88888e-11	1.45216e-09	1.0588e-09	BTK/HLA-DRB1/FGL2/C1QA/CD74/C1QB/CFI/TNFSF13/C1QC/PARP3/PRKCD/INPP5D/HLA-E/PTPN6/FCGR2B/PTPRC/FCER1G/HLA-DQB1/SERPING1/C1RL/CD27/CD40/POU2F2/IGLL5/C3/C4B/C2/BATF/IRF7/C4A/TCIRG1/C1R/C1S	33	geneontology_Biological_Process	0.0458333	Up
GO:0002688	regulation of leukocyte chemotaxis	24/720	124/18866	4.42515e-11	1.6394e-09	1.19532e-09	CCR2/AIF1/CD74/GPSM3/SLAMF8/PTK2B/CSF1R/C3AR1/NCKAP1L/LGALS9/GAS6/MPP1/CSF1/C5AR1/CCL4/RAC2/CXCL10/CCL2/SLIT2/CXCL12/CCR1/CCL3/CCL5/MDK	24	geneontology_Biological_Process	0.0333333	Up
GO:0009615	response to virus	42/720	349/18866	4.55126e-11	1.67294e-09	1.21978e-09	RIPK3/IRF5/FGL2/PYCARD/LILRB1/TRIM22/NLRP3/FGR/CARD9/PTPRC/DHX58/RNASE6/LGALS9/IL1B/HYAL2/CCL4/BATF3/UNC13D/NPC2/SAMHD1/CCL8/PTPN22/IRF1/IRF9/CXCL10/CD40/POU2F2/CXCL12/NLRC5/PRF1/OAS1/IFITM2/IRF7/BST2/HYAL1/CXCL9/ACTA2/IFI27/CCL5/IFI6/MX1/GBP1	42	geneontology_Biological_Process	0.0583333	Up
GO:1903557	positive regulation of tumor necrosis factor superfamily cytokine production	16/720	52/18866	4.9335e-11	1.79939e-09	1.31198e-09	SASH3/PYCARD/CD14/PTAFR/HLA-E/TLR4/CD2/CARD9/PTPRC/PTPRJ/FCER1G/TLR2/ADAM8/LY96/CYBA/CCL3	16	geneontology_Biological_Process	0.0222222	Up
GO:0019724	B cell mediated immunity	33/720	230/18866	5.56534e-11	2.01423e-09	1.46862e-09	BTK/HLA-DRB1/FGL2/C1QA/CD74/C1QB/CFI/TNFSF13/C1QC/PARP3/PRKCD/INPP5D/HLA-E/PTPN6/FCGR2B/PTPRC/FCER1G/HLA-DQB1/SERPING1/C1RL/CD27/CD40/POU2F2/IGLL5/C3/C4B/C2/BATF/IRF7/C4A/TCIRG1/C1R/C1S	33	geneontology_Biological_Process	0.0458333	Up
GO:0031348	negative regulation of defense response	36/720	269/18866	5.66641e-11	2.03515e-09	1.48387e-09	ALOX5/TNFAIP8L2/HLA-DRB1/FGL2/VSIG4/PYCARD/PRKCD/SLAMF8/LILRB1/CX3CL1/HLA-E/NLRP3/FCGR2B/ARRB2/PTPRC/DHX58/SIRPA/LGALS9/TNFRSF1B/HAVCR2/AOAH/SERPING1/TEK/SAMHD1/APOE/CDH5/NLRC5/FNDC4/GPX1/GRN/SOCS3/CD200/CST7/MDK/HGF/ACP5	36	geneontology_Biological_Process	0.05	Up
GO:0046641	positive regulation of alpha-beta T cell proliferation	11/720	21/18866	5.77214e-11	2.05742e-09	1.50011e-09	CCR2/RASAL3/IL18/HLA-E/ZAP70/CD3E/PTPRC/LGALS9/EBI3/PTPN22/TGFBR2	11	geneontology_Biological_Process	0.0152778	Up
GO:0002286	T cell activation involved in immune response	22/720	109/18866	1.21451e-10	4.29643e-09	3.13263e-09	HLA-DMB/FGL2/CD74/IL18/LILRB1/NLRP3/FCGR2B/ITGAL/SEMA4A/JAK3/LCP1/LGALS9/FCER1G/NFKBID/HAVCR2/APBB1IP/CLEC4E/CD86/ICAM1/SLC11A1/BATF/MDK	22	geneontology_Biological_Process	0.0305556	Up
GO:0032613	interleukin-10 production	17/720	63/18866	1.25576e-10	4.40921e-09	3.21486e-09	SASH3/HLA-DRB1/PYCARD/CLEC7A/VSIR/PRKCD/LILRB1/TLR4/FCGR2B/TYROBP/JAK3/LGALS9/TREM2/FCER1G/TLR2/CD34/HGF	17	geneontology_Biological_Process	0.0236111	Up
GO:0002822	regulation of adaptive immune response based on somatic recombination of immune receptors built from immunoglobulin superfamily domains	26/720	153/18866	1.44077e-10	5.02135e-09	3.66119e-09	RIPK3/SASH3/WAS/BTK/CCR2/TNFSF13/PARP3/CD4/IL18/LILRB1/HLA-E/PTPN6/NLRP3/FCGR2B/JAK3/PTPRC/TNFRSF1B/IL1B/CD1D/FCER1G/NFKBID/HAVCR2/TNFSF13B/CD40/SLC11A1/C3	26	geneontology_Biological_Process	0.0361111	Up
GO:0002440	production of molecular mediator of immune response	38/720	306/18866	1.54872e-10	5.3579e-09	3.90657e-09	SASH3/BTK/CCR2/HLA-DRB1/FGL2/CD74/TNFSF13/PARP3/CD22/IL18/LILRB1/HLA-E/NLRP3/TLR4/FCGR2B/JAK3/PTPRC/TNFRSF1B/IL1B/FCER1G/GAS6/HLA-DQB1/TLR2/TNFSF13B/TNFRSF14/SAMHD1/PTPN22/HMOX1/CD40/CD86/POU2F2/SLC11A1/BATF/ITM2A/SEMA7A/BST2/TCIRG1/MZB1	38	geneontology_Biological_Process	0.0527778	Up
GO:0032612	interleukin-1 production	23/720	121/18866	1.64554e-10	5.65129e-09	4.12049e-09	PYCARD/CLEC7A/CX3CL1/NLRP3/TLR4/MNDA/CASP1/ARRB2/TYROBP/CD33/SIRPA/LGALS9/TREM2/IL1B/HAVCR2/GAS6/LILRA2/GSDMD/CX3CR1/NLRP1/CCL3/EGR1/ACP5	23	geneontology_Biological_Process	0.0319444	Up
GO:0046849	bone remodeling	20/720	91/18866	1.69044e-10	5.76343e-09	4.20225e-09	INPP5D/PTK2B/CSF1R/RASSF2/RAC2/ADAM8/TNFRSF11A/S1PR1/LTBP3/GPR137B/SPP1/TCIRG1/BGLAP/SNX10/MDK/SIGLEC15/DCSTAMP/ACP5/ITGB3/CTSK	20	geneontology_Biological_Process	0.0277778	Up
GO:0032652	regulation of interleukin-1 production	22/720	111/18866	1.76194e-10	5.96397e-09	4.34847e-09	PYCARD/CLEC7A/CX3CL1/NLRP3/TLR4/MNDA/CASP1/ARRB2/TYROBP/CD33/SIRPA/LGALS9/TREM2/HAVCR2/GAS6/LILRA2/GSDMD/CX3CR1/NLRP1/CCL3/EGR1/ACP5	22	geneontology_Biological_Process	0.0305556	Up
GO:0002291	T cell activation via T cell receptor contact with antigen bound to MHC molecule on antigen presenting cell	8/720	10/18866	1.82174e-10	6.12233e-09	4.46394e-09	HLA-DMB/FGL2/LILRB1/ITGAL/LGALS9/HAVCR2/APBB1IP/ICAM1	8	geneontology_Biological_Process	0.0111111	Up
GO:0030198	extracellular matrix organization	44/720	395/18866	1.9898e-10	6.63973e-09	4.84119e-09	ITGAM/CTSS/ITGB2/ITGAL/ITGAX/LCP1/TNFRSF1B/CFLAR/TPSAB1/GAS6/SPINT2/COL15A1/ENG/PDGFB/VWA1/ADAM8/COL18A1/F11R/CST3/ICAM1/MYH11/LTBP3/RAMP2/COL4A2/MMP19/SPP1/COL5A3/SULF1/VCAM1/CCDC80/MATN3/CCN2/EGFL6/VCAN/SMOC2/EGFLAM/SMOC1/PTX3/KLK4/ITGA11/AGT/ITGB3/CTSK	44	geneontology_Biological_Process	0.0611111	Up
GO:0002700	regulation of production of molecular mediator of immune response	25/720	144/18866	2.02949e-10	6.72446e-09	4.90296e-09	SASH3/BTK/CCR2/CD74/TNFSF13/PARP3/CD22/IL18/LILRB1/HLA-E/NLRP3/TLR4/FCGR2B/JAK3/PTPRC/TNFRSF1B/IL1B/FCER1G/TNFRSF14/PTPN22/HMOX1/CD40/SEMA7A/BST2/MZB1	25	geneontology_Biological_Process	0.0347222	Up
GO:0022408	negative regulation of cell-cell adhesion	29/720	191/18866	2.08265e-10	6.85235e-09	4.99621e-09	TNFAIP8L2/HLA-DRB1/FGL2/VSIG4/CD74/LILRB2/VSIR/PRKCD/LILRB1/PTPN6/FCGR2B/JAK3/CD300A/AKNA/LGALS9/NFKBID/HAVCR2/SPINT2/SH2B3/LAG3/TNFRSF14/NOTCH4/PTPN22/IRF1/JAG1/CD86/CXCL12/PODXL/MDK	29	geneontology_Biological_Process	0.0402778	Up
GO:0043062	extracellular structure organization	44/720	396/18866	2.15917e-10	7.05479e-09	5.14381e-09	ITGAM/CTSS/ITGB2/ITGAL/ITGAX/LCP1/TNFRSF1B/CFLAR/TPSAB1/GAS6/SPINT2/COL15A1/ENG/PDGFB/VWA1/ADAM8/COL18A1/F11R/CST3/ICAM1/MYH11/LTBP3/RAMP2/COL4A2/MMP19/SPP1/COL5A3/SULF1/VCAM1/CCDC80/MATN3/CCN2/EGFL6/VCAN/SMOC2/EGFLAM/SMOC1/PTX3/KLK4/ITGA11/AGT/ITGB3/CTSK	44	geneontology_Biological_Process	0.0611111	Up
GO:0043270	positive regulation of ion transport	36/720	284/18866	2.66154e-10	8.63623e-09	6.29688e-09	CCR2/CD4/PRKCD/P2RY6/CX3CL1/PTAFR/CTSS/ARRB2/APLNR/RAMP3/VAMP8/TREM2/IL1B/SHANK3/ACSL5/PLA2G6/CCL4/PDGFB/LILRA2/SNCA/TRPV2/TNFRSF11A/CXCL10/CCL2/APOE/SCN1B/CXCL12/CCR1/CAPN3/CCL3/GSTM2/CXCL9/CCL5/CXCL11/HSPA2/AGT	36	geneontology_Biological_Process	0.05	Up
GO:0050852	T cell receptor signaling pathway	30/720	206/18866	2.8908e-10	9.31591e-09	6.79245e-09	WAS/HLA-DRB1/LCP2/HLA-DPA1/HLA-DPB1/CD4/HLA-DRB5/INPP5D/PTPN6/ZAP70/LILRB4/CD3E/LCK/HLA-DRA/PTPRC/CD300A/CD3D/HLA-DQA1/PTPRJ/NFKBID/HLA-DQB1/FYB1/CD247/THEMIS2/PTPN22/LAT/PSMB9/HLA-DQB2/HLA-DQA2/GBP1	30	geneontology_Biological_Process	0.0416667	Up
GO:0032760	positive regulation of tumor necrosis factor production	15/720	50/18866	2.97996e-10	9.53791e-09	6.95431e-09	SASH3/PYCARD/CD14/PTAFR/HLA-E/TLR4/CD2/CARD9/PTPRC/PTPRJ/FCER1G/TLR2/LY96/CYBA/CCL3	15	geneontology_Biological_Process	0.0208333	Up
GO:0002548	monocyte chemotaxis	17/720	67/18866	3.62276e-10	1.15169e-08	8.39727e-09	CCR2/AIF1/SLAMF8/CX3CL1/CCL4/PDGFB/CCL8/TNFRSF11A/CXCL10/CCL2/SLIT2/CXCL12/CCR1/CCL14/CCL3/CCL5/CCL18	17	geneontology_Biological_Process	0.0236111	Up
GO:0045621	positive regulation of lymphocyte differentiation	21/720	105/18866	3.83401e-10	1.21067e-08	8.8273e-09	SASH3/BTK/CD74/LILRB2/VSIR/IL18/INPP5D/NLRP3/ZAP70/LILRB4/NCKAP1L/PTPRC/LGALS9/IL1B/NFKBID/GAS6/CD27/ADAM8/CD86/TGFBR2/MDK	21	geneontology_Biological_Process	0.0291667	Up
GO:0031589	cell-substrate adhesion	41/720	359/18866	3.92487e-10	1.2311e-08	8.97625e-09	SIGLEC1/CORO1A/MYO1G/CX3CL1/PTK2B/ITGB2/CD3E/ITGAL/PARVG/FERMT3/TRIOBP/PTPRJ/LPXN/GAS6/ACVRL1/CSF1/MICALL2/ZYX/UNC13D/MINK1/TEK/CD34/RAC2/MERTK/JAG1/SNED1/EPDR1/LYVE1/NEDD9/COL5A3/VCAM1/CCDC80/CCN2/MDK/EGFL6/SMOC2/EGFLAM/ITGA11/GBP1/ITGB3/COL16A1	41	geneontology_Biological_Process	0.0569444	Up
GO:0031663	lipopolysaccharide-mediated signaling pathway	16/720	59/18866	4.0692e-10	1.26404e-08	9.2164e-09	LY86/IL18/CD14/CX3CL1/PTAFR/TLR4/HCK/IL1B/TLR2/SIGIRR/LILRA2/PTPN22/CCL2/LY96/CCL3/CCL5	16	geneontology_Biological_Process	0.0222222	Up
GO:0001906	cell killing	27/720	172/18866	4.08361e-10	1.26404e-08	9.2164e-09	RIPK3/CORO1A/ITGAM/LYZ/CLEC7A/VAV1/IL18/LILRB1/HLA-E/PTPN6/STXBP2/FCGR2B/ARRB2/TYROBP/PTPRC/LGALS9/CD1D/HAVCR2/LAG3/UNC13D/ICAM1/SLAMF7/C3/APOL1/PRF1/GNLY/CFH	27	geneontology_Biological_Process	0.0375	Up
GO:0043087	regulation of GTPase activity	49/720	481/18866	4.17423e-10	1.28364e-08	9.35935e-09	DOCK2/FGD2/ARHGAP4/DOCK8/RASAL3/PYCARD/ARHGAP30/RASA4B/ADAP2/ARHGAP9/VAV1/ARHGAP25/CX3CL1/PTK2B/TBC1D10C/RGS18/ARHGAP27/NCKAP1L/ARRB2/ARHGDIB/GMIP/PLXND1/ARHGAP18/CCL4/RAPGEF3/SH3BP1/ARAP3/CCL8/RASA4/CCL2/F11R/ARHGEF15/CD40/S1PR1/ICAM1/SLIT2/RGS5/ARHGAP45	49	geneontology_Biological_Process	0.0680556	Up
GO:1904018	positive regulation of vasculature development	32/720	235/18866	4.27197e-10	1.29682e-08	9.45542e-09	CYBB/CX3CL1/PTK2B/TNFSF12/ITGB2/C3AR1/APLNR/ITGAX/CFLAR/IL1B/ACVRL1/C5AR1/ENG/PDGFB/RAPGEF3/TEK/CD34/HMOX1/CD40/TGFBR2/CDH5/CX3CR1/C3/RAMP2/TIE1/F3/GRN/HYAL1/MDK/HGF/SMOC2/EGR1	32	geneontology_Biological_Process	0.0444444	Up
GO:0001818	negative regulation of cytokine production	41/720	360/18866	4.2722e-10	1.29682e-08	9.45542e-09	BTK/HLA-DRB1/VSIG4/PYCARD/VSIR/UBA7/LILRB1/CX3CL1/PTPN6/NLRP3/TLR4/FCGR2B/NCKAP1L/ARRB2/TYROBP/JAK3/CD33/PTPRC/DHX58/SIRPA/LGALS9/TREM2/HAVCR2/GAS6/CD34/MERTK/PTPN22/HMOX1/CX3CR1/UBE2L6/SLC11A1/NLRC5/CLEC4A/CD84/SRGN/CD200/BST2/ZFP36/HGF/ACP5/GBP1	41	geneontology_Biological_Process	0.0569444	Up
GO:2000106	regulation of leukocyte apoptotic process	19/720	86/18866	4.40055e-10	1.32722e-08	9.67706e-09	RIPK3/BTK/DOCK8/HCLS1/CD74/LILRB1/GIMAP8/JAK3/LGALS9/CCR5/FCER1G/NFKBID/GAS6/CD27/ADAM8/MERTK/CXCL12/IRF7/CCL5	19	geneontology_Biological_Process	0.0263889	Up
GO:0032611	interleukin-1 beta production	21/720	106/18866	4.61247e-10	1.38227e-08	1.00785e-08	PYCARD/CLEC7A/CX3CL1/NLRP3/TLR4/MNDA/CASP1/ARRB2/TYROBP/CD33/SIRPA/LGALS9/TREM2/IL1B/LILRA2/GSDMD/CX3CR1/NLRP1/CCL3/EGR1/ACP5	21	geneontology_Biological_Process	0.0291667	Up
GO:0002690	positive regulation of leukocyte chemotaxis	20/720	96/18866	4.6739e-10	1.39182e-08	1.01481e-08	CCR2/AIF1/CD74/GPSM3/PTK2B/CSF1R/C3AR1/NCKAP1L/LGALS9/GAS6/CSF1/C5AR1/CCL4/RAC2/CXCL10/CXCL12/CCR1/CCL3/CCL5/MDK	20	geneontology_Biological_Process	0.0277778	Up
GO:0150076	neuroinflammatory response	18/720	77/18866	4.73055e-10	1.39983e-08	1.02065e-08	ITGAM/C1QA/AIF1/IL18/CX3CL1/ITGB2/TYROBP/PTPRC/TNFRSF1B/TREM2/IL1B/TLR2/C5AR1/SNCA/GRN/CCL3/CD200/CST7	18	geneontology_Biological_Process	0.025	Up
GO:0033003	regulation of mast cell activation	14/720	44/18866	4.87297e-10	1.42406e-08	1.03831e-08	FES/CD300LF/STXBP2/FGR/CD300A/LGALS9/VAMP8/FCER1G/ADGRE2/UNC13D/RAC2/HMOX1/MILR1/CD84	14	geneontology_Biological_Process	0.0194444	Up
GO:0097028	dendritic cell differentiation	14/720	44/18866	4.87297e-10	1.42406e-08	1.03831e-08	TRPM2/LILRB2/TMEM176B/LILRB1/TMEM176A/FCGR2B/SPI1/LGALS9/TREM2/GAS6/BATF3/TGFBR2/BATF/DCSTAMP	14	geneontology_Biological_Process	0.0194444	Up
GO:0045637	regulation of myeloid cell differentiation	34/720	263/18866	4.96042e-10	1.42552e-08	1.03938e-08	FES/HLA-DRB1/HCLS1/CD74/C1QC/CD4/LILRB1/INPP5D/PTK2B/TLR4/LILRB4/NCKAP1L/TYROBP/CSF3R/SPI1/TREM2/RASSF2/CSF1/EVI2B/JAG1/RHEX/CCR1/GPR68/GPR137B/CCL3/IRF7/MYL9/ZFP36/LIF/BGLAP/FOS/SIGLEC15/DCSTAMP/SCIN	34	geneontology_Biological_Process	0.0472222	Up
GO:0050730	regulation of peptidyl-tyrosine phosphorylation	34/720	263/18866	4.96042e-10	1.42552e-08	1.03938e-08	NCF1/HCLS1/CD74/CD4/PRKCD/IL18/PTK2B/PTPN6/ITGB2/CD3E/CSF1R/SAMSN1/ARRB2/PTPRC/CD300A/TREM2/PTPRJ/GAS6/OSM/HYAL2/FCGR1A/SH2B3/TNFRSF14/PDGFB/CD40/ICAM1/MVP/NEDD9/SOCS3/LIF/CCL5/HGF/AGT/ITGB3	34	geneontology_Biological_Process	0.0472222	Up
GO:0045580	regulation of T cell differentiation	25/720	150/18866	4.98265e-10	1.42552e-08	1.03938e-08	SASH3/CCR2/FGL2/CD74/LILRB2/VSIR/IL18/NLRP3/ZAP70/LILRB4/CD2/HLA-DOA/NCKAP1L/JAK3/PTPRC/LGALS9/IL1B/NFKBID/LAG3/CD27/ADAM8/IRF1/CD86/TGFBR2/MDK	25	geneontology_Biological_Process	0.0347222	Up
GO:0045730	respiratory burst	13/720	37/18866	4.99918e-10	1.42552e-08	1.03938e-08	NCF4/NCF1/CYBB/CLEC7A/SLAMF8/HCK/CD52/NCF2/JCHAIN/RAC2/SLC11A1/CYBA/GRN	13	geneontology_Biological_Process	0.0180556	Up
GO:0032653	regulation of interleukin-10 production	16/720	60/18866	5.35459e-10	1.51767e-08	1.10657e-08	SASH3/HLA-DRB1/PYCARD/CLEC7A/VSIR/LILRB1/TLR4/FCGR2B/TYROBP/JAK3/LGALS9/TREM2/FCER1G/TLR2/CD34/HGF	16	geneontology_Biological_Process	0.0222222	Up
GO:0002704	negative regulation of leukocyte mediated immunity	15/720	52/18866	5.5258e-10	1.55682e-08	1.13511e-08	CCR2/PARP3/LILRB1/HLA-E/PTPN6/FCGR2B/ARRB2/JAK3/PTPRC/CD300A/LGALS9/HAVCR2/HMOX1/CD84/BST2	15	geneontology_Biological_Process	0.0208333	Up
GO:0032651	regulation of interleukin-1 beta production	20/720	97/18866	5.68032e-10	1.59083e-08	1.15991e-08	PYCARD/CLEC7A/CX3CL1/NLRP3/TLR4/MNDA/CASP1/ARRB2/TYROBP/CD33/SIRPA/LGALS9/TREM2/LILRA2/GSDMD/CX3CR1/NLRP1/CCL3/EGR1/ACP5	20	geneontology_Biological_Process	0.0277778	Up
GO:0098883	synapse pruning	8/720	11/18866	6.45569e-10	1.79728e-08	1.31044e-08	ITGAM/C1QA/C1QB/C1QC/CX3CL1/TREM2/CX3CR1/C3	8	geneontology_Biological_Process	0.0111111	Up
GO:0001909	leukocyte mediated cytotoxicity	21/720	108/18866	6.62999e-10	1.82422e-08	1.33008e-08	RIPK3/CORO1A/ITGAM/VAV1/IL18/LILRB1/HLA-E/PTPN6/STXBP2/FCGR2B/ARRB2/TYROBP/PTPRC/LGALS9/CD1D/HAVCR2/LAG3/UNC13D/ICAM1/SLAMF7/PRF1	21	geneontology_Biological_Process	0.0291667	Up
GO:0007229	integrin-mediated signaling pathway	21/720	108/18866	6.62999e-10	1.82422e-08	1.33008e-08	PLEK/ITGAM/VAV1/PTK2B/HCK/FGR/ITGB2/ITGAL/TYROBP/FERMT3/ITGAX/FCER1G/FYB1/ZYX/LAT/SEMA7A/NEDD9/CCN2/ITGA11/ITGB3/COL16A1	21	geneontology_Biological_Process	0.0291667	Up
GO:0032755	positive regulation of interleukin-6 production	19/720	88/18866	6.68372e-10	1.82831e-08	1.33306e-08	AIF1/CD74/PYCARD/CLEC7A/LILRB2/TLR4/IL17RA/CARD9/TYROBP/LGALS9/IL1B/FCER1G/HYAL2/TLR2/TLR1/LILRA2/MAPK13/POU2F2/CYBA	19	geneontology_Biological_Process	0.0263889	Up
GO:0006816	calcium ion transport	45/720	426/18866	6.95236e-10	1.8908e-08	1.37863e-08	TRPM2/CORO1A/LILRB2/CD4/GJA4/P2RY6/LILRB1/CX3CL1/PTK2B/PTPN6/LCK/ARRB2/APLNR/CD33/RAMP3/PTPRC/CCR5/GAS6/PLA2G6/CCL4/TMEM37/PDGFB/LILRA2/SNCA/CCL8/TRPV2/CXCL10/CCL2/CACNA2D4/ICAM1/CXCL12/CCR1/RAMP2/CAPN3/ATP2A3/CYBA/CD84/CCL3/GSTM2/CXCL9/CCL5/CCN2/CXCL11/H	45	geneontology_Biological_Process	0.0625	Up
GO:0051924	regulation of calcium ion transport	33/720	253/18866	7.08368e-10	1.91544e-08	1.39659e-08	CORO1A/LILRB2/CD4/P2RY6/LILRB1/CX3CL1/PTK2B/PTPN6/ARRB2/APLNR/CD33/RAMP3/PLA2G6/CCL4/PDGFB/LILRA2/SNCA/TRPV2/CXCL10/CCL2/ICAM1/CXCL12/CCR1/CAPN3/CYBA/CD84/CCL3/GSTM2/CXCL9/CCL5/CXCL11/HSPA2/AGT	33	geneontology_Biological_Process	0.0458333	Up
GO:1901342	regulation of vasculature development	46/720	444/18866	8.43092e-10	2.26671e-08	1.65271e-08	ALOX5/CCR2/STAB1/CYBB/CX3CL1/PTK2B/TNFSF12/ITGB2/SEMA4A/C3AR1/APLNR/ITGAX/PLXND1/CFLAR/IL1B/HHEX/ACVRL1/C5AR1/ENG/PDGFB/RAPGEF3/PTPRM/TEK/VASH1/CD34/HMOX1/CXCL10/CD40/TGFBR2/CDH5/CX3CR1/C3/RAMP2/TIE1/COL4A2/F3/GRN/SULF1/ECSCR/HYAL1/CLDN5/MDK/HGF/SMOC2/EGR	46	geneontology_Biological_Process	0.0638889	Up
GO:0002706	regulation of lymphocyte mediated immunity	25/720	154/18866	8.82878e-10	2.36019e-08	1.72087e-08	RIPK3/SASH3/WAS/BTK/CCR2/TNFSF13/PARP3/VAV1/IL18/LILRB1/HLA-E/PTPN6/NLRP3/FCGR2B/ARRB2/PTPRC/LGALS9/TNFRSF1B/IL1B/CD1D/FCER1G/HAVCR2/LAG3/CD40/C3	25	geneontology_Biological_Process	0.0347222	Up
GO:0043304	regulation of mast cell degranulation	12/720	32/18866	9.75263e-10	2.59244e-08	1.89021e-08	FES/STXBP2/FGR/CD300A/LGALS9/VAMP8/FCER1G/ADGRE2/UNC13D/RAC2/HMOX1/CD84	12	geneontology_Biological_Process	0.0166667	Up
GO:0032623	interleukin-2 production	15/720	54/18866	9.93892e-10	2.62711e-08	1.91549e-08	SASH3/CCR2/VSIG4/CLEC7A/CD4/PTPRC/IL1B/FCER1G/HAVCR2/CD247/CD34/CD86/SLC11A1/ZFP36/GBP1	15	geneontology_Biological_Process	0.0208333	Up
GO:0072511	divalent inorganic cation transport	48/720	478/18866	1.02315e-09	2.68934e-08	1.96086e-08	TRPM2/CORO1A/LILRB2/CD4/GJA4/P2RY6/LILRB1/CX3CL1/PTK2B/PTPN6/LCK/ARRB2/APLNR/CD33/RAMP3/PTPRC/TCN2/CCR5/GAS6/PLA2G6/CCL4/TMEM37/PDGFB/LILRA2/SNCA/CCL8/TRPV2/CXCL10/CCL2/CACNA2D4/ICAM1/CXCL12/CCR1/SLC11A1/RAMP2/CAPN3/ATP2A3/CYBA/CD84/SLC40A1/CCL3/GSTM2/CXC	48	geneontology_Biological_Process	0.0666667	Up
GO:2000249	regulation of actin cytoskeleton reorganization	13/720	39/18866	1.06209e-09	2.77618e-08	2.02418e-08	TRPM2/FES/HCLS1/PTK2B/HCK/CSF1R/ARHGDIB/RAPGEF3/TEK/ESAM/F11R/GMFG/MDK	13	geneontology_Biological_Process	0.0180556	Up
GO:0051928	positive regulation of calcium ion transport	22/720	122/18866	1.17528e-09	3.04632e-08	2.22114e-08	CD4/P2RY6/CX3CL1/ARRB2/APLNR/RAMP3/CCL4/PDGFB/LILRA2/SNCA/TRPV2/CXCL10/CCL2/CXCL12/CCR1/CAPN3/CCL3/GSTM2/CXCL9/CCL5/CXCL11/HSPA2	22	geneontology_Biological_Process	0.0305556	Up
GO:0046635	positive regulation of alpha-beta T cell activation	16/720	63/18866	1.17838e-09	3.04632e-08	2.22114e-08	SASH3/CCR2/RASAL3/IL18/HLA-E/NLRP3/ZAP70/CD3E/NCKAP1L/PTPRC/LGALS9/NFKBID/EBI3/PTPN22/CD86/TGFBR2	16	geneontology_Biological_Process	0.0222222	Up
GO:0045765	regulation of angiogenesis	43/720	403/18866	1.23157e-09	3.16641e-08	2.30871e-08	ALOX5/CCR2/STAB1/CYBB/CX3CL1/PTK2B/TNFSF12/ITGB2/SEMA4A/C3AR1/APLNR/ITGAX/PLXND1/IL1B/HHEX/ACVRL1/C5AR1/ENG/RAPGEF3/PTPRM/TEK/VASH1/CD34/HMOX1/CXCL10/CD40/TGFBR2/CDH5/CX3CR1/C3/RAMP2/TIE1/COL4A2/F3/GRN/SULF1/ECSCR/HYAL1/CLDN5/MDK/HGF/SMOC2/AGT	43	geneontology_Biological_Process	0.0597222	Up
GO:0032720	negative regulation of tumor necrosis factor production	15/720	55/18866	1.31888e-09	3.37247e-08	2.45894e-08	VSIR/CX3CL1/PTPN6/TLR4/ARRB2/CD33/SIRPA/LGALS9/TREM2/HAVCR2/GAS6/CD34/PTPN22/CLEC4A/ACP5	15	geneontology_Biological_Process	0.0208333	Up
GO:0007162	negative regulation of cell adhesion	36/720	301/18866	1.33829e-09	3.40361e-08	2.48165e-08	TNFAIP8L2/HLA-DRB1/FGL2/VSIG4/CD74/LILRB2/VSIR/PRKCD/LILRB1/CX3CL1/PTPN6/FCGR2B/JAK3/PTPRC/ARHGDIB/CD300A/AKNA/LGALS9/PLXND1/LPXN/NFKBID/HAVCR2/ACVRL1/SPINT2/SH2B3/LAG3/TNFRSF14/NOTCH4/PTPN22/IRF1/JAG1/CD86/CXCL12/PODXL/MDK/GBP1	36	geneontology_Biological_Process	0.05	Up
GO:0046718	viral entry into host cell	23/720	134/18866	1.35676e-09	3.43202e-08	2.50236e-08	SIGLEC1/CD209/HLA-DRB1/CD74/CD4/TRIM22/FCN1/LGALS9/VAMP8/CCR5/SELPLG/GAS6/HYAL2/TNFRSF14/CLEC5A/F11R/CD86/ICAM1/ANPEP/IFITM2/HYAL1/PTX3/ITGB3	23	geneontology_Biological_Process	0.0319444	Up
GO:0033006	regulation of mast cell activation involved in immune response	12/720	33/18866	1.47962e-09	3.72278e-08	2.71437e-08	FES/STXBP2/FGR/CD300A/LGALS9/VAMP8/FCER1G/ADGRE2/UNC13D/RAC2/HMOX1/CD84	12	geneontology_Biological_Process	0.0166667	Up
GO:0043547	positive regulation of GTPase activity	43/720	406/18866	1.54755e-09	3.873e-08	2.8239e-08	DOCK2/ARHGAP4/DOCK8/RASAL3/ARHGAP30/RASA4B/ADAP2/ARHGAP9/VAV1/ARHGAP25/CX3CL1/PTK2B/TBC1D10C/RGS18/ARHGAP27/NCKAP1L/ARHGDIB/GMIP/ARHGAP18/CCL4/RAPGEF3/SH3BP1/ARAP3/CCL8/RASA4/CCL2/F11R/ARHGEF15/CD40/S1PR1/ICAM1/RGS5/ARHGAP45/CCL14/CCL3/RGL3/NEDD9/RGS1/RGS	43	geneontology_Biological_Process	0.0597222	Up
GO:0001894	tissue homeostasis	33/720	261/18866	1.5895e-09	3.95693e-08	2.88509e-08	SASH3/CORO1A/CCR2/LYZ/INPP5D/PTK2B/TLR4/CSF1R/CSF1/JCHAIN/CD34/RAC2/ADAM8/ESAM/TNFRSF11A/F11R/S1PR1/CDH5/LTBP3/EPAS1/GPR137B/LDB2/SPP1/TCIRG1/BGLAP/SNX10/CLDN5/CCN2/SIGLEC15/DCSTAMP/ACP5/ITGB3/CTSK	33	geneontology_Biological_Process	0.0458333	Up
GO:0002698	negative regulation of immune effector process	22/720	124/18866	1.61925e-09	3.98993e-08	2.90915e-08	CCR2/FGL2/VSIG4/PARP3/CD22/SLAMF8/LILRB1/HLA-E/PTPN6/FCGR2B/ARRB2/JAK3/PTPRC/DHX58/CD300A/LGALS9/HAVCR2/SERPING1/HMOX1/CD84/GRN/BST2	22	geneontology_Biological_Process	0.0305556	Up
GO:0045766	positive regulation of angiogenesis	29/720	208/18866	1.61972e-09	3.98993e-08	2.90915e-08	CYBB/CX3CL1/PTK2B/TNFSF12/ITGB2/C3AR1/APLNR/ITGAX/IL1B/ACVRL1/C5AR1/ENG/RAPGEF3/TEK/CD34/HMOX1/CD40/TGFBR2/CDH5/CX3CR1/C3/RAMP2/TIE1/F3/GRN/HYAL1/MDK/HGF/SMOC2	29	geneontology_Biological_Process	0.0402778	Up
GO:0002495	antigen processing and presentation of peptide antigen via MHC class II	20/720	103/18866	1.73499e-09	4.25163e-08	3.09996e-08	HLA-DMB/HLA-DRB1/CD74/PYCARD/HLA-DPA1/HLA-DMA/HLA-DPB1/HLA-DRB5/CTSS/FCGR2B/HLA-DOA/HLA-DRA/HLA-DQA1/TREM2/FCER1G/HLA-DQB1/LAG3/IFI30/HLA-DQB2/HLA-DQA2	20	geneontology_Biological_Process	0.0277778	Up
GO:0048247	lymphocyte chemotaxis	16/720	65/18866	1.94086e-09	4.73149e-08	3.44984e-08	CCR2/CX3CL1/PTK2B/GAS6/CXCL16/CCL4/ADAM8/CCL8/CXCL10/CCL2/HSD3B7/CCL14/CCL3/CCL5/CXCL11/CCL18	16	geneontology_Biological_Process	0.0222222	Up
GO:0002367	cytokine production involved in immune response	20/720	104/18866	2.07238e-09	5.00028e-08	3.64582e-08	SASH3/BTK/CCR2/CD74/IL18/LILRB1/HLA-E/NLRP3/TLR4/JAK3/TNFRSF1B/IL1B/FCER1G/GAS6/TLR2/TNFRSF14/HMOX1/SLC11A1/SEMA7A/BST2	20	geneontology_Biological_Process	0.0277778	Up
GO:0002504	antigen processing and presentation of peptide or polysaccharide antigen via MHC class II	20/720	104/18866	2.07238e-09	5.00028e-08	3.64582e-08	HLA-DMB/HLA-DRB1/CD74/PYCARD/HLA-DPA1/HLA-DMA/HLA-DPB1/HLA-DRB5/CTSS/FCGR2B/HLA-DOA/HLA-DRA/HLA-DQA1/TREM2/FCER1G/HLA-DQB1/LAG3/IFI30/HLA-DQB2/HLA-DQA2	20	geneontology_Biological_Process	0.0277778	Up
GO:1903556	negative regulation of tumor necrosis factor superfamily cytokine production	15/720	57/18866	2.27703e-09	5.43829e-08	3.96519e-08	VSIR/CX3CL1/PTPN6/TLR4/ARRB2/CD33/SIRPA/LGALS9/TREM2/HAVCR2/GAS6/CD34/PTPN22/CLEC4A/ACP5	15	geneontology_Biological_Process	0.0208333	Up
GO:1905517	macrophage migration	15/720	57/18866	2.27703e-09	5.43829e-08	3.96519e-08	CCR2/SLAMF8/CX3CL1/PTK2B/CSF1R/C3AR1/TREM2/CSF1/C5AR1/CCL2/CX3CR1/CCL3/CD200/CCL5/MDK	15	geneontology_Biological_Process	0.0208333	Up
GO:0070664	negative regulation of leukocyte proliferation	18/720	86/18866	3.19909e-09	7.56124e-08	5.51308e-08	BTK/HLA-DRB1/VSIG4/LILRB2/VSIR/LILRB1/LST1/INPP5D/PTPN6/FCGR2B/MNDA/TYROBP/CD300A/LGALS9/HAVCR2/TNFRSF14/CCL8/CD86	18	geneontology_Biological_Process	0.025	Up
GO:0001774	microglial cell activation	14/720	50/18866	3.21413e-09	7.56124e-08	5.51308e-08	ITGAM/C1QA/AIF1/CX3CL1/ITGB2/TYROBP/PTPRC/TREM2/TLR2/C5AR1/SNCA/GRN/CCL3/CST7	14	geneontology_Biological_Process	0.0194444	Up
GO:0002269	leukocyte activation involved in inflammatory response	14/720	50/18866	3.21413e-09	7.56124e-08	5.51308e-08	ITGAM/C1QA/AIF1/CX3CL1/ITGB2/TYROBP/PTPRC/TREM2/TLR2/C5AR1/SNCA/GRN/CCL3/CST7	14	geneontology_Biological_Process	0.0194444	Up
GO:0002224	toll-like receptor signaling pathway	24/720	152/18866	3.40041e-09	7.95967e-08	5.80358e-08	BTK/ITGAM/CD300LF/CD14/CTSS/TLR4/ITGB2/PIK3AP1/ARRB2/CD300A/S100A9/HAVCR2/TLR2/TLR1/LILRA2/TLR5/PTPN22/IRF1/LY96/CD40/CYBA/S100A8/IRF7/CTSK	24	geneontology_Biological_Process	0.0333333	Up
GO:0050868	negative regulation of T cell activation	21/720	118/18866	3.58718e-09	8.35528e-08	6.09203e-08	TNFAIP8L2/HLA-DRB1/FGL2/VSIG4/CD74/LILRB2/VSIR/LILRB1/PTPN6/FCGR2B/JAK3/CD300A/LGALS9/NFKBID/HAVCR2/LAG3/TNFRSF14/PTPN22/IRF1/CD86/MDK	21	geneontology_Biological_Process	0.0291667	Up
GO:0055074	calcium ion homeostasis	46/720	468/18866	4.53896e-09	1.05201e-07	7.67045e-08	TRPM2/CORO1A/CCR2/CD4/P2RY6/CX3CL1/PTK2B/PTPN6/FPR3/LCK/FAM20A/FPR1/C3AR1/APLNR/RAMP3/PTPRC/GNA15/CCR5/CD52/PLA2G6/C5AR1/SNCA/CCL8/TRPV2/CXCL10/APOE/LPAR6/CD40/S1PR1/CDH5/CX3CR1/CXCL12/CCR1/CAPN3/ATP2A3/CYBA/CCL14/CCL3/TCIRG1/TGM2/GSTM2/CXCL9/CCL5/SNX10/C	46	geneontology_Biological_Process	0.0638889	Up
GO:0009595	detection of biotic stimulus	12/720	36/18866	4.69737e-09	1.0781e-07	7.8607e-08	HLA-DRB1/CLEC7A/NLRP3/TLR4/TREM2/PTPRJ/CD1D/NAIP/TLR2/TLR1/LY96/C4B	12	geneontology_Biological_Process	0.0166667	Up
GO:0042554	superoxide anion generation	12/720	36/18866	4.69737e-09	1.0781e-07	7.8607e-08	ITGAM/NCF1/CYBB/CLEC7A/PRKCD/ITGB2/TYROBP/NCF2/PON3/CYBA/ACP5/AGT	12	geneontology_Biological_Process	0.0166667	Up
GO:0032956	regulation of actin cytoskeleton organization	39/720	360/18866	4.79297e-09	1.09471e-07	7.98175e-08	PLEK/WAS/TRPM2/CORO1A/FES/HCLS1/PYCARD/PRKCD/CX3CL1/PTK2B/HCK/CSF1R/NCKAP1L/TRIOBP/ARHGDIB/SHANK3/ARHGAP18/ARPC1B/RAPGEF3/CAPG/TEK/FCHSD1/KANK3/SH3BP1/RAC2/ESAM/F11R/ARHGEF15/GMFG/S1PR1/ICAM1/SLIT2/CXCL12/BST2/CCN2/MDK/SHANK1/SIGLEC15/SCIN	39	geneontology_Biological_Process	0.0541667	Up
GO:0061900	glial cell activation	15/720	60/18866	4.93607e-09	1.12194e-07	8.18034e-08	ITGAM/C1QA/AIF1/CX3CL1/ITGB2/TYROBP/PTPRC/TREM2/IL1B/TLR2/C5AR1/SNCA/GRN/CCL3/CST7	15	geneontology_Biological_Process	0.0208333	Up
GO:0070838	divalent metal ion transport	46/720	471/18866	5.54764e-09	1.25489e-07	9.14968e-08	TRPM2/CORO1A/LILRB2/CD4/GJA4/P2RY6/LILRB1/CX3CL1/PTK2B/PTPN6/LCK/ARRB2/APLNR/CD33/RAMP3/PTPRC/CCR5/GAS6/PLA2G6/CCL4/TMEM37/PDGFB/LILRA2/SNCA/CCL8/TRPV2/CXCL10/CCL2/CACNA2D4/ICAM1/CXCL12/CCR1/SLC11A1/RAMP2/CAPN3/ATP2A3/CYBA/CD84/CCL3/GSTM2/CXCL9/CCL5/CCN2/	46	geneontology_Biological_Process	0.0638889	Up
GO:0050672	negative regulation of lymphocyte proliferation	17/720	79/18866	5.59522e-09	1.25959e-07	9.184e-08	BTK/HLA-DRB1/VSIG4/LILRB2/VSIR/LILRB1/LST1/INPP5D/PTPN6/FCGR2B/MNDA/TYROBP/CD300A/LGALS9/HAVCR2/TNFRSF14/CD86	17	geneontology_Biological_Process	0.0236111	Up
GO:1905521	regulation of macrophage migration	13/720	44/18866	5.69026e-09	1.27489e-07	9.29551e-08	SLAMF8/CX3CL1/PTK2B/CSF1R/C3AR1/TREM2/CSF1/C5AR1/CX3CR1/CCL3/CD200/CCL5/MDK	13	geneontology_Biological_Process	0.0180556	Up
GO:0007599	hemostasis	38/720	348/18866	6.082e-09	1.3562e-07	9.88837e-08	PLEK/WAS/DOCK8/LCP2/VAV1/PRKCD/PTPN6/TLR4/PIK3R5/ENTPD1/LCK/ARRB2/FERMT3/SERPINA1/GNA15/FCER1G/GAS6/PRKCH/SH2B3/PDGFB/SERPING1/ZNF385A/CD34/F13A1/MERTK/IRF1/HBB/F11R/APOE/CD40/THBD/F3/GNG2/MYL9/HBG2/PLAT/F5/ITGB3	38	geneontology_Biological_Process	0.0527778	Up
GO:0032945	negative regulation of mononuclear cell proliferation	17/720	80/18866	6.85597e-09	1.52157e-07	1.10941e-07	BTK/HLA-DRB1/VSIG4/LILRB2/VSIR/LILRB1/LST1/INPP5D/PTPN6/FCGR2B/MNDA/TYROBP/CD300A/LGALS9/HAVCR2/TNFRSF14/CD86	17	geneontology_Biological_Process	0.0236111	Up
GO:0098581	detection of external biotic stimulus	10/720	24/18866	7.4373e-09	1.64284e-07	1.19783e-07	HLA-DRB1/CLEC7A/TLR4/TREM2/CD1D/NAIP/TLR2/TLR1/LY96/C4B	10	geneontology_Biological_Process	0.0138889	Up
GO:0030168	platelet activation	24/720	158/18866	7.49204e-09	1.6472e-07	1.20101e-07	PLEK/LCP2/VAV1/PRKCD/PTPN6/TLR4/PIK3R5/LCK/ARRB2/FERMT3/GNA15/FCER1G/PRKCH/SH2B3/PDGFB/MERTK/HBB/F11R/APOE/CD40/THBD/GNG2/MYL9/ITGB3	24	geneontology_Biological_Process	0.0333333	Up
GO:0072503	cellular divalent inorganic cation homeostasis	47/720	492/18866	7.61833e-09	1.66717e-07	1.21557e-07	TRPM2/CORO1A/CCR2/CD4/P2RY6/CX3CL1/PTK2B/PTPN6/FPR3/LCK/FPR1/C3AR1/APLNR/RAMP3/PTPRC/S100A9/GNA15/CCR5/CD52/PLA2G6/C5AR1/SNCA/CCL8/TRPV2/CXCL10/APOE/LPAR6/CD40/S1PR1/CDH5/CX3CR1/CXCL12/CCR1/SLC11A1/CAPN3/ATP2A3/CYBA/CCL14/CCL3/S100A8/TCIRG1/TGM2/GSTM2/CXC	47	geneontology_Biological_Process	0.0652778	Up
GO:0045639	positive regulation of myeloid cell differentiation	19/720	101/18866	7.67467e-09	1.67173e-07	1.2189e-07	FES/HLA-DRB1/HCLS1/CD74/CD4/INPP5D/NCKAP1L/TYROBP/TREM2/CSF1/EVI2B/JAG1/RHEX/CCR1/GPR68/LIF/FOS/DCSTAMP/SCIN	19	geneontology_Biological_Process	0.0263889	Up
GO:0030888	regulation of B cell proliferation	15/720	62/18866	8.04265e-09	1.74381e-07	1.27145e-07	SASH3/BTK/CD74/CD22/INPP5D/TLR4/FCGR2B/MNDA/NCKAP1L/TYROBP/PTPRC/CD300A/TNFSF13B/CD40/MZB1	15	geneontology_Biological_Process	0.0208333	Up
GO:0003158	endothelium development	22/720	135/18866	8.39324e-09	1.81148e-07	1.32079e-07	GJA4/SOX17/ITGAX/IL1B/ACVRL1/COL15A1/ENG/RAPGEF3/GJA5/CD34/NOTCH4/COL18A1/ROBO4/CXCL10/F11R/JAG1/S1PR1/ICAM1/CDH5/GPX1/SLC40A1/CLDN5	22	geneontology_Biological_Process	0.0305556	Up
GO:0044409	entry into host	23/720	147/18866	8.62169e-09	1.85229e-07	1.35055e-07	SIGLEC1/CD209/HLA-DRB1/CD74/CD4/TRIM22/FCN1/LGALS9/VAMP8/CCR5/SELPLG/GAS6/HYAL2/TNFRSF14/CLEC5A/F11R/CD86/ICAM1/ANPEP/IFITM2/HYAL1/PTX3/ITGB3	23	geneontology_Biological_Process	0.0319444	Up
GO:2000403	positive regulation of lymphocyte migration	12/720	38/18866	9.47151e-09	2.02561e-07	1.47692e-07	CCR2/DOCK8/AIF1/PYCARD/PTK2B/CCL4/TNFRSF14/ADAM8/CXCL10/CXCL12/CCL3/CCL5	12	geneontology_Biological_Process	0.0166667	Up
GO:0032757	positive regulation of interleukin-8 production	14/720	54/18866	9.65353e-09	2.0552e-07	1.49849e-07	CD74/PYCARD/CLEC7A/CD14/TLR4/FCN1/CD2/LGALS9/IL1B/HYAL2/TLR2/TLR1/TLR5/F3	14	geneontology_Biological_Process	0.0194444	Up
GO:0045582	positive regulation of T cell differentiation	18/720	92/18866	9.9364e-09	2.10589e-07	1.53545e-07	SASH3/CD74/LILRB2/VSIR/IL18/NLRP3/ZAP70/LILRB4/NCKAP1L/PTPRC/LGALS9/IL1B/NFKBID/CD27/ADAM8/CD86/TGFBR2/MDK	18	geneontology_Biological_Process	0.025	Up
GO:0030183	B cell differentiation	22/720	137/18866	1.11013e-08	2.33176e-07	1.70014e-07	MFNG/BTK/NFAM1/LYL1/BLNK/SLAMF8/INPP5D/PTK2B/PTPN6/FCGR2B/NCKAP1L/JAK3/PTPRC/HHEX/PTPRJ/CD79A/CD27/POU2F2/ITM2A/TCIRG1/LFNG/VCAM1	22	geneontology_Biological_Process	0.0305556	Up
GO:1903038	negative regulation of leukocyte cell-cell adhesion	22/720	137/18866	1.11013e-08	2.33176e-07	1.70014e-07	TNFAIP8L2/HLA-DRB1/FGL2/VSIG4/CD74/LILRB2/VSIR/LILRB1/PTPN6/FCGR2B/JAK3/CD300A/LGALS9/NFKBID/HAVCR2/LAG3/TNFRSF14/PTPN22/IRF1/CD86/CXCL12/MDK	22	geneontology_Biological_Process	0.0305556	Up
GO:0007015	actin filament organization	43/720	434/18866	1.15533e-08	2.41592e-07	1.7615e-07	PLEK/WAS/CORO1A/MYO1F/HCLS1/AIF1/MYO7A/MYO1G/PYCARD/PRKCD/ARHGAP25/CX3CL1/PTK2B/HCK/NCKAP1L/TRIOBP/LCP1/SHANK3/ARHGAP18/MICALL2/ZYX/PSTPIP1/ARPC1B/RAPGEF3/CAPG/FCHSD1/KANK3/SH3BP1/RAC2/ESAM/F11R/ARHGEF15/GMFG/S1PR1/ICAM1/SLIT2/CXCL12/SHTN1/NEDD9/GAS7/CCN2	43	geneontology_Biological_Process	0.0597222	Up
GO:0002718	regulation of cytokine production involved in immune response	17/720	83/18866	1.23687e-08	2.57498e-07	1.87748e-07	SASH3/BTK/CCR2/CD74/IL18/LILRB1/HLA-E/NLRP3/TLR4/JAK3/TNFRSF1B/IL1B/FCER1G/TNFRSF14/HMOX1/SEMA7A/BST2	17	geneontology_Biological_Process	0.0236111	Up
GO:2000425	regulation of apoptotic cell clearance	7/720	10/18866	1.24371e-08	2.57783e-07	1.87956e-07	CD300LF/TREM2/CCL2/C3/C4B/C2/C4A	7	geneontology_Biological_Process	0.00972222	Up
GO:0002456	T cell mediated immunity	19/720	104/18866	1.27088e-08	2.62259e-07	1.91219e-07	RIPK3/SASH3/WAS/CCR2/MYO1G/IL18/LILRB1/HLA-E/NLRP3/FCGR2B/PTPRC/TNFRSF1B/IL1B/CD1D/JAG1/ICAM1/SLC11A1/PRF1/CD8A	19	geneontology_Biological_Process	0.0263889	Up
GO:2000401	regulation of lymphocyte migration	15/720	64/18866	1.28423e-08	2.63856e-07	1.92383e-07	RIPK3/CCR2/DOCK8/AIF1/PYCARD/PTK2B/CCL4/TNFRSF14/ADAM8/CXCL10/CCL2/CXCL12/CCL3/CD200/CCL5	15	geneontology_Biological_Process	0.0208333	Up
GO:0002221	pattern recognition receptor signaling pathway	27/720	201/18866	1.3344e-08	2.71611e-07	1.98038e-07	BTK/ITGAM/CD300LF/CD14/CTSS/TLR4/FCN1/ITGB2/PIK3AP1/ARRB2/DHX58/CD300A/S100A9/HAVCR2/TLR2/TLR1/LILRA2/TLR5/CLEC4E/PTPN22/IRF1/LY96/CD40/CYBA/S100A8/IRF7/CTSK	27	geneontology_Biological_Process	0.0375	Up
GO:0007596	blood coagulation	37/720	343/18866	1.33821e-08	2.71611e-07	1.98038e-07	PLEK/WAS/DOCK8/LCP2/VAV1/PRKCD/PTPN6/TLR4/PIK3R5/ENTPD1/LCK/ARRB2/FERMT3/SERPINA1/GNA15/FCER1G/GAS6/PRKCH/SH2B3/PDGFB/SERPING1/CD34/F13A1/MERTK/IRF1/HBB/F11R/APOE/CD40/THBD/F3/GNG2/MYL9/HBG2/PLAT/F5/ITGB3	37	geneontology_Biological_Process	0.0513889	Up
GO:0006898	receptor-mediated endocytosis	36/720	328/18866	1.33929e-08	2.71611e-07	1.98038e-07	SIGLEC1/ITGAM/CD163/STAB1/LILRB1/CD14/ITGB2/FCGR2B/FOLR2/ARHGAP27/ARRB2/FCGR1B/RAMP3/SCARF1/MSR1/FCER1G/CXCL16/FCGR1A/DAB2/SNCA/JCHAIN/HBA2/HBB/HBA1/APOE/MARCO/TGFBR2/PDLIM7/C3/RAMP2/APOL1/APOC1/APOC2/MX1/SFRP4/ITGB3	36	geneontology_Biological_Process	0.05	Up
GO:0031532	actin cytoskeleton reorganization	19/720	105/18866	1.49709e-08	3.0231e-07	2.20421e-07	PLEK/TRPM2/FES/HCLS1/PTK2B/HCK/CSF1R/PARVG/ARHGDIB/MICALL2/RAPGEF3/MINK1/TEK/ESAM/F11R/GMFG/S1PR1/NEDD9/MDK	19	geneontology_Biological_Process	0.0263889	Up
GO:0051607	defense response to virus	31/720	258/18866	1.68545e-08	3.36728e-07	2.45516e-07	RIPK3/IRF5/FGL2/PYCARD/LILRB1/TRIM22/NLRP3/CARD9/PTPRC/DHX58/RNASE6/IL1B/HYAL2/UNC13D/SAMHD1/PTPN22/IRF1/IRF9/CXCL10/CD40/NLRC5/PRF1/OAS1/IFITM2/IRF7/BST2/CXCL9/IFI27/IFI6/MX1/GBP1	31	geneontology_Biological_Process	0.0430556	Up
GO:0060337	type I interferon signaling pathway	18/720	95/18866	1.68901e-08	3.36728e-07	2.45516e-07	IRF5/IRF8/HLA-E/PTPN6/SAMHD1/IRF1/IRF9/NLRC5/OAS1/IFITM2/IRF7/XAF1/BST2/IFI27/IFI6/HLA-C/MX1/EGR1	18	geneontology_Biological_Process	0.025	Up
GO:0071357	cellular response to type I interferon	18/720	95/18866	1.68901e-08	3.36728e-07	2.45516e-07	IRF5/IRF8/HLA-E/PTPN6/SAMHD1/IRF1/IRF9/NLRC5/OAS1/IFITM2/IRF7/XAF1/BST2/IFI27/IFI6/HLA-C/MX1/EGR1	18	geneontology_Biological_Process	0.025	Up
GO:0006874	cellular calcium ion homeostasis	44/720	456/18866	1.72105e-08	3.41668e-07	2.49119e-07	TRPM2/CORO1A/CCR2/CD4/P2RY6/CX3CL1/PTK2B/PTPN6/FPR3/LCK/FPR1/C3AR1/APLNR/RAMP3/PTPRC/GNA15/CCR5/CD52/PLA2G6/C5AR1/SNCA/CCL8/TRPV2/CXCL10/APOE/LPAR6/CD40/S1PR1/CDH5/CX3CR1/CXCL12/CCR1/CAPN3/ATP2A3/CYBA/CCL14/CCL3/TCIRG1/TGM2/GSTM2/CXCL9/CCL5/CXCL11/AGT	44	geneontology_Biological_Process	0.0611111	Up
GO:0032418	lysosome localization	16/720	75/18866	1.79357e-08	3.5457e-07	2.58525e-07	BTK/FES/STXBP2/FGR/LAT2/CD300A/LGALS9/VAMP8/FCER1G/ADGRE2/UNC13D/RAC2/HMOX1/LAT/MILR1/CD84	16	geneontology_Biological_Process	0.0222222	Up
GO:1905523	positive regulation of macrophage migration	10/720	26/18866	1.87923e-08	3.69948e-07	2.69738e-07	CX3CL1/CSF1R/C3AR1/TREM2/CSF1/C5AR1/CX3CR1/CCL3/CCL5/MDK	10	geneontology_Biological_Process	0.0138889	Up
GO:0042742	defense response to bacterium	37/720	348/18866	1.96627e-08	3.85472e-07	2.81056e-07	MPEG1/IRF8/STAB1/LYZ/PYCARD/CD4/PRKCD/SLAMF8/HLA-E/NLRP3/TLR4/FGR/CARD9/S100A9/RNASE6/TREM2/FCER1G/HAVCR2/NAIP/TLR2/PLA2G6/C5AR1/TNFRSF14/JCHAIN/TLR5/CLEC4E/IGLL5/GSDMD/SLC11A1/CYBA/GRN/NLRP1/S100A8/GBP4/GNLY/SLPI/ACP5	37	geneontology_Biological_Process	0.0513889	Up
GO:0032615	interleukin-12 production	14/720	57/18866	2.05826e-08	4.01831e-07	2.92984e-07	IRF5/IRF8/CLEC7A/PRKCD/LTB/LILRB1/TLR4/ARRB2/JAK3/LGALS9/TLR2/CD40/MDK/ACP5	14	geneontology_Biological_Process	0.0194444	Up
GO:0050817	coagulation	37/720	349/18866	2.12139e-08	4.12443e-07	3.00722e-07	PLEK/WAS/DOCK8/LCP2/VAV1/PRKCD/PTPN6/TLR4/PIK3R5/ENTPD1/LCK/ARRB2/FERMT3/SERPINA1/GNA15/FCER1G/GAS6/PRKCH/SH2B3/PDGFB/SERPING1/CD34/F13A1/MERTK/IRF1/HBB/F11R/APOE/CD40/THBD/F3/GNG2/MYL9/HBG2/PLAT/F5/ITGB3	37	geneontology_Biological_Process	0.0513889	Up
GO:2000107	negative regulation of leukocyte apoptotic process	13/720	49/18866	2.41294e-08	4.66129e-07	3.39865e-07	DOCK8/HCLS1/CD74/LILRB1/JAK3/CCR5/FCER1G/GAS6/CD27/MERTK/CXCL12/IRF7/CCL5	13	geneontology_Biological_Process	0.0180556	Up
GO:0071887	leukocyte apoptotic process	19/720	108/18866	2.41733e-08	4.66129e-07	3.39865e-07	RIPK3/BTK/DOCK8/HCLS1/CD74/LILRB1/GIMAP8/JAK3/LGALS9/CCR5/FCER1G/NFKBID/GAS6/CD27/ADAM8/MERTK/CXCL12/IRF7/CCL5	19	geneontology_Biological_Process	0.0263889	Up
GO:0045670	regulation of osteoclast differentiation	15/720	67/18866	2.50257e-08	4.80595e-07	3.50413e-07	LILRB1/INPP5D/TLR4/LILRB4/TYROBP/TREM2/RASSF2/CSF1/CCR1/GPR68/GPR137B/CCL3/BGLAP/FOS/SIGLEC15	15	geneontology_Biological_Process	0.0208333	Up
GO:0002763	positive regulation of myeloid leukocyte differentiation	14/720	58/18866	2.61885e-08	5.00882e-07	3.65205e-07	FES/HLA-DRB1/HCLS1/CD74/CD4/TYROBP/TREM2/CSF1/EVI2B/CCR1/GPR68/LIF/FOS/DCSTAMP	14	geneontology_Biological_Process	0.0194444	Up
GO:0007204	positive regulation of cytosolic calcium ion concentration	35/720	322/18866	2.72911e-08	5.19856e-07	3.79039e-07	TRPM2/CORO1A/CCR2/CD4/P2RY6/CX3CL1/PTK2B/PTPN6/FPR3/LCK/FPR1/C3AR1/APLNR/RAMP3/PTPRC/GNA15/CCR5/CD52/PLA2G6/C5AR1/SNCA/TRPV2/CXCL10/LPAR6/S1PR1/CX3CR1/CCR1/CAPN3/CYBA/CCL3/TGM2/GSTM2/CXCL9/CXCL11/AGT	35	geneontology_Biological_Process	0.0486111	Up
GO:0050731	positive regulation of peptidyl-tyrosine phosphorylation	26/720	195/18866	2.88912e-08	5.48117e-07	3.99645e-07	NCF1/HCLS1/CD74/CD4/IL18/PTK2B/CD3E/CSF1R/ARRB2/PTPRC/TREM2/PTPRJ/GAS6/OSM/FCGR1A/TNFRSF14/PDGFB/CD40/ICAM1/NEDD9/SOCS3/LIF/CCL5/HGF/AGT/ITGB3	26	geneontology_Biological_Process	0.0361111	Up
GO:0046850	regulation of bone remodeling	13/720	50/18866	3.14781e-08	5.94797e-07	4.3368e-07	INPP5D/CSF1R/ADAM8/TNFRSF11A/S1PR1/LTBP3/GPR137B/SPP1/BGLAP/MDK/SIGLEC15/DCSTAMP/ITGB3	13	geneontology_Biological_Process	0.0180556	Up
GO:0002833	positive regulation of response to biotic stimulus	30/720	251/18866	3.23463e-08	6.08758e-07	4.4386e-07	CD209/CLEC10A/PYCARD/LY86/VAV1/PRKCD/HLA-E/TLR4/FCN1/HCK/MNDA/CARD9/DHX58/CD1D/FCER1G/HAVCR2/LAG3/LILRA2/ADAM8/CLEC4E/LY96/NLRC5/CLEC4A/PSMB9/CYBA/GRN/IRF7/PLA2G5/MUC15/CCL5	30	geneontology_Biological_Process	0.0416667	Up
GO:0019886	antigen processing and presentation of exogenous peptide antigen via MHC class II	18/720	99/18866	3.3126e-08	6.16348e-07	4.49394e-07	HLA-DMB/HLA-DRB1/CD74/HLA-DPA1/HLA-DMA/HLA-DPB1/HLA-DRB5/CTSS/FCGR2B/HLA-DOA/HLA-DRA/HLA-DQA1/FCER1G/HLA-DQB1/LAG3/IFI30/HLA-DQB2/HLA-DQA2	18	geneontology_Biological_Process	0.025	Up
GO:0034340	response to type I interferon	18/720	99/18866	3.3126e-08	6.16348e-07	4.49394e-07	IRF5/IRF8/HLA-E/PTPN6/SAMHD1/IRF1/IRF9/NLRC5/OAS1/IFITM2/IRF7/XAF1/BST2/IFI27/IFI6/HLA-C/MX1/EGR1	18	geneontology_Biological_Process	0.025	Up
GO:0043030	regulation of macrophage activation	14/720	59/18866	3.31426e-08	6.16348e-07	4.49394e-07	VSIG4/CD74/CX3CL1/TLR4/FCGR2B/PTPRC/TREM2/HAVCR2/CEBPA/GRN/GPR137B/CCL3/CD200/CST7	14	geneontology_Biological_Process	0.0194444	Up
GO:0051092	positive regulation of NF-kappaB transcription factor activity	23/720	159/18866	3.9324e-08	7.28423e-07	5.3111e-07	RIPK3/BTK/PYCARD/IL18/TRIM22/CX3CL1/NLRP3/TLR4/ITGB2/S100A9/LGALS9/CFLAR/IL1B/TLR2/PRKCH/ADAM8/TNFRSF11A/CD40/ICAM1/CX3CR1/CAPN3/S100A8/AGT	23	geneontology_Biological_Process	0.0319444	Up
GO:0071675	regulation of mononuclear cell migration	13/720	51/18866	4.0784e-08	7.52505e-07	5.48669e-07	CCR2/AIF1/SLAMF8/CSF1R/C3AR1/CSF1/C5AR1/CXCL10/SLIT2/CXCL12/CCR1/CCL5/MDK	13	geneontology_Biological_Process	0.0180556	Up
GO:0032970	regulation of actin filament-based process	40/720	405/18866	4.11279e-08	7.55886e-07	5.51134e-07	PLEK/WAS/TRPM2/CORO1A/FES/HCLS1/PYCARD/PRKCD/CX3CL1/PTK2B/HCK/CSF1R/NCKAP1L/TRIOBP/ARHGDIB/SHANK3/ARHGAP18/ARPC1B/RAPGEF3/GJA5/CAPG/TEK/FCHSD1/KANK3/SH3BP1/RAC2/ESAM/F11R/ARHGEF15/GMFG/S1PR1/ICAM1/SLIT2/CXCL12/BST2/CCN2/MDK/SHANK1/SIGLEC15/SCIN	40	geneontology_Biological_Process	0.0555556	Up
GO:0032732	positive regulation of interleukin-1 production	14/720	60/18866	4.17273e-08	7.63917e-07	5.5699e-07	PYCARD/CLEC7A/NLRP3/TLR4/MNDA/CASP1/TYROBP/LGALS9/HAVCR2/LILRA2/GSDMD/NLRP1/CCL3/EGR1	14	geneontology_Biological_Process	0.0194444	Up
GO:0071692	protein localization to extracellular region	44/720	470/18866	4.19389e-08	7.64816e-07	5.57645e-07	ALOX5/PLEK/HLA-DRB1/LCP2/CD22/CD14/HLA-E/NRROS/NLRP3/TLR4/FGR/FCGR2B/CD33/ABCG1/TREM2/IL1B/TLR2/PLA2G6/TNFSF13B/TLR1/RAPGEF3/GJA5/CLEC5A/SCAMP5/TLR5/CD34/RHBDF1/PSAP/ADAM8/CLEC4E/TANGO2/LTBP2/APOE/CD40/POU2F2/GPR68/SRGN/CD200/TCIRG1/SNCG/CCL5/SYBU/OLFM2/A	44	geneontology_Biological_Process	0.0611111	Up
GO:0002523	leukocyte migration involved in inflammatory response	8/720	16/18866	4.24676e-08	7.71468e-07	5.62496e-07	ALOX5/SLAMF8/CX3CL1/ITGB2/S100A9/ADAM8/S100A8/MDK	8	geneontology_Biological_Process	0.0111111	Up
GO:0045124	regulation of bone resorption	12/720	43/18866	4.50223e-08	8.1473e-07	5.94039e-07	INPP5D/CSF1R/ADAM8/TNFRSF11A/S1PR1/LTBP3/GPR137B/SPP1/BGLAP/SIGLEC15/DCSTAMP/ITGB3	12	geneontology_Biological_Process	0.0166667	Up
GO:0032637	interleukin-8 production	18/720	101/18866	4.57691e-08	8.25071e-07	6.01578e-07	CD74/PYCARD/CLEC7A/CD14/TLR4/FCN1/CD2/CD33/PTPRC/LGALS9/IL1B/HYAL2/TLR2/TLR1/LILRA2/TLR5/PTPN22/F3	18	geneontology_Biological_Process	0.025	Up
GO:2000377	regulation of reactive oxygen species metabolic process	26/720	200/18866	4.87783e-08	8.75961e-07	6.38684e-07	RIPK3/ALOX5/ITGAM/AIF1/CLEC7A/PRKCD/PTK2B/TLR4/ITGB2/TYROBP/SIRPA/CFLAR/IL1B/PDGFB/SNCA/CD34/RAC2/HBB/PON3/TGFBR2/ICAM1/CX3CR1/CYBA/PTX3/ACP5/AGT	26	geneontology_Biological_Process	0.0361111	Up
GO:0032928	regulation of superoxide anion generation	9/720	22/18866	5.20098e-08	9.26917e-07	6.75837e-07	ITGAM/CLEC7A/PRKCD/ITGB2/TYROBP/PON3/CYBA/ACP5/AGT	9	geneontology_Biological_Process	0.0125	Up
GO:0045655	regulation of monocyte differentiation	9/720	22/18866	5.20098e-08	9.26917e-07	6.75837e-07	FES/HLA-DRB1/CD74/CD4/INPP5D/CSF1/GPR68/IRF7/DCSTAMP	9	geneontology_Biological_Process	0.0125	Up
GO:0002755	MyD88-dependent toll-like receptor signaling pathway	11/720	36/18866	5.82068e-08	1.03345e-06	7.5351e-07	BTK/CD300LF/CD14/TLR4/CD300A/TLR2/TLR1/TLR5/IRF1/LY96/IRF7	11	geneontology_Biological_Process	0.0152778	Up
GO:0031341	regulation of cell killing	17/720	92/18866	6.20685e-08	1.09787e-06	8.0048e-07	RIPK3/ITGAM/CLEC7A/VAV1/LILRB1/HLA-E/FCGR2B/ARRB2/TYROBP/PTPRC/LGALS9/CD1D/HAVCR2/LAG3/ICAM1/PRF1/CFH	17	geneontology_Biological_Process	0.0236111	Up
GO:0036336	dendritic cell migration	10/720	29/18866	6.38628e-08	1.12537e-06	8.20535e-07	ALOX5/TRPM2/CCR2/DOCK8/SLAMF8/LGALS9/CCR5/GAS6/CCR1/CCL5	10	geneontology_Biological_Process	0.0138889	Up
GO:0032731	positive regulation of interleukin-1 beta production	13/720	53/18866	6.71495e-08	1.17887e-06	8.59545e-07	PYCARD/CLEC7A/NLRP3/TLR4/MNDA/CASP1/TYROBP/LGALS9/LILRA2/GSDMD/NLRP1/CCL3/EGR1	13	geneontology_Biological_Process	0.0180556	Up
GO:0009306	protein secretion	43/720	462/18866	7.06892e-08	1.2364e-06	9.01491e-07	ALOX5/PLEK/HLA-DRB1/LCP2/CD22/CD14/HLA-E/NLRP3/TLR4/FGR/FCGR2B/CD33/ABCG1/TREM2/IL1B/TLR2/PLA2G6/TNFSF13B/TLR1/RAPGEF3/GJA5/CLEC5A/SCAMP5/TLR5/CD34/RHBDF1/PSAP/ADAM8/CLEC4E/TANGO2/LTBP2/APOE/CD40/POU2F2/GPR68/SRGN/CD200/TCIRG1/SNCG/CCL5/SYBU/OLFM2/AGT	43	geneontology_Biological_Process	0.0597222	Up
GO:0032677	regulation of interleukin-8 production	17/720	93/18866	7.3293e-08	1.2772e-06	9.31235e-07	CD74/PYCARD/CLEC7A/CD14/TLR4/FCN1/CD2/CD33/PTPRC/LGALS9/IL1B/HYAL2/TLR2/TLR1/TLR5/PTPN22/F3	17	geneontology_Biological_Process	0.0236111	Up
GO:0035592	establishment of protein localization to extracellular region	43/720	463/18866	7.51605e-08	1.30228e-06	9.49524e-07	ALOX5/PLEK/HLA-DRB1/LCP2/CD22/CD14/HLA-E/NLRP3/TLR4/FGR/FCGR2B/CD33/ABCG1/TREM2/IL1B/TLR2/PLA2G6/TNFSF13B/TLR1/RAPGEF3/GJA5/CLEC5A/SCAMP5/TLR5/CD34/RHBDF1/PSAP/ADAM8/CLEC4E/TANGO2/LTBP2/APOE/CD40/POU2F2/GPR68/SRGN/CD200/TCIRG1/SNCG/CCL5/SYBU/OLFM2/AGT	43	geneontology_Biological_Process	0.0597222	Up
GO:0034612	response to tumor necrosis factor	34/720	320/18866	7.5286e-08	1.30228e-06	9.49524e-07	PYCARD/TNFSF13/LTB/CD14/CX3CL1/PTK2B/TNFSF12/CASP1/TNFRSF1B/GAS6/HYAL2/CXCL16/CCL4/TNFSF13B/GGT7/TNFRSF14/CD27/CEBPA/CCL8/TNFRSF11A/CCL2/CD40/ICAM1/GGT5/PSMB9/CYBA/CCL14/CCL3/HYAL1/ZFP36/CCL5/CCL18/DCSTAMP/GBP1	34	geneontology_Biological_Process	0.0472222	Up
GO:0051897	positive regulation of protein kinase B signaling	24/720	178/18866	7.91582e-08	1.36425e-06	9.94704e-07	HCLS1/VAV1/IL18/CX3CL1/PIK3R5/PIK3AP1/LCK/ARRB2/RAMP3/PTPRJ/GAS6/OSM/ENG/PDGFB/TEK/RAC2/ADAM8/CD86/CX3CR1/GPX1/F3/CCL3/MEIS3/HGF	24	geneontology_Biological_Process	0.0333333	Up
GO:1903409	reactive oxygen species biosynthetic process	20/720	128/18866	8.2124e-08	1.4102e-06	1.02821e-06	ALOX5/AIF1/CYBB/CLEC7A/PTK2B/TLR4/ITGB2/SIRPA/CFLAR/IL1B/SNCA/CD34/HBB/ICAM1/CX3CR1/CYBA/MAOB/PTX3/ACP5/AGT	20	geneontology_Biological_Process	0.0277778	Up
GO:1902106	negative regulation of leukocyte differentiation	18/720	105/18866	8.52078e-08	1.45783e-06	1.06294e-06	FGL2/CD74/C1QC/TMEM176B/LILRB1/INPP5D/TLR4/TMEM176A/LILRB4/FCGR2B/JAK3/NFKBID/LAG3/IRF1/GPR68/GPR137B/CCL3/MDK	18	geneontology_Biological_Process	0.025	Up
GO:0043491	protein kinase B signaling	31/720	278/18866	9.53409e-08	1.62529e-06	1.18503e-06	HCLS1/VAV1/IL18/CX3CL1/PIK3R5/PIK3AP1/LCK/ARRB2/RAMP3/IL1B/PTPRJ/GAS6/OSM/HYAL2/ENG/SH2B3/PDGFB/TEK/RAC2/ADAM8/MERTK/CCL2/CD40/CD86/CX3CR1/GPX1/F3/CCL3/MEIS3/CCL5/HGF	31	geneontology_Biological_Process	0.0430556	Up
GO:2000379	positive regulation of reactive oxygen species metabolic process	18/720	106/18866	9.90368e-08	1.6822e-06	1.22653e-06	RIPK3/ITGAM/AIF1/CLEC7A/PRKCD/PTK2B/TLR4/ITGB2/TYROBP/IL1B/PDGFB/SNCA/HBB/TGFBR2/ICAM1/CYBA/PTX3/AGT	18	geneontology_Biological_Process	0.025	Up
GO:0032655	regulation of interleukin-12 production	13/720	55/18866	1.07938e-07	1.82679e-06	1.33196e-06	IRF5/IRF8/CLEC7A/LTB/LILRB1/TLR4/ARRB2/JAK3/LGALS9/TLR2/CD40/MDK/ACP5	13	geneontology_Biological_Process	0.0180556	Up
GO:1903426	regulation of reactive oxygen species biosynthetic process	18/720	107/18866	1.14891e-07	1.9375e-06	1.41268e-06	ALOX5/AIF1/CLEC7A/PTK2B/TLR4/ITGB2/SIRPA/CFLAR/IL1B/SNCA/CD34/HBB/ICAM1/CX3CR1/CYBA/PTX3/ACP5/AGT	18	geneontology_Biological_Process	0.025	Up
GO:0052126	movement in host environment	23/720	169/18866	1.23847e-07	2.08108e-06	1.51736e-06	SIGLEC1/CD209/HLA-DRB1/CD74/CD4/TRIM22/FCN1/LGALS9/VAMP8/CCR5/SELPLG/GAS6/HYAL2/TNFRSF14/CLEC5A/F11R/CD86/ICAM1/ANPEP/IFITM2/HYAL1/PTX3/ITGB3	23	geneontology_Biological_Process	0.0319444	Up
GO:0051090	regulation of DNA-binding transcription factor activity	42/720	455/18866	1.2635e-07	2.11558e-06	1.54252e-06	RIPK3/BTK/NFAM1/HCLS1/PYCARD/IL18/TRIM22/CX3CL1/NLRP3/TLR4/HCK/ADORA3/ITGB2/ARRB2/S100A9/PARP10/LGALS9/LPAR5/CFLAR/IL1B/NFKBID/HAVCR2/GAS6/TMIGD3/TLR2/PRKCH/SGK1/SIGIRR/ADAM8/HMOX1/TNFRSF11A/CD40/ICAM1/CX3CR1/STK36/CAPN3/NLRC5/S100A8/CD200/FOS/SFRP4/AGT	42	geneontology_Biological_Process	0.0583333	Up
GO:0050728	negative regulation of inflammatory response	25/720	196/18866	1.28177e-07	2.13856e-06	1.55927e-06	ALOX5/TNFAIP8L2/HLA-DRB1/PYCARD/PRKCD/SLAMF8/CX3CL1/NLRP3/FCGR2B/PTPRC/SIRPA/TNFRSF1B/AOAH/TEK/APOE/CDH5/FNDC4/GPX1/GRN/SOCS3/CD200/CST7/MDK/HGF/ACP5	25	geneontology_Biological_Process	0.0347222	Up
GO:0042100	B cell proliferation	17/720	97/18866	1.39238e-07	2.31489e-06	1.68784e-06	SASH3/BTK/CD74/CD22/PRKCD/INPP5D/TLR4/FCGR2B/MNDA/NCKAP1L/TYROBP/PTPRC/CD300A/TNFSF13B/CD79A/CD40/MZB1	17	geneontology_Biological_Process	0.0236111	Up
GO:0002821	positive regulation of adaptive immune response	18/720	110/18866	1.774e-07	2.93897e-06	2.14287e-06	SASH3/BTK/CCR2/PYCARD/TNFSF13/CD4/IL18/HLA-E/NLRP3/PTPRC/IL1B/CD1D/FCER1G/NFKBID/TNFSF13B/CD40/SLC11A1/C3	18	geneontology_Biological_Process	0.025	Up
GO:0002920	regulation of humoral immune response	20/720	134/18866	1.78298e-07	2.94348e-06	2.14616e-06	C1QA/VSIG4/C1QB/CFI/C1QC/PTPN6/FCGR2B/C3AR1/PTPRC/IL1B/C5AR1/SERPING1/C3/C4B/C2/C4A/CFB/C1R/C1S/CFH	20	geneontology_Biological_Process	0.0277778	Up
GO:0002526	acute inflammatory response	18/720	111/18866	2.04312e-07	3.36115e-06	2.4507e-06	BTK/CD163/HLA-E/NLRP3/FCGR2B/SERPINA1/IL1B/FCER1G/OSM/SIGIRR/ADAM8/TNFRSF11A/ICAM1/ITIH4/C3/F3/S100A8/TREM1	18	geneontology_Biological_Process	0.025	Up
GO:0032663	regulation of interleukin-2 production	12/720	49/18866	2.19439e-07	3.59742e-06	2.62296e-06	SASH3/CCR2/VSIG4/CLEC7A/CD4/PTPRC/IL1B/HAVCR2/CD34/CD86/ZFP36/GBP1	12	geneontology_Biological_Process	0.0166667	Up
GO:0045428	regulation of nitric oxide biosynthetic process	14/720	68/18866	2.23436e-07	3.65023e-06	2.66147e-06	AIF1/CLEC7A/PTK2B/TLR4/ITGB2/SIRPA/IL1B/CD34/HBB/ICAM1/CX3CR1/PTX3/ACP5/AGT	14	geneontology_Biological_Process	0.0194444	Up
GO:0150146	cell junction disassembly	8/720	19/18866	2.25208e-07	3.66644e-06	2.67329e-06	ITGAM/C1QA/C1QB/C1QC/CX3CL1/TREM2/CX3CR1/C3	8	geneontology_Biological_Process	0.0111111	Up
GO:0002705	positive regulation of leukocyte mediated immunity	20/720	138/18866	2.9121e-07	4.72464e-06	3.44484e-06	SASH3/BTK/ITGAM/TNFSF13/VAV1/IL18/PTAFR/HLA-E/NLRP3/FGR/ITGB2/TYROBP/PTPRC/VAMP8/IL1B/CD1D/FCER1G/LAG3/CD40/C3	20	geneontology_Biological_Process	0.0277778	Up
GO:0034103	regulation of tissue remodeling	16/720	91/18866	3.09341e-07	5.00154e-06	3.64674e-06	IL18/INPP5D/CSF1R/ADAM8/TNFRSF11A/CST3/S1PR1/LTBP3/GPR137B/SPP1/BGLAP/MDK/SIGLEC15/DCSTAMP/AGT/ITGB3	16	geneontology_Biological_Process	0.0222222	Up
GO:0110053	regulation of actin filament organization	30/720	278/18866	3.13943e-07	5.05856e-06	3.68832e-06	PLEK/WAS/CORO1A/HCLS1/PYCARD/PRKCD/CX3CL1/PTK2B/HCK/NCKAP1L/TRIOBP/SHANK3/ARHGAP18/ARPC1B/RAPGEF3/CAPG/FCHSD1/KANK3/SH3BP1/ESAM/F11R/ARHGEF15/GMFG/S1PR1/ICAM1/SLIT2/CXCL12/CCN2/SHANK1/SCIN	30	geneontology_Biological_Process	0.0416667	Up
GO:0060401	cytosolic calcium ion transport	23/720	178/18866	3.21188e-07	5.15764e-06	3.76055e-06	TRPM2/CORO1A/CD4/P2RY6/CX3CL1/PTK2B/PTPN6/LCK/APLNR/RAMP3/PTPRC/CCR5/SNCA/TRPV2/CXCL10/CAPN3/ATP2A3/CYBA/CCL3/GSTM2/CXCL9/CCN2/CXCL11	23	geneontology_Biological_Process	0.0319444	Up
GO:0048246	macrophage chemotaxis	11/720	42/18866	3.3643e-07	5.38403e-06	3.92562e-06	SLAMF8/CX3CL1/PTK2B/CSF1R/C3AR1/CSF1/C5AR1/CCL2/CCL3/CCL5/MDK	11	geneontology_Biological_Process	0.0152778	Up
GO:0019058	viral life cycle	34/720	341/18866	3.43668e-07	5.48122e-06	3.99648e-06	SIGLEC1/CD209/HLA-DRB1/CD74/CD4/TRIM22/FCN1/PARP10/LGALS9/VAMP8/CCR5/SELPLG/GAS6/HYAL2/ATG16L2/TNFRSF14/CLEC5A/CCL8/CCL2/F11R/APOE/CD86/ICAM1/ANPEP/OAS1/IFITM2/BST2/HYAL1/IFI27/CCL5/SLPI/MX1/PTX3/ITGB3	34	geneontology_Biological_Process	0.0472222	Up
GO:1902903	regulation of supramolecular fiber organization	36/720	373/18866	3.45749e-07	5.48945e-06	4.00249e-06	PLEK/WAS/CORO1A/FES/HCLS1/PYCARD/PRKCD/CX3CL1/PTK2B/HCK/NCKAP1L/TRIOBP/SHANK3/ARHGAP18/ARPC1B/RAPGEF3/CAPG/SNCA/FCHSD1/KANK3/SH3BP1/ESAM/F11R/ARHGEF15/APOE/GMFG/S1PR1/ICAM1/CDH5/SLIT2/CXCL12/GPX1/MAP2/CCN2/SHANK1/SCIN	36	geneontology_Biological_Process	0.05	Up
GO:0051480	regulation of cytosolic calcium ion concentration	35/720	357/18866	3.46518e-07	5.48945e-06	4.00249e-06	TRPM2/CORO1A/CCR2/CD4/P2RY6/CX3CL1/PTK2B/PTPN6/FPR3/LCK/FPR1/C3AR1/APLNR/RAMP3/PTPRC/GNA15/CCR5/CD52/PLA2G6/C5AR1/SNCA/TRPV2/CXCL10/LPAR6/S1PR1/CX3CR1/CCR1/CAPN3/CYBA/CCL3/TGM2/GSTM2/CXCL9/CXCL11/AGT	35	geneontology_Biological_Process	0.0486111	Up
GO:0002888	positive regulation of myeloid leukocyte mediated immunity	10/720	34/18866	3.51604e-07	5.55134e-06	4.04761e-06	BTK/ITGAM/PTAFR/HLA-E/FGR/ITGB2/TYROBP/VAMP8/FCER1G/C3	10	geneontology_Biological_Process	0.0138889	Up
GO:0019932	second-messenger-mediated signaling	41/720	456/18866	3.60286e-07	5.66939e-06	4.13368e-06	PLEK/TRPM2/BTK/CCR2/CD22/CD4/P2RY6/PTK2B/TBC1D10C/ZAP70/CD3E/FPR1/LAT2/SULT1A4/APLNR/RAMP3/PTPRC/ADCY4/TREM2/CCR5/PTPRJ/CCL4/ADGRE2/PDGFB/RAPGEF3/MCTP1/CXCL10/LAT/APOE/S1PR1/CX3CR1/CCR1/RAMP2/GNG2/CCL3/VCAM1/GSTM2/CXCL9/CXCL11/AGT/GBP1	41	geneontology_Biological_Process	0.0569444	Up
GO:0008154	actin polymerization or depolymerization	26/720	221/18866	3.6326e-07	5.69713e-06	4.15391e-06	PLEK/WAS/CORO1A/HCLS1/AIF1/PYCARD/PRKCD/PTK2B/HCK/NCKAP1L/TRIOBP/ARHGAP18/MICALL2/PSTPIP1/ARPC1B/CAPG/FCHSD1/KANK3/SH3BP1/ESAM/GMFG/ICAM1/SLIT2/CXCL12/GAS7/SCIN	26	geneontology_Biological_Process	0.0361111	Up
GO:0097553	calcium ion transmembrane import into cytosol	20/720	140/18866	3.69432e-07	5.77468e-06	4.21046e-06	TRPM2/CORO1A/P2RY6/CX3CL1/PTK2B/PTPN6/LCK/APLNR/RAMP3/PTPRC/CCR5/SNCA/TRPV2/CXCL10/CAPN3/CYBA/CCL3/GSTM2/CXCL9/CXCL11	20	geneontology_Biological_Process	0.0277778	Up
GO:0019722	calcium-mediated signaling	26/720	222/18866	3.96899e-07	6.18348e-06	4.50852e-06	PLEK/TRPM2/BTK/CCR2/CD22/CD4/P2RY6/PTK2B/TBC1D10C/ZAP70/CD3E/LAT2/SULT1A4/PTPRC/TREM2/CCR5/PTPRJ/CCL4/MCTP1/LAT/CX3CR1/CCR1/CCL3/VCAM1/GSTM2/GBP1	26	geneontology_Biological_Process	0.0361111	Up
GO:0050864	regulation of B cell activation	24/720	195/18866	4.44568e-07	6.89157e-06	5.02481e-06	SASH3/BTK/NFAM1/CD74/TNFSF13/PARP3/CD22/SLAMF8/INPP5D/TBC1D10C/PTPN6/TLR4/FCGR2B/MNDA/SAMSN1/NCKAP1L/TYROBP/PTPRC/CD300A/TNFSF13B/CD27/CD40/IGLL5/MZB1	24	geneontology_Biological_Process	0.0333333	Up
GO:0002576	platelet degranulation	19/720	129/18866	4.45279e-07	6.89157e-06	5.02481e-06	PLEK/CLEC3B/STXBP2/FERMT3/SERPINA1/FCER1G/GAS6/TOR4A/PDGFB/SERPING1/SELENOP/F13A1/PSAP/ITIH4/SRGN/LGALS3BP/HGF/F5/ITGB3	19	geneontology_Biological_Process	0.0263889	Up
GO:0002824	positive regulation of adaptive immune response based on somatic recombination of immune receptors built from immunoglobulin superfamily domains	17/720	105/18866	4.54265e-07	7.00759e-06	5.1094e-06	SASH3/BTK/CCR2/TNFSF13/CD4/IL18/HLA-E/NLRP3/PTPRC/IL1B/CD1D/FCER1G/NFKBID/TNFSF13B/CD40/SLC11A1/C3	17	geneontology_Biological_Process	0.0236111	Up
GO:0050663	cytokine secretion	14/720	72/18866	4.70428e-07	7.23322e-06	5.27391e-06	LCP2/CD14/NLRP3/FGR/FCGR2B/TLR2/TLR1/CLEC5A/SCAMP5/TLR5/CD34/CLEC4E/SRGN/AGT	14	geneontology_Biological_Process	0.0194444	Up
GO:0032633	interleukin-4 production	10/720	35/18866	4.75503e-07	7.28744e-06	5.31344e-06	SASH3/HLA-DRB1/HLA-E/NLRP3/CD3E/LGALS9/CLECL1/FCER1G/HAVCR2/CD86	10	geneontology_Biological_Process	0.0138889	Up
GO:0051209	release of sequestered calcium ion into cytosol	18/720	118/18866	5.24224e-07	8.00803e-06	5.83884e-06	TRPM2/CORO1A/P2RY6/CX3CL1/PTK2B/PTPN6/LCK/APLNR/PTPRC/CCR5/SNCA/CXCL10/CAPN3/CYBA/CCL3/GSTM2/CXCL9/CXCL11	18	geneontology_Biological_Process	0.025	Up
GO:0002887	negative regulation of myeloid leukocyte mediated immunity	6/720	10/18866	5.57393e-07	8.48716e-06	6.18819e-06	CCR2/FCGR2B/CD300A/LGALS9/HMOX1/CD84	6	geneontology_Biological_Process	0.00833333	Up
GO:0042088	T-helper 1 type immune response	11/720	44/18866	5.62212e-07	8.50532e-06	6.20143e-06	CCR2/HLA-DRB1/IL18/TLR4/SEMA4A/JAK3/IL1B/HAVCR2/EBI3/IL18BP/SLC11A1	11	geneontology_Biological_Process	0.0152778	Up
GO:2000404	regulation of T cell migration	11/720	44/18866	5.62212e-07	8.50532e-06	6.20143e-06	RIPK3/CCR2/DOCK8/AIF1/PYCARD/TNFRSF14/ADAM8/CXCL10/CXCL12/CD200/CCL5	11	geneontology_Biological_Process	0.0152778	Up
GO:0040013	negative regulation of locomotion	37/720	397/18866	5.64008e-07	8.50532e-06	6.20143e-06	ARHGAP4/WAS/AIF1/CD74/SLAMF8/CX3CL1/ADORA3/SEMA4A/ARHGDIB/CD300A/PTPRJ/TMIGD3/ACVRL1/HYAL2/SEMA3G/SPINT2/ENG/PTPRM/MCTP1/VASH1/HMOX1/CCL2/APOE/JAG1/CX3CR1/SLIT2/CXCL12/TIE1/NDRG4/SEMA7A/CD200/SULF1/BST2/CYGB/SEMA4B/CLDN5/SEMA6D	37	geneontology_Biological_Process	0.0513889	Up
GO:0046209	nitric oxide metabolic process	15/720	84/18866	5.8675e-07	8.82e-06	6.43087e-06	AIF1/CLEC7A/PTK2B/TLR4/ITGB2/SIRPA/IL1B/TLR2/CD34/HBB/ICAM1/CX3CR1/PTX3/ACP5/AGT	15	geneontology_Biological_Process	0.0208333	Up
GO:0051283	negative regulation of sequestering of calcium ion	18/720	119/18866	5.96013e-07	8.9307e-06	6.51159e-06	TRPM2/CORO1A/P2RY6/CX3CL1/PTK2B/PTPN6/LCK/APLNR/PTPRC/CCR5/SNCA/CXCL10/CAPN3/CYBA/CCL3/GSTM2/CXCL9/CXCL11	18	geneontology_Biological_Process	0.025	Up
GO:0045089	positive regulation of innate immune response	25/720	213/18866	6.35307e-07	9.47573e-06	6.90898e-06	CD209/CLEC10A/PYCARD/VAV1/PRKCD/HLA-E/TLR4/FCN1/HCK/MNDA/CARD9/CD1D/FCER1G/HAVCR2/LAG3/LILRA2/ADAM8/CLEC4E/NLRC5/CLEC4A/PSMB9/IRF7/PLA2G5/MUC15/CCL5	25	geneontology_Biological_Process	0.0347222	Up
GO:0052547	regulation of peptidase activity	41/720	466/18866	6.36415e-07	9.47573e-06	6.90898e-06	PYCARD/CLEC7A/VSIR/NLRP3/LCK/CASP1/CARD9/ARRB2/S100A9/SERPINA1/LGALS9/CFLAR/GAS6/NAIP/SPINT2/RENBP/CSTA/SERPING1/SNCA/CD27/CST3/ITIH4/PCOLCE/C3/C4B/ATP2A3/PSMB9/GPX1/F3/GRN/NLRP1/S100A8/C4A/BST2/CST7/IFI6/SLPI/TNFSF10/CCN2/HGF/AGT	41	geneontology_Biological_Process	0.0569444	Up
GO:0060402	calcium ion transport into cytosol	21/720	158/18866	6.48594e-07	9.62662e-06	7.01899e-06	TRPM2/CORO1A/CD4/P2RY6/CX3CL1/PTK2B/PTPN6/LCK/APLNR/RAMP3/PTPRC/CCR5/SNCA/TRPV2/CXCL10/CAPN3/CYBA/CCL3/GSTM2/CXCL9/CXCL11	21	geneontology_Biological_Process	0.0291667	Up
GO:0032535	regulation of cellular component size	36/720	383/18866	6.5453e-07	9.68416e-06	7.06095e-06	PLEK/ARHGAP4/WAS/CORO1A/HCLS1/PYCARD/VAV1/PRKCD/PTK2B/HCK/SEMA4A/NCKAP1L/TRIOBP/SHANK3/ARHGAP18/SEMA3G/ARPC1B/CAPG/FCHSD1/KANK3/SH3BP1/ESAM/TRPV2/APOE/SLC12A5/GMFG/ICAM1/SLIT2/CXCL12/SHTN1/SEMA7A/SPP1/SEMA4B/MAP2/SEMA6D/SCIN	36	geneontology_Biological_Process	0.05	Up
GO:0006801	superoxide metabolic process	14/720	74/18866	6.68941e-07	9.83552e-06	7.17131e-06	NCF4/ITGAM/NCF1/CYBB/CLEC7A/PRKCD/NRROS/ITGB2/TYROBP/NCF2/PON3/CYBA/ACP5/AGT	14	geneontology_Biological_Process	0.0194444	Up
GO:0034121	regulation of toll-like receptor signaling pathway	14/720	74/18866	6.68941e-07	9.83552e-06	7.17131e-06	CD300LF/CD14/TLR4/ARRB2/CD300A/TLR2/TLR1/LILRA2/TLR5/PTPN22/IRF1/LY96/CYBA/IRF7	14	geneontology_Biological_Process	0.0194444	Up
GO:0051271	negative regulation of cellular component movement	37/720	400/18866	6.77641e-07	9.9324e-06	7.24195e-06	ARHGAP4/WAS/AIF1/CD74/SLAMF8/CX3CL1/ADORA3/SEMA4A/ARHGDIB/CD300A/PTPRJ/TMIGD3/ACVRL1/HYAL2/SEMA3G/SPINT2/ENG/PTPRM/MCTP1/VASH1/HMOX1/CCL2/APOE/JAG1/CX3CR1/SLIT2/CXCL12/TIE1/NDRG4/SEMA7A/CD200/SULF1/BST2/CYGB/SEMA4B/CLDN5/SEMA6D	37	geneontology_Biological_Process	0.0513889	Up
GO:0052548	regulation of endopeptidase activity	39/720	434/18866	7.05618e-07	1.03104e-05	7.51752e-06	PYCARD/CLEC7A/VSIR/NLRP3/LCK/CASP1/CARD9/ARRB2/S100A9/SERPINA1/LGALS9/CFLAR/GAS6/NAIP/SPINT2/RENBP/CSTA/SERPING1/SNCA/CD27/CST3/ITIH4/C3/C4B/ATP2A3/PSMB9/GPX1/F3/NLRP1/S100A8/C4A/BST2/CST7/IFI6/SLPI/TNFSF10/CCN2/HGF/AGT	39	geneontology_Biological_Process	0.0541667	Up
GO:1901214	regulation of neuron death	32/720	321/18866	7.62419e-07	1.11058e-05	8.09752e-06	CORO1A/ITGAM/C1QA/CX3CL1/PTK2B/TLR4/ITGB2/FCGR2B/ARRB2/TYROBP/SULT1A4/TNFRSF1B/NAIP/CSF1/C5AR1/SNCA/CD34/ADAM8/HMOX1/CCL2/APOE/CX3CR1/NRBP2/GRN/CTSZ/CCL3/CD200/SNCG/CCL5/MDK/FOS/EGR1	32	geneontology_Biological_Process	0.0444444	Up
GO:0051282	regulation of sequestering of calcium ion	18/720	121/18866	7.67037e-07	1.11386e-05	8.12142e-06	TRPM2/CORO1A/P2RY6/CX3CL1/PTK2B/PTPN6/LCK/APLNR/PTPRC/CCR5/SNCA/CXCL10/CAPN3/CYBA/CCL3/GSTM2/CXCL9/CXCL11	18	geneontology_Biological_Process	0.025	Up
GO:0001910	regulation of leukocyte mediated cytotoxicity	14/720	75/18866	7.93953e-07	1.1494e-05	8.38054e-06	RIPK3/ITGAM/VAV1/LILRB1/HLA-E/FCGR2B/ARRB2/TYROBP/PTPRC/LGALS9/CD1D/HAVCR2/LAG3/ICAM1	14	geneontology_Biological_Process	0.0194444	Up
GO:0001773	myeloid dendritic cell activation	9/720	29/18866	8.23398e-07	1.18837e-05	8.66469e-06	DOCK2/PYCARD/CD2/SPI1/HAVCR2/BATF3/TGFBR2/BATF/DCSTAMP	9	geneontology_Biological_Process	0.0125	Up
GO:0051651	maintenance of location in cell	25/720	216/18866	8.26389e-07	1.18904e-05	8.66957e-06	TRPM2/CORO1A/CD4/P2RY6/CX3CL1/PTK2B/PTPN6/LCK/APLNR/PTPRC/S100A9/CCR5/SNCA/CXCL10/APOE/GAA/CAPN3/CYBA/CCL3/S100A8/SRGN/GSTM2/CXCL9/CXCL11/SCIN	25	geneontology_Biological_Process	0.0347222	Up
GO:2001057	reactive nitrogen species metabolic process	15/720	87/18866	9.37738e-07	1.34514e-05	9.80772e-06	AIF1/CLEC7A/PTK2B/TLR4/ITGB2/SIRPA/IL1B/TLR2/CD34/HBB/ICAM1/CX3CR1/PTX3/ACP5/AGT	15	geneontology_Biological_Process	0.0208333	Up
GO:0030224	monocyte differentiation	10/720	38/18866	1.10379e-06	1.56898e-05	1.14398e-05	FES/HLA-DRB1/CD74/CD4/INPP5D/CSF1R/CSF1/GPR68/IRF7/DCSTAMP	10	geneontology_Biological_Process	0.0138889	Up
GO:0032733	positive regulation of interleukin-10 production	10/720	38/18866	1.10379e-06	1.56898e-05	1.14398e-05	SASH3/PYCARD/CLEC7A/TLR4/LGALS9/TREM2/FCER1G/TLR2/CD34/HGF	10	geneontology_Biological_Process	0.0138889	Up
GO:1903131	mononuclear cell differentiation	10/720	38/18866	1.10379e-06	1.56898e-05	1.14398e-05	FES/HLA-DRB1/CD74/CD4/INPP5D/CSF1R/CSF1/GPR68/IRF7/DCSTAMP	10	geneontology_Biological_Process	0.0138889	Up
GO:0051208	sequestering of calcium ion	18/720	124/18866	1.10799e-06	1.5702e-05	1.14487e-05	TRPM2/CORO1A/P2RY6/CX3CL1/PTK2B/PTPN6/LCK/APLNR/PTPRC/CCR5/SNCA/CXCL10/CAPN3/CYBA/CCL3/GSTM2/CXCL9/CXCL11	18	geneontology_Biological_Process	0.025	Up
GO:0030225	macrophage differentiation	11/720	47/18866	1.15019e-06	1.62512e-05	1.18491e-05	HLA-DRB1/HCLS1/C1QC/CD4/NRROS/CSF1R/SPI1/TLR2/CSF1/CEBPA/LIF	11	geneontology_Biological_Process	0.0152778	Up
GO:0002702	positive regulation of production of molecular mediator of immune response	16/720	100/18866	1.16127e-06	1.63585e-05	1.19274e-05	SASH3/CD74/TNFSF13/IL18/LILRB1/HLA-E/NLRP3/TLR4/PTPRC/IL1B/FCER1G/TNFRSF14/PTPN22/CD40/SEMA7A/MZB1	16	geneontology_Biological_Process	0.0222222	Up
GO:0045657	positive regulation of monocyte differentiation	6/720	11/18866	1.18658e-06	1.66652e-05	1.2151e-05	FES/HLA-DRB1/CD74/CD4/CSF1/DCSTAMP	6	geneontology_Biological_Process	0.00833333	Up
GO:0072677	eosinophil migration	8/720	23/18866	1.27538e-06	1.78591e-05	1.30215e-05	CX3CL1/CD300A/CCL4/ADAM8/CCL8/CCL2/CCL3/CCL5	8	geneontology_Biological_Process	0.0111111	Up
GO:0071356	cellular response to tumor necrosis factor	30/720	297/18866	1.28018e-06	1.78732e-05	1.30317e-05	PYCARD/TNFSF13/LTB/CX3CL1/PTK2B/TNFSF12/CASP1/TNFRSF1B/GAS6/HYAL2/CCL4/TNFSF13B/TNFRSF14/CD27/CEBPA/CCL8/TNFRSF11A/CCL2/CD40/ICAM1/PSMB9/CYBA/CCL14/CCL3/HYAL1/ZFP36/CCL5/CCL18/DCSTAMP/GBP1	30	geneontology_Biological_Process	0.0416667	Up
GO:0030041	actin filament polymerization	23/720	193/18866	1.35923e-06	1.89206e-05	1.37954e-05	WAS/CORO1A/HCLS1/AIF1/PYCARD/PRKCD/PTK2B/HCK/NCKAP1L/TRIOBP/ARHGAP18/MICALL2/PSTPIP1/ARPC1B/CAPG/FCHSD1/KANK3/ESAM/GMFG/ICAM1/SLIT2/GAS7/SCIN	23	geneontology_Biological_Process	0.0319444	Up
GO:0006911	phagocytosis, engulfment	18/720	126/18866	1.40622e-06	1.9517e-05	1.42303e-05	ITGAM/AIF1/ARHGAP25/BIN2/ITGB2/FCGR2B/NCKAP1L/CD300A/TREM2/MSR1/FCER1G/FCGR1A/SH3BP1/RAC2/MARCO/IGLL5/C3/MFGE8	18	geneontology_Biological_Process	0.025	Up
GO:0006809	nitric oxide biosynthetic process	14/720	79/18866	1.53011e-06	2.1174e-05	1.54384e-05	AIF1/CLEC7A/PTK2B/TLR4/ITGB2/SIRPA/IL1B/CD34/HBB/ICAM1/CX3CR1/PTX3/ACP5/AGT	14	geneontology_Biological_Process	0.0194444	Up
GO:0050858	negative regulation of antigen receptor-mediated signaling pathway	9/720	31/18866	1.54763e-06	2.12913e-05	1.5524e-05	CD22/PTPN6/LILRB4/FCGR2B/CD300A/PTPRJ/LPXN/PTPN22/GBP1	9	geneontology_Biological_Process	0.0125	Up
GO:2000406	positive regulation of T cell migration	9/720	31/18866	1.54763e-06	2.12913e-05	1.5524e-05	CCR2/DOCK8/AIF1/PYCARD/TNFRSF14/ADAM8/CXCL10/CXCL12/CCL5	9	geneontology_Biological_Process	0.0125	Up
GO:0030449	regulation of complement activation	17/720	115/18866	1.69398e-06	2.32367e-05	1.69424e-05	C1QA/VSIG4/C1QB/CFI/C1QC/C3AR1/IL1B/C5AR1/SERPING1/C3/C4B/C2/C4A/CFB/C1R/C1S/CFH	17	geneontology_Biological_Process	0.0236111	Up
GO:0051091	positive regulation of DNA-binding transcription factor activity	28/720	270/18866	1.71617e-06	2.34726e-05	1.71144e-05	RIPK3/BTK/NFAM1/HCLS1/PYCARD/IL18/TRIM22/CX3CL1/NLRP3/TLR4/ITGB2/S100A9/LGALS9/LPAR5/CFLAR/IL1B/TLR2/PRKCH/ADAM8/TNFRSF11A/CD40/ICAM1/CX3CR1/STK36/CAPN3/S100A8/CD200/AGT	28	geneontology_Biological_Process	0.0388889	Up
GO:0050854	regulation of antigen receptor-mediated signaling pathway	13/720	69/18866	1.75705e-06	2.39621e-05	1.74713e-05	NFAM1/CD22/PTPN6/LILRB4/FCGR2B/LCK/PTPRC/CD300A/PTPRJ/LPXN/PRKCH/PTPN22/GBP1	13	geneontology_Biological_Process	0.0180556	Up
GO:0007249	I-kappaB kinase/NF-kappaB signaling	29/720	286/18866	1.77599e-06	2.41503e-05	1.76086e-05	RIPK3/BTK/HLA-DRB1/CD74/PYCARD/CD4/CD14/TRIM22/CX3CL1/TLR4/CASP1/CARD9/SIRPA/LGALS9/CFLAR/IL1B/NFKBID/TLR2/PLEKHG5/HMOX1/LY96/CD40/CX3CR1/APOL3/CAPN3/BST2/TGM2/SECTM1/TNFSF10	29	geneontology_Biological_Process	0.0402778	Up
GO:0042590	antigen processing and presentation of exogenous peptide antigen via MHC class I	14/720	80/18866	1.79042e-06	2.42765e-05	1.77006e-05	NCF4/NCF1/CYBB/HLA-E/FCGR1B/VAMP8/FCER1G/NCF2/FCGR1A/IFI30/CLEC4A/PSMB9/CYBA/HLA-C	14	geneontology_Biological_Process	0.0194444	Up
GO:0002407	dendritic cell chemotaxis	8/720	24/18866	1.84926e-06	2.49305e-05	1.81774e-05	TRPM2/CCR2/SLAMF8/LGALS9/CCR5/GAS6/CCR1/CCL5	8	geneontology_Biological_Process	0.0111111	Up
GO:0032753	positive regulation of interleukin-4 production	8/720	24/18866	1.84926e-06	2.49305e-05	1.81774e-05	SASH3/HLA-E/NLRP3/CD3E/LGALS9/FCER1G/HAVCR2/CD86	8	geneontology_Biological_Process	0.0111111	Up
GO:0038093	Fc receptor signaling pathway	26/720	241/18866	1.91933e-06	2.58013e-05	1.88123e-05	WAS/BTK/LCP2/MYO1G/VAV1/PRKCD/FCGR2A/HCK/FGR/FCGR2B/NCKAP1L/LAT2/FCGR1B/PTPRC/FCER1A/PTPRJ/FCER1G/PLA2G6/CD247/FCGR1A/ARPC1B/FCGR3A/CLEC4E/LAT/PSMB9/FOS	26	geneontology_Biological_Process	0.0361111	Up
GO:0032673	regulation of interleukin-4 production	9/720	32/18866	2.08069e-06	2.78115e-05	2.0278e-05	SASH3/HLA-DRB1/HLA-E/NLRP3/CD3E/LGALS9/FCER1G/HAVCR2/CD86	9	geneontology_Biological_Process	0.0125	Up
GO:0050869	negative regulation of B cell activation	9/720	32/18866	2.08069e-06	2.78115e-05	2.0278e-05	BTK/PARP3/INPP5D/TBC1D10C/FCGR2B/MNDA/SAMSN1/TYROBP/CD300A	9	geneontology_Biological_Process	0.0125	Up
GO:0002468	dendritic cell antigen processing and presentation	6/720	12/18866	2.2964e-06	3.03499e-05	2.21288e-05	FGL2/CD74/FCGR2B/CD68/SLC11A1/CLEC4A	6	geneontology_Biological_Process	0.00833333	Up
GO:0032490	detection of molecule of bacterial origin	6/720	12/18866	2.2964e-06	3.03499e-05	2.21288e-05	TLR4/TREM2/TLR2/TLR1/LY96/C4B	6	geneontology_Biological_Process	0.00833333	Up
GO:0033004	negative regulation of mast cell activation	6/720	12/18866	2.2964e-06	3.03499e-05	2.21288e-05	CD300LF/CD300A/LGALS9/HMOX1/MILR1/CD84	6	geneontology_Biological_Process	0.00833333	Up
GO:0043301	negative regulation of leukocyte degranulation	6/720	12/18866	2.2964e-06	3.03499e-05	2.21288e-05	CCR2/FCGR2B/CD300A/LGALS9/HMOX1/CD84	6	geneontology_Biological_Process	0.00833333	Up
GO:0033627	cell adhesion mediated by integrin	13/720	71/18866	2.46228e-06	3.2451e-05	2.36608e-05	PTPN6/ITGB2/CD3E/NCKAP1L/FERMT3/LPXN/ICAM1/PODXL/LIF/CCL5/ITGA11/ITGB3/COL16A1	13	geneontology_Biological_Process	0.0180556	Up
GO:0043031	negative regulation of macrophage activation	7/720	18/18866	2.52236e-06	3.315e-05	2.41704e-05	VSIG4/CX3CL1/FCGR2B/PTPRC/GRN/CD200/CST7	7	geneontology_Biological_Process	0.00972222	Up
GO:1903707	negative regulation of hemopoiesis	20/720	158/18866	2.58365e-06	3.37845e-05	2.46331e-05	FGL2/CD74/C1QC/TMEM176B/LILRB1/INPP5D/PTK2B/TLR4/TMEM176A/LILRB4/FCGR2B/JAK3/NFKBID/LAG3/IRF1/GPR68/GPR137B/CCL3/ZFP36/MDK	20	geneontology_Biological_Process	0.0277778	Up
GO:1904035	regulation of epithelial cell apoptotic process	15/720	94/18866	2.585e-06	3.37845e-05	2.46331e-05	ARRB2/CFLAR/GAS6/TEK/COL18A1/HMOX1/CCL2/CD40/ICAM1/CDH5/RAMP2/ECSCR/ZFP36/MDK/SFRP4	15	geneontology_Biological_Process	0.0208333	Up
GO:0007160	cell-matrix adhesion	25/720	230/18866	2.63095e-06	3.42898e-05	2.50015e-05	SIGLEC1/CX3CL1/PTK2B/ITGB2/CD3E/ITGAL/PARVG/FERMT3/PTPRJ/ACVRL1/CSF1/ZYX/MINK1/TEK/CD34/JAG1/SNED1/EPDR1/LYVE1/COL5A3/VCAM1/CCN2/ITGA11/ITGB3/COL16A1	25	geneontology_Biological_Process	0.0347222	Up
GO:0051047	positive regulation of secretion	32/720	340/18866	2.65249e-06	3.4475e-05	2.51365e-05	ITGAM/HLA-DRB1/CD14/PTAFR/HLA-E/TLR4/FGR/ITGB2/CD33/ABCG1/VAMP8/TREM2/IL1B/FCER1G/TLR2/PLA2G6/UNC13D/SNCA/CLEC5A/SCAMP5/CD34/ADAM8/CLEC4E/TNFRSF11A/CXCL12/GPR68/CYBA/S100A8/SPP1/SYBU/SCIN/AGT	32	geneontology_Biological_Process	0.0444444	Up
GO:0051235	maintenance of location	31/720	324/18866	2.69551e-06	3.49377e-05	2.54739e-05	TRPM2/CORO1A/CD4/P2RY6/CX3CL1/PTK2B/PTPN6/NRROS/LCK/APLNR/PTPRC/S100A9/ABCG1/IL1B/CCR5/MSR1/SNCA/CXCL10/APOE/GAA/C3/CAPN3/CYBA/CCL3/S100A8/SRGN/GSTM2/CXCL9/CXCL11/SCIN/ITGB3	31	geneontology_Biological_Process	0.0430556	Up
GO:0042267	natural killer cell mediated cytotoxicity	12/720	61/18866	2.72257e-06	3.51915e-05	2.56589e-05	CORO1A/VAV1/IL18/LILRB1/HLA-E/PTPN6/ARRB2/LGALS9/HAVCR2/LAG3/UNC13D/SLAMF7	12	geneontology_Biological_Process	0.0166667	Up
GO:1902622	regulation of neutrophil migration	10/720	42/18866	2.99225e-06	3.85713e-05	2.81232e-05	CD74/SLAMF8/C3AR1/NCKAP1L/MPP1/C5AR1/RAC2/ADAM8/SLIT2/MDK	10	geneontology_Biological_Process	0.0138889	Up
GO:0034113	heterotypic cell-cell adhesion	12/720	62/18866	3.26006e-06	4.17945e-05	3.04734e-05	LILRB2/ITGB2/CD2/LCK/PTPRC/ITGAX/SIRPA/IL1B/CD1D/CD200/VCAM1/ITGB3	12	geneontology_Biological_Process	0.0166667	Up
GO:0045824	negative regulation of innate immune response	12/720	62/18866	3.26006e-06	4.17945e-05	3.04734e-05	VSIG4/SLAMF8/LILRB1/HLA-E/ARRB2/DHX58/LGALS9/HAVCR2/SERPING1/SAMHD1/NLRC5/GRN	12	geneontology_Biological_Process	0.0166667	Up
GO:0070997	neuron death	33/720	360/18866	3.29453e-06	4.21217e-05	3.07119e-05	CORO1A/ITGAM/C1QA/CX3CL1/PTK2B/TLR4/ITGB2/FCGR2B/ARRB2/TYROBP/SULT1A4/TNFRSF1B/NAIP/CSF1/C5AR1/SNCA/CD34/ADAM8/HMOX1/CCL2/APOE/CX3CR1/NRBP2/GRN/CTSZ/NLRP1/CCL3/CD200/SNCG/CCL5/MDK/FOS/EGR1	33	geneontology_Biological_Process	0.0458333	Up
GO:0071622	regulation of granulocyte chemotaxis	11/720	52/18866	3.35235e-06	4.27447e-05	3.11662e-05	CD74/CSF1R/C3AR1/NCKAP1L/MPP1/CSF1/C5AR1/RAC2/SLIT2/CCL5/MDK	11	geneontology_Biological_Process	0.0152778	Up
GO:0002709	regulation of T cell mediated immunity	13/720	73/18866	3.408e-06	4.33369e-05	3.1598e-05	RIPK3/SASH3/WAS/CCR2/IL18/LILRB1/HLA-E/NLRP3/FCGR2B/PTPRC/TNFRSF1B/IL1B/CD1D	13	geneontology_Biological_Process	0.0180556	Up
GO:0070232	regulation of T cell apoptotic process	9/720	34/18866	3.63327e-06	4.6077e-05	3.35958e-05	RIPK3/DOCK8/GIMAP8/JAK3/LGALS9/NFKBID/CD27/ADAM8/CCL5	9	geneontology_Biological_Process	0.0125	Up
GO:0090025	regulation of monocyte chemotaxis	8/720	26/18866	3.67063e-06	4.64256e-05	3.385e-05	CCR2/AIF1/SLAMF8/CXCL10/SLIT2/CXCL12/CCR1/CCL5	8	geneontology_Biological_Process	0.0111111	Up
GO:0008064	regulation of actin polymerization or depolymerization	22/720	190/18866	3.7066e-06	4.67549e-05	3.40901e-05	PLEK/WAS/CORO1A/HCLS1/PYCARD/PRKCD/PTK2B/HCK/NCKAP1L/TRIOBP/ARHGAP18/ARPC1B/CAPG/FCHSD1/KANK3/SH3BP1/ESAM/GMFG/ICAM1/SLIT2/CXCL12/SCIN	22	geneontology_Biological_Process	0.0305556	Up
GO:0150077	regulation of neuroinflammatory response	10/720	43/18866	3.76668e-06	4.73857e-05	3.455e-05	IL18/CX3CL1/PTPRC/TNFRSF1B/TREM2/IL1B/GRN/CCL3/CD200/CST7	10	geneontology_Biological_Process	0.0138889	Up
GO:0030101	natural killer cell activation	14/720	85/18866	3.78199e-06	4.74514e-05	3.45979e-05	CORO1A/IL18/HLA-E/FGR/ITGB2/CD2/TYROBP/PTPRC/HAVCR2/GAS6/UNC13D/MERTK/PTPN22/SLAMF7	14	geneontology_Biological_Process	0.0194444	Up
GO:0010959	regulation of metal ion transport	35/720	396/18866	3.80098e-06	4.75628e-05	3.46791e-05	CORO1A/LILRB2/CD4/P2RY6/LILRB1/CX3CL1/PTK2B/PTPN6/ARRB2/APLNR/CD33/RAMP3/TREM2/PLA2G6/CCL4/PDGFB/LILRA2/SNCA/TRPV2/CXCL10/CCL2/SCN1B/ICAM1/CXCL12/CCR1/CAPN3/CYBA/CD84/CCL3/GSTM2/CXCL9/CCL5/CXCL11/HSPA2/AGT	35	geneontology_Biological_Process	0.0486111	Up
GO:0099024	plasma membrane invagination	18/720	135/18866	3.86229e-06	4.79483e-05	3.49602e-05	ITGAM/AIF1/ARHGAP25/BIN2/ITGB2/FCGR2B/NCKAP1L/CD300A/TREM2/MSR1/FCER1G/FCGR1A/SH3BP1/RAC2/MARCO/IGLL5/C3/MFGE8	18	geneontology_Biological_Process	0.025	Up
GO:0032930	positive regulation of superoxide anion generation	7/720	19/18866	3.86236e-06	4.79483e-05	3.49602e-05	ITGAM/CLEC7A/PRKCD/ITGB2/TYROBP/CYBA/AGT	7	geneontology_Biological_Process	0.00972222	Up
GO:0098543	detection of other organism	7/720	19/18866	3.86236e-06	4.79483e-05	3.49602e-05	HLA-DRB1/CLEC7A/TLR4/CD1D/NAIP/TLR2/TLR1	7	geneontology_Biological_Process	0.00972222	Up
GO:0030832	regulation of actin filament length	22/720	191/18866	4.04173e-06	5.0043e-05	3.64875e-05	PLEK/WAS/CORO1A/HCLS1/PYCARD/PRKCD/PTK2B/HCK/NCKAP1L/TRIOBP/ARHGAP18/ARPC1B/CAPG/FCHSD1/KANK3/SH3BP1/ESAM/GMFG/ICAM1/SLIT2/CXCL12/SCIN	22	geneontology_Biological_Process	0.0305556	Up
GO:0061756	leukocyte adhesion to vascular endothelial cell	11/720	53/18866	4.08589e-06	5.01734e-05	3.65826e-05	ALOX5/CCR2/PTAFR/ITGB2/SELL/SELPLG/ICAM1/CX3CR1/CXCL12/VCAM1/MDK	11	geneontology_Biological_Process	0.0152778	Up
GO:0035723	interleukin-15-mediated signaling pathway	6/720	13/18866	4.12691e-06	5.01734e-05	3.65826e-05	CD4/STAT5A/JAK3/IL2RG/IL15RA/IL2RB	6	geneontology_Biological_Process	0.00833333	Up
GO:0071350	cellular response to interleukin-15	6/720	13/18866	4.12691e-06	5.01734e-05	3.65826e-05	CD4/STAT5A/JAK3/IL2RG/IL15RA/IL2RB	6	geneontology_Biological_Process	0.00833333	Up
GO:0072683	T cell extravasation	6/720	13/18866	4.12691e-06	5.01734e-05	3.65826e-05	RIPK3/CCR2/ITGAL/CCL2/F11R/ICAM1	6	geneontology_Biological_Process	0.00833333	Up
GO:1902563	regulation of neutrophil activation	6/720	13/18866	4.12691e-06	5.01734e-05	3.65826e-05	ITGAM/PTAFR/ITGB2/FCGR2B/CD300A/GRN	6	geneontology_Biological_Process	0.00833333	Up
GO:1903977	positive regulation of glial cell migration	6/720	13/18866	4.12691e-06	5.01734e-05	3.65826e-05	CCR2/CX3CL1/TREM2/CSF1/CX3CR1/CCL3	6	geneontology_Biological_Process	0.00833333	Up
GO:2001198	regulation of dendritic cell differentiation	6/720	13/18866	4.12691e-06	5.01734e-05	3.65826e-05	LILRB2/TMEM176B/LILRB1/TMEM176A/FCGR2B/LGALS9	6	geneontology_Biological_Process	0.00833333	Up
GO:0002791	regulation of peptide secretion	34/720	381/18866	4.23327e-06	5.13339e-05	3.74287e-05	ALOX5/HLA-DRB1/CD74/CD22/CD14/HLA-E/TLR4/FGR/FCGR2B/CD33/ABCG1/TREM2/IL1B/TLR2/PLA2G6/TLR1/RAPGEF3/GJA5/CLEC5A/SCAMP5/TLR5/CD34/RHBDF1/ADAM8/CLEC4E/APOE/CD40/GPR68/S100A8/SRGN/CD200/TCIRG1/CCL5/SYBU	34	geneontology_Biological_Process	0.0472222	Up
GO:0001776	leukocyte homeostasis	14/720	86/18866	4.36104e-06	5.27473e-05	3.84593e-05	RIPK3/CORO1A/CCR2/CD74/NCKAP1L/JAK3/LGALS9/FCER1G/SH2B3/TNFSF13B/MERTK/LAT/SLC40A1/TCIRG1	14	geneontology_Biological_Process	0.0194444	Up
GO:0002832	negative regulation of response to biotic stimulus	15/720	98/18866	4.41153e-06	5.32211e-05	3.88048e-05	FGL2/VSIG4/SLAMF8/LILRB1/HLA-E/ARRB2/DHX58/LGALS9/HAVCR2/SIGIRR/SERPING1/LILRA2/SAMHD1/NLRC5/GRN	15	geneontology_Biological_Process	0.0208333	Up
GO:2000146	negative regulation of cell motility	33/720	365/18866	4.42994e-06	5.33066e-05	3.88671e-05	ARHGAP4/WAS/AIF1/CD74/SLAMF8/CX3CL1/ADORA3/ARHGDIB/CD300A/PTPRJ/TMIGD3/ACVRL1/HYAL2/SPINT2/ENG/PTPRM/MCTP1/VASH1/HMOX1/CCL2/APOE/JAG1/CX3CR1/SLIT2/CXCL12/TIE1/NDRG4/CD200/SULF1/BST2/CYGB/CLDN5/SEMA6D	33	geneontology_Biological_Process	0.0458333	Up
GO:0001885	endothelial cell development	12/720	64/18866	4.62202e-06	5.54761e-05	4.04489e-05	IL1B/COL15A1/ENG/RAPGEF3/NOTCH4/COL18A1/ROBO4/F11R/ICAM1/CDH5/GPX1/CLDN5	12	geneontology_Biological_Process	0.0166667	Up
GO:0032602	chemokine production	13/720	75/18866	4.66224e-06	5.58164e-05	4.0697e-05	CD74/CLEC7A/IL18/TLR4/IL17RA/SIRPA/S100A9/LGALS9/TREM2/IL1B/HAVCR2/TLR2/S100A8	13	geneontology_Biological_Process	0.0180556	Up
GO:0060249	anatomical structure homeostasis	39/720	469/18866	4.6944e-06	5.60587e-05	4.08737e-05	SASH3/CORO1A/CCR2/LYZ/PARP3/CX3CL1/INPP5D/PTK2B/TLR4/CSF1R/POLD4/CSF1/JCHAIN/CD34/RAC2/ADAM8/ESAM/TNFRSF11A/F11R/S1PR1/CDH5/LTBP3/GAA/CAPN3/EPAS1/GPR137B/PKIB/LDB2/SPP1/TCIRG1/BGLAP/SNX10/CLDN5/CCN2/SIGLEC15/DCSTAMP/ACP5/ITGB3/CTSK	39	geneontology_Biological_Process	0.0541667	Up
GO:0051896	regulation of protein kinase B signaling	26/720	253/18866	4.72365e-06	5.61552e-05	4.09441e-05	HCLS1/VAV1/IL18/CX3CL1/PIK3R5/PIK3AP1/LCK/ARRB2/RAMP3/PTPRJ/GAS6/OSM/HYAL2/ENG/SH2B3/PDGFB/TEK/RAC2/ADAM8/CD86/CX3CR1/GPX1/F3/CCL3/MEIS3/HGF	26	geneontology_Biological_Process	0.0361111	Up
GO:0032735	positive regulation of interleukin-12 production	9/720	35/18866	4.72635e-06	5.61552e-05	4.09441e-05	IRF5/IRF8/CLEC7A/LTB/TLR4/LGALS9/TLR2/CD40/MDK	9	geneontology_Biological_Process	0.0125	Up
GO:0010524	positive regulation of calcium ion transport into cytosol	11/720	54/18866	4.95594e-06	5.87348e-05	4.28249e-05	CD4/P2RY6/CX3CL1/APLNR/RAMP3/SNCA/CXCL10/CAPN3/GSTM2/CXCL9/CXCL11	11	geneontology_Biological_Process	0.0152778	Up
GO:0002474	antigen processing and presentation of peptide antigen via MHC class I	15/720	99/18866	5.01882e-06	5.91818e-05	4.31509e-05	NCF4/NCF1/CYBB/HLA-E/FCGR1B/VAMP8/FCER1G/NCF2/FCGR1A/IFI30/TAPBPL/CLEC4A/PSMB9/CYBA/HLA-C	15	geneontology_Biological_Process	0.0208333	Up
GO:0062207	regulation of pattern recognition receptor signaling pathway	15/720	99/18866	5.01882e-06	5.91818e-05	4.31509e-05	CD300LF/CD14/TLR4/ARRB2/DHX58/CD300A/TLR2/TLR1/LILRA2/TLR5/PTPN22/IRF1/LY96/CYBA/IRF7	15	geneontology_Biological_Process	0.0208333	Up
GO:2000116	regulation of cysteine-type endopeptidase activity	25/720	239/18866	5.24056e-06	6.16421e-05	4.49447e-05	PYCARD/CLEC7A/NLRP3/LCK/CASP1/CARD9/ARRB2/S100A9/LGALS9/CFLAR/GAS6/NAIP/SNCA/CD27/ATP2A3/PSMB9/GPX1/F3/NLRP1/S100A8/CST7/IFI6/TNFSF10/CCN2/HGF	25	geneontology_Biological_Process	0.0347222	Up
GO:0050708	regulation of protein secretion	32/720	352/18866	5.50423e-06	6.4582e-05	4.70883e-05	ALOX5/HLA-DRB1/CD22/CD14/HLA-E/TLR4/FGR/FCGR2B/CD33/ABCG1/TREM2/IL1B/TLR2/PLA2G6/TLR1/RAPGEF3/GJA5/CLEC5A/SCAMP5/TLR5/CD34/RHBDF1/ADAM8/CLEC4E/APOE/CD40/GPR68/SRGN/CD200/TCIRG1/CCL5/SYBU	32	geneontology_Biological_Process	0.0444444	Up
GO:0001911	negative regulation of leukocyte mediated cytotoxicity	7/720	20/18866	5.74673e-06	6.72524e-05	4.90353e-05	LILRB1/HLA-E/FCGR2B/ARRB2/PTPRC/LGALS9/HAVCR2	7	geneontology_Biological_Process	0.00972222	Up
GO:0014068	positive regulation of phosphatidylinositol 3-kinase signaling	14/720	88/18866	5.76041e-06	6.72524e-05	4.90353e-05	NCF1/HCLS1/IL18/PTPN6/PIK3R5/FGR/PIK3AP1/HCST/OSM/PDGFB/TEK/CCL5/HGF/AGT	14	geneontology_Biological_Process	0.0194444	Up
GO:0045429	positive regulation of nitric oxide biosynthetic process	10/720	45/18866	5.84933e-06	6.81215e-05	4.9669e-05	AIF1/CLEC7A/PTK2B/TLR4/ITGB2/IL1B/HBB/ICAM1/PTX3/AGT	10	geneontology_Biological_Process	0.0138889	Up
GO:0002720	positive regulation of cytokine production involved in immune response	11/720	55/18866	5.98349e-06	6.95119e-05	5.06828e-05	SASH3/CD74/IL18/LILRB1/HLA-E/NLRP3/TLR4/IL1B/FCER1G/TNFRSF14/SEMA7A	11	geneontology_Biological_Process	0.0152778	Up
GO:0010543	regulation of platelet activation	9/720	36/18866	6.0898e-06	7.05726e-05	5.14562e-05	PLEK/PRKCD/TLR4/FCER1G/SH2B3/PDGFB/F11R/APOE/THBD	9	geneontology_Biological_Process	0.0125	Up
GO:0070555	response to interleukin-1	23/720	211/18866	6.25327e-06	7.2289e-05	5.27076e-05	PYCARD/CX3CL1/SIRPA/LGALS9/IL1B/HYAL2/CCL4/MAPK13/SNCA/CCL8/TNFRSF11A/CCL2/CD40/ICAM1/PSMB9/CYBA/CCL14/CCL3/HYAL1/CCL5/CCL18/EGR1/GBP1	23	geneontology_Biological_Process	0.0319444	Up
GO:0002228	natural killer cell mediated immunity	12/720	66/18866	6.4609e-06	7.43297e-05	5.41955e-05	CORO1A/VAV1/IL18/LILRB1/HLA-E/PTPN6/ARRB2/LGALS9/HAVCR2/LAG3/UNC13D/SLAMF7	12	geneontology_Biological_Process	0.0166667	Up
GO:0010522	regulation of calcium ion transport into cytosol	15/720	101/18866	6.46139e-06	7.43297e-05	5.41955e-05	CORO1A/CD4/P2RY6/CX3CL1/PTK2B/PTPN6/APLNR/RAMP3/SNCA/CXCL10/CAPN3/CYBA/GSTM2/CXCL9/CXCL11	15	geneontology_Biological_Process	0.0208333	Up
GO:0006979	response to oxidative stress	38/720	458/18866	6.5403e-06	7.50539e-05	5.47236e-05	RIPK3/ALOX5/TRPM2/NCF4/BTK/NCF1/AIF1/CYBB/PRKCD/PTGS1/PTK2B/TLR4/SIRPA/CFLAR/HYAL2/NCF2/PON2/GGT7/MAPK13/SNCA/MCTP1/SELENOP/HBA2/PSAP/NEIL1/HBB/HMOX1/HBA1/APOE/CST3/EPAS1/GPX1/CYBA/CYGB/HYAL1/HGF/FOS/GPX3	38	geneontology_Biological_Process	0.0527778	Up
GO:0051701	interaction with host	23/720	212/18866	6.76728e-06	7.74697e-05	5.6485e-05	SIGLEC1/CD209/HLA-DRB1/CD74/CD4/TRIM22/FCN1/LGALS9/VAMP8/CCR5/SELPLG/GAS6/HYAL2/TNFRSF14/CLEC5A/F11R/CD86/ICAM1/ANPEP/IFITM2/HYAL1/PTX3/ITGB3	23	geneontology_Biological_Process	0.0319444	Up
GO:0045059	positive thymic T cell selection	6/720	14/18866	6.98883e-06	7.96185e-05	5.80517e-05	DOCK2/CD74/ZAP70/CD3E/PTPRC/CD3D	6	geneontology_Biological_Process	0.00833333	Up
GO:0070672	response to interleukin-15	6/720	14/18866	6.98883e-06	7.96185e-05	5.80517e-05	CD4/STAT5A/JAK3/IL2RG/IL15RA/IL2RB	6	geneontology_Biological_Process	0.00833333	Up
GO:0070228	regulation of lymphocyte apoptotic process	11/720	56/18866	7.19205e-06	8.17358e-05	5.95955e-05	RIPK3/BTK/DOCK8/CD74/GIMAP8/JAK3/LGALS9/NFKBID/CD27/ADAM8/CCL5	11	geneontology_Biological_Process	0.0152778	Up
GO:1904407	positive regulation of nitric oxide metabolic process	10/720	46/18866	7.22075e-06	8.18642e-05	5.96891e-05	AIF1/CLEC7A/PTK2B/TLR4/ITGB2/IL1B/HBB/ICAM1/PTX3/AGT	10	geneontology_Biological_Process	0.0138889	Up
GO:0090322	regulation of superoxide metabolic process	9/720	37/18866	7.77661e-06	8.79542e-05	6.41295e-05	ITGAM/CLEC7A/PRKCD/ITGB2/TYROBP/PON3/CYBA/ACP5/AGT	9	geneontology_Biological_Process	0.0125	Up
GO:0038094	Fc-gamma receptor signaling pathway	18/720	142/18866	7.95013e-06	8.97011e-05	6.54032e-05	WAS/MYO1G/VAV1/PRKCD/FCGR2A/HCK/FGR/FCGR2B/NCKAP1L/PTPRC/PTPRJ/FCER1G/PLA2G6/CD247/FCGR1A/ARPC1B/FCGR3A/CLEC4E	18	geneontology_Biological_Process	0.025	Up
GO:0043281	regulation of cysteine-type endopeptidase activity involved in apoptotic process	23/720	215/18866	8.54799e-06	9.62159e-05	7.01533e-05	PYCARD/CLEC7A/NLRP3/LCK/CASP1/CARD9/ARRB2/S100A9/LGALS9/CFLAR/GAS6/NAIP/SNCA/CD27/ATP2A3/GPX1/F3/NLRP1/S100A8/IFI6/TNFSF10/CCN2/HGF	23	geneontology_Biological_Process	0.0319444	Up
GO:0042743	hydrogen peroxide metabolic process	11/720	57/18866	8.60789e-06	9.66589e-05	7.04763e-05	CYBB/SNCA/HBA2/RAC2/HBB/HBA1/GPX1/CYBA/MAOB/HBG2/GPX3	11	geneontology_Biological_Process	0.0152778	Up
GO:0010324	membrane invagination	18/720	143/18866	8.77715e-06	9.8325e-05	7.16911e-05	ITGAM/AIF1/ARHGAP25/BIN2/ITGB2/FCGR2B/NCKAP1L/CD300A/TREM2/MSR1/FCER1G/FCGR1A/SH3BP1/RAC2/MARCO/IGLL5/C3/MFGE8	18	geneontology_Biological_Process	0.025	Up
GO:0001503	ossification	35/720	412/18866	9.07767e-06	0.00010145	7.39696e-05	ALOX5/CLEC3B/PTK2B/FGR/RASSF2/CSF1/TEK/CLEC5A/CEBPA/TNFRSF11A/JAG1/S1PR1/LTBP3/CCR1/EXT1/PDLIM7/DHRS3/ANKH/SEMA7A/CCL3/SRGN/SPP1/TCIRG1/CLEC11A/BGLAP/SNX10/CCN2/MDK/HGF/VCAN/BMP8B/SMOC1/ACP5/ITGA11/CTSK	35	geneontology_Biological_Process	0.0486111	Up
GO:0045446	endothelial cell differentiation	16/720	117/18866	9.5086e-06	0.000105764	7.71146e-05	SOX17/IL1B/ACVRL1/COL15A1/ENG/RAPGEF3/NOTCH4/COL18A1/ROBO4/F11R/JAG1/S1PR1/ICAM1/CDH5/GPX1/CLDN5	16	geneontology_Biological_Process	0.0222222	Up
GO:1904019	epithelial cell apoptotic process	16/720	117/18866	9.5086e-06	0.000105764	7.71146e-05	ARRB2/CFLAR/GAS6/TEK/COL18A1/HMOX1/CCL2/CD40/TGFBR2/ICAM1/CDH5/RAMP2/ECSCR/ZFP36/MDK/SFRP4	16	geneontology_Biological_Process	0.0222222	Up
GO:1903532	positive regulation of secretion by cell	29/720	313/18866	1.04722e-05	0.000116207	8.47292e-05	ITGAM/HLA-DRB1/CD14/PTAFR/HLA-E/TLR4/FGR/ITGB2/CD33/ABCG1/VAMP8/TREM2/IL1B/FCER1G/TLR2/PLA2G6/UNC13D/SNCA/CLEC5A/SCAMP5/CD34/ADAM8/CLEC4E/TNFRSF11A/CXCL12/GPR68/SPP1/SYBU/AGT	29	geneontology_Biological_Process	0.0402778	Up
GO:0051279	regulation of release of sequestered calcium ion into cytosol	13/720	81/18866	1.12015e-05	0.000124008	9.04169e-05	CORO1A/P2RY6/CX3CL1/PTK2B/PTPN6/APLNR/SNCA/CXCL10/CAPN3/CYBA/GSTM2/CXCL9/CXCL11	13	geneontology_Biological_Process	0.0180556	Up
GO:0010758	regulation of macrophage chemotaxis	8/720	30/18866	1.20098e-05	0.000132333	9.64873e-05	SLAMF8/PTK2B/CSF1R/C3AR1/CSF1/C5AR1/CCL5/MDK	8	geneontology_Biological_Process	0.0111111	Up
GO:0060142	regulation of syncytium formation by plasma membrane fusion	8/720	30/18866	1.20098e-05	0.000132333	9.64873e-05	CD53/TYROBP/CFLAR/TREM2/RAPGEF3/CXCL10/CXCL9/DCSTAMP	8	geneontology_Biological_Process	0.0111111	Up
GO:0050707	regulation of cytokine secretion	11/720	59/18866	1.21816e-05	0.000133912	9.76382e-05	CD14/FGR/FCGR2B/TLR2/TLR1/CLEC5A/SCAMP5/TLR5/CD34/CLEC4E/SRGN	11	geneontology_Biological_Process	0.0152778	Up
GO:0034767	positive regulation of ion transmembrane transport	19/720	161/18866	1.27844e-05	0.000140211	0.000102231	CCR2/P2RY6/CX3CL1/PTAFR/CTSS/APLNR/RAMP3/TREM2/SHANK3/ACSL5/SNCA/CXCL10/CCL2/CAPN3/GSTM2/CXCL9/CXCL11/HSPA2/AGT	19	geneontology_Biological_Process	0.0263889	Up
GO:0030193	regulation of blood coagulation	13/720	82/18866	1.28537e-05	0.000140643	0.000102546	PLEK/PRKCD/TLR4/FCER1G/SH2B3/PDGFB/SERPING1/CD34/F11R/APOE/THBD/F3/PLAT	13	geneontology_Biological_Process	0.0180556	Up
GO:0051258	protein polymerization	28/720	300/18866	1.29351e-05	0.000140976	0.000102789	WAS/CORO1A/FES/HCLS1/AIF1/PYCARD/PRKCD/PTK2B/HCK/NCKAP1L/TRIOBP/ARHGAP18/MICALL2/PSTPIP1/ARPC1B/CAPG/SNCA/FCHSD1/KANK3/ESAM/GMFG/ICAM1/CDH5/SLIT2/GAS7/MAP2/MX1/SCIN	28	geneontology_Biological_Process	0.0388889	Up
GO:0030336	negative regulation of cell migration	31/720	350/18866	1.29441e-05	0.000140976	0.000102789	ARHGAP4/AIF1/CD74/SLAMF8/CX3CL1/ADORA3/ARHGDIB/CD300A/PTPRJ/TMIGD3/ACVRL1/HYAL2/ENG/PTPRM/MCTP1/VASH1/HMOX1/CCL2/APOE/JAG1/CX3CR1/SLIT2/CXCL12/TIE1/NDRG4/CD200/SULF1/BST2/CYGB/CLDN5/SEMA6D	31	geneontology_Biological_Process	0.0430556	Up
GO:0002673	regulation of acute inflammatory response	10/720	49/18866	1.31268e-05	0.000142637	0.000104	BTK/HLA-E/NLRP3/FCGR2B/IL1B/FCER1G/OSM/ADAM8/TNFRSF11A/C3	10	geneontology_Biological_Process	0.0138889	Up
GO:1903428	positive regulation of reactive oxygen species biosynthetic process	11/720	60/18866	1.44078e-05	0.000156195	0.000113885	AIF1/CLEC7A/PTK2B/TLR4/ITGB2/IL1B/HBB/ICAM1/CYBA/PTX3/AGT	11	geneontology_Biological_Process	0.0152778	Up
GO:1900046	regulation of hemostasis	13/720	83/18866	1.47162e-05	0.000159172	0.000116056	PLEK/PRKCD/TLR4/FCER1G/SH2B3/PDGFB/SERPING1/CD34/F11R/APOE/THBD/F3/PLAT	13	geneontology_Biological_Process	0.0180556	Up
GO:0050853	B cell receptor signaling pathway	17/720	135/18866	1.54125e-05	0.000166097	0.000121105	BTK/NFAM1/BLNK/CD22/PTPN6/FCGR2B/MNDA/LCK/NCKAP1L/LAT2/PTPRC/CD300A/LPXN/PRKCH/CD79A/PTPN22/IGLL5	17	geneontology_Biological_Process	0.0236111	Up
GO:0051281	positive regulation of release of sequestered calcium ion into cytosol	9/720	40/18866	1.5427e-05	0.000166097	0.000121105	P2RY6/CX3CL1/APLNR/SNCA/CXCL10/CAPN3/GSTM2/CXCL9/CXCL11	9	geneontology_Biological_Process	0.0125	Up
GO:0002675	positive regulation of acute inflammatory response	8/720	31/18866	1.56489e-05	0.000167336	0.000122009	BTK/HLA-E/IL1B/FCER1G/OSM/ADAM8/TNFRSF11A/C3	8	geneontology_Biological_Process	0.0111111	Up
GO:0034368	protein-lipid complex remodeling	8/720	31/18866	1.56489e-05	0.000167336	0.000122009	ABCG1/GPIHBP1/APOE/APOC1/PLTP/PLA2G5/APOC2/AGT	8	geneontology_Biological_Process	0.0111111	Up
GO:0034369	plasma lipoprotein particle remodeling	8/720	31/18866	1.56489e-05	0.000167336	0.000122009	ABCG1/GPIHBP1/APOE/APOC1/PLTP/PLA2G5/APOC2/AGT	8	geneontology_Biological_Process	0.0111111	Up
GO:0006956	complement activation	20/720	178/18866	1.58877e-05	0.000169505	0.00012359	C1QA/VSIG4/C1QB/CFI/C1QC/FCN1/C3AR1/IL1B/C5AR1/SERPING1/C1RL/IGLL5/C3/C4B/C2/C4A/CFB/C1R/C1S/CFH	20	geneontology_Biological_Process	0.0277778	Up
GO:0061515	myeloid cell development	12/720	72/18866	1.63555e-05	0.000174101	0.000126941	LILRB1/PTPN6/NRROS/NCKAP1L/TYROBP/TLR2/SH2B3/ZNF385A/EVI2B/RHEX/GPR68/SIGLEC15	12	geneontology_Biological_Process	0.0166667	Up
GO:0002524	hypersensitivity	5/720	10/18866	1.71503e-05	0.000182149	0.000132809	BTK/HLA-E/FCGR2B/FCER1G/C3	5	geneontology_Biological_Process	0.00694444	Up
GO:0048872	homeostasis of number of cells	25/720	256/18866	1.73439e-05	0.000183791	0.000134006	RIPK3/SASH3/CORO1A/CCR2/HCLS1/CD74/IKZF1/INPP5D/NCKAP1L/JAK3/SPI1/LGALS9/FCER1G/RASSF2/CSF1/SH2B3/TNFSF13B/MERTK/HMOX1/LAT/RHEX/EPAS1/SLC40A1/TCIRG1/ZFP36	25	geneontology_Biological_Process	0.0347222	Up
GO:0019372	lipoxygenase pathway	6/720	16/18866	1.74536e-05	0.000184538	0.000134551	ALOX5/ALOX5AP/LTC4S/PON2/PON3/GPX1	6	geneontology_Biological_Process	0.00833333	Up
GO:0010517	regulation of phospholipase activity	12/720	73/18866	1.89025e-05	0.000199409	0.000145394	PLCB2/RASGRP4/P2RY6/PTAFR/GNA15/C5AR1/SNCA/CD86/PLA2G5/CCL5/APOC2/AGT	12	geneontology_Biological_Process	0.0166667	Up
GO:1903531	negative regulation of secretion by cell	19/720	166/18866	1.98043e-05	0.000208455	0.000151989	CCR2/CD22/LILRB1/FCGR2B/CD300A/LGALS9/VAMP8/TNFRSF1B/IL1B/OSM/SNCA/RHBDF1/HMOX1/APOE/CD84/MAOB/SRGN/CD200/LIF	19	geneontology_Biological_Process	0.0263889	Up
GO:0010518	positive regulation of phospholipase activity	11/720	62/18866	1.99374e-05	0.000209387	0.000152669	PLCB2/RASGRP4/P2RY6/PTAFR/GNA15/C5AR1/CD86/PLA2G5/CCL5/APOC2/AGT	11	geneontology_Biological_Process	0.0152778	Up
GO:0010743	regulation of macrophage derived foam cell differentiation	8/720	32/18866	2.01716e-05	0.000210905	0.000153776	IL18/ABCG1/MSR1/CSF1/PRKCH/PLA2G5/AGT/ITGB3	8	geneontology_Biological_Process	0.0111111	Up
GO:0034367	protein-containing complex remodeling	8/720	32/18866	2.01716e-05	0.000210905	0.000153776	ABCG1/GPIHBP1/APOE/APOC1/PLTP/PLA2G5/APOC2/AGT	8	geneontology_Biological_Process	0.0111111	Up
GO:0051051	negative regulation of transport	38/720	483/18866	2.17252e-05	0.000226645	0.000165253	CORO1A/CCR2/CD74/LILRB2/CD22/LILRB1/CD300LF/PTK2B/FCGR2B/CD33/CD300A/SIRPA/LGALS9/VAMP8/TNFRSF1B/SLC43A2/IL1B/OSM/TLR2/SNCA/MCTP1/SCAMP5/RHBDF1/HMOX1/APOE/ICAM1/GABRE/APOC1/CD84/MAOB/SRGN/CD200/BST2/GSTM2/LIF/APOC2/SFRP4/ITGB3	38	geneontology_Biological_Process	0.0527778	Up
GO:0003094	glomerular filtration	7/720	24/18866	2.24503e-05	0.000233175	0.000170014	GAS6/PDGFB/GJA5/JCHAIN/CD34/CYBA/SULF1	7	geneontology_Biological_Process	0.00972222	Up
GO:0031342	negative regulation of cell killing	7/720	24/18866	2.24503e-05	0.000233175	0.000170014	LILRB1/HLA-E/FCGR2B/ARRB2/PTPRC/LGALS9/HAVCR2	7	geneontology_Biological_Process	0.00972222	Up
GO:0050830	defense response to Gram-positive bacterium	14/720	99/18866	2.31145e-05	0.000239546	0.000174658	MPEG1/LYZ/HLA-E/NLRP3/FGR/CARD9/RNASE6/HAVCR2/TLR2/C5AR1/TNFRSF14/GSDMD/GBP4/ACP5	14	geneontology_Biological_Process	0.0194444	Up
GO:0002707	negative regulation of lymphocyte mediated immunity	9/720	42/18866	2.34958e-05	0.000242962	0.000177149	PARP3/LILRB1/HLA-E/PTPN6/FCGR2B/ARRB2/PTPRC/LGALS9/HAVCR2	9	geneontology_Biological_Process	0.0125	Up
GO:1903034	regulation of response to wounding	20/720	183/18866	2.38729e-05	0.000246321	0.000179598	ALOX5/PLEK/CLEC7A/PRKCD/TLR4/SCARF1/FCER1G/SH2B3/PDGFB/SERPING1/CD34/F11R/APOE/THBD/F3/GRN/SPP1/PLAT/MDK/SMOC2	20	geneontology_Biological_Process	0.0277778	Up
GO:0035821	modulation of process of other organism	15/720	113/18866	2.57396e-05	0.000264444	0.000192812	MPEG1/CD209/CD4/CSF1R/S100A9/HYAL2/CCL4/CCL8/APOE/GSDMD/CCL3/IFI27/CCL5/SLPI/PTX3	15	geneontology_Biological_Process	0.0208333	Up
GO:0090022	regulation of neutrophil chemotaxis	8/720	33/18866	2.57418e-05	0.000264444	0.000192812	CD74/C3AR1/NCKAP1L/MPP1/C5AR1/RAC2/SLIT2/MDK	8	geneontology_Biological_Process	0.0111111	Up
GO:0030889	negative regulation of B cell proliferation	6/720	17/18866	2.61044e-05	0.000267003	0.000194678	BTK/INPP5D/FCGR2B/MNDA/TYROBP/CD300A	6	geneontology_Biological_Process	0.00833333	Up
GO:0044764	multi-organism cellular process	6/720	17/18866	2.61044e-05	0.000267003	0.000194678	SIGLEC1/CD4/CCR5/GAS6/HYAL2/FCHSD1	6	geneontology_Biological_Process	0.00833333	Up
GO:0002455	humoral immune response mediated by circulating immunoglobulin	18/720	155/18866	2.67377e-05	0.000272887	0.000198968	HLA-DRB1/C1QA/C1QB/CFI/C1QC/PTPN6/FCGR2B/PTPRC/HLA-DQB1/SERPING1/C1RL/IGLL5/C3/C4B/C2/C4A/C1R/C1S	18	geneontology_Biological_Process	0.025	Up
GO:0014066	regulation of phosphatidylinositol 3-kinase signaling	16/720	127/18866	2.70861e-05	0.000275845	0.000201125	NCF1/HCLS1/IL18/PTPN6/PIK3R5/FGR/PIK3AP1/HCST/OSM/PDGFB/TEK/PIK3IP1/CCL5/HGF/IER3/AGT	16	geneontology_Biological_Process	0.0222222	Up
GO:0032271	regulation of protein polymerization	23/720	231/18866	2.74136e-05	0.000278577	0.000203117	WAS/CORO1A/FES/HCLS1/PYCARD/PRKCD/PTK2B/HCK/NCKAP1L/TRIOBP/ARHGAP18/ARPC1B/CAPG/SNCA/FCHSD1/KANK3/ESAM/GMFG/ICAM1/CDH5/SLIT2/MAP2/SCIN	23	geneontology_Biological_Process	0.0319444	Up
GO:0050818	regulation of coagulation	13/720	88/18866	2.80398e-05	0.000284327	0.000207309	PLEK/PRKCD/TLR4/FCER1G/SH2B3/PDGFB/SERPING1/CD34/F11R/APOE/THBD/F3/PLAT	13	geneontology_Biological_Process	0.0180556	Up
GO:0060193	positive regulation of lipase activity	12/720	76/18866	2.87294e-05	0.000290692	0.000211951	PLCB2/RASGRP4/P2RY6/PTAFR/GNA15/C5AR1/GPIHBP1/CD86/PLA2G5/CCL5/APOC2/AGT	12	geneontology_Biological_Process	0.0166667	Up
GO:0060191	regulation of lipase activity	14/720	101/18866	2.90855e-05	0.000293664	0.000214117	PLCB2/RASGRP4/P2RY6/PTAFR/GNA15/C5AR1/GPIHBP1/SNCA/CD86/APOC1/PLA2G5/CCL5/APOC2/AGT	14	geneontology_Biological_Process	0.0194444	Up
GO:0008360	regulation of cell shape	18/720	156/18866	2.91707e-05	0.000293893	0.000214284	FGD2/CORO1A/FES/LST1/PTK2B/HCK/FGR/ITGB2/CSF1R/SEMA4A/PLXND1/ARHGAP18/RAC2/CCL2/F11R/ICAM1/CCL3/EPB41L3	18	geneontology_Biological_Process	0.025	Up
GO:0097205	renal filtration	7/720	25/18866	3.01586e-05	0.000303197	0.000221068	GAS6/PDGFB/GJA5/JCHAIN/CD34/CYBA/SULF1	7	geneontology_Biological_Process	0.00972222	Up
GO:0002604	regulation of dendritic cell antigen processing and presentation	5/720	11/18866	3.04533e-05	0.00030421	0.000221807	FGL2/CD74/FCGR2B/CD68/SLC11A1	5	geneontology_Biological_Process	0.00694444	Up
GO:0044803	multi-organism membrane organization	5/720	11/18866	3.04533e-05	0.00030421	0.000221807	CD4/CCR5/GAS6/HYAL2/FCHSD1	5	geneontology_Biological_Process	0.00694444	Up
GO:0045060	negative thymic T cell selection	5/720	11/18866	3.04533e-05	0.00030421	0.000221807	DOCK2/CD74/ZAP70/CD3E/PTPRC	5	geneontology_Biological_Process	0.00694444	Up
GO:0009620	response to fungus	10/720	54/18866	3.21817e-05	0.000320794	0.000233899	BTK/CLEC7A/TLR4/IL17RA/CARD9/S100A9/S100A8/PLA2G5/GNLY/PTX3	10	geneontology_Biological_Process	0.0138889	Up
GO:0014015	positive regulation of gliogenesis	12/720	77/18866	3.28687e-05	0.00032695	0.000238387	CCR2/CX3CL1/TNFRSF1B/TREM2/IL1B/TLR2/CSF1/PRKCH/CX3CR1/CCL3/LIF/MDK	12	geneontology_Biological_Process	0.0166667	Up
GO:0043123	positive regulation of I-kappaB kinase/NF-kappaB signaling	20/720	188/18866	3.52817e-05	0.000350212	0.000255348	HLA-DRB1/CD74/CD4/TRIM22/CX3CL1/TLR4/CASP1/CARD9/LGALS9/CFLAR/IL1B/PLEKHG5/HMOX1/CD40/CX3CR1/APOL3/BST2/TGM2/SECTM1/TNFSF10	20	geneontology_Biological_Process	0.0277778	Up
GO:0032715	negative regulation of interleukin-6 production	11/720	66/18866	3.66811e-05	0.000363336	0.000264917	CX3CL1/PTPN6/TLR4/NCKAP1L/ARRB2/SIRPA/HAVCR2/GAS6/PTPN22/CD200/HGF	11	geneontology_Biological_Process	0.0152778	Up
GO:2001185	regulation of CD8-positive, alpha-beta T cell activation	6/720	18/18866	3.78954e-05	0.000374576	0.000273112	VSIR/LILRB1/HLA-E/NCKAP1L/PTPN22/IRF1	6	geneontology_Biological_Process	0.00833333	Up
GO:0045862	positive regulation of proteolysis	31/720	370/18866	3.80515e-05	0.000375329	0.000273662	PYCARD/CLEC7A/VSIR/CLEC3B/PTK2B/NLRP3/EDEM2/LCK/CASP1/CARD9/S100A9/LGALS9/TNFRSF1B/CFLAR/TREM2/IL1B/DAB2/SNCA/ADAM8/CEBPA/APOE/PCOLCE/CAPN3/ATP2A3/F3/GRN/NLRP1/S100A8/ECSCR/TNFSF10/CCN2	31	geneontology_Biological_Process	0.0430556	Up
GO:0043122	regulation of I-kappaB kinase/NF-kappaB signaling	24/720	252/18866	3.82117e-05	0.000376121	0.000274239	HLA-DRB1/CD74/PYCARD/CD4/TRIM22/CX3CL1/TLR4/CASP1/CARD9/SIRPA/LGALS9/CFLAR/IL1B/NFKBID/PLEKHG5/HMOX1/CD40/CX3CR1/APOL3/CAPN3/BST2/TGM2/SECTM1/TNFSF10	24	geneontology_Biological_Process	0.0333333	Up
GO:0030833	regulation of actin filament polymerization	19/720	174/18866	3.83451e-05	0.000376647	0.000274622	WAS/CORO1A/HCLS1/PYCARD/PRKCD/PTK2B/HCK/NCKAP1L/TRIOBP/ARHGAP18/ARPC1B/CAPG/FCHSD1/KANK3/ESAM/GMFG/ICAM1/SLIT2/SCIN	19	geneontology_Biological_Process	0.0263889	Up
GO:0002431	Fc receptor mediated stimulatory signaling pathway	17/720	145/18866	3.92936e-05	0.000385159	0.000280829	WAS/MYO1G/VAV1/PRKCD/FCGR2A/HCK/FGR/FCGR2B/NCKAP1L/PTPRC/PTPRJ/FCER1G/PLA2G6/CD247/FCGR1A/ARPC1B/FCGR3A	17	geneontology_Biological_Process	0.0236111	Up
GO:0032743	positive regulation of interleukin-2 production	7/720	26/18866	3.99173e-05	0.00039046	0.000284693	SASH3/CCR2/CLEC7A/CD4/PTPRC/IL1B/CD86	7	geneontology_Biological_Process	0.00972222	Up
GO:0006691	leukotriene metabolic process	8/720	35/18866	4.07869e-05	0.000397806	0.00029005	ALOX5/ALOX5AP/LTC4S/DPEP2/TLR2/GGT7/GGT5/PLA2G5	8	geneontology_Biological_Process	0.0111111	Up
GO:0002064	epithelial cell development	22/720	221/18866	4.08375e-05	0.000397806	0.00029005	MYO7A/TRIOBP/IL1B/SPINT2/COL15A1/ENG/PDGFB/RAPGEF3/NOTCH4/PSAP/COL18A1/ROBO4/ST14/F11R/JAG1/CST3/ICAM1/CDH5/PODXL/GPX1/ACTA2/CLDN5	22	geneontology_Biological_Process	0.0305556	Up
GO:0051048	negative regulation of secretion	20/720	190/18866	4.10659e-05	0.000399205	0.00029107	CCR2/CD74/CD22/LILRB1/FCGR2B/CD300A/LGALS9/VAMP8/TNFRSF1B/IL1B/OSM/SNCA/RHBDF1/HMOX1/APOE/CD84/MAOB/SRGN/CD200/LIF	20	geneontology_Biological_Process	0.0277778	Up
GO:0001974	blood vessel remodeling	9/720	45/18866	4.21526e-05	0.000408924	0.000298156	CCR2/ACVRL1/JAG1/CST3/HOXA3/EPAS1/TGM2/LIF/AGT	9	geneontology_Biological_Process	0.0125	Up
GO:0050918	positive chemotaxis	11/720	67/18866	4.23933e-05	0.000410413	0.000299242	CORO1A/CX3CL1/PTPRJ/PDGFB/CXCL10/S1PR1/CXCL12/F3/CCL3/CCL5/HGF	11	geneontology_Biological_Process	0.0152778	Up
GO:0002712	regulation of B cell mediated immunity	10/720	56/18866	4.47017e-05	0.000430986	0.000314242	BTK/TNFSF13/PARP3/HLA-E/PTPN6/FCGR2B/PTPRC/FCER1G/CD40/C3	10	geneontology_Biological_Process	0.0138889	Up
GO:0002889	regulation of immunoglobulin mediated immune response	10/720	56/18866	4.47017e-05	0.000430986	0.000314242	BTK/TNFSF13/PARP3/HLA-E/PTPN6/FCGR2B/PTPRC/FCER1G/CD40/C3	10	geneontology_Biological_Process	0.0138889	Up
GO:1904064	positive regulation of cation transmembrane transport	17/720	147/18866	4.68492e-05	0.000450768	0.000328665	CCR2/P2RY6/CX3CL1/CTSS/APLNR/RAMP3/TREM2/SHANK3/SNCA/CXCL10/CCL2/CAPN3/GSTM2/CXCL9/CXCL11/HSPA2/AGT	17	geneontology_Biological_Process	0.0236111	Up
GO:1903305	regulation of regulated secretory pathway	18/720	162/18866	4.83631e-05	0.000464385	0.000338594	ITGAM/CCR2/FES/PTAFR/STXBP2/FGR/ITGB2/FCGR2B/CD300A/LGALS9/VAMP8/FCER1G/ADGRE2/UNC13D/SCAMP5/RAC2/HMOX1/CD84	18	geneontology_Biological_Process	0.025	Up
GO:0002708	positive regulation of lymphocyte mediated immunity	14/720	106/18866	5.02887e-05	0.000478693	0.000349026	SASH3/BTK/TNFSF13/VAV1/IL18/HLA-E/NLRP3/PTPRC/IL1B/CD1D/FCER1G/LAG3/CD40/C3	14	geneontology_Biological_Process	0.0194444	Up
GO:0046632	alpha-beta T cell differentiation	14/720	106/18866	5.02887e-05	0.000478693	0.000349026	SASH3/IL18/NLRP3/ZAP70/SEMA4A/NCKAP1L/JAK3/LGALS9/NFKBID/PSAP/IRF1/CD86/TGFBR2/BATF	14	geneontology_Biological_Process	0.0194444	Up
GO:0032494	response to peptidoglycan	5/720	12/18866	5.05654e-05	0.000478693	0.000349026	IRF5/NLRP3/CARD9/TREM2/C5AR1	5	geneontology_Biological_Process	0.00694444	Up
GO:0036005	response to macrophage colony-stimulating factor	5/720	12/18866	5.05654e-05	0.000478693	0.000349026	TLR4/CSF1R/TLR2/CSF1/DCSTAMP	5	geneontology_Biological_Process	0.00694444	Up
GO:0036006	cellular response to macrophage colony-stimulating factor stimulus	5/720	12/18866	5.05654e-05	0.000478693	0.000349026	TLR4/CSF1R/TLR2/CSF1/DCSTAMP	5	geneontology_Biological_Process	0.00694444	Up
GO:0038110	interleukin-2-mediated signaling pathway	5/720	12/18866	5.05654e-05	0.000478693	0.000349026	PTK2B/STAT5A/JAK3/IL2RG/IL2RB	5	geneontology_Biological_Process	0.00694444	Up
GO:0043383	negative T cell selection	5/720	12/18866	5.05654e-05	0.000478693	0.000349026	DOCK2/CD74/ZAP70/CD3E/PTPRC	5	geneontology_Biological_Process	0.00694444	Up
GO:2000516	positive regulation of CD4-positive, alpha-beta T cell activation	8/720	36/18866	5.07003e-05	0.000479006	0.000349255	SASH3/IL18/NLRP3/NCKAP1L/LGALS9/NFKBID/CD86/TGFBR2	8	geneontology_Biological_Process	0.0111111	Up
GO:0002532	production of molecular mediator involved in inflammatory response	13/720	93/18866	5.0895e-05	0.000479881	0.000349893	ALOX5/BTK/PYCARD/GPSM3/CLEC7A/SLAMF8/TLR4/IL17RA/SIRPA/VAMP8/FCER1G/PLD4/GRN	13	geneontology_Biological_Process	0.0180556	Up
GO:0036037	CD8-positive, alpha-beta T cell activation	7/720	27/18866	5.21236e-05	0.000489504	0.000356909	VSIR/LILRB1/HLA-E/NCKAP1L/PTPN22/IRF1/CLEC4A	7	geneontology_Biological_Process	0.00972222	Up
GO:1901623	regulation of lymphocyte chemotaxis	7/720	27/18866	5.21236e-05	0.000489504	0.000356909	CCR2/PTK2B/CCL4/CXCL10/CCL2/CCL3/CCL5	7	geneontology_Biological_Process	0.00972222	Up
GO:0060760	positive regulation of response to cytokine stimulus	10/720	57/18866	5.23812e-05	0.000490943	0.000357958	CD74/CD300LF/TLR4/CASP1/TREM2/GAS6/TLR2/CSF1/NLRC5/IRF7	10	geneontology_Biological_Process	0.0138889	Up
GO:0043280	positive regulation of cysteine-type endopeptidase activity involved in apoptotic process	16/720	134/18866	5.26588e-05	0.000492563	0.00035914	PYCARD/CLEC7A/NLRP3/LCK/CASP1/CARD9/S100A9/LGALS9/CFLAR/SNCA/ATP2A3/F3/NLRP1/S100A8/TNFSF10/CCN2	16	geneontology_Biological_Process	0.0222222	Up
GO:0010744	positive regulation of macrophage derived foam cell differentiation	6/720	19/18866	5.3603e-05	0.000495485	0.00036127	IL18/MSR1/CSF1/PRKCH/PLA2G5/AGT	6	geneontology_Biological_Process	0.00833333	Up
GO:0010759	positive regulation of macrophage chemotaxis	6/720	19/18866	5.3603e-05	0.000495485	0.00036127	CSF1R/C3AR1/CSF1/C5AR1/CCL5/MDK	6	geneontology_Biological_Process	0.00833333	Up
GO:0048245	eosinophil chemotaxis	6/720	19/18866	5.3603e-05	0.000495485	0.00036127	CX3CL1/CCL4/CCL8/CCL2/CCL3/CCL5	6	geneontology_Biological_Process	0.00833333	Up
GO:0090026	positive regulation of monocyte chemotaxis	6/720	19/18866	5.3603e-05	0.000495485	0.00036127	CCR2/AIF1/CXCL10/CXCL12/CCR1/CCL5	6	geneontology_Biological_Process	0.00833333	Up
GO:0150079	negative regulation of neuroinflammatory response	6/720	19/18866	5.3603e-05	0.000495485	0.00036127	CX3CL1/PTPRC/TNFRSF1B/GRN/CD200/CST7	6	geneontology_Biological_Process	0.00833333	Up
GO:1903975	regulation of glial cell migration	6/720	19/18866	5.3603e-05	0.000495485	0.00036127	CCR2/CX3CL1/TREM2/CSF1/CX3CR1/CCL3	6	geneontology_Biological_Process	0.00833333	Up
GO:0007259	receptor signaling pathway via JAK-STAT	18/720	164/18866	5.68864e-05	0.000524804	0.000382647	IL10RA/CCR2/HCLS1/IL18/PTK2B/CSF1R/STAT5A/JAK3/PTPRC/CD300A/OSM/SH2B3/CCL2/CD40/SOCS3/LIF/CCL5/AGT	18	geneontology_Biological_Process	0.025	Up
GO:0046638	positive regulation of alpha-beta T cell differentiation	9/720	47/18866	6.05467e-05	0.00055748	0.000406472	SASH3/IL18/NLRP3/ZAP70/NCKAP1L/LGALS9/NFKBID/CD86/TGFBR2	9	geneontology_Biological_Process	0.0125	Up
GO:0097242	amyloid-beta clearance	8/720	37/18866	6.25413e-05	0.000574721	0.000419043	ITGAM/ITGB2/TREM2/MSR1/C5AR1/APOE/MARCO/C3	8	geneontology_Biological_Process	0.0111111	Up
GO:0006690	icosanoid metabolic process	15/720	122/18866	6.37732e-05	0.000583101	0.000425153	ALOX5/CD74/PTGS1/HPGDS/ALOX5AP/LTC4S/DPEP2/IL1B/TLR2/PON2/GGT7/PON3/GGT5/GPX1/PLA2G5	15	geneontology_Biological_Process	0.0208333	Up
GO:0010811	positive regulation of cell-substrate adhesion	15/720	122/18866	6.37732e-05	0.000583101	0.000425153	CX3CL1/PTK2B/CD3E/TRIOBP/PTPRJ/CSF1/UNC13D/TEK/NEDD9/CCDC80/MDK/EGFL6/SMOC2/EGFLAM/COL16A1	15	geneontology_Biological_Process	0.0208333	Up
GO:0048017	inositol lipid-mediated signaling	20/720	196/18866	6.38251e-05	0.000583101	0.000425153	PLCB2/NCF1/HCLS1/ADAP2/IL18/PTAFR/PTPN6/PIK3R5/FGR/CSF1R/PIK3AP1/HCST/OSM/PDGFB/TEK/PIK3IP1/CCL5/HGF/IER3/AGT	20	geneontology_Biological_Process	0.0277778	Up
GO:0002335	mature B cell differentiation	7/720	28/18866	6.72234e-05	0.000612957	0.000446921	MFNG/SLAMF8/PTK2B/FCGR2B/POU2F2/ITM2A/LFNG	7	geneontology_Biological_Process	0.00972222	Up
GO:0046456	icosanoid biosynthetic process	10/720	59/18866	7.11512e-05	0.000647517	0.00047212	ALOX5/CD74/PTGS1/HPGDS/ALOX5AP/LTC4S/IL1B/GGT7/GGT5/PLA2G5	10	geneontology_Biological_Process	0.0138889	Up
GO:0002820	negative regulation of adaptive immune response	9/720	48/18866	7.20234e-05	0.000652929	0.000476066	PARP3/LILRB1/PTPN6/FCGR2B/SAMSN1/JAK3/PTPRC/HAVCR2/TNFRSF14	9	geneontology_Biological_Process	0.0125	Up
GO:0032648	regulation of interferon-beta production	9/720	48/18866	7.20234e-05	0.000652929	0.000476066	IRF5/PYCARD/LILRB1/TLR4/DHX58/SIRPA/TLR2/IRF1/IRF7	9	geneontology_Biological_Process	0.0125	Up
GO:0002292	T cell differentiation involved in immune response	11/720	71/18866	7.35569e-05	0.000665548	0.000485267	FGL2/IL18/NLRP3/SEMA4A/JAK3/LGALS9/FCER1G/NFKBID/CLEC4E/CD86/BATF	11	geneontology_Biological_Process	0.0152778	Up
GO:0032495	response to muramyl dipeptide	6/720	20/18866	7.41128e-05	0.000669291	0.000487996	IRF5/CARD9/PTPN22/JAG1/NLRP1/LDOC1	6	geneontology_Biological_Process	0.00833333	Up
GO:0071347	cellular response to interleukin-1	19/720	183/18866	7.64652e-05	0.00068642	0.000500485	PYCARD/CX3CL1/SIRPA/IL1B/HYAL2/CCL4/MAPK13/CCL8/CCL2/CD40/ICAM1/PSMB9/CCL14/CCL3/HYAL1/CCL5/CCL18/EGR1/GBP1	19	geneontology_Biological_Process	0.0263889	Up
GO:0010742	macrophage derived foam cell differentiation	8/720	38/18866	7.6593e-05	0.00068642	0.000500485	IL18/ABCG1/MSR1/CSF1/PRKCH/PLA2G5/AGT/ITGB3	8	geneontology_Biological_Process	0.0111111	Up
GO:0046596	regulation of viral entry into host cell	8/720	38/18866	7.6593e-05	0.00068642	0.000500485	HLA-DRB1/CD74/CD4/TRIM22/FCN1/LGALS9/IFITM2/PTX3	8	geneontology_Biological_Process	0.0111111	Up
GO:0090077	foam cell differentiation	8/720	38/18866	7.6593e-05	0.00068642	0.000500485	IL18/ABCG1/MSR1/CSF1/PRKCH/PLA2G5/AGT/ITGB3	8	geneontology_Biological_Process	0.0111111	Up
GO:0001935	endothelial cell proliferation	20/720	199/18866	7.89496e-05	0.000706194	0.000514903	ALOX5/EGFL7/TNFSF12/STAT5A/APLNR/ACVRL1/PDGFB/PTPRM/TEK/VASH1/CD34/HMOX1/CCL2/APOE/CXCL12/CYBA/F3/SULF1/MDK/ITGB3	20	geneontology_Biological_Process	0.0277778	Up
GO:0035710	CD4-positive, alpha-beta T cell activation	13/720	97/18866	7.9475e-05	0.000709221	0.00051711	SASH3/VSIR/IL18/NLRP3/SEMA4A/NCKAP1L/JAK3/LGALS9/NFKBID/CD86/TGFBR2/BATF/TCIRG1	13	geneontology_Biological_Process	0.0180556	Up
GO:0071352	cellular response to interleukin-2	5/720	13/18866	7.95895e-05	0.000709221	0.00051711	PTK2B/STAT5A/JAK3/IL2RG/IL2RB	5	geneontology_Biological_Process	0.00694444	Up
GO:0002433	immune response-regulating cell surface receptor signaling pathway involved in phagocytosis	16/720	139/18866	8.21373e-05	0.000729162	0.000531649	WAS/MYO1G/VAV1/PRKCD/FCGR2A/HCK/FGR/FCGR2B/NCKAP1L/PTPRC/PTPRJ/PLA2G6/CD247/FCGR1A/ARPC1B/FCGR3A	16	geneontology_Biological_Process	0.0222222	Up
GO:0038096	Fc-gamma receptor signaling pathway involved in phagocytosis	16/720	139/18866	8.21373e-05	0.000729162	0.000531649	WAS/MYO1G/VAV1/PRKCD/FCGR2A/HCK/FGR/FCGR2B/NCKAP1L/PTPRC/PTPRJ/PLA2G6/CD247/FCGR1A/ARPC1B/FCGR3A	16	geneontology_Biological_Process	0.0222222	Up
GO:0001936	regulation of endothelial cell proliferation	19/720	184/18866	8.2294e-05	0.000729178	0.000531661	ALOX5/EGFL7/TNFSF12/STAT5A/APLNR/ACVRL1/PDGFB/PTPRM/TEK/VASH1/HMOX1/CCL2/APOE/CXCL12/CYBA/F3/SULF1/MDK/ITGB3	19	geneontology_Biological_Process	0.0263889	Up
GO:1904427	positive regulation of calcium ion transmembrane transport	11/720	72/18866	8.38719e-05	0.000741762	0.000540836	P2RY6/CX3CL1/APLNR/RAMP3/SNCA/CXCL10/CAPN3/GSTM2/CXCL9/CXCL11/HSPA2	11	geneontology_Biological_Process	0.0152778	Up
GO:0032479	regulation of type I interferon production	15/720	125/18866	8.44879e-05	0.000745808	0.000543786	IRF5/PYCARD/UBA7/LILRB1/CD14/TLR4/DHX58/SIRPA/HAVCR2/TLR2/PTPN22/IRF1/UBE2L6/NLRC5/IRF7	15	geneontology_Biological_Process	0.0208333	Up
GO:0045058	T cell selection	9/720	49/18866	8.52752e-05	0.000749598	0.000546549	DOCK2/CD74/CD4/ZAP70/CD3E/PTPRC/CD3D/CD1D/BATF	9	geneontology_Biological_Process	0.0125	Up
GO:0070231	T cell apoptotic process	9/720	49/18866	8.52752e-05	0.000749598	0.000546549	RIPK3/DOCK8/GIMAP8/JAK3/LGALS9/NFKBID/CD27/ADAM8/CCL5	9	geneontology_Biological_Process	0.0125	Up
GO:0045577	regulation of B cell differentiation	7/720	29/18866	8.57139e-05	0.000749598	0.000546549	BTK/NFAM1/SLAMF8/INPP5D/PTPN6/NCKAP1L/CD27	7	geneontology_Biological_Process	0.00972222	Up
GO:0050855	regulation of B cell receptor signaling pathway	7/720	29/18866	8.57139e-05	0.000749598	0.000546549	NFAM1/CD22/FCGR2B/CD300A/LPXN/PRKCH/PTPN22	7	geneontology_Biological_Process	0.00972222	Up
GO:0050901	leukocyte tethering or rolling	7/720	29/18866	8.57139e-05	0.000749598	0.000546549	CCR2/PTAFR/SELL/SELPLG/CX3CR1/CXCL12/VCAM1	7	geneontology_Biological_Process	0.00972222	Up
GO:0050792	regulation of viral process	21/720	217/18866	9.11783e-05	0.000795907	0.000580315	HLA-DRB1/CD74/CD4/TRIM22/FCN1/CSF1R/PARP10/LGALS9/CCL4/CCL8/APOE/OAS1/IFITM2/CCL3/BST2/ZFP36/IFI27/CCL5/SLPI/MX1/PTX3	21	geneontology_Biological_Process	0.0291667	Up
GO:0009636	response to toxic substance	23/720	250/18866	9.35313e-05	0.000814935	0.000594188	PTGS1/ALOX5AP/LTC4S/S100A9/TLR2/CCL4/PON2/HBA2/HBB/HBA1/APOE/PON3/CST3/SCN1B/GPX1/MAOB/CCL3/CYGB/GSTM2/HBG2/CCL5/FOS/GPX3	23	geneontology_Biological_Process	0.0319444	Up
GO:0002381	immunoglobulin production involved in immunoglobulin mediated immune response	10/720	61/18866	9.53473e-05	0.000828138	0.000603815	BTK/HLA-DRB1/FGL2/TNFSF13/PARP3/PTPRC/HLA-DQB1/CD40/POU2F2/BATF	10	geneontology_Biological_Process	0.0138889	Up
GO:0070227	lymphocyte apoptotic process	11/720	73/18866	9.53987e-05	0.000828138	0.000603815	RIPK3/BTK/DOCK8/CD74/GIMAP8/JAK3/LGALS9/NFKBID/CD27/ADAM8/CCL5	11	geneontology_Biological_Process	0.0152778	Up
GO:1902904	negative regulation of supramolecular fiber organization	17/720	156/18866	9.91158e-05	0.000858821	0.000626187	WAS/CORO1A/PRKCD/TRIOBP/SHANK3/CAPG/SNCA/KANK3/F11R/APOE/GMFG/S1PR1/CDH5/SLIT2/MAP2/SHANK1/SCIN	17	geneontology_Biological_Process	0.0236111	Up
GO:0019370	leukotriene biosynthetic process	6/720	21/18866	0.000100423	0.000862991	0.000629227	ALOX5/ALOX5AP/LTC4S/GGT7/GGT5/PLA2G5	6	geneontology_Biological_Process	0.00833333	Up
GO:0033630	positive regulation of cell adhesion mediated by integrin	6/720	21/18866	0.000100423	0.000862991	0.000629227	PTPN6/CD3E/NCKAP1L/PODXL/LIF/CCL5	6	geneontology_Biological_Process	0.00833333	Up
GO:0090280	positive regulation of calcium ion import	6/720	21/18866	0.000100423	0.000862991	0.000629227	RAMP3/PDGFB/TRPV2/CCL2/CXCL12/CCL3	6	geneontology_Biological_Process	0.00833333	Up
GO:1903978	regulation of microglial cell activation	6/720	21/18866	0.000100423	0.000862991	0.000629227	CX3CL1/PTPRC/TREM2/GRN/CCL3/CST7	6	geneontology_Biological_Process	0.00833333	Up
GO:0032608	interferon-beta production	9/720	50/18866	0.000100514	0.000862991	0.000629227	IRF5/PYCARD/LILRB1/TLR4/DHX58/SIRPA/TLR2/IRF1/IRF7	9	geneontology_Biological_Process	0.0125	Up
GO:0032606	type I interferon production	15/720	127/18866	0.000101364	0.000868701	0.000633391	IRF5/PYCARD/UBA7/LILRB1/CD14/TLR4/DHX58/SIRPA/HAVCR2/TLR2/PTPN22/IRF1/UBE2L6/NLRC5/IRF7	15	geneontology_Biological_Process	0.0208333	Up
GO:0008217	regulation of blood pressure	19/720	187/18866	0.000102208	0.000874342	0.000637503	PTGS1/PTAFR/GAS6/ACVRL1/SGK1/CPA3/RENBP/PDGFB/GJA5/CD34/HBB/HMOX1/F11R/ANPEP/RAMP2/CYBA/CTSZ/ACTA2/AGT	19	geneontology_Biological_Process	0.0263889	Up
GO:0043372	positive regulation of CD4-positive, alpha-beta T cell differentiation	7/720	30/18866	0.000108145	0.000921784	0.000672094	SASH3/IL18/NLRP3/NCKAP1L/LGALS9/NFKBID/CD86	7	geneontology_Biological_Process	0.00972222	Up
GO:0061082	myeloid leukocyte cytokine production	7/720	30/18866	0.000108145	0.000921784	0.000672094	CD74/LILRB1/TLR4/FCER1G/GAS6/HMOX1/SEMA7A	7	geneontology_Biological_Process	0.00972222	Up
GO:0050848	regulation of calcium-mediated signaling	13/720	100/18866	0.000109189	0.000928996	0.000677353	PLEK/CD22/CD4/P2RY6/PTK2B/TBC1D10C/ZAP70/CD3E/TREM2/CCL4/CCL3/GSTM2/GBP1	13	geneontology_Biological_Process	0.0180556	Up
GO:0002260	lymphocyte homeostasis	10/720	62/18866	0.000109849	0.000932925	0.000680217	RIPK3/CORO1A/CD74/NCKAP1L/JAK3/LGALS9/TNFSF13B/LAT/SLC40A1/TCIRG1	10	geneontology_Biological_Process	0.0138889	Up
GO:0034142	toll-like receptor 4 signaling pathway	8/720	40/18866	0.000112601	0.000954574	0.000696002	ITGAM/CD14/TLR4/ITGB2/PIK3AP1/LILRA2/PTPN22/LY96	8	geneontology_Biological_Process	0.0111111	Up
GO:0070486	leukocyte aggregation	5/720	14/18866	0.000119923	0.001013	0.000738599	ZAP70/S100A9/IL1B/RAC2/S100A8	5	geneontology_Biological_Process	0.00694444	Up
GO:0070669	response to interleukin-2	5/720	14/18866	0.000119923	0.001013	0.000738599	PTK2B/STAT5A/JAK3/IL2RG/IL2RB	5	geneontology_Biological_Process	0.00694444	Up
GO:0002479	antigen processing and presentation of exogenous peptide antigen via MHC class I, TAP-dependent	11/720	75/18866	0.000122551	0.00103257	0.000752873	NCF4/NCF1/CYBB/HLA-E/FCGR1B/VAMP8/NCF2/FCGR1A/PSMB9/CYBA/HLA-C	11	geneontology_Biological_Process	0.0152778	Up
GO:0097696	receptor signaling pathway via STAT	18/720	174/18866	0.00012268	0.00103257	0.000752873	IL10RA/CCR2/HCLS1/IL18/PTK2B/CSF1R/STAT5A/JAK3/PTPRC/CD300A/OSM/SH2B3/CCL2/CD40/SOCS3/LIF/CCL5/AGT	18	geneontology_Biological_Process	0.025	Up
GO:2000514	regulation of CD4-positive, alpha-beta T cell activation	10/720	63/18866	0.000126173	0.00106008	0.000772929	SASH3/VSIR/IL18/NLRP3/NCKAP1L/JAK3/LGALS9/NFKBID/CD86/TGFBR2	10	geneontology_Biological_Process	0.0138889	Up
GO:0045061	thymic T cell selection	6/720	22/18866	0.000133647	0.00112087	0.000817255	DOCK2/CD74/ZAP70/CD3E/PTPRC/CD3D	6	geneontology_Biological_Process	0.00833333	Up
GO:1902624	positive regulation of neutrophil migration	7/720	31/18866	0.000135124	0.00113124	0.000824814	CD74/C3AR1/NCKAP1L/C5AR1/RAC2/ADAM8/MDK	7	geneontology_Biological_Process	0.00972222	Up
GO:0042130	negative regulation of T cell proliferation	10/720	64/18866	0.000144499	0.00120544	0.000878911	HLA-DRB1/VSIG4/LILRB2/VSIR/LILRB1/PTPN6/LGALS9/HAVCR2/TNFRSF14/CD86	10	geneontology_Biological_Process	0.0138889	Up
GO:0046637	regulation of alpha-beta T cell differentiation	10/720	64/18866	0.000144499	0.00120544	0.000878911	SASH3/IL18/NLRP3/ZAP70/NCKAP1L/JAK3/LGALS9/NFKBID/CD86/TGFBR2	10	geneontology_Biological_Process	0.0138889	Up
GO:0048015	phosphatidylinositol-mediated signaling	19/720	192/18866	0.000144943	0.001207	0.000880053	PLCB2/NCF1/HCLS1/IL18/PTAFR/PTPN6/PIK3R5/FGR/CSF1R/PIK3AP1/HCST/OSM/PDGFB/TEK/PIK3IP1/CCL5/HGF/IER3/AGT	19	geneontology_Biological_Process	0.0263889	Up
GO:0048661	positive regulation of smooth muscle cell proliferation	13/720	103/18866	0.00014804	0.00122844	0.000895688	AIF1/P2RY6/IL18/CX3CL1/PTAFR/PDGFB/HMOX1/S1PR1/TGFBR2/CYBA/TGM2/CCL5/AGT	13	geneontology_Biological_Process	0.0180556	Up
GO:0098869	cellular oxidant detoxification	13/720	103/18866	0.00014804	0.00122844	0.000895688	PTGS1/ALOX5AP/LTC4S/S100A9/HBA2/HBB/HBA1/APOE/GPX1/CYGB/GSTM2/HBG2/GPX3	13	geneontology_Biological_Process	0.0180556	Up
GO:0010951	negative regulation of endopeptidase activity	23/720	258/18866	0.000149953	0.00124213	0.000905664	ARRB2/SERPINA1/CFLAR/GAS6/NAIP/SPINT2/RENBP/CSTA/SERPING1/SNCA/CD27/CST3/ITIH4/C3/C4B/GPX1/C4A/BST2/CST7/IFI6/SLPI/HGF/AGT	23	geneontology_Biological_Process	0.0319444	Up
GO:0046427	positive regulation of receptor signaling pathway via JAK-STAT	12/720	90/18866	0.000155915	0.00128925	0.000940021	IL10RA/HCLS1/IL18/PTK2B/CSF1R/CD300A/OSM/CD40/SOCS3/LIF/CCL5/AGT	12	geneontology_Biological_Process	0.0166667	Up
GO:0048525	negative regulation of viral process	13/720	104/18866	0.000163392	0.0013487	0.000983368	FCN1/PARP10/CCL4/CCL8/OAS1/IFITM2/CCL3/BST2/ZFP36/CCL5/SLPI/MX1/PTX3	13	geneontology_Biological_Process	0.0180556	Up
GO:0002377	immunoglobulin production	20/720	210/18866	0.00016518	0.00135869	0.000990655	SASH3/BTK/HLA-DRB1/FGL2/TNFSF13/PARP3/CD22/HLA-E/FCGR2B/PTPRC/HLA-DQB1/TNFSF13B/SAMHD1/CD40/CD86/POU2F2/BATF/ITM2A/TCIRG1/MZB1	20	geneontology_Biological_Process	0.0277778	Up
GO:0034764	positive regulation of transmembrane transport	20/720	210/18866	0.00016518	0.00135869	0.000990655	CCR2/P2RY6/CX3CL1/PTAFR/CTSS/APLNR/RAMP3/TREM2/SHANK3/ACSL5/SNCA/CXCL10/CCL2/C3/CAPN3/GSTM2/CXCL9/CXCL11/HSPA2/AGT	20	geneontology_Biological_Process	0.0277778	Up
GO:0042744	hydrogen peroxide catabolic process	7/720	32/18866	0.00016731	0.00137142	0.000999934	SNCA/HBA2/HBB/HBA1/GPX1/HBG2/GPX3	7	geneontology_Biological_Process	0.00972222	Up
GO:0045589	regulation of regulatory T cell differentiation	7/720	32/18866	0.00016731	0.00137142	0.000999934	LILRB2/VSIR/LILRB4/LGALS9/LAG3/IRF1/MDK	7	geneontology_Biological_Process	0.00972222	Up
GO:0098742	cell-cell adhesion via plasma-membrane adhesion molecules	24/720	277/18866	0.000167962	0.00137436	0.00100208	CD209/JAML/ITGAM/CX3CL1/ITGB2/SELL/ITGAL/PCDH1/IGSF21/ARVCF/PTPRM/CLSTN3/ESAM/ROBO4/AMIGO2/TGFBR2/ICAM1/CDH5/MILR1/EMB/PCDHGB7/CD84/VCAM1/CLDN5	24	geneontology_Biological_Process	0.0333333	Up
GO:0031214	biomineral tissue development	17/720	163/18866	0.000169923	0.0013856	0.00101027	ALOX5/CLEC3B/PTK2B/FGR/FAM20A/GAS6/S1PR1/LTBP3/CCR1/ANKH/CCL3/SRGN/SPP1/TCIRG1/BGLAP/SNX10/KLK4	17	geneontology_Biological_Process	0.0236111	Up
GO:0110148	biomineralization	17/720	163/18866	0.000169923	0.0013856	0.00101027	ALOX5/CLEC3B/PTK2B/FGR/FAM20A/GAS6/S1PR1/LTBP3/CCR1/ANKH/CCL3/SRGN/SPP1/TCIRG1/BGLAP/SNX10/KLK4	17	geneontology_Biological_Process	0.0236111	Up
GO:0070588	calcium ion transmembrane transport	26/720	312/18866	0.000171343	0.00139475	0.00101695	TRPM2/CORO1A/P2RY6/CX3CL1/PTK2B/PTPN6/LCK/APLNR/RAMP3/PTPRC/CCR5/GAS6/PLA2G6/TMEM37/SNCA/TRPV2/CXCL10/CACNA2D4/CAPN3/ATP2A3/CYBA/CCL3/GSTM2/CXCL9/CXCL11/HSPA2	26	geneontology_Biological_Process	0.0361111	Up
GO:0001558	regulation of cell growth	32/720	420/18866	0.000172232	0.00139957	0.00102046	ARHGAP4/TMC8/PTK2B/SEMA4A/SOX17/S100A9/PTPRJ/ACVRL1/HYAL2/CXCL16/SEMA3G/SGK1/CLSTN3/TRPV2/APOE/SLIT2/IGFBP7/CXCL12/CYBA/SHTN1/SEMA7A/S100A8/SPP1/EPB41L3/BST2/HYAL1/SEMA4B/MAP2/SEMA6D/DCSTAMP/RASGRP2/AGT	32	geneontology_Biological_Process	0.0444444	Up
GO:0002864	regulation of acute inflammatory response to antigenic stimulus	5/720	15/18866	0.000174249	0.00140866	0.00102709	BTK/HLA-E/FCGR2B/FCER1G/C3	5	geneontology_Biological_Process	0.00694444	Up
GO:0015671	oxygen transport	5/720	15/18866	0.000174249	0.00140866	0.00102709	HBA2/HBB/HBA1/CYGB/HBG2	5	geneontology_Biological_Process	0.00694444	Up
GO:0090594	inflammatory response to wounding	5/720	15/18866	0.000174249	0.00140866	0.00102709	ALOX5/CCR2/HMOX1/GRN/MDK	5	geneontology_Biological_Process	0.00694444	Up
GO:0032703	negative regulation of interleukin-2 production	6/720	23/18866	0.000175014	0.00141	0.00102807	VSIG4/PTPRC/HAVCR2/CD34/ZFP36/GBP1	6	geneontology_Biological_Process	0.00833333	Up
GO:1904996	positive regulation of leukocyte adhesion to vascular endothelial cell	6/720	23/18866	0.000175014	0.00141	0.00102807	ALOX5/CCR2/PTAFR/ITGB2/ICAM1/MDK	6	geneontology_Biological_Process	0.00833333	Up
GO:0050679	positive regulation of epithelial cell proliferation	20/720	211/18866	0.000176104	0.00141636	0.0010327	JAML/EGFL7/TLR4/TNFSF12/STAT5A/APLNR/CFLAR/ACVRL1/C5AR1/PDGFB/TEK/HMOX1/CXCL12/CYBA/F3/GRN/HYAL1/CCL5/MDK/ITGB3	20	geneontology_Biological_Process	0.0277778	Up
GO:1901136	carbohydrate derivative catabolic process	19/720	195/18866	0.000177525	0.00142535	0.00103926	PRKCD/ADA2/EDEM2/FUCA1/HYAL2/IDUA/NPL/AOAH/RENBP/TYMP/SAMHD1/PSAP/NEIL1/DPYD/GALT/CST3/LYVE1/HYAL1/VCAN	19	geneontology_Biological_Process	0.0263889	Up
GO:1901222	regulation of NIK/NF-kappaB signaling	14/720	119/18866	0.000178377	0.00142975	0.00104246	IL18/CD14/NLRP3/TLR4/LGALS9/TREM2/IL1B/HAVCR2/TLR2/RASSF2/CD27/PTPN22/CD86/TCIM	14	geneontology_Biological_Process	0.0194444	Up
GO:1901215	negative regulation of neuron death	20/720	212/18866	0.000187659	0.00150159	0.00109485	CORO1A/CX3CL1/PTK2B/ARRB2/SULT1A4/TNFRSF1B/NAIP/CSF1/C5AR1/SNCA/CD34/ADAM8/HMOX1/CCL2/APOE/CX3CR1/NRBP2/GRN/CD200/MDK	20	geneontology_Biological_Process	0.0277778	Up
GO:0060759	regulation of response to cytokine stimulus	19/720	196/18866	0.00018973	0.00151559	0.00110505	CD74/PYCARD/CD300LF/PTPN6/TLR4/CASP1/PTPRC/TREM2/GAS6/TLR2/CSF1/SH2B3/SIGIRR/SAMHD1/SLIT2/NLRC5/IRF7/SOCS3/CCL5	19	geneontology_Biological_Process	0.0263889	Up
GO:0050850	positive regulation of calcium-mediated signaling	8/720	43/18866	0.000191932	0.00153058	0.00111598	CD4/P2RY6/ZAP70/CD3E/TREM2/CCL4/CCL3/GSTM2	8	geneontology_Biological_Process	0.0111111	Up
GO:0022604	regulation of cell morphogenesis	36/720	499/18866	0.000203997	0.00162404	0.00118412	FGD2/ARHGAP4/CORO1A/FES/LST1/PTK2B/HCK/FGR/ITGB2/CSF1R/SEMA4A/TRIOBP/PLXND1/SHANK3/ARHGAP18/SEMA3G/UNC13D/RAC2/TRPV2/CCL2/F11R/APOE/ICAM1/SLIT2/CXCL12/SHTN1/SEMA7A/CCL3/SPP1/NEDD9/EPB41L3/SEMA4B/MAP2/MDK/SEMA6D/GBP1	36	geneontology_Biological_Process	0.05	Up
GO:0002691	regulation of cellular extravasation	7/720	33/18866	0.000205425	0.00162714	0.00118639	RIPK3/CCR2/PTAFR/ADAM8/ICAM1/CXCL12/MDK	7	geneontology_Biological_Process	0.00972222	Up
GO:0002861	regulation of inflammatory response to antigenic stimulus	7/720	33/18866	0.000205425	0.00162714	0.00118639	BTK/HLA-DRB1/HLA-E/FCGR2B/FCER1G/C3/GPX1	7	geneontology_Biological_Process	0.00972222	Up
GO:0045920	negative regulation of exocytosis	7/720	33/18866	0.000205425	0.00162714	0.00118639	CCR2/FCGR2B/CD300A/LGALS9/SNCA/HMOX1/CD84	7	geneontology_Biological_Process	0.00972222	Up
GO:0001667	ameboidal-type cell migration	35/720	481/18866	0.000211703	0.00167406	0.00122059	ARHGAP4/PTK2B/TNFSF12/ITGB2/STAT5A/SEMA4A/SOX17/ARHGDIB/PLXND1/LPXN/ACVRL1/HYAL2/SEMA3G/PDGFB/PTPRM/TEK/PLEKHG5/VASH1/SH3BP1/HMOX1/APOE/CD40/TGFBR2/CDH5/SLIT2/GPX1/GRN/SEMA7A/CYGB/HYAL1/SEMA4B/SEMA6D/SMOC2/AGT/ITGB3	35	geneontology_Biological_Process	0.0486111	Up
GO:1904894	positive regulation of receptor signaling pathway via STAT	12/720	93/18866	0.000213703	0.00168703	0.00123006	IL10RA/HCLS1/IL18/PTK2B/CSF1R/CD300A/OSM/CD40/SOCS3/LIF/CCL5/AGT	12	geneontology_Biological_Process	0.0166667	Up
GO:0061041	regulation of wound healing	16/720	151/18866	0.000217956	0.00171486	0.00125034	ALOX5/PLEK/CLEC7A/PRKCD/TLR4/FCER1G/SH2B3/PDGFB/SERPING1/CD34/F11R/APOE/THBD/F3/PLAT/SMOC2	16	geneontology_Biological_Process	0.0222222	Up
GO:2001056	positive regulation of cysteine-type endopeptidase activity	16/720	151/18866	0.000217956	0.00171486	0.00125034	PYCARD/CLEC7A/NLRP3/LCK/CASP1/CARD9/S100A9/LGALS9/CFLAR/SNCA/ATP2A3/F3/NLRP1/S100A8/TNFSF10/CCN2	16	geneontology_Biological_Process	0.0222222	Up
GO:0043903	regulation of symbiotic process	21/720	231/18866	0.000219122	0.00172115	0.00125493	HLA-DRB1/CD74/CD4/TRIM22/FCN1/CSF1R/PARP10/LGALS9/CCL4/CCL8/APOE/OAS1/IFITM2/CCL3/BST2/ZFP36/IFI27/CCL5/SLPI/MX1/PTX3	21	geneontology_Biological_Process	0.0291667	Up
GO:0002312	B cell activation involved in immune response	11/720	80/18866	0.000220614	0.0017271	0.00125927	MFNG/TNFSF13/PARP3/PTK2B/TLR4/FCGR2B/PTPRC/CD40/BATF/ITM2A/LFNG	11	geneontology_Biological_Process	0.0152778	Up
GO:1901224	positive regulation of NIK/NF-kappaB signaling	11/720	80/18866	0.000220614	0.0017271	0.00125927	IL18/CD14/TLR4/LGALS9/TREM2/IL1B/HAVCR2/TLR2/CD27/CD86/TCIM	11	geneontology_Biological_Process	0.0152778	Up
GO:0002438	acute inflammatory response to antigenic stimulus	6/720	24/18866	0.000225869	0.00175946	0.00128286	BTK/HLA-E/FCGR2B/FCER1G/ICAM1/C3	6	geneontology_Biological_Process	0.00833333	Up
GO:0033622	integrin activation	6/720	24/18866	0.000225869	0.00175946	0.00128286	PLEK/CX3CL1/FERMT3/CXCL12/MZB1/COL16A1	6	geneontology_Biological_Process	0.00833333	Up
GO:1903306	negative regulation of regulated secretory pathway	6/720	24/18866	0.000225869	0.00175946	0.00128286	CCR2/FCGR2B/CD300A/LGALS9/HMOX1/CD84	6	geneontology_Biological_Process	0.00833333	Up
GO:0051222	positive regulation of protein transport	28/720	354/18866	0.000234626	0.00182465	0.0013304	ITGAM/HLA-DRB1/HCLS1/PRKCD/CD14/HLA-E/TLR4/EDEM2/FGR/ITGB2/CD33/ABCG1/TREM2/IL1B/GAS6/HYAL2/TLR2/PLA2G6/MICALL2/RAPGEF3/CLEC5A/SCAMP5/CD34/RAC2/ADAM8/CLEC4E/GPR68/SYBU	28	geneontology_Biological_Process	0.0388889	Up
GO:1903169	regulation of calcium ion transmembrane transport	16/720	152/18866	0.000235172	0.00182588	0.00133129	CORO1A/P2RY6/CX3CL1/PTK2B/PTPN6/APLNR/RAMP3/PLA2G6/SNCA/CXCL10/CAPN3/CYBA/GSTM2/CXCL9/CXCL11/HSPA2	16	geneontology_Biological_Process	0.0222222	Up
GO:0032642	regulation of chemokine production	10/720	68/18866	0.00024185	0.00187464	0.00136684	CD74/CLEC7A/TLR4/IL17RA/SIRPA/LGALS9/TREM2/IL1B/HAVCR2/TLR2	10	geneontology_Biological_Process	0.0138889	Up
GO:0010919	regulation of inositol phosphate biosynthetic process	5/720	16/18866	0.000245519	0.00188753	0.00137624	PLEK/P2RY6/PTAFR/PTK2B/SNCA	5	geneontology_Biological_Process	0.00694444	Up
GO:0010934	macrophage cytokine production	5/720	16/18866	0.000245519	0.00188753	0.00137624	CD74/LILRB1/TLR4/GAS6/SEMA7A	5	geneontology_Biological_Process	0.00694444	Up
GO:0033033	negative regulation of myeloid cell apoptotic process	5/720	16/18866	0.000245519	0.00188753	0.00137624	CCR5/FCER1G/CLEC5A/IRF7/CCL5	5	geneontology_Biological_Process	0.00694444	Up
GO:0045953	negative regulation of natural killer cell mediated cytotoxicity	5/720	16/18866	0.000245519	0.00188753	0.00137624	LILRB1/HLA-E/ARRB2/LGALS9/HAVCR2	5	geneontology_Biological_Process	0.00694444	Up
GO:0072109	glomerular mesangium development	5/720	16/18866	0.000245519	0.00188753	0.00137624	CFLAR/PDGFB/CD34/ACTA2/EGR1	5	geneontology_Biological_Process	0.00694444	Up
GO:0050732	negative regulation of peptidyl-tyrosine phosphorylation	9/720	56/18866	0.000247869	0.00190248	0.00138715	PRKCD/PTPN6/SAMSN1/PTPRC/CD300A/HYAL2/SH2B3/MVP/SOCS3	9	geneontology_Biological_Process	0.0125	Up
GO:0007202	activation of phospholipase C activity	7/720	34/18866	0.000250246	0.00191448	0.00139589	PLCB2/RASGRP4/P2RY6/GNA15/C5AR1/CD86/AGT	7	geneontology_Biological_Process	0.00972222	Up
GO:0032814	regulation of natural killer cell activation	7/720	34/18866	0.000250246	0.00191448	0.00139589	IL18/HLA-E/FGR/TYROBP/HAVCR2/GAS6/PTPN22	7	geneontology_Biological_Process	0.00972222	Up
GO:0010810	regulation of cell-substrate adhesion	20/720	217/18866	0.000256006	0.00195537	0.0014257	CX3CL1/PTK2B/CD3E/TRIOBP/PTPRJ/ACVRL1/CSF1/UNC13D/MINK1/TEK/RAC2/JAG1/NEDD9/CCDC80/MDK/EGFL6/SMOC2/EGFLAM/GBP1/COL16A1	20	geneontology_Biological_Process	0.0277778	Up
GO:0010952	positive regulation of peptidase activity	19/720	201/18866	0.000262453	0.00200136	0.00145924	PYCARD/CLEC7A/VSIR/NLRP3/LCK/CASP1/CARD9/S100A9/LGALS9/CFLAR/SNCA/PCOLCE/ATP2A3/F3/GRN/NLRP1/S100A8/TNFSF10/CCN2	19	geneontology_Biological_Process	0.0263889	Up
GO:0014002	astrocyte development	8/720	45/18866	0.00026676	0.00202437	0.00147601	C1QA/TLR4/S100A9/TREM2/IL1B/C5AR1/GRN/S100A8	8	geneontology_Biological_Process	0.0111111	Up
GO:0032722	positive regulation of chemokine production	8/720	45/18866	0.00026676	0.00202437	0.00147601	CD74/CLEC7A/TLR4/IL17RA/LGALS9/IL1B/HAVCR2/TLR2	8	geneontology_Biological_Process	0.0111111	Up
GO:0052372	modulation by symbiont of entry into host	8/720	45/18866	0.00026676	0.00202437	0.00147601	HLA-DRB1/CD74/CD4/TRIM22/FCN1/LGALS9/IFITM2/PTX3	8	geneontology_Biological_Process	0.0111111	Up
GO:0043542	endothelial cell migration	24/720	286/18866	0.000271157	0.00205442	0.00149792	PTK2B/TNFSF12/ITGB2/STAT5A/SEMA4A/PLXND1/LPXN/ACVRL1/PDGFB/PTPRM/TEK/PLEKHG5/VASH1/SH3BP1/HMOX1/APOE/CD40/CDH5/SLIT2/GPX1/GRN/SMOC2/AGT/ITGB3	24	geneontology_Biological_Process	0.0333333	Up
GO:0014065	phosphatidylinositol 3-kinase signaling	16/720	154/18866	0.000273166	0.00206631	0.0015066	NCF1/HCLS1/IL18/PTPN6/PIK3R5/FGR/PIK3AP1/HCST/OSM/PDGFB/TEK/PIK3IP1/CCL5/HGF/IER3/AGT	16	geneontology_Biological_Process	0.0222222	Up
GO:0000302	response to reactive oxygen species	21/720	235/18866	0.000277071	0.00209249	0.00152568	RIPK3/TRPM2/BTK/NCF1/PRKCD/PTK2B/SIRPA/CFLAR/HYAL2/MAPK13/HBA2/PSAP/HBB/HMOX1/HBA1/APOE/CST3/GPX1/HYAL1/HGF/FOS	21	geneontology_Biological_Process	0.0291667	Up
GO:0043302	positive regulation of leukocyte degranulation	6/720	25/18866	0.000287672	0.00216559	0.00157898	ITGAM/PTAFR/FGR/ITGB2/VAMP8/FCER1G	6	geneontology_Biological_Process	0.00833333	Up
GO:0071677	positive regulation of mononuclear cell migration	6/720	25/18866	0.000287672	0.00216559	0.00157898	CCR2/AIF1/CXCL10/CXCL12/CCR1/CCL5	6	geneontology_Biological_Process	0.00833333	Up
GO:0045066	regulatory T cell differentiation	7/720	35/18866	0.00030261	0.00227078	0.00165568	LILRB2/VSIR/LILRB4/LGALS9/LAG3/IRF1/MDK	7	geneontology_Biological_Process	0.00972222	Up
GO:0098751	bone cell development	7/720	35/18866	0.00030261	0.00227078	0.00165568	LILRB1/PTPN6/TYROBP/SH2B3/ZNF385A/GPR68/SIGLEC15	7	geneontology_Biological_Process	0.00972222	Up
GO:0010863	positive regulation of phospholipase C activity	8/720	46/18866	0.000312257	0.00233202	0.00170033	PLCB2/RASGRP4/P2RY6/PTAFR/GNA15/C5AR1/CD86/AGT	8	geneontology_Biological_Process	0.0111111	Up
GO:0032692	negative regulation of interleukin-1 production	8/720	46/18866	0.000312257	0.00233202	0.00170033	CX3CL1/NLRP3/ARRB2/CD33/TREM2/GAS6/CX3CR1/ACP5	8	geneontology_Biological_Process	0.0111111	Up
GO:0061028	establishment of endothelial barrier	8/720	46/18866	0.000312257	0.00233202	0.00170033	IL1B/ENG/RAPGEF3/ROBO4/F11R/ICAM1/CDH5/CLDN5	8	geneontology_Biological_Process	0.0111111	Up
GO:0060348	bone development	19/720	204/18866	0.000316893	0.00236288	0.00172284	LILRB1/PTPN6/TYROBP/PTPRC/ENG/SH2B3/TEK/ZNF385A/TGFBR2/LTBP3/GPR68/DHRS3/SULF1/CHAD/BGLAP/SFRP4/SIGLEC15/EPYC/ACP5	19	geneontology_Biological_Process	0.0263889	Up
GO:1901216	positive regulation of neuron death	12/720	97/18866	0.000318361	0.00237008	0.00172808	ITGAM/C1QA/TLR4/ITGB2/FCGR2B/TYROBP/SNCA/GRN/CTSZ/CCL3/FOS/EGR1	12	geneontology_Biological_Process	0.0166667	Up
GO:0050714	positive regulation of protein secretion	17/720	172/18866	0.000323141	0.00240159	0.00175106	HLA-DRB1/CD14/HLA-E/TLR4/FGR/CD33/ABCG1/TREM2/TLR2/PLA2G6/CLEC5A/SCAMP5/CD34/ADAM8/CLEC4E/GPR68/SYBU	17	geneontology_Biological_Process	0.0236111	Up
GO:0010466	negative regulation of peptidase activity	23/720	272/18866	0.000323615	0.00240159	0.00175106	ARRB2/SERPINA1/CFLAR/GAS6/NAIP/SPINT2/RENBP/CSTA/SERPING1/SNCA/CD27/CST3/ITIH4/C3/C4B/GPX1/C4A/BST2/CST7/IFI6/SLPI/HGF/AGT	23	geneontology_Biological_Process	0.0319444	Up
GO:0051346	negative regulation of hydrolase activity	34/720	473/18866	0.00032457	0.00240489	0.00175346	NCKAP1L/ARRB2/GMIP/SERPINA1/CFLAR/GAS6/NAIP/SPINT2/RENBP/CSTA/SERPING1/SNCA/CD27/SPOCD1/NEIL1/RASA4/F11R/CST3/SLIT2/ITIH4/C3/C4B/GPX1/APOC1/C4A/BST2/CST7/IFI6/MAP2/SLPI/HGF/GZMA/PTX3/AGT	34	geneontology_Biological_Process	0.0472222	Up
GO:0002716	negative regulation of natural killer cell mediated immunity	5/720	17/18866	0.000336942	0.00248482	0.00181174	LILRB1/HLA-E/ARRB2/LGALS9/HAVCR2	5	geneontology_Biological_Process	0.00694444	Up
GO:0016045	detection of bacterium	5/720	17/18866	0.000336942	0.00248482	0.00181174	HLA-DRB1/CD1D/NAIP/TLR2/TLR1	5	geneontology_Biological_Process	0.00694444	Up
GO:0060263	regulation of respiratory burst	5/720	17/18866	0.000336942	0.00248482	0.00181174	CLEC7A/SLAMF8/JCHAIN/RAC2/GRN	5	geneontology_Biological_Process	0.00694444	Up
GO:1903900	regulation of viral life cycle	16/720	157/18866	0.000340084	0.00250406	0.00182577	HLA-DRB1/CD74/CD4/TRIM22/FCN1/PARP10/LGALS9/CCL8/OAS1/IFITM2/BST2/IFI27/CCL5/SLPI/MX1/PTX3	16	geneontology_Biological_Process	0.0222222	Up
GO:0017157	regulation of exocytosis	20/720	222/18866	0.00034524	0.00253805	0.00185055	ITGAM/CCR2/FES/PTAFR/STXBP2/FGR/ITGB2/FCGR2B/CD300A/LGALS9/VAMP8/FCER1G/PLA2G6/ADGRE2/UNC13D/SNCA/SCAMP5/RAC2/HMOX1/CD84	20	geneontology_Biological_Process	0.0277778	Up
GO:0048010	vascular endothelial growth factor receptor signaling pathway	12/720	98/18866	0.000350437	0.00257224	0.00187548	NCF4/NCF1/CYBB/VAV1/PTK2B/NCKAP1L/IL1B/HHEX/NCF2/CYBA/SULF1/ITGB3	12	geneontology_Biological_Process	0.0166667	Up
GO:0046425	regulation of receptor signaling pathway via JAK-STAT	15/720	142/18866	0.000351029	0.00257257	0.00187572	IL10RA/HCLS1/IL18/PTK2B/CSF1R/JAK3/PTPRC/CD300A/OSM/SH2B3/CD40/SOCS3/LIF/CCL5/AGT	15	geneontology_Biological_Process	0.0208333	Up
GO:0002507	tolerance induction	6/720	26/18866	0.000361998	0.00263573	0.00192177	LILRB2/HLA-E/CD3E/LGALS9/HAVCR2/TGFBR2	6	geneontology_Biological_Process	0.00833333	Up
GO:0042832	defense response to protozoan	6/720	26/18866	0.000361998	0.00263573	0.00192177	IRF8/CLEC7A/CD40/SLC11A1/BATF/GBP4	6	geneontology_Biological_Process	0.00833333	Up
GO:0072012	glomerulus vasculature development	6/720	26/18866	0.000361998	0.00263573	0.00192177	CFLAR/PDGFB/TEK/CD34/ACTA2/EGR1	6	geneontology_Biological_Process	0.00833333	Up
GO:0090023	positive regulation of neutrophil chemotaxis	6/720	26/18866	0.000361998	0.00263573	0.00192177	CD74/C3AR1/NCKAP1L/C5AR1/RAC2/MDK	6	geneontology_Biological_Process	0.00833333	Up
GO:0002701	negative regulation of production of molecular mediator of immune response	7/720	36/18866	0.000363416	0.00263573	0.00192177	PARP3/CD22/LILRB1/FCGR2B/JAK3/HMOX1/BST2	7	geneontology_Biological_Process	0.00972222	Up
GO:0043368	positive T cell selection	7/720	36/18866	0.000363416	0.00263573	0.00192177	DOCK2/CD74/ZAP70/CD3E/PTPRC/CD3D/BATF	7	geneontology_Biological_Process	0.00972222	Up
GO:0032480	negative regulation of type I interferon production	8/720	47/18866	0.00036389	0.00263573	0.00192177	PYCARD/UBA7/LILRB1/DHX58/SIRPA/HAVCR2/UBE2L6/NLRC5	8	geneontology_Biological_Process	0.0111111	Up
GO:0034350	regulation of glial cell apoptotic process	4/720	10/18866	0.000367489	0.00263573	0.00192177	PRKCD/GAS6/PRKCH/CCL2	4	geneontology_Biological_Process	0.00555556	Up
GO:0034447	very-low-density lipoprotein particle clearance	4/720	10/18866	0.000367489	0.00263573	0.00192177	APOBR/APOE/APOC1/APOC2	4	geneontology_Biological_Process	0.00555556	Up
GO:0046598	positive regulation of viral entry into host cell	4/720	10/18866	0.000367489	0.00263573	0.00192177	HLA-DRB1/CD74/CD4/LGALS9	4	geneontology_Biological_Process	0.00555556	Up
GO:0070099	regulation of chemokine-mediated signaling pathway	4/720	10/18866	0.000367489	0.00263573	0.00192177	TREM2/SH2B3/SLIT2/CCL5	4	geneontology_Biological_Process	0.00555556	Up
GO:0070391	response to lipoteichoic acid	4/720	10/18866	0.000367489	0.00263573	0.00192177	CD14/TLR4/TREM2/TLR2	4	geneontology_Biological_Process	0.00555556	Up
GO:0071223	cellular response to lipoteichoic acid	4/720	10/18866	0.000367489	0.00263573	0.00192177	CD14/TLR4/TREM2/TLR2	4	geneontology_Biological_Process	0.00555556	Up
GO:0075294	positive regulation by symbiont of entry into host	4/720	10/18866	0.000367489	0.00263573	0.00192177	HLA-DRB1/CD74/CD4/LGALS9	4	geneontology_Biological_Process	0.00555556	Up
GO:0001938	positive regulation of endothelial cell proliferation	13/720	113/18866	0.000374837	0.00268433	0.00195721	EGFL7/TNFSF12/STAT5A/APLNR/ACVRL1/PDGFB/TEK/HMOX1/CXCL12/CYBA/F3/MDK/ITGB3	13	geneontology_Biological_Process	0.0180556	Up
GO:1902905	positive regulation of supramolecular fiber organization	19/720	208/18866	0.000404627	0.00289327	0.00210955	PLEK/WAS/CORO1A/FES/PYCARD/CX3CL1/PTK2B/HCK/NCKAP1L/ARPC1B/RAPGEF3/FCHSD1/ARHGEF15/APOE/GMFG/ICAM1/GPX1/CCN2/SCIN	19	geneontology_Biological_Process	0.0263889	Up
GO:0002218	activation of innate immune response	15/720	144/18866	0.000408128	0.00291298	0.00212392	CD209/CLEC10A/PYCARD/PRKCD/TLR4/FCN1/HCK/MNDA/CARD9/FCER1G/LILRA2/CLEC4E/CLEC4A/PSMB9/MUC15	15	geneontology_Biological_Process	0.0208333	Up
GO:1990748	cellular detoxification	13/720	114/18866	0.000408622	0.00291298	0.00212392	PTGS1/ALOX5AP/LTC4S/S100A9/HBA2/HBB/HBA1/APOE/GPX1/CYGB/GSTM2/HBG2/GPX3	13	geneontology_Biological_Process	0.0180556	Up
GO:0006919	activation of cysteine-type endopeptidase activity involved in apoptotic process	11/720	86/18866	0.00041895	0.00298209	0.00217431	PYCARD/NLRP3/LCK/S100A9/CFLAR/SNCA/ATP2A3/F3/NLRP1/S100A8/TNFSF10	11	geneontology_Biological_Process	0.0152778	Up
GO:0033628	regulation of cell adhesion mediated by integrin	8/720	48/18866	0.000422264	0.0029876	0.00217833	PTPN6/CD3E/NCKAP1L/FERMT3/LPXN/PODXL/LIF/CCL5	8	geneontology_Biological_Process	0.0111111	Up
GO:0043370	regulation of CD4-positive, alpha-beta T cell differentiation	8/720	48/18866	0.000422264	0.0029876	0.00217833	SASH3/IL18/NLRP3/NCKAP1L/JAK3/LGALS9/NFKBID/CD86	8	geneontology_Biological_Process	0.0111111	Up
GO:1900274	regulation of phospholipase C activity	8/720	48/18866	0.000422264	0.0029876	0.00217833	PLCB2/RASGRP4/P2RY6/PTAFR/GNA15/C5AR1/CD86/AGT	8	geneontology_Biological_Process	0.0111111	Up
GO:1904036	negative regulation of epithelial cell apoptotic process	8/720	48/18866	0.000422264	0.0029876	0.00217833	CFLAR/GAS6/TEK/HMOX1/ICAM1/CDH5/RAMP2/MDK	8	geneontology_Biological_Process	0.0111111	Up
GO:1904062	regulation of cation transmembrane transport	27/720	349/18866	0.000426557	0.00301344	0.00219717	CORO1A/CCR2/P2RY6/CX3CL1/CTSS/PTK2B/PTPN6/APLNR/RAMP3/SLC43A2/TREM2/SHANK3/PLA2G6/SNCA/MINK1/CXCL10/CCL2/SCN1B/CAPN3/CYBA/TCIRG1/GSTM2/CXCL9/CXCL11/HSPA2/SHANK1/AGT	27	geneontology_Biological_Process	0.0375	Up
GO:0030212	hyaluronan metabolic process	7/720	37/18866	0.000433621	0.00304051	0.00221691	IL1B/HYAL2/PDGFB/ITIH4/LYVE1/HYAL1/HGF	7	geneontology_Biological_Process	0.00972222	Up
GO:0048846	axon extension involved in axon guidance	7/720	37/18866	0.000433621	0.00304051	0.00221691	SEMA4A/SEMA3G/SLIT2/CXCL12/SEMA7A/SEMA4B/SEMA6D	7	geneontology_Biological_Process	0.00972222	Up
GO:0062208	positive regulation of pattern recognition receptor signaling pathway	7/720	37/18866	0.000433621	0.00304051	0.00221691	TLR4/DHX58/TLR2/TLR1/TLR5/PTPN22/CYBA	7	geneontology_Biological_Process	0.00972222	Up
GO:1902284	neuron projection extension involved in neuron projection guidance	7/720	37/18866	0.000433621	0.00304051	0.00221691	SEMA4A/SEMA3G/SLIT2/CXCL12/SEMA7A/SEMA4B/SEMA6D	7	geneontology_Biological_Process	0.00972222	Up
GO:1904994	regulation of leukocyte adhesion to vascular endothelial cell	7/720	37/18866	0.000433621	0.00304051	0.00221691	ALOX5/CCR2/PTAFR/ITGB2/ICAM1/CXCL12/MDK	7	geneontology_Biological_Process	0.00972222	Up
GO:0002793	positive regulation of peptide secretion	18/720	193/18866	0.000443771	0.00310706	0.00226543	HLA-DRB1/CD14/HLA-E/TLR4/FGR/CD33/ABCG1/TREM2/TLR2/PLA2G6/CLEC5A/SCAMP5/CD34/ADAM8/CLEC4E/GPR68/S100A8/SYBU	18	geneontology_Biological_Process	0.025	Up
GO:0001562	response to protozoan	6/720	27/18866	0.000450533	0.00313639	0.00228682	IRF8/CLEC7A/CD40/SLC11A1/BATF/GBP4	6	geneontology_Biological_Process	0.00833333	Up
GO:0002825	regulation of T-helper 1 type immune response	6/720	27/18866	0.000450533	0.00313639	0.00228682	CCR2/IL18/JAK3/IL1B/HAVCR2/SLC11A1	6	geneontology_Biological_Process	0.00833333	Up
GO:0045672	positive regulation of osteoclast differentiation	6/720	27/18866	0.000450533	0.00313639	0.00228682	TYROBP/TREM2/CSF1/CCR1/GPR68/FOS	6	geneontology_Biological_Process	0.00833333	Up
GO:0061572	actin filament bundle organization	16/720	161/18866	0.000450979	0.00313639	0.00228682	PLEK/WAS/AIF1/CX3CL1/PTK2B/LCP1/SHANK3/ZYX/RAPGEF3/F11R/ARHGEF15/S1PR1/SHTN1/NEDD9/CCN2/SHANK1	16	geneontology_Biological_Process	0.0222222	Up
GO:0034375	high-density lipoprotein particle remodeling	5/720	18/18866	0.00045196	0.00313639	0.00228682	ABCG1/APOE/APOC1/PLTP/APOC2	5	geneontology_Biological_Process	0.00694444	Up
GO:0043011	myeloid dendritic cell differentiation	5/720	18/18866	0.00045196	0.00313639	0.00228682	SPI1/BATF3/TGFBR2/BATF/DCSTAMP	5	geneontology_Biological_Process	0.00694444	Up
GO:1904951	positive regulation of establishment of protein localization	28/720	370/18866	0.000478535	0.00331359	0.00241601	ITGAM/HLA-DRB1/HCLS1/PRKCD/CD14/HLA-E/TLR4/EDEM2/FGR/ITGB2/CD33/ABCG1/TREM2/IL1B/GAS6/HYAL2/TLR2/PLA2G6/MICALL2/RAPGEF3/CLEC5A/SCAMP5/CD34/RAC2/ADAM8/CLEC4E/GPR68/SYBU	28	geneontology_Biological_Process	0.0388889	Up
GO:0031343	positive regulation of cell killing	9/720	61/18866	0.000478903	0.00331359	0.00241601	ITGAM/CLEC7A/VAV1/HLA-E/TYROBP/PTPRC/CD1D/LAG3/PRF1	9	geneontology_Biological_Process	0.0125	Up
GO:2001236	regulation of extrinsic apoptotic signaling pathway	16/720	162/18866	0.000483122	0.00333787	0.00243372	PYCARD/TMC8/CX3CL1/TNFSF12/PTPRC/CFLAR/IL1B/HYAL2/HMOX1/ICAM1/GPX1/G0S2/IFI6/TNFSF10/HGF/AGT	16	geneontology_Biological_Process	0.0222222	Up
GO:1903036	positive regulation of response to wounding	10/720	74/18866	0.000486741	0.00335794	0.00244836	PLEK/CLEC7A/TLR4/SCARF1/F11R/THBD/F3/GRN/MDK/SMOC2	10	geneontology_Biological_Process	0.0138889	Up
GO:0030278	regulation of ossification	19/720	212/18866	0.00051273	0.00353206	0.00257531	ALOX5/PTK2B/RASSF2/CSF1/CEBPA/JAG1/S1PR1/LTBP3/CCR1/PDLIM7/DHRS3/ANKH/CCL3/SRGN/TCIRG1/BGLAP/MDK/HGF/SMOC1	19	geneontology_Biological_Process	0.0263889	Up
GO:0032689	negative regulation of interferon-gamma production	7/720	38/18866	0.00051424	0.00353211	0.00257535	HLA-DRB1/VSIR/LILRB1/TLR4/LGALS9/HAVCR2/GAS6	7	geneontology_Biological_Process	0.00972222	Up
GO:0071604	transforming growth factor beta production	7/720	38/18866	0.00051424	0.00353211	0.00257535	CX3CL1/NRROS/TYROBP/LGALS9/CD34/LTBP3/CD200	7	geneontology_Biological_Process	0.00972222	Up
GO:0051494	negative regulation of cytoskeleton organization	16/720	163/18866	0.000517212	0.00354735	0.00258646	WAS/CORO1A/PRKCD/TRIOBP/SHANK3/CAPG/SNCA/KANK3/F11R/GMFG/S1PR1/CDH5/SLIT2/MAP2/SHANK1/SCIN	16	geneontology_Biological_Process	0.0222222	Up
GO:0070527	platelet aggregation	9/720	62/18866	0.000541572	0.00370363	0.0027004	PLEK/PRKCD/PTPN6/FERMT3/SH2B3/HBB/F11R/MYL9/ITGB3	9	geneontology_Biological_Process	0.0125	Up
GO:2000351	regulation of endothelial cell apoptotic process	9/720	62/18866	0.000541572	0.00370363	0.0027004	GAS6/TEK/COL18A1/CCL2/CD40/ICAM1/CDH5/RAMP2/ECSCR	9	geneontology_Biological_Process	0.0125	Up
GO:0010818	T cell chemotaxis	6/720	28/18866	0.000555072	0.00376857	0.00274775	CCR2/CXCL16/CXCL10/CCL3/CCL5/CXCL11	6	geneontology_Biological_Process	0.00833333	Up
GO:0060143	positive regulation of syncytium formation by plasma membrane fusion	6/720	28/18866	0.000555072	0.00376857	0.00274775	CD53/TYROBP/TREM2/RAPGEF3/CXCL9/DCSTAMP	6	geneontology_Biological_Process	0.00833333	Up
GO:0061437	renal system vasculature development	6/720	28/18866	0.000555072	0.00376857	0.00274775	CFLAR/PDGFB/TEK/CD34/ACTA2/EGR1	6	geneontology_Biological_Process	0.00833333	Up
GO:0061440	kidney vasculature development	6/720	28/18866	0.000555072	0.00376857	0.00274775	CFLAR/PDGFB/TEK/CD34/ACTA2/EGR1	6	geneontology_Biological_Process	0.00833333	Up
GO:1902668	negative regulation of axon guidance	6/720	28/18866	0.000555072	0.00376857	0.00274775	SEMA4A/SEMA3G/SLIT2/SEMA7A/SEMA4B/SEMA6D	6	geneontology_Biological_Process	0.00833333	Up
GO:0003093	regulation of glomerular filtration	4/720	11/18866	0.000560081	0.00376993	0.00274875	GAS6/PDGFB/GJA5/CYBA	4	geneontology_Biological_Process	0.00555556	Up
GO:0033632	regulation of cell-cell adhesion mediated by integrin	4/720	11/18866	0.000560081	0.00376993	0.00274875	CD3E/FERMT3/PODXL/CCL5	4	geneontology_Biological_Process	0.00555556	Up
GO:0035747	natural killer cell chemotaxis	4/720	11/18866	0.000560081	0.00376993	0.00274875	CCL4/CCL2/CCL3/CCL5	4	geneontology_Biological_Process	0.00555556	Up
GO:0070673	response to interleukin-18	4/720	11/18866	0.000560081	0.00376993	0.00274875	ALOX5/IL18/PDGFB/IL18BP	4	geneontology_Biological_Process	0.00555556	Up
GO:0097048	dendritic cell apoptotic process	4/720	11/18866	0.000560081	0.00376993	0.00274875	LILRB1/LGALS9/GAS6/CXCL12	4	geneontology_Biological_Process	0.00555556	Up
GO:2000668	regulation of dendritic cell apoptotic process	4/720	11/18866	0.000560081	0.00376993	0.00274875	LILRB1/LGALS9/GAS6/CXCL12	4	geneontology_Biological_Process	0.00555556	Up
GO:0001961	positive regulation of cytokine-mediated signaling pathway	8/720	50/18866	0.000561828	0.0037709	0.00274945	CD74/CD300LF/CASP1/TREM2/GAS6/CSF1/NLRC5/IRF7	8	geneontology_Biological_Process	0.0111111	Up
GO:0030195	negative regulation of blood coagulation	8/720	50/18866	0.000561828	0.0037709	0.00274945	PRKCD/SH2B3/PDGFB/SERPING1/CD34/APOE/THBD/PLAT	8	geneontology_Biological_Process	0.0111111	Up
GO:0010950	positive regulation of endopeptidase activity	17/720	181/18866	0.000583991	0.00391407	0.00285384	PYCARD/CLEC7A/VSIR/NLRP3/LCK/CASP1/CARD9/S100A9/LGALS9/CFLAR/SNCA/ATP2A3/F3/NLRP1/S100A8/TNFSF10/CCN2	17	geneontology_Biological_Process	0.0236111	Up
GO:0010544	negative regulation of platelet activation	5/720	19/18866	0.000594231	0.00396013	0.00288743	PRKCD/SH2B3/PDGFB/APOE/THBD	5	geneontology_Biological_Process	0.00694444	Up
GO:0045780	positive regulation of bone resorption	5/720	19/18866	0.000594231	0.00396013	0.00288743	ADAM8/TNFRSF11A/LTBP3/SPP1/DCSTAMP	5	geneontology_Biological_Process	0.00694444	Up
GO:0046852	positive regulation of bone remodeling	5/720	19/18866	0.000594231	0.00396013	0.00288743	ADAM8/TNFRSF11A/LTBP3/SPP1/DCSTAMP	5	geneontology_Biological_Process	0.00694444	Up
GO:0061081	positive regulation of myeloid leukocyte cytokine production involved in immune response	5/720	19/18866	0.000594231	0.00396013	0.00288743	CD74/LILRB1/TLR4/FCER1G/SEMA7A	5	geneontology_Biological_Process	0.00694444	Up
GO:0033077	T cell differentiation in thymus	10/720	76/18866	0.000604034	0.00401977	0.00293091	RIPK3/DOCK2/CD74/ZAP70/CD3E/PTPRC/CD3D/IL1B/NFKBID/ADAM8	10	geneontology_Biological_Process	0.0138889	Up
GO:0032691	negative regulation of interleukin-1 beta production	7/720	39/18866	0.000606349	0.00402948	0.00293799	CX3CL1/NLRP3/ARRB2/CD33/TREM2/CX3CR1/ACP5	7	geneontology_Biological_Process	0.00972222	Up
GO:0002762	negative regulation of myeloid leukocyte differentiation	8/720	51/18866	0.000644406	0.00426432	0.00310921	C1QC/LILRB1/INPP5D/TLR4/LILRB4/GPR68/GPR137B/CCL3	8	geneontology_Biological_Process	0.0111111	Up
GO:0071827	plasma lipoprotein particle organization	8/720	51/18866	0.000644406	0.00426432	0.00310921	ABCG1/GPIHBP1/APOE/APOC1/PLTP/PLA2G5/APOC2/AGT	8	geneontology_Biological_Process	0.0111111	Up
GO:1900047	negative regulation of hemostasis	8/720	51/18866	0.000644406	0.00426432	0.00310921	PRKCD/SH2B3/PDGFB/SERPING1/CD34/APOE/THBD/PLAT	8	geneontology_Biological_Process	0.0111111	Up
GO:0097006	regulation of plasma lipoprotein particle levels	12/720	105/18866	0.000660897	0.0043673	0.0031843	ABCG1/MSR1/GPIHBP1/NPC2/APOBR/HMOX1/APOE/APOC1/PLTP/PLA2G5/APOC2/AGT	12	geneontology_Biological_Process	0.0166667	Up
GO:0001959	regulation of cytokine-mediated signaling pathway	17/720	183/18866	0.000661838	0.00436739	0.00318437	CD74/PYCARD/CD300LF/PTPN6/CASP1/PTPRC/TREM2/GAS6/CSF1/SH2B3/SIGIRR/SAMHD1/SLIT2/NLRC5/IRF7/SOCS3/CCL5	17	geneontology_Biological_Process	0.0236111	Up
GO:1904892	regulation of receptor signaling pathway via STAT	15/720	151/18866	0.000674956	0.00444771	0.00324293	IL10RA/HCLS1/IL18/PTK2B/CSF1R/JAK3/PTPRC/CD300A/OSM/SH2B3/CD40/SOCS3/LIF/CCL5/AGT	15	geneontology_Biological_Process	0.0208333	Up
GO:0045671	negative regulation of osteoclast differentiation	6/720	29/18866	0.000677514	0.0044521	0.00324613	LILRB1/INPP5D/TLR4/LILRB4/GPR137B/CCL3	6	geneontology_Biological_Process	0.00833333	Up
GO:0071624	positive regulation of granulocyte chemotaxis	6/720	29/18866	0.000677514	0.0044521	0.00324613	CD74/C3AR1/NCKAP1L/C5AR1/RAC2/MDK	6	geneontology_Biological_Process	0.00833333	Up
GO:0051056	regulation of small GTPase mediated signal transduction	25/720	323/18866	0.000681584	0.0044726	0.00326107	FGD2/ARHGAP4/RASAL3/ARHGAP30/RASA4B/ARHGAP9/RASGRP4/VAV1/CYTH4/PSD4/ARHGAP25/ARHGDIB/GMIP/ARHGAP18/CSF1/PLEKHG5/SH3BP1/RAC2/ARAP3/RASA4/F11R/APOE/LPAR6/SLIT2/ARHGAP45	25	geneontology_Biological_Process	0.0347222	Up
GO:0002437	inflammatory response to antigenic stimulus	9/720	64/18866	0.000687111	0.00449632	0.00327837	BTK/HLA-DRB1/HLA-E/FCGR2B/FCER1G/CD68/ICAM1/C3/GPX1	9	geneontology_Biological_Process	0.0125	Up
GO:0032835	glomerulus development	9/720	64/18866	0.000687111	0.00449632	0.00327837	CFLAR/PDGFB/TEK/CD34/JAG1/PODXL/SULF1/ACTA2/EGR1	9	geneontology_Biological_Process	0.0125	Up
GO:0002714	positive regulation of B cell mediated immunity	7/720	40/18866	0.000711084	0.00463386	0.00337866	BTK/TNFSF13/HLA-E/PTPRC/FCER1G/CD40/C3	7	geneontology_Biological_Process	0.00972222	Up
GO:0002891	positive regulation of immunoglobulin mediated immune response	7/720	40/18866	0.000711084	0.00463386	0.00337866	BTK/TNFSF13/HLA-E/PTPRC/FCER1G/CD40/C3	7	geneontology_Biological_Process	0.00972222	Up
GO:0071526	semaphorin-plexin signaling pathway	7/720	40/18866	0.000711084	0.00463386	0.00337866	SEMA4A/PLXND1/SEMA3G/SH3BP1/SEMA7A/SEMA4B/SEMA6D	7	geneontology_Biological_Process	0.00972222	Up
GO:0034446	substrate adhesion-dependent cell spreading	12/720	106/18866	0.00071996	0.00468521	0.0034161	PARVG/FERMT3/TRIOBP/LPXN/MICALL2/UNC13D/TEK/MERTK/NEDD9/MDK/GBP1/ITGB3	12	geneontology_Biological_Process	0.0166667	Up
GO:0043367	CD4-positive, alpha-beta T cell differentiation	10/720	78/18866	0.000743758	0.0048334	0.00352415	SASH3/IL18/NLRP3/SEMA4A/NCKAP1L/JAK3/LGALS9/NFKBID/CD86/BATF	10	geneontology_Biological_Process	0.0138889	Up
GO:0042063	gliogenesis	24/720	307/18866	0.000752569	0.00488391	0.00356098	CCR2/C1QA/HDAC10/CX3CL1/PTK2B/NRROS/TLR4/CSF1R/S100A9/TNFRSF1B/TREM2/IL1B/TLR2/CSF1/C5AR1/PRKCH/CCL2/SLC45A3/CX3CR1/GRN/CCL3/S100A8/LIF/MDK	24	geneontology_Biological_Process	0.0333333	Up
GO:0019730	antimicrobial humoral response	14/720	137/18866	0.000761632	0.00493592	0.00359889	LYZ/HLA-E/S100A9/RNASE6/PLA2G6/JCHAIN/CXCL10/SLC11A1/S100A8/GNLY/CXCL2/CXCL9/SLPI/CXCL11	14	geneontology_Biological_Process	0.0194444	Up
GO:0007252	I-kappaB phosphorylation	5/720	20/18866	0.000767603	0.00496095	0.00361715	CX3CL1/TLR4/SIRPA/TLR2/CX3CR1	5	geneontology_Biological_Process	0.00694444	Up
GO:0015669	gas transport	5/720	20/18866	0.000767603	0.00496095	0.00361715	HBA2/HBB/HBA1/CYGB/HBG2	5	geneontology_Biological_Process	0.00694444	Up
GO:0045834	positive regulation of lipid metabolic process	15/720	153/18866	0.000774146	0.00499637	0.00364297	CD74/PRKCD/PTK2B/FGR/ABCG1/IL1B/PLA2G6/TAZ/PDGFB/TEK/APOE/SLC45A3/APOC1/APOC2/AGT	15	geneontology_Biological_Process	0.0208333	Up
GO:0097237	cellular response to toxic substance	13/720	122/18866	0.000784382	0.0050555	0.00368609	PTGS1/ALOX5AP/LTC4S/S100A9/HBA2/HBB/HBA1/APOE/GPX1/CYGB/GSTM2/HBG2/GPX3	13	geneontology_Biological_Process	0.0180556	Up
GO:0002863	positive regulation of inflammatory response to antigenic stimulus	4/720	12/18866	0.000814839	0.00519047	0.00378449	BTK/HLA-E/FCER1G/C3	4	geneontology_Biological_Process	0.00555556	Up
GO:0033700	phospholipid efflux	4/720	12/18866	0.000814839	0.00519047	0.00378449	ABCG1/APOE/APOC1/APOC2	4	geneontology_Biological_Process	0.00555556	Up
GO:0061517	macrophage proliferation	4/720	12/18866	0.000814839	0.00519047	0.00378449	CX3CL1/CSF1R/TREM2/CSF1	4	geneontology_Biological_Process	0.00555556	Up
GO:0070278	extracellular matrix constituent secretion	4/720	12/18866	0.000814839	0.00519047	0.00378449	TNFRSF1B/ENG/CCN2/AGT	4	geneontology_Biological_Process	0.00555556	Up
GO:2001204	regulation of osteoclast development	4/720	12/18866	0.000814839	0.00519047	0.00378449	LILRB1/TYROBP/GPR68/SIGLEC15	4	geneontology_Biological_Process	0.00555556	Up
GO:0046330	positive regulation of JNK cascade	14/720	138/18866	0.000818594	0.00519047	0.00378449	FGD2/NCF1/PYCARD/PTK2B/TLR4/FCGR2B/CARD9/IL1B/RASSF2/MINK1/CD27/TNFRSF11A/MAP4K1/CCN2	14	geneontology_Biological_Process	0.0194444	Up
GO:0032728	positive regulation of interferon-beta production	6/720	30/18866	0.000819856	0.00519047	0.00378449	IRF5/TLR4/DHX58/TLR2/IRF1/IRF7	6	geneontology_Biological_Process	0.00833333	Up
GO:0035666	TRIF-dependent toll-like receptor signaling pathway	6/720	30/18866	0.000819856	0.00519047	0.00378449	CD300LF/CD14/TLR4/LY96/CD40/IRF7	6	geneontology_Biological_Process	0.00833333	Up
GO:0060055	angiogenesis involved in wound healing	6/720	30/18866	0.000819856	0.00519047	0.00378449	ALOX5/CX3CL1/CD34/GPX1/SMOC2/ITGB3	6	geneontology_Biological_Process	0.00833333	Up
GO:0070168	negative regulation of biomineral tissue development	6/720	30/18866	0.000819856	0.00519047	0.00378449	PTK2B/GAS6/LTBP3/CCR1/CCL3/SRGN	6	geneontology_Biological_Process	0.00833333	Up
GO:0110150	negative regulation of biomineralization	6/720	30/18866	0.000819856	0.00519047	0.00378449	PTK2B/GAS6/LTBP3/CCR1/CCL3/SRGN	6	geneontology_Biological_Process	0.00833333	Up
GO:0014909	smooth muscle cell migration	11/720	93/18866	0.000820767	0.00519047	0.00378449	AIF1/P2RY6/PDGFB/SLIT2/NDRG4/PLAT/CCL5/MDK/SEMA6D/AGT/ITGB3	11	geneontology_Biological_Process	0.0152778	Up
GO:0061097	regulation of protein tyrosine kinase activity	11/720	93/18866	0.000820767	0.00519047	0.00378449	NCF1/CSF1R/PTPRC/GAS6/HYAL2/FCGR1A/PDGFB/MVP/NEDD9/CCL5/AGT	11	geneontology_Biological_Process	0.0152778	Up
GO:1903035	negative regulation of response to wounding	11/720	93/18866	0.000820767	0.00519047	0.00378449	ALOX5/PRKCD/SH2B3/PDGFB/SERPING1/CD34/APOE/THBD/SPP1/PLAT/MDK	11	geneontology_Biological_Process	0.0152778	Up
GO:0043407	negative regulation of MAP kinase activity	10/720	79/18866	0.000823005	0.00519067	0.00378464	PRKCD/PTPN6/CD300A/IL1B/PTPRJ/HYAL2/SH2B3/PTPN22/APOE/AGT	10	geneontology_Biological_Process	0.0138889	Up
GO:0071260	cellular response to mechanical stimulus	10/720	79/18866	0.000823005	0.00519067	0.00378464	TLR4/CASP1/IL1B/ENG/TLR5/IRF1/F11R/CD40/CYBA/AGT	10	geneontology_Biological_Process	0.0138889	Up
GO:0030890	positive regulation of B cell proliferation	7/720	41/18866	0.000829634	0.00521152	0.00379984	SASH3/CD74/TLR4/NCKAP1L/PTPRC/TNFSF13B/CD40	7	geneontology_Biological_Process	0.00972222	Up
GO:0038083	peptidyl-tyrosine autophosphorylation	7/720	41/18866	0.000829634	0.00521152	0.00379984	FES/PTK2B/ZAP70/HCK/FGR/LCK/SLA	7	geneontology_Biological_Process	0.00972222	Up
GO:0042269	regulation of natural killer cell mediated cytotoxicity	7/720	41/18866	0.000829634	0.00521152	0.00379984	VAV1/LILRB1/HLA-E/ARRB2/LGALS9/HAVCR2/LAG3	7	geneontology_Biological_Process	0.00972222	Up
GO:0034599	cellular response to oxidative stress	24/720	310/18866	0.000861872	0.00540681	0.00394223	RIPK3/ALOX5/TRPM2/NCF4/BTK/NCF1/AIF1/CYBB/PRKCD/TLR4/SIRPA/CFLAR/NCF2/MAPK13/SNCA/PSAP/HMOX1/CST3/EPAS1/GPX1/CYBA/HGF/FOS/GPX3	24	geneontology_Biological_Process	0.0333333	Up
GO:0050922	negative regulation of chemotaxis	9/720	66/18866	0.000863084	0.0054072	0.00394252	AIF1/SLAMF8/SEMA4A/SEMA3G/CCL2/SLIT2/SEMA7A/SEMA4B/SEMA6D	9	geneontology_Biological_Process	0.0125	Up
GO:1905954	positive regulation of lipid localization	11/720	94/18866	0.000898182	0.00561961	0.00409739	PRKCD/ABCG1/IL1B/MSR1/ACSL5/PLA2G6/TNFRSF11A/APOE/C3/PLTP/SPP1	11	geneontology_Biological_Process	0.0152778	Up
GO:0002693	positive regulation of cellular extravasation	5/720	21/18866	0.000976097	0.00606676	0.00442342	CCR2/PTAFR/ADAM8/ICAM1/MDK	5	geneontology_Biological_Process	0.00694444	Up
GO:0006837	serotonin transport	5/720	21/18866	0.000976097	0.00606676	0.00442342	LILRB1/FCER1G/SNCA/MAOB/ITGB3	5	geneontology_Biological_Process	0.00694444	Up
GO:0030502	negative regulation of bone mineralization	5/720	21/18866	0.000976097	0.00606676	0.00442342	PTK2B/LTBP3/CCR1/CCL3/SRGN	5	geneontology_Biological_Process	0.00694444	Up
GO:0048305	immunoglobulin secretion	5/720	21/18866	0.000976097	0.00606676	0.00442342	CD22/HLA-E/TNFSF13B/CD40/POU2F2	5	geneontology_Biological_Process	0.00694444	Up
GO:0140131	positive regulation of lymphocyte chemotaxis	5/720	21/18866	0.000976097	0.00606676	0.00442342	CCR2/PTK2B/CCL4/CCL3/CCL5	5	geneontology_Biological_Process	0.00694444	Up
GO:1903725	regulation of phospholipid metabolic process	11/720	95/18866	0.000981542	0.00609255	0.00444223	PRKCD/PTK2B/PIK3R5/FGR/TAZ/PDGFB/TEK/PIK3IP1/APOC1/SOCS3/APOC2	11	geneontology_Biological_Process	0.0152778	Up
GO:0003014	renal system process	13/720	125/18866	0.000985456	0.00610879	0.00445406	ADCY4/GAS6/HYAL2/SGK1/PDGFB/GJA5/JCHAIN/CD34/PSAP/HBB/CYBA/SULF1/AGT	13	geneontology_Biological_Process	0.0180556	Up
GO:0030308	negative regulation of cell growth	17/720	190/18866	0.00100827	0.00624198	0.00455118	ARHGAP4/SEMA4A/SOX17/PTPRJ/ACVRL1/HYAL2/SEMA3G/SLIT2/SEMA7A/SPP1/BST2/HYAL1/SEMA4B/MAP2/SEMA6D/DCSTAMP/AGT	17	geneontology_Biological_Process	0.0236111	Up
GO:0051017	actin filament bundle assembly	15/720	157/18866	0.00100998	0.00624435	0.0045529	PLEK/WAS/AIF1/CX3CL1/PTK2B/LCP1/SHANK3/ZYX/RAPGEF3/F11R/ARHGEF15/S1PR1/NEDD9/CCN2/SHANK1	15	geneontology_Biological_Process	0.0208333	Up
GO:0002637	regulation of immunoglobulin production	9/720	68/18866	0.00107403	0.00662294	0.00482894	SASH3/TNFSF13/PARP3/CD22/HLA-E/FCGR2B/PTPRC/CD40/MZB1	9	geneontology_Biological_Process	0.0125	Up
GO:0072577	endothelial cell apoptotic process	9/720	68/18866	0.00107403	0.00662294	0.00482894	GAS6/TEK/COL18A1/CCL2/CD40/ICAM1/CDH5/RAMP2/ECSCR	9	geneontology_Biological_Process	0.0125	Up
GO:0050819	negative regulation of coagulation	8/720	55/18866	0.00107788	0.0066293	0.00483358	PRKCD/SH2B3/PDGFB/SERPING1/CD34/APOE/THBD/PLAT	8	geneontology_Biological_Process	0.0111111	Up
GO:0071825	protein-lipid complex subunit organization	8/720	55/18866	0.00107788	0.0066293	0.00483358	ABCG1/GPIHBP1/APOE/APOC1/PLTP/PLA2G5/APOC2/AGT	8	geneontology_Biological_Process	0.0111111	Up
GO:0061387	regulation of extent of cell growth	12/720	111/18866	0.00108563	0.00666824	0.00486197	ARHGAP4/SEMA4A/SEMA3G/TRPV2/APOE/CXCL12/SHTN1/SEMA7A/SPP1/SEMA4B/MAP2/SEMA6D	12	geneontology_Biological_Process	0.0166667	Up
GO:0002369	T cell cytokine production	7/720	43/18866	0.00111323	0.00680224	0.00495968	SASH3/CCR2/IL18/NLRP3/TNFRSF1B/IL1B/SLC11A1	7	geneontology_Biological_Process	0.00972222	Up
GO:0002823	negative regulation of adaptive immune response based on somatic recombination of immune receptors built from immunoglobulin superfamily domains	7/720	43/18866	0.00111323	0.00680224	0.00495968	PARP3/LILRB1/PTPN6/FCGR2B/JAK3/PTPRC/HAVCR2	7	geneontology_Biological_Process	0.00972222	Up
GO:0030517	negative regulation of axon extension	7/720	43/18866	0.00111323	0.00680224	0.00495968	ARHGAP4/SEMA4A/SEMA3G/SEMA7A/SEMA4B/MAP2/SEMA6D	7	geneontology_Biological_Process	0.00972222	Up
GO:0050856	regulation of T cell receptor signaling pathway	7/720	43/18866	0.00111323	0.00680224	0.00495968	PTPN6/LILRB4/LCK/CD300A/PTPRJ/PTPN22/GBP1	7	geneontology_Biological_Process	0.00972222	Up
GO:1901568	fatty acid derivative metabolic process	16/720	175/18866	0.00111626	0.00681192	0.00496673	ALOX5/CD74/PTGS1/HPGDS/ALOX5AP/LTC4S/DPEP2/IL1B/TLR2/ACSL5/PON2/GGT7/PON3/GGT5/GPX1/PLA2G5	16	geneontology_Biological_Process	0.0222222	Up
GO:0009612	response to mechanical stimulus	18/720	209/18866	0.00112868	0.00687881	0.00501551	PTK2B/TLR4/CASP1/IL1B/SHANK3/ENG/TLR5/IRF1/CXCL10/F11R/CD40/TGFBR2/CXCL12/CYBA/BGLAP/MDK/FOS/AGT	18	geneontology_Biological_Process	0.025	Up
GO:0002430	complement receptor mediated signaling pathway	4/720	13/18866	0.00114162	0.00691604	0.00504265	FPR3/FPR1/C3AR1/C5AR1	4	geneontology_Biological_Process	0.00555556	Up
GO:0002921	negative regulation of humoral immune response	4/720	13/18866	0.00114162	0.00691604	0.00504265	VSIG4/PTPN6/FCGR2B/SERPING1	4	geneontology_Biological_Process	0.00555556	Up
GO:0016322	neuron remodeling	4/720	13/18866	0.00114162	0.00691604	0.00504265	C1QA/CX3CL1/SCARF1/C3	4	geneontology_Biological_Process	0.00555556	Up
GO:0045579	positive regulation of B cell differentiation	4/720	13/18866	0.00114162	0.00691604	0.00504265	BTK/INPP5D/NCKAP1L/CD27	4	geneontology_Biological_Process	0.00555556	Up
GO:0019079	viral genome replication	13/720	127/18866	0.00114214	0.00691604	0.00504265	CD209/PARP10/GAS6/ATG16L2/CCL8/CCL2/OAS1/IFITM2/BST2/IFI27/CCL5/SLPI/MX1	13	geneontology_Biological_Process	0.0180556	Up
GO:0034765	regulation of ion transmembrane transport	33/720	489/18866	0.00116561	0.00704909	0.00513966	CORO1A/CCR2/CYBB/P2RY6/CX3CL1/PTAFR/CTSS/PTK2B/PTPN6/APLNR/RAMP3/SLC43A2/TREM2/SHANK3/ACSL5/PLA2G6/TMEM37/GJA5/SNCA/MINK1/CXCL10/CCL2/CACNA2D4/SCN1B/CAPN3/CYBA/TCIRG1/GSTM2/CXCL9/CXCL11/HSPA2/SHANK1/AGT	33	geneontology_Biological_Process	0.0458333	Up
GO:0030516	regulation of axon extension	11/720	97/18866	0.00116748	0.00705135	0.00514131	ARHGAP4/SEMA4A/SEMA3G/TRPV2/APOE/CXCL12/SHTN1/SEMA7A/SEMA4B/MAP2/SEMA6D	11	geneontology_Biological_Process	0.0152778	Up
GO:0002724	regulation of T cell cytokine production	6/720	32/18866	0.0011727	0.00705571	0.00514448	SASH3/CCR2/IL18/NLRP3/TNFRSF1B/IL1B	6	geneontology_Biological_Process	0.00833333	Up
GO:0048841	regulation of axon extension involved in axon guidance	6/720	32/18866	0.0011727	0.00705571	0.00514448	SEMA4A/SEMA3G/CXCL12/SEMA7A/SEMA4B/SEMA6D	6	geneontology_Biological_Process	0.00833333	Up
GO:0071353	cellular response to interleukin-4	6/720	32/18866	0.0011727	0.00705571	0.00514448	CORO1A/CD300LF/JAK3/IL2RG/RUFY4/DCSTAMP	6	geneontology_Biological_Process	0.00833333	Up
GO:0030100	regulation of endocytosis	18/720	210/18866	0.00119175	0.00716118	0.00522138	CD22/LILRB1/CD14/NCKAP1L/ARRB2/CD300A/TREM2/DAB2/SNCA/MCTP1/SCAMP5/RAB4B/APOE/C3/APOC1/APOC2/SFRP4/ITGB3	18	geneontology_Biological_Process	0.025	Up
GO:0016049	cell growth	33/720	490/18866	0.00120569	0.00723566	0.00527569	ARHGAP4/TMC8/PTK2B/SEMA4A/SOX17/S100A9/PTPRJ/ACVRL1/HYAL2/CXCL16/SEMA3G/SGK1/CLSTN3/TRPV2/APOE/TGFBR2/SLIT2/IGFBP7/CXCL12/CYBA/SHTN1/SEMA7A/S100A8/SPP1/EPB41L3/BST2/HYAL1/SEMA4B/MAP2/SEMA6D/DCSTAMP/RASGRP2/AGT	33	geneontology_Biological_Process	0.0458333	Up
GO:0090130	tissue migration	27/720	374/18866	0.001212	0.00726427	0.00529655	PTK2B/TNFSF12/ITGB2/STAT5A/SEMA4A/PLXND1/LPXN/ACVRL1/PDGFB/PTPRM/TEK/PLEKHG5/VASH1/SH3BP1/HMOX1/APOE/CD40/TGFBR2/CDH5/SLIT2/GPX1/GRN/HYAL1/ACTA2/SMOC2/AGT/ITGB3	27	geneontology_Biological_Process	0.0375	Up
GO:1903307	positive regulation of regulated secretory pathway	8/720	56/18866	0.00121621	0.00728025	0.0053082	ITGAM/PTAFR/FGR/ITGB2/VAMP8/FCER1G/UNC13D/SCAMP5	8	geneontology_Biological_Process	0.0111111	Up
GO:0002313	mature B cell differentiation involved in immune response	5/720	22/18866	0.00122388	0.00730754	0.0053281	MFNG/PTK2B/FCGR2B/ITM2A/LFNG	5	geneontology_Biological_Process	0.00694444	Up
GO:0050765	negative regulation of phagocytosis	5/720	22/18866	0.00122388	0.00730754	0.0053281	CD300LF/FCGR2B/CD300A/SIRPA/TLR2	5	geneontology_Biological_Process	0.00694444	Up
GO:0014013	regulation of gliogenesis	13/720	128/18866	0.00122796	0.00732261	0.00533908	CCR2/CX3CL1/TNFRSF1B/TREM2/IL1B/TLR2/CSF1/PRKCH/SLC45A3/CX3CR1/CCL3/LIF/MDK	13	geneontology_Biological_Process	0.0180556	Up
GO:2001233	regulation of apoptotic signaling pathway	29/720	413/18866	0.00124784	0.00743175	0.00541867	RIPK3/CD74/PYCARD/TMC8/PRKCD/CX3CL1/TNFSF12/LCK/ARRB2/PTPRC/S100A9/LGALS9/CFLAR/IL1B/HYAL2/PLA2G6/ZNF385A/HMOX1/ICAM1/CX3CR1/CXCL12/GPX1/S100A8/MEIS3/G0S2/IFI6/TNFSF10/HGF/AGT	29	geneontology_Biological_Process	0.0402778	Up
GO:0032963	collagen metabolic process	12/720	113/18866	0.00126972	0.00755249	0.0055067	CIITA/VSIR/CTSS/ARRB2/COL15A1/ENG/TNS2/CST3/MMP19/CYGB/CCN2/CTSK	12	geneontology_Biological_Process	0.0166667	Up
GO:0001913	T cell mediated cytotoxicity	7/720	44/18866	0.00128092	0.00759992	0.00554128	RIPK3/LILRB1/HLA-E/FCGR2B/PTPRC/CD1D/PRF1	7	geneontology_Biological_Process	0.00972222	Up
GO:1902667	regulation of axon guidance	7/720	44/18866	0.00128092	0.00759992	0.00554128	SEMA4A/SEMA3G/SLIT2/CXCL12/SEMA7A/SEMA4B/SEMA6D	7	geneontology_Biological_Process	0.00972222	Up
GO:0050678	regulation of epithelial cell proliferation	28/720	395/18866	0.00130544	0.00773567	0.00564026	ALOX5/JAML/EGFL7/TLR4/TNFSF12/STAT5A/APLNR/CFLAR/ACVRL1/C5AR1/PDGFB/PTPRM/TEK/VASH1/HMOX1/CCL2/APOE/CXCL12/GPX1/CYBA/F3/GRN/SULF1/HYAL1/ZFP36/CCL5/MDK/ITGB3	28	geneontology_Biological_Process	0.0388889	Up
GO:0032370	positive regulation of lipid transport	9/720	70/18866	0.00132485	0.00783094	0.00570972	PRKCD/ABCG1/IL1B/ACSL5/PLA2G6/TNFRSF11A/APOE/PLTP/SPP1	9	geneontology_Biological_Process	0.0125	Up
GO:0050771	negative regulation of axonogenesis	9/720	70/18866	0.00132485	0.00783094	0.00570972	ARHGAP4/SEMA4A/SEMA3G/SLIT2/SEMA7A/SPP1/SEMA4B/MAP2/SEMA6D	9	geneontology_Biological_Process	0.0125	Up
GO:0051495	positive regulation of cytoskeleton organization	19/720	230/18866	0.00136478	0.00804675	0.00586708	PLEK/WAS/CORO1A/FES/HCLS1/PYCARD/CX3CL1/PTK2B/HCK/NCKAP1L/ARPC1B/RAPGEF3/TEK/FCHSD1/ARHGEF15/GMFG/ICAM1/CCN2/SCIN	19	geneontology_Biological_Process	0.0263889	Up
GO:0097191	extrinsic apoptotic signaling pathway	19/720	230/18866	0.00136478	0.00804675	0.00586708	PYCARD/TMC8/CX3CL1/TNFSF12/PTPRC/TNFRSF1B/CFLAR/IL1B/HYAL2/CD27/HMOX1/ICAM1/GPX1/G0S2/IFI27/IFI6/TNFSF10/HGF/AGT	19	geneontology_Biological_Process	0.0263889	Up
GO:0051817	modulation of process of other organism involved in symbiotic interaction	11/720	99/18866	0.00138148	0.00813502	0.00593144	CD209/CD4/CSF1R/HYAL2/CCL4/CCL8/APOE/CCL3/IFI27/CCL5/PTX3	11	geneontology_Biological_Process	0.0152778	Up
GO:0042542	response to hydrogen peroxide	14/720	146/18866	0.0014175	0.00832854	0.00607254	RIPK3/TRPM2/PRKCD/PTK2B/SIRPA/MAPK13/HBA2/PSAP/HBB/HMOX1/HBA1/CST3/GPX1/HGF	14	geneontology_Biological_Process	0.0194444	Up
GO:0007565	female pregnancy	17/720	196/18866	0.00141789	0.00832854	0.00607254	ARHGDIB/LGALS9/IL1B/HAVCR2/PLA2G6/CST3/TGFBR2/IGFBP7/RAMP2/THBD/SPP1/LIF/FOS/LDOC1/EPYC/AGT/COL16A1	17	geneontology_Biological_Process	0.0236111	Up
GO:0002715	regulation of natural killer cell mediated immunity	7/720	45/18866	0.00146774	0.00858921	0.00626259	VAV1/LILRB1/HLA-E/ARRB2/LGALS9/HAVCR2/LAG3	7	geneontology_Biological_Process	0.00972222	Up
GO:0034122	negative regulation of toll-like receptor signaling pathway	7/720	45/18866	0.00146774	0.00858921	0.00626259	CD300LF/CD14/TLR4/ARRB2/CD300A/LILRA2/LY96	7	geneontology_Biological_Process	0.00972222	Up
GO:0043114	regulation of vascular permeability	7/720	45/18866	0.00146774	0.00858921	0.00626259	PTPRJ/TEK/APOE/CDH5/SLIT2/RAMP2/CLDN5	7	geneontology_Biological_Process	0.00972222	Up
GO:0043523	regulation of neuron apoptotic process	18/720	214/18866	0.0014749	0.00862039	0.00628533	CORO1A/ITGAM/CX3CL1/PTK2B/ARRB2/TYROBP/NAIP/C5AR1/ADAM8/HMOX1/CCL2/APOE/CX3CR1/NRBP2/GRN/CTSZ/CCL3/MDK	18	geneontology_Biological_Process	0.025	Up
GO:0051403	stress-activated MAPK cascade	22/720	286/18866	0.00150845	0.00880551	0.0064203	FGD2/NCF1/PYCARD/PTK2B/TLR4/FCGR2B/CARD9/SIRPA/LGALS9/SH2D3C/IL1B/RASSF2/MAPK13/MINK1/CD27/PTPN22/TNFRSF11A/MAP4K1/ZFP36/CCN2/HGF/AGT	22	geneontology_Biological_Process	0.0305556	Up
GO:0032693	negative regulation of interleukin-10 production	5/720	23/18866	0.00151523	0.0088232	0.0064332	VSIR/LILRB1/FCGR2B/TYROBP/JAK3	5	geneontology_Biological_Process	0.00694444	Up
GO:0050860	negative regulation of T cell receptor signaling pathway	5/720	23/18866	0.00151523	0.0088232	0.0064332	PTPN6/LILRB4/PTPRJ/PTPN22/GBP1	5	geneontology_Biological_Process	0.00694444	Up
GO:0000768	syncytium formation by plasma membrane fusion	8/720	58/18866	0.00153517	0.00889528	0.00648576	CD53/TYROBP/CFLAR/TREM2/RAPGEF3/CXCL10/CXCL9/DCSTAMP	8	geneontology_Biological_Process	0.0111111	Up
GO:0035306	positive regulation of dephosphorylation	8/720	58/18866	0.00153517	0.00889528	0.00648576	RIPK3/PLEK/LILRB2/PRKCD/CD33/PTPRC/CD300A/CDH5	8	geneontology_Biological_Process	0.0111111	Up
GO:0140253	cell-cell fusion	8/720	58/18866	0.00153517	0.00889528	0.00648576	CD53/TYROBP/CFLAR/TREM2/RAPGEF3/CXCL10/CXCL9/DCSTAMP	8	geneontology_Biological_Process	0.0111111	Up
GO:1903793	positive regulation of anion transport	8/720	58/18866	0.00153517	0.00889528	0.00648576	PRKCD/PTAFR/IL1B/ACSL5/PLA2G6/TNFRSF11A/APOE/AGT	8	geneontology_Biological_Process	0.0111111	Up
GO:0001771	immunological synapse formation	4/720	14/18866	0.00155029	0.00892795	0.00650958	DOCK2/DOCK8/HAVCR2/PRF1	4	geneontology_Biological_Process	0.00555556	Up
GO:0010872	regulation of cholesterol esterification	4/720	14/18866	0.00155029	0.00892795	0.00650958	ABCG1/APOE/APOC1/AGT	4	geneontology_Biological_Process	0.00555556	Up
GO:0010935	regulation of macrophage cytokine production	4/720	14/18866	0.00155029	0.00892795	0.00650958	CD74/LILRB1/TLR4/SEMA7A	4	geneontology_Biological_Process	0.00555556	Up
GO:0045591	positive regulation of regulatory T cell differentiation	4/720	14/18866	0.00155029	0.00892795	0.00650958	LILRB2/VSIR/LILRB4/LGALS9	4	geneontology_Biological_Process	0.00555556	Up
GO:0070234	positive regulation of T cell apoptotic process	4/720	14/18866	0.00155029	0.00892795	0.00650958	LGALS9/NFKBID/ADAM8/CCL5	4	geneontology_Biological_Process	0.00555556	Up
GO:0031960	response to corticosteroid	15/720	164/18866	0.00156861	0.00902236	0.00657842	AIF1/CYBB/PTAFR/CFLAR/ENG/ICAM1/SLIT2/IGFBP7/CYBA/MAOB/ZFP36/BGLAP/CCN2/MDK/FOS	15	geneontology_Biological_Process	0.0208333	Up
GO:0008361	regulation of cell size	16/720	181/18866	0.00158936	0.00913058	0.00665732	PLEK/ARHGAP4/VAV1/SEMA4A/SHANK3/SEMA3G/TRPV2/APOE/SLC12A5/CXCL12/SHTN1/SEMA7A/SPP1/SEMA4B/MAP2/SEMA6D	16	geneontology_Biological_Process	0.0222222	Up
GO:0034109	homotypic cell-cell adhesion	10/720	86/18866	0.0015939	0.00913433	0.00666006	PLEK/PRKCD/PTPN6/FERMT3/SH2B3/HBB/F11R/MYL9/CCL5/ITGB3	10	geneontology_Biological_Process	0.0138889	Up
GO:1903901	negative regulation of viral life cycle	10/720	86/18866	0.0015939	0.00913433	0.00666006	FCN1/PARP10/CCL8/OAS1/IFITM2/BST2/CCL5/SLPI/MX1/PTX3	10	geneontology_Biological_Process	0.0138889	Up
GO:0071901	negative regulation of protein serine/threonine kinase activity	14/720	148/18866	0.00161417	0.00923925	0.00673655	PYCARD/PRKCD/PTPN6/CD300A/IL1B/HHEX/PTPRJ/HYAL2/SH2B3/CEBPA/PTPN22/APOE/PKIB/AGT	14	geneontology_Biological_Process	0.0194444	Up
GO:0030838	positive regulation of actin filament polymerization	11/720	101/18866	0.00162664	0.00929256	0.00677543	WAS/CORO1A/PYCARD/PTK2B/HCK/NCKAP1L/ARPC1B/FCHSD1/GMFG/ICAM1/SCIN	11	geneontology_Biological_Process	0.0152778	Up
GO:0002756	MyD88-independent toll-like receptor signaling pathway	6/720	34/18866	0.00163138	0.00929256	0.00677543	CD300LF/CD14/TLR4/LY96/CD40/IRF7	6	geneontology_Biological_Process	0.00833333	Up
GO:0030851	granulocyte differentiation	6/720	34/18866	0.00163138	0.00929256	0.00677543	HCLS1/C1QC/INPP5D/SPI1/EVI2B/CEBPA	6	geneontology_Biological_Process	0.00833333	Up
GO:0050715	positive regulation of cytokine secretion	6/720	34/18866	0.00163138	0.00929256	0.00677543	CD14/FGR/CLEC5A/SCAMP5/CD34/CLEC4E	6	geneontology_Biological_Process	0.00833333	Up
GO:0097305	response to alcohol	19/720	234/18866	0.00166673	0.00948245	0.00691387	CYBB/P2RY6/CD14/PTK2B/SPI1/CCR5/CD27/MAP4K1/TGFBR2/ICAM1/SLIT2/IGFBP7/CYBA/GNG2/MAOB/CCL3/S100A8/BGLAP/FOS	19	geneontology_Biological_Process	0.0263889	Up
GO:0045581	negative regulation of T cell differentiation	7/720	46/18866	0.00167514	0.00951874	0.00694034	FGL2/CD74/JAK3/NFKBID/LAG3/IRF1/MDK	7	geneontology_Biological_Process	0.00972222	Up
GO:0002758	innate immune response-activating signal transduction	12/720	117/18866	0.00171575	0.00971385	0.00708259	CD209/CLEC10A/PRKCD/FCN1/HCK/CARD9/FCER1G/LILRA2/CLEC4E/CLEC4A/PSMB9/MUC15	12	geneontology_Biological_Process	0.0166667	Up
GO:0030282	bone mineralization	12/720	117/18866	0.00171575	0.00971385	0.00708259	ALOX5/CLEC3B/PTK2B/FGR/S1PR1/LTBP3/CCR1/ANKH/CCL3/SRGN/BGLAP/SNX10	12	geneontology_Biological_Process	0.0166667	Up
GO:0006636	unsaturated fatty acid biosynthetic process	8/720	59/18866	0.00171773	0.00971385	0.00708259	ALOX5/CD74/PTGS1/HPGDS/ALOX5AP/LTC4S/IL1B/GSTM2	8	geneontology_Biological_Process	0.0111111	Up
GO:0045454	cell redox homeostasis	8/720	59/18866	0.00171773	0.00971385	0.00708259	NCF4/NCF1/CYBB/NCF2/RAC2/SLC11A1/GPX1/CYBA	8	geneontology_Biological_Process	0.0111111	Up
GO:0043524	negative regulation of neuron apoptotic process	14/720	149/18866	0.00172071	0.00971903	0.00708637	CORO1A/CX3CL1/PTK2B/ARRB2/NAIP/C5AR1/ADAM8/HMOX1/CCL2/APOE/CX3CR1/NRBP2/GRN/MDK	14	geneontology_Biological_Process	0.0194444	Up
GO:0010631	epithelial cell migration	26/720	365/18866	0.00178554	0.0100731	0.00734454	PTK2B/TNFSF12/ITGB2/STAT5A/SEMA4A/PLXND1/LPXN/ACVRL1/PDGFB/PTPRM/TEK/PLEKHG5/VASH1/SH3BP1/HMOX1/APOE/CD40/TGFBR2/CDH5/SLIT2/GPX1/GRN/HYAL1/SMOC2/AGT/ITGB3	26	geneontology_Biological_Process	0.0361111	Up
GO:0007265	Ras protein signal transduction	25/720	346/18866	0.00178774	0.0100734	0.00734477	ARHGAP4/WAS/AIF1/DOK3/RASAL3/RASA4B/DOK2/RASGRP4/VAV1/CYTH4/PSD4/ARHGDIB/CSF1/RAPGEF3/PLEKHG5/SH3BP1/RAC2/RAB4B/RASA4/LAT/F11R/APOE/LPAR6/SHTN1/RASGRP2	25	geneontology_Biological_Process	0.0347222	Up
GO:0034123	positive regulation of toll-like receptor signaling pathway	5/720	24/18866	0.00185453	0.0104373	0.00761007	TLR2/TLR1/TLR5/PTPN22/CYBA	5	geneontology_Biological_Process	0.00694444	Up
GO:0001933	negative regulation of protein phosphorylation	30/720	444/18866	0.00187824	0.0105581	0.00769813	PYCARD/PRKCD/TBC1D10C/PTPN6/TLR4/SAMSN1/ARRB2/PTPRC/CD300A/SIRPA/IL1B/HHEX/PTPRJ/HYAL2/RASSF2/ENG/SH2B3/SNCA/CEBPA/PTPN22/APOE/GMFG/SLIT2/MVP/PKIB/SOCS3/LIF/HGF/AGT/GBP1	30	geneontology_Biological_Process	0.0416667	Up
GO:0038061	NIK/NF-kappaB signaling	16/720	184/18866	0.00188293	0.0105592	0.00769897	RIPK3/IL18/CD14/NLRP3/TLR4/LGALS9/TREM2/IL1B/HAVCR2/TLR2/RASSF2/CD27/PTPN22/CD86/TCIM/PSMB9	16	geneontology_Biological_Process	0.0222222	Up
GO:0046328	regulation of JNK cascade	16/720	184/18866	0.00188293	0.0105592	0.00769897	FGD2/NCF1/PYCARD/PTK2B/TLR4/FCGR2B/CARD9/SIRPA/IL1B/RASSF2/MINK1/CD27/PTPN22/TNFRSF11A/MAP4K1/CCN2	16	geneontology_Biological_Process	0.0222222	Up
GO:0007157	heterophilic cell-cell adhesion via plasma membrane cell adhesion molecules	7/720	47/18866	0.0019046	0.010627	0.00774836	CD209/JAML/ITGAL/IGSF21/AMIGO2/ICAM1/VCAM1	7	geneontology_Biological_Process	0.00972222	Up
GO:0050919	negative chemotaxis	7/720	47/18866	0.0019046	0.010627	0.00774836	SEMA4A/SEMA3G/SLIT2/SEMA7A/SEMA4B/SEMA6D/ITGB3	7	geneontology_Biological_Process	0.00972222	Up
GO:1901570	fatty acid derivative biosynthetic process	11/720	103/18866	0.00190625	0.010627	0.00774836	ALOX5/CD74/PTGS1/HPGDS/ALOX5AP/LTC4S/IL1B/ACSL5/GGT7/GGT5/PLA2G5	11	geneontology_Biological_Process	0.0152778	Up
GO:0001914	regulation of T cell mediated cytotoxicity	6/720	35/18866	0.0019063	0.010627	0.00774836	RIPK3/LILRB1/HLA-E/FCGR2B/PTPRC/CD1D	6	geneontology_Biological_Process	0.00833333	Up
GO:0070670	response to interleukin-4	6/720	35/18866	0.0019063	0.010627	0.00774836	CORO1A/CD300LF/JAK3/IL2RG/RUFY4/DCSTAMP	6	geneontology_Biological_Process	0.00833333	Up
GO:0006949	syncytium formation	8/720	60/18866	0.00191702	0.0106489	0.00776435	CD53/TYROBP/CFLAR/TREM2/RAPGEF3/CXCL10/CXCL9/DCSTAMP	8	geneontology_Biological_Process	0.0111111	Up
GO:0061098	positive regulation of protein tyrosine kinase activity	8/720	60/18866	0.00191702	0.0106489	0.00776435	NCF1/CSF1R/GAS6/FCGR1A/PDGFB/NEDD9/CCL5/AGT	8	geneontology_Biological_Process	0.0111111	Up
GO:0097755	positive regulation of blood vessel diameter	8/720	60/18866	0.00191702	0.0106489	0.00776435	PTAFR/PLA2G6/GJA5/PTPRM/HMOX1/APOE/GPX1/AGT	8	geneontology_Biological_Process	0.0111111	Up
GO:0050769	positive regulation of neurogenesis	32/720	485/18866	0.00196713	0.0109143	0.00795788	CCR2/FES/CX3CL1/PTK2B/S100A9/TNFRSF1B/PLXND1/SCARF1/CFLAR/TREM2/IL1B/SHANK3/TLR2/CSF1/PRKCH/GDPD5/TRPV2/APOE/SCN1B/CX3CR1/SLIT2/CXCL12/SHTN1/NDRG4/GRN/SEMA7A/CCL3/LIF/MDK/HGF/SHANK1/AGT	32	geneontology_Biological_Process	0.0444444	Up
GO:0032368	regulation of lipid transport	13/720	135/18866	0.00199174	0.0110378	0.00804794	PRKCD/ABCG1/IL1B/ACSL5/PLA2G6/TNFRSF11A/APOE/APOC1/PLTP/SPP1/APOC2/AGT/ITGB3	13	geneontology_Biological_Process	0.0180556	Up
GO:0090132	epithelium migration	26/720	368/18866	0.00200005	0.0110709	0.00807204	PTK2B/TNFSF12/ITGB2/STAT5A/SEMA4A/PLXND1/LPXN/ACVRL1/PDGFB/PTPRM/TEK/PLEKHG5/VASH1/SH3BP1/HMOX1/APOE/CD40/TGFBR2/CDH5/SLIT2/GPX1/GRN/HYAL1/SMOC2/AGT/ITGB3	26	geneontology_Biological_Process	0.0361111	Up
GO:0001845	phagolysosome assembly	4/720	15/18866	0.00205067	0.0112061	0.00817061	CORO1A/MYO7A/RAB20/PLA2G5	4	geneontology_Biological_Process	0.00555556	Up
GO:0002281	macrophage activation involved in immune response	4/720	15/18866	0.00205067	0.0112061	0.00817061	TYROBP/TREM2/HAVCR2/GRN	4	geneontology_Biological_Process	0.00555556	Up
GO:0030852	regulation of granulocyte differentiation	4/720	15/18866	0.00205067	0.0112061	0.00817061	HCLS1/C1QC/INPP5D/EVI2B	4	geneontology_Biological_Process	0.00555556	Up
GO:0034134	toll-like receptor 2 signaling pathway	4/720	15/18866	0.00205067	0.0112061	0.00817061	PIK3AP1/TLR2/TLR1/CYBA	4	geneontology_Biological_Process	0.00555556	Up
GO:0034349	glial cell apoptotic process	4/720	15/18866	0.00205067	0.0112061	0.00817061	PRKCD/GAS6/PRKCH/CCL2	4	geneontology_Biological_Process	0.00555556	Up
GO:0042976	activation of Janus kinase activity	4/720	15/18866	0.00205067	0.0112061	0.00817061	PTK2B/CD300A/CCL5/AGT	4	geneontology_Biological_Process	0.00555556	Up
GO:0045064	T-helper 2 cell differentiation	4/720	15/18866	0.00205067	0.0112061	0.00817061	IL18/NLRP3/CD86/BATF	4	geneontology_Biological_Process	0.00555556	Up
GO:0051044	positive regulation of membrane protein ectodomain proteolysis	4/720	15/18866	0.00205067	0.0112061	0.00817061	TNFRSF1B/IL1B/ADAM8/APOE	4	geneontology_Biological_Process	0.00555556	Up
GO:0060099	regulation of phagocytosis, engulfment	4/720	15/18866	0.00205067	0.0112061	0.00817061	NCKAP1L/CD300A/TREM2/C3	4	geneontology_Biological_Process	0.00555556	Up
GO:1901550	regulation of endothelial cell development	4/720	15/18866	0.00205067	0.0112061	0.00817061	IL1B/F11R/CDH5/CLDN5	4	geneontology_Biological_Process	0.00555556	Up
GO:1903140	regulation of establishment of endothelial barrier	4/720	15/18866	0.00205067	0.0112061	0.00817061	IL1B/F11R/CDH5/CLDN5	4	geneontology_Biological_Process	0.00555556	Up
GO:0007200	phospholipase C-activating G protein-coupled receptor signaling pathway	11/720	104/18866	0.00206004	0.0112442	0.00819842	P2RY6/FPR3/FPR1/C3AR1/GNA15/C5AR1/LPAR6/S1PR1/CX3CR1/TGM2/AGT	11	geneontology_Biological_Process	0.0152778	Up
GO:0007260	tyrosine phosphorylation of STAT protein	10/720	89/18866	0.00206718	0.0112701	0.00821727	HCLS1/IL18/CSF1R/JAK3/OSM/SH2B3/CD40/SOCS3/LIF/CCL5	10	geneontology_Biological_Process	0.0138889	Up
GO:0032147	activation of protein kinase activity	24/720	331/18866	0.00208798	0.0113703	0.00829035	RIPK3/CD74/PRKCD/IL18/PTK2B/TLR4/FPR1/NCKAP1L/PTPRC/CD300A/ADCY4/IL1B/GAS6/C5AR1/PDGFB/MINK1/MAP4K1/CD86/TGFBR2/SLC11A1/CCL5/HGF/AGT/ITGB3	24	geneontology_Biological_Process	0.0333333	Up
GO:0061025	membrane fusion	15/720	169/18866	0.00210945	0.011474	0.00836593	CORO1A/CD4/FOLR2/VAMP8/CCR5/GAS6/HYAL2/RUBCNL/SNCA/GCA/RAB20/TIE1/PLA2G5/MX1/DCSTAMP	15	geneontology_Biological_Process	0.0208333	Up
GO:0045071	negative regulation of viral genome replication	8/720	61/18866	0.0021341	0.0115946	0.00845391	PARP10/CCL8/OAS1/IFITM2/BST2/CCL5/SLPI/MX1	8	geneontology_Biological_Process	0.0111111	Up
GO:0014911	positive regulation of smooth muscle cell migration	7/720	48/18866	0.00215769	0.0116823	0.00851784	AIF1/P2RY6/PDGFB/CCL5/MDK/SEMA6D/AGT	7	geneontology_Biological_Process	0.00972222	Up
GO:0045601	regulation of endothelial cell differentiation	7/720	48/18866	0.00215769	0.0116823	0.00851784	IL1B/ACVRL1/NOTCH4/F11R/JAG1/CDH5/CLDN5	7	geneontology_Biological_Process	0.00972222	Up
GO:0090382	phagosome maturation	7/720	48/18866	0.00215769	0.0116823	0.00851784	CORO1A/MYO7A/SLAMF8/RAB20/PLA2G5/TCIRG1/ATP6V0D2	7	geneontology_Biological_Process	0.00972222	Up
GO:0071559	response to transforming growth factor beta	20/720	258/18866	0.00221163	0.0119606	0.00872076	CLEC3B/NRROS/ARRB2/CFLAR/LPXN/ACVRL1/HYAL2/ENG/ZYX/DAB2/LTBP2/F11R/TGFBR2/CDH5/CX3CR1/LTBP3/COL4A2/FNDC4/CLDN5/FOS	20	geneontology_Biological_Process	0.0277778	Up
GO:0071402	cellular response to lipoprotein particle stimulus	6/720	36/18866	0.00221488	0.0119644	0.00872354	TLR4/ITGB2/ABCG1/FCER1G/CD68/APOE	6	geneontology_Biological_Process	0.00833333	Up
GO:0043409	negative regulation of MAPK cascade	16/720	187/18866	0.00222056	0.0119813	0.00873588	PRKCD/TBC1D10C/PTPN6/TLR4/PTPRC/CD300A/SIRPA/IL1B/PTPRJ/HYAL2/SH2B3/PTPN22/APOE/LIF/AGT/GBP1	16	geneontology_Biological_Process	0.0222222	Up
GO:0044070	regulation of anion transport	11/720	105/18866	0.00222377	0.0119849	0.00873851	PRKCD/PTAFR/SLC43A2/IL1B/ACSL5/PLA2G6/TNFRSF11A/APOE/GABRE/SFRP4/AGT	11	geneontology_Biological_Process	0.0152778	Up
GO:0003071	renal system process involved in regulation of systemic arterial blood pressure	5/720	25/18866	0.00224625	0.0120784	0.00880664	GAS6/PDGFB/GJA5/CYBA/AGT	5	geneontology_Biological_Process	0.00694444	Up
GO:0032878	regulation of establishment or maintenance of cell polarity	5/720	25/18866	0.00224625	0.0120784	0.00880664	DOCK8/PTK2B/TEK/CDH5/SHTN1	5	geneontology_Biological_Process	0.00694444	Up
GO:0051348	negative regulation of transferase activity	22/720	296/18866	0.00231919	0.0124564	0.00908224	PYCARD/PARP3/PRKCD/PTPN6/PTPRC/CD300A/IL1B/HHEX/PTPRJ/HYAL2/SH2B3/SNCA/PIK3IP1/CEBPA/PTPN22/APOE/GMFG/MVP/PKIB/SOCS3/ZFP36/AGT	22	geneontology_Biological_Process	0.0305556	Up
GO:0002262	myeloid cell homeostasis	14/720	154/18866	0.002345	0.0125806	0.00917284	CCR2/HCLS1/IKZF1/INPP5D/NCKAP1L/JAK3/SPI1/FCER1G/SH2B3/MERTK/HMOX1/RHEX/EPAS1/ZFP36	14	geneontology_Biological_Process	0.0194444	Up
GO:1905952	regulation of lipid localization	15/720	171/18866	0.00236534	0.0126716	0.00923915	PRKCD/ABCG1/IL1B/MSR1/ACSL5/PLA2G6/TNFRSF11A/APOE/C3/APOC1/PLTP/SPP1/APOC2/AGT/ITGB3	15	geneontology_Biological_Process	0.0208333	Up
GO:0002294	CD4-positive, alpha-beta T cell differentiation involved in immune response	8/720	62/18866	0.00237003	0.0126716	0.00923915	IL18/NLRP3/SEMA4A/JAK3/LGALS9/NFKBID/CD86/BATF	8	geneontology_Biological_Process	0.0111111	Up
GO:0051851	modulation by host of symbiont process	8/720	62/18866	0.00237003	0.0126716	0.00923915	CSF1R/CCL4/CCL8/APOE/CCL3/IFI27/CCL5/PTX3	8	geneontology_Biological_Process	0.0111111	Up
GO:0014812	muscle cell migration	11/720	106/18866	0.0023979	0.012806	0.00933719	AIF1/P2RY6/PDGFB/SLIT2/NDRG4/PLAT/CCL5/MDK/SEMA6D/AGT/ITGB3	11	geneontology_Biological_Process	0.0152778	Up
GO:0098754	detoxification	13/720	138/18866	0.0024216	0.012918	0.00941879	PTGS1/ALOX5AP/LTC4S/S100A9/HBA2/HBB/HBA1/APOE/GPX1/CYGB/GSTM2/HBG2/GPX3	13	geneontology_Biological_Process	0.0180556	Up
GO:0002686	negative regulation of leukocyte migration	7/720	49/18866	0.00243597	0.0129652	0.00945321	SLAMF8/CD300A/HMOX1/CCL2/SLIT2/CXCL12/CD200	7	geneontology_Biological_Process	0.00972222	Up
GO:0010712	regulation of collagen metabolic process	7/720	49/18866	0.00243597	0.0129652	0.00945321	CIITA/VSIR/ARRB2/ENG/CST3/CYGB/CCN2	7	geneontology_Biological_Process	0.00972222	Up
GO:0045921	positive regulation of exocytosis	10/720	91/18866	0.00244123	0.0129785	0.00946294	ITGAM/PTAFR/FGR/ITGB2/VAMP8/FCER1G/PLA2G6/UNC13D/SNCA/SCAMP5	10	geneontology_Biological_Process	0.0138889	Up
GO:0021782	glial cell development	12/720	122/18866	0.00244671	0.012993	0.00947349	C1QA/HDAC10/NRROS/TLR4/S100A9/TREM2/IL1B/TLR2/C5AR1/GRN/S100A8/MDK	12	geneontology_Biological_Process	0.0166667	Up
GO:1901343	negative regulation of vasculature development	17/720	207/18866	0.00253581	0.0134368	0.00979708	ALOX5/CCR2/STAB1/SEMA4A/HHEX/PDGFB/PTPRM/TEK/VASH1/CXCL10/CX3CR1/TIE1/COL4A2/SULF1/ECSCR/CLDN5/AGT	17	geneontology_Biological_Process	0.0236111	Up
GO:0050673	epithelial cell proliferation	30/720	453/18866	0.002536	0.0134368	0.00979708	ALOX5/JAML/EGFL7/TLR4/TNFSF12/STAT5A/APLNR/CFLAR/ACVRL1/C5AR1/PDGFB/PTPRM/TEK/VASH1/CD34/HMOX1/CCL2/APOE/CXCL12/GPX1/CYBA/F3/GRN/SULF1/HYAL1/ZFP36/CCL5/MDK/HGF/ITGB3	30	geneontology_Biological_Process	0.0416667	Up
GO:0030500	regulation of bone mineralization	9/720	77/18866	0.00259621	0.0137404	0.0100184	ALOX5/PTK2B/S1PR1/LTBP3/CCR1/ANKH/CCL3/SRGN/BGLAP	9	geneontology_Biological_Process	0.0125	Up
GO:0003018	vascular process in circulatory system	16/720	190/18866	0.0026072	0.013783	0.0100495	PTAFR/PTPRJ/PLA2G6/GJA5/PTPRM/TEK/HMOX1/APOE/ICAM1/CDH5/SLIT2/RAMP2/GPX1/ACTA2/CLDN5/AGT	16	geneontology_Biological_Process	0.0222222	Up
GO:0048675	axon extension	12/720	123/18866	0.00261963	0.0138332	0.0100861	ARHGAP4/SEMA4A/SEMA3G/TRPV2/APOE/SLIT2/CXCL12/SHTN1/SEMA7A/SEMA4B/MAP2/SEMA6D	12	geneontology_Biological_Process	0.0166667	Up
GO:0002287	alpha-beta T cell activation involved in immune response	8/720	63/18866	0.00262592	0.0138353	0.0100877	IL18/NLRP3/SEMA4A/JAK3/LGALS9/NFKBID/CD86/BATF	8	geneontology_Biological_Process	0.0111111	Up
GO:0002293	alpha-beta T cell differentiation involved in immune response	8/720	63/18866	0.00262592	0.0138353	0.0100877	IL18/NLRP3/SEMA4A/JAK3/LGALS9/NFKBID/CD86/BATF	8	geneontology_Biological_Process	0.0111111	Up
GO:0061448	connective tissue development	20/720	262/18866	0.00264333	0.0138507	0.0100989	CFLAR/ACVRL1/HYAL2/CSF1/PDGFB/CD34/TGFBR2/LTBP3/HOXA3/SULF1/HYAL1/ACTA2/MATN3/CCN2/MDK/EPYC/BMP8B/EGR1/SCIN/CTSK	20	geneontology_Biological_Process	0.0277778	Up
GO:0001977	renal system process involved in regulation of blood volume	4/720	16/18866	0.00265239	0.0138507	0.0100989	GAS6/PDGFB/GJA5/CYBA	4	geneontology_Biological_Process	0.00555556	Up
GO:0002830	positive regulation of type 2 immune response	4/720	16/18866	0.00265239	0.0138507	0.0100989	CD74/IL18/NLRP3/CD86	4	geneontology_Biological_Process	0.00555556	Up
GO:0032604	granulocyte macrophage colony-stimulating factor production	4/720	16/18866	0.00265239	0.0138507	0.0100989	IL18/IL1B/LILRA2/CD84	4	geneontology_Biological_Process	0.00555556	Up
GO:0034374	low-density lipoprotein particle remodeling	4/720	16/18866	0.00265239	0.0138507	0.0100989	ABCG1/APOE/PLA2G5/AGT	4	geneontology_Biological_Process	0.00555556	Up
GO:0043116	negative regulation of vascular permeability	4/720	16/18866	0.00265239	0.0138507	0.0100989	PTPRJ/SLIT2/RAMP2/CLDN5	4	geneontology_Biological_Process	0.00555556	Up
GO:0045342	MHC class II biosynthetic process	4/720	16/18866	0.00265239	0.0138507	0.0100989	CIITA/TLR4/SPI1/SLC11A1	4	geneontology_Biological_Process	0.00555556	Up
GO:1905153	regulation of membrane invagination	4/720	16/18866	0.00265239	0.0138507	0.0100989	NCKAP1L/CD300A/TREM2/C3	4	geneontology_Biological_Process	0.00555556	Up
GO:0044706	multi-multicellular organism process	18/720	226/18866	0.00268773	0.0139949	0.010204	PTAFR/ARHGDIB/LGALS9/IL1B/HAVCR2/PLA2G6/CST3/TGFBR2/IGFBP7/RAMP2/THBD/SPP1/LIF/FOS/LDOC1/EPYC/AGT/COL16A1	18	geneontology_Biological_Process	0.025	Up
GO:0003081	regulation of systemic arterial blood pressure by renin-angiotensin	5/720	26/18866	0.00269488	0.0139949	0.010204	CPA3/GJA5/CYBA/CTSZ/AGT	5	geneontology_Biological_Process	0.00694444	Up
GO:0031664	regulation of lipopolysaccharide-mediated signaling pathway	5/720	26/18866	0.00269488	0.0139949	0.010204	LY86/CX3CL1/SIGIRR/LILRA2/LY96	5	geneontology_Biological_Process	0.00694444	Up
GO:0048843	negative regulation of axon extension involved in axon guidance	5/720	26/18866	0.00269488	0.0139949	0.010204	SEMA4A/SEMA3G/SEMA7A/SEMA4B/SEMA6D	5	geneontology_Biological_Process	0.00694444	Up
GO:0060074	synapse maturation	5/720	26/18866	0.00269488	0.0139949	0.010204	IGSF21/ARHGEF15/CX3CR1/SYBU/SHANK1	5	geneontology_Biological_Process	0.00694444	Up
GO:0031098	stress-activated protein kinase signaling cascade	22/720	300/18866	0.00273389	0.0141722	0.0103333	FGD2/NCF1/PYCARD/PTK2B/TLR4/FCGR2B/CARD9/SIRPA/LGALS9/SH2D3C/IL1B/RASSF2/MAPK13/MINK1/CD27/PTPN22/TNFRSF11A/MAP4K1/ZFP36/CCN2/HGF/AGT	22	geneontology_Biological_Process	0.0305556	Up
GO:0002711	positive regulation of T cell mediated immunity	7/720	50/18866	0.00274106	0.0141722	0.0103333	SASH3/IL18/HLA-E/NLRP3/PTPRC/IL1B/CD1D	7	geneontology_Biological_Process	0.00972222	Up
GO:0014009	glial cell proliferation	7/720	50/18866	0.00274106	0.0141722	0.0103333	CX3CL1/PTK2B/CSF1R/TREM2/IL1B/CSF1/PRKCH	7	geneontology_Biological_Process	0.00972222	Up
GO:1903727	positive regulation of phospholipid metabolic process	7/720	50/18866	0.00274106	0.0141722	0.0103333	PRKCD/PTK2B/FGR/TAZ/PDGFB/TEK/APOC2	7	geneontology_Biological_Process	0.00972222	Up
GO:0051402	neuron apoptotic process	19/720	245/18866	0.0028027	0.014475	0.010554	CORO1A/ITGAM/CX3CL1/PTK2B/ARRB2/TYROBP/NAIP/C5AR1/ADAM8/HMOX1/CCL2/APOE/CX3CR1/NRBP2/GRN/CTSZ/NLRP1/CCL3/MDK	19	geneontology_Biological_Process	0.0263889	Up
GO:0061045	negative regulation of wound healing	9/720	78/18866	0.00283784	0.0146404	0.0106747	ALOX5/PRKCD/SH2B3/PDGFB/SERPING1/CD34/APOE/THBD/PLAT	9	geneontology_Biological_Process	0.0125	Up
GO:0032088	negative regulation of NF-kappaB transcription factor activity	10/720	93/18866	0.0028677	0.014746	0.0107516	PYCARD/NLRP3/ADORA3/ARRB2/PARP10/NFKBID/HAVCR2/TMIGD3/NLRC5/CD200	10	geneontology_Biological_Process	0.0138889	Up
GO:0051702	interaction with symbiont	10/720	93/18866	0.0028677	0.014746	0.0107516	CSF1R/CCL4/CCL8/APOE/GPX1/APOL1/CCL3/IFI27/CCL5/PTX3	10	geneontology_Biological_Process	0.0138889	Up
GO:2000117	negative regulation of cysteine-type endopeptidase activity	10/720	93/18866	0.0028677	0.014746	0.0107516	ARRB2/CFLAR/GAS6/NAIP/SNCA/CD27/GPX1/CST7/IFI6/HGF	10	geneontology_Biological_Process	0.0138889	Up
GO:0016525	negative regulation of angiogenesis	16/720	192/18866	0.00289479	0.014869	0.0108413	ALOX5/CCR2/STAB1/SEMA4A/HHEX/PTPRM/TEK/VASH1/CXCL10/CX3CR1/TIE1/COL4A2/SULF1/ECSCR/CLDN5/AGT	16	geneontology_Biological_Process	0.0222222	Up
GO:0006958	complement activation, classical pathway	13/720	141/18866	0.00292476	0.0150065	0.0109416	C1QA/C1QB/CFI/C1QC/SERPING1/C1RL/IGLL5/C3/C4B/C2/C4A/C1R/C1S	13	geneontology_Biological_Process	0.0180556	Up
GO:0006469	negative regulation of protein kinase activity	19/720	246/18866	0.0029322	0.0150283	0.0109575	PYCARD/PRKCD/PTPN6/PTPRC/CD300A/IL1B/HHEX/PTPRJ/HYAL2/SH2B3/SNCA/CEBPA/PTPN22/APOE/GMFG/MVP/PKIB/SOCS3/AGT	19	geneontology_Biological_Process	0.0263889	Up
GO:0043029	T cell homeostasis	6/720	38/18866	0.00294315	0.015068	0.0109865	RIPK3/CORO1A/NCKAP1L/JAK3/LGALS9/TCIRG1	6	geneontology_Biological_Process	0.00833333	Up
GO:0062197	cellular response to chemical stress	25/720	360/18866	0.00303306	0.0155115	0.0113098	RIPK3/ALOX5/TRPM2/NCF4/BTK/NCF1/AIF1/CYBB/PRKCD/TLR4/SIRPA/CFLAR/NCF2/MAPK13/SNCA/PSAP/HMOX1/CST3/CAPN3/EPAS1/GPX1/CYBA/HGF/FOS/GPX3	25	geneontology_Biological_Process	0.0347222	Up
GO:0043393	regulation of protein binding	17/720	211/18866	0.00309225	0.015797	0.011518	MFNG/TMC8/PRKCD/ARRB2/PLXND1/DAB2/PDGFB/APOE/HOXA3/RAMP2/ATP2A3/CTSZ/LFNG/MAP2/SLPI/CLDN5/LDOC1	17	geneontology_Biological_Process	0.0236111	Up
GO:0032272	negative regulation of protein polymerization	9/720	79/18866	0.00309689	0.0158035	0.0115227	PRKCD/TRIOBP/CAPG/SNCA/KANK3/CDH5/SLIT2/MAP2/SCIN	9	geneontology_Biological_Process	0.0125	Up
GO:0043405	regulation of MAP kinase activity	24/720	342/18866	0.0031836	0.0162284	0.0118325	FGD2/CD74/PRKCD/PTK2B/PTPN6/TLR4/PIK3R5/FPR1/PTPRC/CD300A/IL1B/PTPRJ/HYAL2/C5AR1/SH2B3/PDGFB/ADAM8/PTPN22/TNFRSF11A/MAP4K1/APOE/CD40/HGF/AGT	24	geneontology_Biological_Process	0.0333333	Up
GO:0031646	positive regulation of nervous system process	8/720	65/18866	0.0032021	0.0163006	0.0118852	PTAFR/PTK2B/ITGAX/TNFRSF1B/SHANK3/CST7/HGF/SHANK1	8	geneontology_Biological_Process	0.0111111	Up
GO:0048143	astrocyte activation	5/720	27/18866	0.00320495	0.0163006	0.0118852	C1QA/TREM2/IL1B/C5AR1/GRN	5	geneontology_Biological_Process	0.00694444	Up
GO:2000181	negative regulation of blood vessel morphogenesis	16/720	194/18866	0.00320816	0.0163006	0.0118852	ALOX5/CCR2/STAB1/SEMA4A/HHEX/PTPRM/TEK/VASH1/CXCL10/CX3CR1/TIE1/COL4A2/SULF1/ECSCR/CLDN5/AGT	16	geneontology_Biological_Process	0.0222222	Up
GO:0045638	negative regulation of myeloid cell differentiation	10/720	95/18866	0.00335166	0.0169482	0.0123573	C1QC/LILRB1/INPP5D/PTK2B/TLR4/LILRB4/GPR68/GPR137B/CCL3/ZFP36	10	geneontology_Biological_Process	0.0138889	Up
GO:0070167	regulation of biomineral tissue development	10/720	95/18866	0.00335166	0.0169482	0.0123573	ALOX5/PTK2B/GAS6/S1PR1/LTBP3/CCR1/ANKH/CCL3/SRGN/BGLAP	10	geneontology_Biological_Process	0.0138889	Up
GO:0110149	regulation of biomineralization	10/720	95/18866	0.00335166	0.0169482	0.0123573	ALOX5/PTK2B/GAS6/S1PR1/LTBP3/CCR1/ANKH/CCL3/SRGN/BGLAP	10	geneontology_Biological_Process	0.0138889	Up
GO:0002643	regulation of tolerance induction	4/720	17/18866	0.00336484	0.0169482	0.0123573	LILRB2/CD3E/HAVCR2/TGFBR2	4	geneontology_Biological_Process	0.00555556	Up
GO:0006957	complement activation, alternative pathway	4/720	17/18866	0.00336484	0.0169482	0.0123573	VSIG4/C3/CFB/CFH	4	geneontology_Biological_Process	0.00555556	Up
GO:0032695	negative regulation of interleukin-12 production	4/720	17/18866	0.00336484	0.0169482	0.0123573	LILRB1/ARRB2/JAK3/ACP5	4	geneontology_Biological_Process	0.00555556	Up
GO:0033631	cell-cell adhesion mediated by integrin	4/720	17/18866	0.00336484	0.0169482	0.0123573	CD3E/FERMT3/PODXL/CCL5	4	geneontology_Biological_Process	0.00555556	Up
GO:0070293	renal absorption	4/720	17/18866	0.00336484	0.0169482	0.0123573	GAS6/HYAL2/SGK1/HBB	4	geneontology_Biological_Process	0.00555556	Up
GO:0042092	type 2 immune response	6/720	39/18866	0.00336802	0.0169482	0.0123573	CCR2/CD74/IL18/NLRP3/CD86/BATF	6	geneontology_Biological_Process	0.00833333	Up
GO:0007254	JNK cascade	17/720	213/18866	0.00340634	0.0171227	0.0124846	FGD2/NCF1/PYCARD/PTK2B/TLR4/FCGR2B/CARD9/SIRPA/SH2D3C/IL1B/RASSF2/MINK1/CD27/PTPN22/TNFRSF11A/MAP4K1/CCN2	17	geneontology_Biological_Process	0.0236111	Up
GO:0033673	negative regulation of kinase activity	20/720	268/18866	0.00342223	0.0171842	0.0125294	PYCARD/PRKCD/PTPN6/PTPRC/CD300A/IL1B/HHEX/PTPRJ/HYAL2/SH2B3/SNCA/PIK3IP1/CEBPA/PTPN22/APOE/GMFG/MVP/PKIB/SOCS3/AGT	20	geneontology_Biological_Process	0.0277778	Up
GO:0001912	positive regulation of leukocyte mediated cytotoxicity	7/720	52/18866	0.00343832	0.0172099	0.0125481	ITGAM/VAV1/HLA-E/TYROBP/PTPRC/CD1D/LAG3	7	geneontology_Biological_Process	0.00972222	Up
GO:0038066	p38MAPK cascade	7/720	52/18866	0.00343832	0.0172099	0.0125481	NCF1/LGALS9/IL1B/MINK1/PTPN22/ZFP36/HGF	7	geneontology_Biological_Process	0.00972222	Up
GO:2001238	positive regulation of extrinsic apoptotic signaling pathway	7/720	52/18866	0.00343832	0.0172099	0.0125481	PYCARD/TNFSF12/PTPRC/HYAL2/G0S2/TNFSF10/AGT	7	geneontology_Biological_Process	0.00972222	Up
GO:0042326	negative regulation of phosphorylation	31/720	484/18866	0.00357744	0.0178872	0.013042	PYCARD/PRKCD/TBC1D10C/PTPN6/TLR4/SAMSN1/ARRB2/PTPRC/CD300A/SIRPA/IL1B/HHEX/PTPRJ/HYAL2/RASSF2/ENG/SH2B3/SNCA/PIK3IP1/CEBPA/PTPN22/APOE/GMFG/SLIT2/MVP/PKIB/SOCS3/LIF/HGF/AGT/GBP1	31	geneontology_Biological_Process	0.0430556	Up
GO:0050829	defense response to Gram-negative bacterium	9/720	81/18866	0.0036707	0.018334	0.0133678	MPEG1/LYZ/PYCARD/CD4/TLR4/RNASE6/TNFRSF14/GSDMD/SLC11A1	9	geneontology_Biological_Process	0.0125	Up
GO:0006929	substrate-dependent cell migration	5/720	28/18866	0.00378102	0.0187655	0.0136824	PTPRC/ADAM8/SLIT2/SHTN1/ITGA11	5	geneontology_Biological_Process	0.00694444	Up
GO:0010575	positive regulation of vascular endothelial growth factor production	5/720	28/18866	0.00378102	0.0187655	0.0136824	C3AR1/IL1B/C5AR1/C3/SULF1	5	geneontology_Biological_Process	0.00694444	Up
GO:0030194	positive regulation of blood coagulation	5/720	28/18866	0.00378102	0.0187655	0.0136824	PLEK/TLR4/F11R/THBD/F3	5	geneontology_Biological_Process	0.00694444	Up
GO:0032958	inositol phosphate biosynthetic process	5/720	28/18866	0.00378102	0.0187655	0.0136824	PLEK/P2RY6/PTAFR/PTK2B/SNCA	5	geneontology_Biological_Process	0.00694444	Up
GO:1900048	positive regulation of hemostasis	5/720	28/18866	0.00378102	0.0187655	0.0136824	PLEK/TLR4/F11R/THBD/F3	5	geneontology_Biological_Process	0.00694444	Up
GO:1902932	positive regulation of alcohol biosynthetic process	5/720	28/18866	0.00378102	0.0187655	0.0136824	P2RY6/PTAFR/ABCG1/IL1B/SNCA	5	geneontology_Biological_Process	0.00694444	Up
GO:0071560	cellular response to transforming growth factor beta stimulus	19/720	252/18866	0.00381866	0.0189323	0.013804	CLEC3B/NRROS/ARRB2/CFLAR/LPXN/ACVRL1/HYAL2/ENG/ZYX/DAB2/LTBP2/F11R/TGFBR2/CDH5/CX3CR1/LTBP3/COL4A2/CLDN5/FOS	19	geneontology_Biological_Process	0.0263889	Up
GO:0046636	negative regulation of alpha-beta T cell activation	6/720	40/18866	0.0038369	0.0190027	0.0138553	VSIR/LILRB1/JAK3/CD300A/LGALS9/TNFRSF14	6	geneontology_Biological_Process	0.00833333	Up
GO:1900015	regulation of cytokine production involved in inflammatory response	8/720	67/18866	0.00387195	0.0191562	0.0139672	ALOX5/PYCARD/GPSM3/CLEC7A/TLR4/IL17RA/SIRPA/PLD4	8	geneontology_Biological_Process	0.0111111	Up
GO:0010976	positive regulation of neuron projection development	21/720	290/18866	0.00390372	0.019293	0.014067	FES/CX3CL1/PTK2B/S100A9/PLXND1/SCARF1/CFLAR/SHANK3/TRPV2/APOE/SCN1B/SLIT2/CXCL12/SHTN1/NDRG4/GRN/SEMA7A/MDK/HGF/SHANK1/AGT	21	geneontology_Biological_Process	0.0291667	Up
GO:1903510	mucopolysaccharide metabolic process	11/720	113/18866	0.00394924	0.0194975	0.0142161	IL1B/HYAL2/IDUA/PDGFB/ITIH4/CHST1/LYVE1/HYAL1/HGF/VCAN/EGFLAM	11	geneontology_Biological_Process	0.0152778	Up
GO:0045861	negative regulation of proteolysis	25/720	369/18866	0.00417118	0.020506	0.0149514	ARRB2/SERPINA1/CFLAR/GAS6/NAIP/SPINT2/RENBP/CSTA/SERPING1/SNCA/CD27/CST3/ITIH4/C3/C4B/GPX1/CTSZ/C4A/BST2/CST7/PLAT/IFI6/SLPI/HGF/AGT	25	geneontology_Biological_Process	0.0347222	Up
GO:0007043	cell-cell junction assembly	13/720	147/18866	0.00418716	0.020506	0.0149514	GJA4/IL1B/ARVCF/MICALL2/PRKCH/GJA5/ESAM/F11R/CDH5/RAMP2/EPB41L3/CLDN5/AGT	13	geneontology_Biological_Process	0.0180556	Up
GO:0010771	negative regulation of cell morphogenesis involved in differentiation	10/720	98/18866	0.00419695	0.020506	0.0149514	ARHGAP4/SEMA4A/SEMA3G/SLIT2/SEMA7A/SPP1/SEMA4B/MAP2/SEMA6D/GBP1	10	geneontology_Biological_Process	0.0138889	Up
GO:0033194	response to hydroperoxide	4/720	18/18866	0.00419709	0.020506	0.0149514	AIF1/PRKCD/GPX1/GPX3	4	geneontology_Biological_Process	0.00555556	Up
GO:0034433	steroid esterification	4/720	18/18866	0.00419709	0.020506	0.0149514	ABCG1/APOE/APOC1/AGT	4	geneontology_Biological_Process	0.00555556	Up
GO:0034434	sterol esterification	4/720	18/18866	0.00419709	0.020506	0.0149514	ABCG1/APOE/APOC1/AGT	4	geneontology_Biological_Process	0.00555556	Up
GO:0034435	cholesterol esterification	4/720	18/18866	0.00419709	0.020506	0.0149514	ABCG1/APOE/APOC1/AGT	4	geneontology_Biological_Process	0.00555556	Up
GO:0036035	osteoclast development	4/720	18/18866	0.00419709	0.020506	0.0149514	LILRB1/TYROBP/GPR68/SIGLEC15	4	geneontology_Biological_Process	0.00555556	Up
GO:0070230	positive regulation of lymphocyte apoptotic process	4/720	18/18866	0.00419709	0.020506	0.0149514	LGALS9/NFKBID/ADAM8/CCL5	4	geneontology_Biological_Process	0.00555556	Up
GO:0150078	positive regulation of neuroinflammatory response	4/720	18/18866	0.00419709	0.020506	0.0149514	IL18/TREM2/IL1B/CCL3	4	geneontology_Biological_Process	0.00555556	Up
GO:0043254	regulation of protein-containing complex assembly	29/720	449/18866	0.00422261	0.0205976	0.0150182	PLEK/WAS/CORO1A/FES/HCLS1/PYCARD/TMC8/CLEC7A/PRKCD/PTK2B/TLR4/HCK/NCKAP1L/TRIOBP/LCP1/ARHGAP18/ARPC1B/CAPG/SNCA/FCHSD1/KANK3/ESAM/APOE/GMFG/ICAM1/CDH5/SLIT2/MAP2/SCIN	29	geneontology_Biological_Process	0.0402778	Up
GO:0032411	positive regulation of transporter activity	11/720	114/18866	0.00422458	0.0205976	0.0150182	CCR2/PRKCD/P2RY6/PTAFR/CTSS/TREM2/SHANK3/SGK1/CCL2/GSTM2/HSPA2	11	geneontology_Biological_Process	0.0152778	Up
GO:0034381	plasma lipoprotein particle clearance	8/720	68/18866	0.00424501	0.0206757	0.0150752	MSR1/GPIHBP1/NPC2/APOBR/HMOX1/APOE/APOC1/APOC2	8	geneontology_Biological_Process	0.0111111	Up
GO:1901654	response to ketone	16/720	200/18866	0.00432031	0.0210203	0.0153264	CYBB/P2RY6/PTAFR/CFLAR/TLR2/MAP4K1/ICAM1/SLIT2/IGFBP7/RAMP2/CYBA/GNG2/MAOB/SPP1/BGLAP/FOS	16	geneontology_Biological_Process	0.0222222	Up
GO:0048708	astrocyte differentiation	9/720	83/18866	0.00432469	0.0210203	0.0153264	C1QA/TLR4/S100A9/TREM2/IL1B/C5AR1/GRN/S100A8/LIF	9	geneontology_Biological_Process	0.0125	Up
GO:1902042	negative regulation of extrinsic apoptotic signaling pathway via death domain receptors	6/720	41/18866	0.00435243	0.0211333	0.0154088	CFLAR/HMOX1/ICAM1/GPX1/TNFSF10/HGF	6	geneontology_Biological_Process	0.00833333	Up
GO:0019835	cytolysis	5/720	29/18866	0.00442758	0.0213878	0.0155944	LYZ/GZMH/APOL1/PRF1/GZMA	5	geneontology_Biological_Process	0.00694444	Up
GO:0033032	regulation of myeloid cell apoptotic process	5/720	29/18866	0.00442758	0.0213878	0.0155944	CCR5/FCER1G/CLEC5A/IRF7/CCL5	5	geneontology_Biological_Process	0.00694444	Up
GO:0043032	positive regulation of macrophage activation	5/720	29/18866	0.00442758	0.0213878	0.0155944	TLR4/TREM2/HAVCR2/CEBPA/CCL3	5	geneontology_Biological_Process	0.00694444	Up
GO:0050690	regulation of defense response to virus by virus	5/720	29/18866	0.00442758	0.0213878	0.0155944	DOCK2/CD4/HCK/LCK/CD247	5	geneontology_Biological_Process	0.00694444	Up
GO:0050820	positive regulation of coagulation	5/720	29/18866	0.00442758	0.0213878	0.0155944	PLEK/TLR4/F11R/THBD/F3	5	geneontology_Biological_Process	0.00694444	Up
GO:0008277	regulation of G protein-coupled receptor signaling pathway	13/720	148/18866	0.00443493	0.0214014	0.0156042	PLEK/RASGRP4/RGS18/ARRB2/APLNR/RAMP3/SNCA/RGS5/C3/RAMP2/RGS1/RGS10/CCL5	13	geneontology_Biological_Process	0.0180556	Up
GO:0046777	protein autophosphorylation	18/720	237/18866	0.00444235	0.0214152	0.0156143	RIPK3/BTK/FES/PTK2B/ZAP70/HCK/FGR/CSF1R/LCK/PTPRC/RASSF2/ENG/SLA/PDGFB/MINK1/TEK/MAP4K1/MVP	18	geneontology_Biological_Process	0.025	Up
GO:0014074	response to purine-containing compound	13/720	149/18866	0.00469437	0.022607	0.0164833	TRPM2/P2RY6/PTAFR/PTK2B/SELL/IL1B/RAPGEF3/TEK/THBD/MMP19/PLA2G5/GSTM2/FOS	13	geneontology_Biological_Process	0.0180556	Up
GO:0001954	positive regulation of cell-matrix adhesion	7/720	55/18866	0.00472755	0.0226739	0.0165321	CX3CL1/PTK2B/CD3E/PTPRJ/CSF1/TEK/COL16A1	7	geneontology_Biological_Process	0.00972222	Up
GO:0008347	glial cell migration	7/720	55/18866	0.00472755	0.0226739	0.0165321	CCR2/CX3CL1/TREM2/CSF1/CCL2/CX3CR1/CCL3	7	geneontology_Biological_Process	0.00972222	Up
GO:0045620	negative regulation of lymphocyte differentiation	7/720	55/18866	0.00472755	0.0226739	0.0165321	FGL2/CD74/JAK3/NFKBID/LAG3/IRF1/MDK	7	geneontology_Biological_Process	0.00972222	Up
GO:0051353	positive regulation of oxidoreductase activity	7/720	55/18866	0.00472755	0.0226739	0.0165321	RIPK3/PTK2B/IL1B/SNCA/APOE/CYBA/AGT	7	geneontology_Biological_Process	0.00972222	Up
GO:0002220	innate immune response activating cell surface receptor signaling pathway	11/720	116/18866	0.00482103	0.0230987	0.0168418	CD209/CLEC10A/PRKCD/FCN1/CARD9/FCER1G/LILRA2/CLEC4E/CLEC4A/PSMB9/MUC15	11	geneontology_Biological_Process	0.0152778	Up
GO:0090279	regulation of calcium ion import	6/720	42/18866	0.00491729	0.023512	0.0171432	RAMP3/PDGFB/TRPV2/CCL2/CXCL12/CCL3	6	geneontology_Biological_Process	0.00833333	Up
GO:1904037	positive regulation of epithelial cell apoptotic process	6/720	42/18866	0.00491729	0.023512	0.0171432	ARRB2/COL18A1/CCL2/CD40/ECSCR/SFRP4	6	geneontology_Biological_Process	0.00833333	Up
GO:0043154	negative regulation of cysteine-type endopeptidase activity involved in apoptotic process	9/720	85/18866	0.00506613	0.0241746	0.0176262	ARRB2/CFLAR/GAS6/NAIP/SNCA/CD27/GPX1/IFI6/HGF	9	geneontology_Biological_Process	0.0125	Up
GO:0110110	positive regulation of animal organ morphogenesis	9/720	85/18866	0.00506613	0.0241746	0.0176262	CFLAR/CSF1/ENG/CD34/JAG1/TGFBR2/LIF/MDK/AGT	9	geneontology_Biological_Process	0.0125	Up
GO:0002534	cytokine production involved in inflammatory response	8/720	70/18866	0.00507355	0.0241855	0.0176342	ALOX5/PYCARD/GPSM3/CLEC7A/TLR4/IL17RA/SIRPA/PLD4	8	geneontology_Biological_Process	0.0111111	Up
GO:0044788	modulation by host of viral process	5/720	30/18866	0.00514913	0.0244388	0.0178189	CSF1R/CCL8/APOE/IFI27/PTX3	5	geneontology_Biological_Process	0.00694444	Up
GO:0002922	positive regulation of humoral immune response	4/720	19/18866	0.00515785	0.0244388	0.0178189	FCGR2B/PTPRC/IL1B/C3	4	geneontology_Biological_Process	0.00555556	Up
GO:0031643	positive regulation of myelination	4/720	19/18866	0.00515785	0.0244388	0.0178189	ITGAX/TNFRSF1B/CST7/HGF	4	geneontology_Biological_Process	0.00555556	Up
GO:0046629	gamma-delta T cell activation	4/720	19/18866	0.00515785	0.0244388	0.0178189	JAML/LILRB1/NCKAP1L/PTPRC	4	geneontology_Biological_Process	0.00555556	Up
GO:0070233	negative regulation of T cell apoptotic process	4/720	19/18866	0.00515785	0.0244388	0.0178189	DOCK8/JAK3/CD27/CCL5	4	geneontology_Biological_Process	0.00555556	Up
GO:2000251	positive regulation of actin cytoskeleton reorganization	4/720	19/18866	0.00515785	0.0244388	0.0178189	FES/HCLS1/HCK/TEK	4	geneontology_Biological_Process	0.00555556	Up
GO:0031295	T cell costimulation	7/720	56/18866	0.00522917	0.0247517	0.0180471	VAV1/PTPN6/CD3E/LCK/TNFSF13B/TNFRSF14/CD86	7	geneontology_Biological_Process	0.00972222	Up
GO:0002664	regulation of T cell tolerance induction	3/720	10/18866	0.00543236	0.0254828	0.0185801	LILRB2/CD3E/TGFBR2	3	geneontology_Biological_Process	0.00416667	Up
GO:0019062	virion attachment to host cell	3/720	10/18866	0.00543236	0.0254828	0.0185801	CD209/GAS6/ICAM1	3	geneontology_Biological_Process	0.00416667	Up
GO:0032817	regulation of natural killer cell proliferation	3/720	10/18866	0.00543236	0.0254828	0.0185801	IL18/HLA-E/PTPN22	3	geneontology_Biological_Process	0.00416667	Up
GO:0034154	toll-like receptor 7 signaling pathway	3/720	10/18866	0.00543236	0.0254828	0.0185801	PIK3AP1/HAVCR2/PTPN22	3	geneontology_Biological_Process	0.00416667	Up
GO:0071104	response to interleukin-9	3/720	10/18866	0.00543236	0.0254828	0.0185801	STAT5A/JAK3/IL2RG	3	geneontology_Biological_Process	0.00416667	Up
GO:0071670	smooth muscle cell chemotaxis	3/720	10/18866	0.00543236	0.0254828	0.0185801	AIF1/SLIT2/MDK	3	geneontology_Biological_Process	0.00416667	Up
GO:0072124	regulation of glomerular mesangial cell proliferation	3/720	10/18866	0.00543236	0.0254828	0.0185801	CFLAR/PDGFB/EGR1	3	geneontology_Biological_Process	0.00416667	Up
GO:1900426	positive regulation of defense response to bacterium	3/720	10/18866	0.00543236	0.0254828	0.0185801	HAVCR2/CYBA/GRN	3	geneontology_Biological_Process	0.00416667	Up
GO:2000109	regulation of macrophage apoptotic process	3/720	10/18866	0.00543236	0.0254828	0.0185801	CCR5/IRF7/CCL5	3	geneontology_Biological_Process	0.00416667	Up
GO:0014910	regulation of smooth muscle cell migration	9/720	86/18866	0.00547197	0.0256175	0.0186783	AIF1/P2RY6/PDGFB/SLIT2/NDRG4/CCL5/MDK/SEMA6D/AGT	9	geneontology_Biological_Process	0.0125	Up
GO:0042509	regulation of tyrosine phosphorylation of STAT protein	9/720	86/18866	0.00547197	0.0256175	0.0186783	HCLS1/IL18/CSF1R/OSM/SH2B3/CD40/SOCS3/LIF/CCL5	9	geneontology_Biological_Process	0.0125	Up
GO:0061138	morphogenesis of a branching epithelium	15/720	187/18866	0.00548425	0.0256495	0.0187017	PLXND1/CSF1/SPINT2/ENG/NOTCH4/ST14/TGFBR2/SLIT2/CTSZ/SOCS3/SULF1/TGM2/MDK/HGF/AGT	15	geneontology_Biological_Process	0.0208333	Up
GO:0042531	positive regulation of tyrosine phosphorylation of STAT protein	8/720	71/18866	0.00553154	0.025845	0.0188442	HCLS1/IL18/CSF1R/OSM/CD40/SOCS3/LIF/CCL5	8	geneontology_Biological_Process	0.0111111	Up
GO:0032874	positive regulation of stress-activated MAPK cascade	14/720	170/18866	0.00570294	0.0266194	0.0194088	FGD2/NCF1/PYCARD/PTK2B/TLR4/FCGR2B/CARD9/IL1B/RASSF2/MINK1/CD27/TNFRSF11A/MAP4K1/CCN2	14	geneontology_Biological_Process	0.0194444	Up
GO:0002828	regulation of type 2 immune response	5/720	31/18866	0.00595007	0.0276905	0.0201898	CCR2/CD74/IL18/NLRP3/CD86	5	geneontology_Biological_Process	0.00694444	Up
GO:0045940	positive regulation of steroid metabolic process	5/720	31/18866	0.00595007	0.0276905	0.0201898	ABCG1/IL1B/APOE/APOC1/AGT	5	geneontology_Biological_Process	0.00694444	Up
GO:0070229	negative regulation of lymphocyte apoptotic process	5/720	31/18866	0.00595007	0.0276905	0.0201898	DOCK8/CD74/JAK3/CD27/CCL5	5	geneontology_Biological_Process	0.00694444	Up
GO:0043647	inositol phosphate metabolic process	8/720	72/18866	0.00602038	0.02799	0.0204082	PLCB2/PLEK/P2RY6/PTAFR/INPP5D/PTK2B/SNCA/PLD4	8	geneontology_Biological_Process	0.0111111	Up
GO:0035307	positive regulation of protein dephosphorylation	6/720	44/18866	0.00620573	0.0288233	0.0210157	LILRB2/PRKCD/CD33/PTPRC/CD300A/CDH5	6	geneontology_Biological_Process	0.00833333	Up
GO:0002544	chronic inflammatory response	4/720	20/18866	0.00625541	0.028883	0.0210592	S100A9/UNC13D/S100A8/CCL5	4	geneontology_Biological_Process	0.00555556	Up
GO:0002726	positive regulation of T cell cytokine production	4/720	20/18866	0.00625541	0.028883	0.0210592	SASH3/IL18/NLRP3/IL1B	4	geneontology_Biological_Process	0.00555556	Up
GO:0002827	positive regulation of T-helper 1 type immune response	4/720	20/18866	0.00625541	0.028883	0.0210592	CCR2/IL18/IL1B/SLC11A1	4	geneontology_Biological_Process	0.00555556	Up
GO:0032816	positive regulation of natural killer cell activation	4/720	20/18866	0.00625541	0.028883	0.0210592	IL18/HLA-E/TYROBP/GAS6	4	geneontology_Biological_Process	0.00555556	Up
GO:0071636	positive regulation of transforming growth factor beta production	4/720	20/18866	0.00625541	0.028883	0.0210592	CX3CL1/LGALS9/CD34/CD200	4	geneontology_Biological_Process	0.00555556	Up
GO:2000193	positive regulation of fatty acid transport	4/720	20/18866	0.00625541	0.028883	0.0210592	IL1B/ACSL5/PLA2G6/TNFRSF11A	4	geneontology_Biological_Process	0.00555556	Up
GO:0032273	positive regulation of protein polymerization	12/720	137/18866	0.00626527	0.0289001	0.0210718	WAS/CORO1A/FES/PYCARD/PTK2B/HCK/NCKAP1L/ARPC1B/FCHSD1/GMFG/ICAM1/SCIN	12	geneontology_Biological_Process	0.0166667	Up
GO:0070304	positive regulation of stress-activated protein kinase signaling cascade	14/720	172/18866	0.00631051	0.0290802	0.0212031	FGD2/NCF1/PYCARD/PTK2B/TLR4/FCGR2B/CARD9/IL1B/RASSF2/MINK1/CD27/TNFRSF11A/MAP4K1/CCN2	14	geneontology_Biological_Process	0.0194444	Up
GO:0007566	embryo implantation	7/720	58/18866	0.00635089	0.0291522	0.0212555	ARHGDIB/IL1B/CST3/TGFBR2/IGFBP7/SPP1/LIF	7	geneontology_Biological_Process	0.00972222	Up
GO:0031294	lymphocyte costimulation	7/720	58/18866	0.00635089	0.0291522	0.0212555	VAV1/PTPN6/CD3E/LCK/TNFSF13B/TNFRSF14/CD86	7	geneontology_Biological_Process	0.00972222	Up
GO:0031638	zymogen activation	7/720	58/18866	0.00635089	0.0291522	0.0212555	PYCARD/VSIR/CLEC3B/C1RL/CTSZ/C1R/PLAT	7	geneontology_Biological_Process	0.00972222	Up
GO:0043551	regulation of phosphatidylinositol 3-kinase activity	7/720	58/18866	0.00635089	0.0291522	0.0212555	PTK2B/PIK3R5/FGR/PDGFB/TEK/PIK3IP1/SOCS3	7	geneontology_Biological_Process	0.00972222	Up
GO:0032231	regulation of actin filament bundle assembly	10/720	104/18866	0.00638667	0.0292878	0.0213544	PLEK/WAS/CX3CL1/SHANK3/RAPGEF3/F11R/ARHGEF15/S1PR1/CCN2/SHANK1	10	geneontology_Biological_Process	0.0138889	Up
GO:0033209	tumor necrosis factor-mediated signaling pathway	14/720	173/18866	0.00663313	0.0303588	0.0221353	PYCARD/TNFSF13/LTB/PTK2B/TNFSF12/CASP1/TNFRSF1B/GAS6/TNFSF13B/TNFRSF14/CD27/TNFRSF11A/CD40/PSMB9	14	geneontology_Biological_Process	0.0194444	Up
GO:0048660	regulation of smooth muscle cell proliferation	14/720	173/18866	0.00663313	0.0303588	0.0221353	AIF1/P2RY6/IL18/CX3CL1/PTAFR/PDGFB/HMOX1/S1PR1/TGFBR2/CYBA/NDRG4/TGM2/CCL5/AGT	14	geneontology_Biological_Process	0.0194444	Up
GO:0035456	response to interferon-beta	5/720	32/18866	0.00683477	0.0311907	0.0227419	MNDA/IRF1/IFITM2/XAF1/BST2	5	geneontology_Biological_Process	0.00694444	Up
GO:0051385	response to mineralocorticoid	5/720	32/18866	0.00683477	0.0311907	0.0227419	CYBB/CYBA/MAOB/CCN2/FOS	5	geneontology_Biological_Process	0.00694444	Up
GO:0051968	positive regulation of synaptic transmission, glutamatergic	5/720	32/18866	0.00683477	0.0311907	0.0227419	CCR2/PTK2B/SHANK3/CCL2/SHANK1	5	geneontology_Biological_Process	0.00694444	Up
GO:0002639	positive regulation of immunoglobulin production	6/720	45/18866	0.00693465	0.0315852	0.0230295	SASH3/TNFSF13/HLA-E/PTPRC/CD40/MZB1	6	geneontology_Biological_Process	0.00833333	Up
GO:0034105	positive regulation of tissue remodeling	6/720	45/18866	0.00693465	0.0315852	0.0230295	IL18/ADAM8/TNFRSF11A/LTBP3/SPP1/DCSTAMP	6	geneontology_Biological_Process	0.00833333	Up
GO:0032481	positive regulation of type I interferon production	8/720	74/18866	0.00709574	0.0322877	0.0235417	IRF5/CD14/TLR4/DHX58/TLR2/PTPN22/IRF1/IRF7	8	geneontology_Biological_Process	0.0111111	Up
GO:0071496	cellular response to external stimulus	22/720	326/18866	0.00723786	0.0325293	0.0237179	FES/AIF1/TLR4/FOLR2/CASP1/PTPRC/IL1B/GAS6/ENG/TLR5/CD68/IRF1/HMOX1/F11R/CD40/ICAM1/GSDMD/CYBA/VCAM1/BGLAP/FOS/AGT	22	geneontology_Biological_Process	0.0305556	Up
GO:0021700	developmental maturation	20/720	287/18866	0.00724669	0.0325293	0.0237179	BTK/C1QA/LYL1/CLEC7A/CX3CL1/PTK2B/SCARF1/ACVRL1/IGSF21/CEBPA/ARHGEF15/RHEX/POU2F2/S1PR1/CDH5/CX3CR1/C3/EPAS1/SYBU/SHANK1	20	geneontology_Biological_Process	0.0277778	Up
GO:0001787	natural killer cell proliferation	3/720	11/18866	0.00725947	0.0325293	0.0237179	IL18/HLA-E/PTPN22	3	geneontology_Biological_Process	0.00416667	Up
GO:0001820	serotonin secretion	3/720	11/18866	0.00725947	0.0325293	0.0237179	LILRB1/FCER1G/MAOB	3	geneontology_Biological_Process	0.00416667	Up
GO:0006054	N-acetylneuraminate metabolic process	3/720	11/18866	0.00725947	0.0325293	0.0237179	ST6GAL1/NPL/RENBP	3	geneontology_Biological_Process	0.00416667	Up
GO:0009629	response to gravity	3/720	11/18866	0.00725947	0.0325293	0.0237179	PTAFR/BGLAP/FOS	3	geneontology_Biological_Process	0.00416667	Up
GO:0033860	regulation of NAD(P)H oxidase activity	3/720	11/18866	0.00725947	0.0325293	0.0237179	SLAMF8/CYBA/AGT	3	geneontology_Biological_Process	0.00416667	Up
GO:0045628	regulation of T-helper 2 cell differentiation	3/720	11/18866	0.00725947	0.0325293	0.0237179	IL18/NLRP3/CD86	3	geneontology_Biological_Process	0.00416667	Up
GO:0046642	negative regulation of alpha-beta T cell proliferation	3/720	11/18866	0.00725947	0.0325293	0.0237179	VSIR/LGALS9/TNFRSF14	3	geneontology_Biological_Process	0.00416667	Up
GO:0046643	regulation of gamma-delta T cell activation	3/720	11/18866	0.00725947	0.0325293	0.0237179	LILRB1/NCKAP1L/PTPRC	3	geneontology_Biological_Process	0.00416667	Up
GO:0051132	NK T cell activation	3/720	11/18866	0.00725947	0.0325293	0.0237179	RASAL3/IL18/CD300A	3	geneontology_Biological_Process	0.00416667	Up
GO:0070339	response to bacterial lipopeptide	3/720	11/18866	0.00725947	0.0325293	0.0237179	CD14/TLR2/TLR1	3	geneontology_Biological_Process	0.00416667	Up
GO:0071220	cellular response to bacterial lipoprotein	3/720	11/18866	0.00725947	0.0325293	0.0237179	CD14/TLR2/TLR1	3	geneontology_Biological_Process	0.00416667	Up
GO:0071221	cellular response to bacterial lipopeptide	3/720	11/18866	0.00725947	0.0325293	0.0237179	CD14/TLR2/TLR1	3	geneontology_Biological_Process	0.00416667	Up
GO:0072110	glomerular mesangial cell proliferation	3/720	11/18866	0.00725947	0.0325293	0.0237179	CFLAR/PDGFB/EGR1	3	geneontology_Biological_Process	0.00416667	Up
GO:0090193	positive regulation of glomerulus development	3/720	11/18866	0.00725947	0.0325293	0.0237179	CFLAR/PDGFB/EGR1	3	geneontology_Biological_Process	0.00416667	Up
GO:0015850	organic hydroxy compound transport	19/720	268/18866	0.00731671	0.0327286	0.0238632	SLCO2B1/LILRB1/ABCG1/MSR1/FCER1G/SNCA/NPC2/ABCC3/APOE/CXCL12/EMB/APOC1/PLTP/MAOB/SPP1/SNCG/APOC2/AGT/ITGB3	19	geneontology_Biological_Process	0.0263889	Up
GO:0048659	smooth muscle cell proliferation	14/720	175/18866	0.00731785	0.0327286	0.0238632	AIF1/P2RY6/IL18/CX3CL1/PTAFR/PDGFB/HMOX1/S1PR1/TGFBR2/CYBA/NDRG4/TGM2/CCL5/AGT	14	geneontology_Biological_Process	0.0194444	Up
GO:0003177	pulmonary valve development	4/720	21/18866	0.00749761	0.0334689	0.024403	TNFRSF1B/GJA5/JAG1/SLIT2	4	geneontology_Biological_Process	0.00555556	Up
GO:0032616	interleukin-13 production	4/720	21/18866	0.00749761	0.0334689	0.024403	IL18/HLA-E/NLRP3/LGALS9	4	geneontology_Biological_Process	0.00555556	Up
GO:0030203	glycosaminoglycan metabolic process	13/720	158/18866	0.0076209	0.033987	0.0247808	FUCA1/IL1B/HYAL2/IDUA/PDGFB/ITIH4/EXT1/CHST1/LYVE1/HYAL1/HGF/VCAN/EGFLAM	13	geneontology_Biological_Process	0.0180556	Up
GO:0001836	release of cytochrome c from mitochondria	7/720	60/18866	0.00764257	0.0340192	0.0248042	PYCARD/ARRB2/PLA2G6/GPX1/IFI6/TNFSF10/HGF	7	geneontology_Biological_Process	0.00972222	Up
GO:0042093	T-helper cell differentiation	7/720	60/18866	0.00764257	0.0340192	0.0248042	IL18/NLRP3/SEMA4A/JAK3/NFKBID/CD86/BATF	7	geneontology_Biological_Process	0.00972222	Up
GO:0030858	positive regulation of epithelial cell differentiation	8/720	75/18866	0.00768486	0.0341428	0.0248943	ACVRL1/PRKCH/F11R/CDH5/PLAAT4/LIF/CLDN5/SFRP4	8	geneontology_Biological_Process	0.0111111	Up
GO:1900076	regulation of cellular response to insulin stimulus	8/720	75/18866	0.00768486	0.0341428	0.0248943	PRKCD/IL1B/PTPRE/TNS2/SOCS3/MZB1/BGLAP/AGT	8	geneontology_Biological_Process	0.0111111	Up
GO:0016053	organic acid biosynthetic process	24/720	368/18866	0.0078014	0.0345896	0.0252201	ALOX5/CD74/PTGS1/HPGDS/ALOX5AP/LTC4S/IL1B/GGT7/PDGFB/SDSL/HSD3B7/DPYD/CSAD/BHMT2/SLC45A3/ACCS/SDS/GGT5/APOC1/PLA2G5/HYAL1/GSTM2/APOC2/VCAN	24	geneontology_Biological_Process	0.0333333	Up
GO:0033028	myeloid cell apoptotic process	5/720	33/18866	0.00780747	0.0345896	0.0252201	CCR5/FCER1G/CLEC5A/IRF7/CCL5	5	geneontology_Biological_Process	0.00694444	Up
GO:0046627	negative regulation of insulin receptor signaling pathway	5/720	33/18866	0.00780747	0.0345896	0.0252201	PRKCD/IL1B/PTPRE/TNS2/SOCS3	5	geneontology_Biological_Process	0.00694444	Up
GO:0090303	positive regulation of wound healing	7/720	61/18866	0.00835663	0.036953	0.0269433	PLEK/CLEC7A/TLR4/F11R/THBD/F3/SMOC2	7	geneontology_Biological_Process	0.00972222	Up
GO:1902041	regulation of extrinsic apoptotic signaling pathway via death domain receptors	7/720	61/18866	0.00835663	0.036953	0.0269433	TMC8/CFLAR/HMOX1/ICAM1/GPX1/TNFSF10/HGF	7	geneontology_Biological_Process	0.00972222	Up
GO:0006953	acute-phase response	6/720	47/18866	0.00857513	0.0378028	0.0275629	CD163/SERPINA1/IL1B/SIGIRR/TNFRSF11A/ITIH4	6	geneontology_Biological_Process	0.00833333	Up
GO:0030574	collagen catabolic process	6/720	47/18866	0.00857513	0.0378028	0.0275629	VSIR/CTSS/COL15A1/CST3/MMP19/CTSK	6	geneontology_Biological_Process	0.00833333	Up
GO:0035850	epithelial cell differentiation involved in kidney development	6/720	47/18866	0.00857513	0.0378028	0.0275629	PDGFB/CD34/JAG1/PODXL/ACTA2/LIF	6	geneontology_Biological_Process	0.00833333	Up
GO:0051656	establishment of organelle localization	27/720	432/18866	0.00858096	0.0378028	0.0275629	BTK/FES/MYO1F/MYO7A/MYO1G/STXBP2/FGR/LAT2/CD300A/SERPINA1/LGALS9/VAMP8/FCER1G/ADGRE2/UNC13D/RAC2/HMOX1/LAT/MILR1/CD84/CTSZ/TCIRG1/MLPH/MAP2/MX1/SYBU/F5	27	geneontology_Biological_Process	0.0375	Up
GO:0010922	positive regulation of phosphatase activity	5/720	34/18866	0.00887232	0.0387368	0.0282439	RIPK3/PLEK/CD33/PTPRC/CD300A	5	geneontology_Biological_Process	0.00694444	Up
GO:0032232	negative regulation of actin filament bundle assembly	5/720	34/18866	0.00887232	0.0387368	0.0282439	WAS/SHANK3/F11R/S1PR1/SHANK1	5	geneontology_Biological_Process	0.00694444	Up
GO:0051482	positive regulation of cytosolic calcium ion concentration involved in phospholipase C-activating G protein-coupled signaling pathway	5/720	34/18866	0.00887232	0.0387368	0.0282439	C3AR1/GNA15/LPAR6/S1PR1/TGM2	5	geneontology_Biological_Process	0.00694444	Up
GO:0055094	response to lipoprotein particle	5/720	34/18866	0.00887232	0.0387368	0.0282439	TLR4/ITGB2/FCER1G/CD68/APOE	5	geneontology_Biological_Process	0.00694444	Up
GO:2000352	negative regulation of endothelial cell apoptotic process	5/720	34/18866	0.00887232	0.0387368	0.0282439	GAS6/TEK/ICAM1/CDH5/RAMP2	5	geneontology_Biological_Process	0.00694444	Up
GO:0032069	regulation of nuclease activity	4/720	22/18866	0.00889177	0.0387368	0.0282439	PRKCD/NEIL1/OAS1/GZMA	4	geneontology_Biological_Process	0.00555556	Up
GO:0034104	negative regulation of tissue remodeling	4/720	22/18866	0.00889177	0.0387368	0.0282439	INPP5D/CST3/GPR137B/AGT	4	geneontology_Biological_Process	0.00555556	Up
GO:0035584	calcium-mediated signaling using intracellular calcium source	4/720	22/18866	0.00889177	0.0387368	0.0282439	TRPM2/PTPRC/PTPRJ/VCAM1	4	geneontology_Biological_Process	0.00555556	Up
GO:0045624	positive regulation of T-helper cell differentiation	4/720	22/18866	0.00889177	0.0387368	0.0282439	IL18/NLRP3/NFKBID/CD86	4	geneontology_Biological_Process	0.00555556	Up
GO:1901739	regulation of myoblast fusion	4/720	22/18866	0.00889177	0.0387368	0.0282439	CD53/CFLAR/CXCL10/CXCL9	4	geneontology_Biological_Process	0.00555556	Up
GO:1903019	negative regulation of glycoprotein metabolic process	4/720	22/18866	0.00889177	0.0387368	0.0282439	JAK3/CST3/ITM2A/PTX3	4	geneontology_Biological_Process	0.00555556	Up
GO:2000114	regulation of establishment of cell polarity	4/720	22/18866	0.00889177	0.0387368	0.0282439	DOCK8/PTK2B/CDH5/SHTN1	4	geneontology_Biological_Process	0.00555556	Up
GO:0045926	negative regulation of growth	18/720	254/18866	0.00892187	0.038832	0.0283134	ARHGAP4/SEMA4A/SOX17/PTPRJ/ACVRL1/HYAL2/SEMA3G/TGFBR2/SLIT2/SEMA7A/SPP1/BST2/HYAL1/SEMA4B/MAP2/SEMA6D/DCSTAMP/AGT	18	geneontology_Biological_Process	0.025	Up
GO:0034329	cell junction assembly	27/720	434/18866	0.0090894	0.0395246	0.0288183	GJA4/PTK2B/SEMA4A/PLXND1/IL1B/PTPRJ/SHANK3/ACVRL1/TLR2/ARVCF/MICALL2/PRKCH/GJA5/SNCA/TEK/CLSTN3/SH3BP1/ESAM/F11R/AMIGO2/CDH5/RAMP2/EPB41L3/CLDN5/SHANK1/AGT/COL16A1	27	geneontology_Biological_Process	0.0375	Up
GO:0002517	T cell tolerance induction	3/720	12/18866	0.00940768	0.0402026	0.0293127	LILRB2/CD3E/TGFBR2	3	geneontology_Biological_Process	0.00416667	Up
GO:0002713	negative regulation of B cell mediated immunity	3/720	12/18866	0.00940768	0.0402026	0.0293127	PARP3/PTPN6/FCGR2B	3	geneontology_Biological_Process	0.00416667	Up
GO:0002730	regulation of dendritic cell cytokine production	3/720	12/18866	0.00940768	0.0402026	0.0293127	TLR4/JAK3/BST2	3	geneontology_Biological_Process	0.00416667	Up
GO:0002890	negative regulation of immunoglobulin mediated immune response	3/720	12/18866	0.00940768	0.0402026	0.0293127	PARP3/PTPN6/FCGR2B	3	geneontology_Biological_Process	0.00416667	Up
GO:0002923	regulation of humoral immune response mediated by circulating immunoglobulin	3/720	12/18866	0.00940768	0.0402026	0.0293127	PTPN6/FCGR2B/PTPRC	3	geneontology_Biological_Process	0.00416667	Up
GO:0032621	interleukin-18 production	3/720	12/18866	0.00940768	0.0402026	0.0293127	NLRP3/TLR2/CD84	3	geneontology_Biological_Process	0.00416667	Up
GO:0032736	positive regulation of interleukin-13 production	3/720	12/18866	0.00940768	0.0402026	0.0293127	HLA-E/NLRP3/LGALS9	3	geneontology_Biological_Process	0.00416667	Up
GO:0032905	transforming growth factor beta1 production	3/720	12/18866	0.00940768	0.0402026	0.0293127	CX3CL1/NRROS/TYROBP	3	geneontology_Biological_Process	0.00416667	Up
GO:0032957	inositol trisphosphate metabolic process	3/720	12/18866	0.00940768	0.0402026	0.0293127	P2RY6/PTAFR/PTK2B	3	geneontology_Biological_Process	0.00416667	Up
GO:0033234	negative regulation of protein sumoylation	3/720	12/18866	0.00940768	0.0402026	0.0293127	CAPN3/MAGEA2/MAGEA2B	3	geneontology_Biological_Process	0.00416667	Up
GO:0035739	CD4-positive, alpha-beta T cell proliferation	3/720	12/18866	0.00940768	0.0402026	0.0293127	VSIR/LGALS9/TGFBR2	3	geneontology_Biological_Process	0.00416667	Up
GO:0044650	adhesion of symbiont to host cell	3/720	12/18866	0.00940768	0.0402026	0.0293127	CD209/GAS6/ICAM1	3	geneontology_Biological_Process	0.00416667	Up
GO:0060670	branching involved in labyrinthine layer morphogenesis	3/720	12/18866	0.00940768	0.0402026	0.0293127	SPINT2/ST14/SOCS3	3	geneontology_Biological_Process	0.00416667	Up
GO:0070243	regulation of thymocyte apoptotic process	3/720	12/18866	0.00940768	0.0402026	0.0293127	JAK3/NFKBID/ADAM8	3	geneontology_Biological_Process	0.00416667	Up
GO:0070572	positive regulation of neuron projection regeneration	3/720	12/18866	0.00940768	0.0402026	0.0293127	SCARF1/GRN/HGF	3	geneontology_Biological_Process	0.00416667	Up
GO:0071639	positive regulation of monocyte chemotactic protein-1 production	3/720	12/18866	0.00940768	0.0402026	0.0293127	CLEC7A/LGALS9/IL1B	3	geneontology_Biological_Process	0.00416667	Up
GO:0071888	macrophage apoptotic process	3/720	12/18866	0.00940768	0.0402026	0.0293127	CCR5/IRF7/CCL5	3	geneontology_Biological_Process	0.00416667	Up
GO:1903961	positive regulation of anion transmembrane transport	3/720	12/18866	0.00940768	0.0402026	0.0293127	PTAFR/ACSL5/AGT	3	geneontology_Biological_Process	0.00416667	Up
GO:2000561	regulation of CD4-positive, alpha-beta T cell proliferation	3/720	12/18866	0.00940768	0.0402026	0.0293127	VSIR/LGALS9/TGFBR2	3	geneontology_Biological_Process	0.00416667	Up
GO:0032872	regulation of stress-activated MAPK cascade	17/720	237/18866	0.00968679	0.0413579	0.030155	FGD2/NCF1/PYCARD/PTK2B/TLR4/FCGR2B/CARD9/SIRPA/IL1B/RASSF2/MINK1/CD27/PTPN22/TNFRSF11A/MAP4K1/CCN2/HGF	17	geneontology_Biological_Process	0.0236111	Up
GO:0031334	positive regulation of protein-containing complex assembly	18/720	257/18866	0.00999867	0.0426507	0.0310976	PLEK/WAS/CORO1A/FES/PYCARD/CLEC7A/PTK2B/TLR4/HCK/NCKAP1L/LCP1/ARPC1B/SNCA/FCHSD1/GMFG/ICAM1/CDH5/SCIN	18	geneontology_Biological_Process	0.025	Up
GO:0098801	regulation of renal system process	5/720	35/18866	0.0100333	0.0427211	0.0311489	GAS6/PDGFB/GJA5/CYBA/AGT	5	geneontology_Biological_Process	0.00694444	Up
GO:1900077	negative regulation of cellular response to insulin stimulus	5/720	35/18866	0.0100333	0.0427211	0.0311489	PRKCD/IL1B/PTPRE/TNS2/SOCS3	5	geneontology_Biological_Process	0.00694444	Up
GO:0010594	regulation of endothelial cell migration	17/720	238/18866	0.010075	0.0428597	0.03125	PTK2B/STAT5A/SEMA4A/ACVRL1/PDGFB/PTPRM/TEK/VASH1/SH3BP1/HMOX1/APOE/CD40/SLIT2/GRN/SMOC2/AGT/ITGB3	17	geneontology_Biological_Process	0.0236111	Up
GO:0001763	morphogenesis of a branching structure	15/720	201/18866	0.0103932	0.0441531	0.0321931	PLXND1/CSF1/SPINT2/ENG/NOTCH4/ST14/TGFBR2/SLIT2/CTSZ/SOCS3/SULF1/TGM2/MDK/HGF/AGT	15	geneontology_Biological_Process	0.0208333	Up
GO:0007035	vacuolar acidification	4/720	23/18866	0.0104447	0.0441531	0.0321931	SLC11A1/GRN/TCIRG1/ATP6V0D2	4	geneontology_Biological_Process	0.00555556	Up
GO:0045649	regulation of macrophage differentiation	4/720	23/18866	0.0104447	0.0441531	0.0321931	HCLS1/C1QC/CSF1/LIF	4	geneontology_Biological_Process	0.00555556	Up
GO:0045723	positive regulation of fatty acid biosynthetic process	4/720	23/18866	0.0104447	0.0441531	0.0321931	CD74/IL1B/SLC45A3/APOC2	4	geneontology_Biological_Process	0.00555556	Up
GO:0051043	regulation of membrane protein ectodomain proteolysis	4/720	23/18866	0.0104447	0.0441531	0.0321931	TNFRSF1B/IL1B/ADAM8/APOE	4	geneontology_Biological_Process	0.00555556	Up
GO:1900017	positive regulation of cytokine production involved in inflammatory response	4/720	23/18866	0.0104447	0.0441531	0.0321931	GPSM3/CLEC7A/TLR4/IL17RA	4	geneontology_Biological_Process	0.00555556	Up
GO:1901984	negative regulation of protein acetylation	4/720	23/18866	0.0104447	0.0441531	0.0321931	SPI1/SNCA/MAGEA2/MAGEA2B	4	geneontology_Biological_Process	0.00555556	Up
GO:0090199	regulation of release of cytochrome c from mitochondria	6/720	49/18866	0.0104765	0.0442475	0.0322619	PYCARD/ARRB2/PLA2G6/GPX1/TNFSF10/HGF	6	geneontology_Biological_Process	0.00833333	Up
GO:0034101	erythrocyte homeostasis	11/720	129/18866	0.0104939	0.0442813	0.0322865	HCLS1/IKZF1/INPP5D/NCKAP1L/JAK3/SPI1/SH2B3/HMOX1/RHEX/EPAS1/ZFP36	11	geneontology_Biological_Process	0.0152778	Up
GO:0043433	negative regulation of DNA-binding transcription factor activity	14/720	183/18866	0.0106375	0.0448071	0.0326699	PYCARD/NLRP3/ADORA3/ARRB2/PARP10/NFKBID/HAVCR2/GAS6/TMIGD3/SIGIRR/HMOX1/NLRC5/CD200/SFRP4	14	geneontology_Biological_Process	0.0194444	Up
GO:2001235	positive regulation of apoptotic signaling pathway	14/720	183/18866	0.0106375	0.0448071	0.0326699	RIPK3/PYCARD/PRKCD/TNFSF12/LCK/PTPRC/S100A9/LGALS9/HYAL2/PLA2G6/S100A8/G0S2/TNFSF10/AGT	14	geneontology_Biological_Process	0.0194444	Up
GO:1900449	regulation of glutamate receptor signaling pathway	7/720	64/18866	0.0107931	0.0454219	0.0331182	CCR2/CX3CL1/PTK2B/SHANK3/MINK1/CCL2/SHANK1	7	geneontology_Biological_Process	0.00972222	Up
GO:0070302	regulation of stress-activated protein kinase signaling cascade	17/720	240/18866	0.0108884	0.0457821	0.0333808	FGD2/NCF1/PYCARD/PTK2B/TLR4/FCGR2B/CARD9/SIRPA/IL1B/RASSF2/MINK1/CD27/PTPN22/TNFRSF11A/MAP4K1/CCN2/HGF	17	geneontology_Biological_Process	0.0236111	Up
GO:0007568	aging	21/720	319/18866	0.0111415	0.046804	0.0341259	C1QA/PRKCD/CX3CL1/INPP5D/ITGB2/TNFRSF1B/HYAL2/ENG/SERPING1/VASH1/CD68/TGFBR2/ICAM1/COL4A2/ECRG4/BGLAP/CCN2/MAGEA2/FOS/AGT/MAGEA2B	21	geneontology_Biological_Process	0.0291667	Up
GO:0003151	outflow tract morphogenesis	8/720	80/18866	0.0111969	0.0469948	0.034265	SOX17/PLXND1/ENG/GJA5/JAG1/TGFBR2/DHRS3/CLDN5	8	geneontology_Biological_Process	0.0111111	Up
GO:0001569	branching involved in blood vessel morphogenesis	5/720	36/18866	0.0112944	0.0471936	0.0344099	PLXND1/ENG/NOTCH4/TGFBR2/MDK	5	geneontology_Biological_Process	0.00694444	Up
GO:0003382	epithelial cell morphogenesis	5/720	36/18866	0.0112944	0.0471936	0.0344099	SPINT2/COL15A1/NOTCH4/COL18A1/ST14	5	geneontology_Biological_Process	0.00694444	Up
GO:0033280	response to vitamin D	5/720	36/18866	0.0112944	0.0471936	0.0344099	FES/CD4/CXCL10/SPP1/BGLAP	5	geneontology_Biological_Process	0.00694444	Up
GO:0045622	regulation of T-helper cell differentiation	5/720	36/18866	0.0112944	0.0471936	0.0344099	IL18/NLRP3/JAK3/NFKBID/CD86	5	geneontology_Biological_Process	0.00694444	Up
GO:0071634	regulation of transforming growth factor beta production	5/720	36/18866	0.0112944	0.0471936	0.0344099	CX3CL1/TYROBP/LGALS9/CD34/CD200	5	geneontology_Biological_Process	0.00694444	Up
GO:0010718	positive regulation of epithelial to mesenchymal transition	6/720	50/18866	0.0115313	0.0480982	0.0350695	IL1B/ENG/DAB2/JAG1/TGFBR2/MDK	6	geneontology_Biological_Process	0.00833333	Up
GO:0045806	negative regulation of endocytosis	6/720	50/18866	0.0115313	0.0480982	0.0350695	LILRB1/CD300A/MCTP1/SCAMP5/APOC1/APOC2	6	geneontology_Biological_Process	0.00833333	Up
GO:0002371	dendritic cell cytokine production	3/720	13/18866	0.0118875	0.0488477	0.035616	TLR4/JAK3/BST2	3	geneontology_Biological_Process	0.00416667	Up
GO:0002638	negative regulation of immunoglobulin production	3/720	13/18866	0.0118875	0.0488477	0.035616	PARP3/CD22/FCGR2B	3	geneontology_Biological_Process	0.00416667	Up
GO:0002679	respiratory burst involved in defense response	3/720	13/18866	0.0118875	0.0488477	0.035616	SLAMF8/HCK/GRN	3	geneontology_Biological_Process	0.00416667	Up
GO:0008228	opsonization	3/720	13/18866	0.0118875	0.0488477	0.035616	C4B/PLA2G5/PTX3	3	geneontology_Biological_Process	0.00416667	Up
GO:0010642	negative regulation of platelet-derived growth factor receptor signaling pathway	3/720	13/18866	0.0118875	0.0488477	0.035616	PTPRJ/SNCA/NDRG4	3	geneontology_Biological_Process	0.00416667	Up
GO:0016264	gap junction assembly	3/720	13/18866	0.0118875	0.0488477	0.035616	IL1B/GJA5/AGT	3	geneontology_Biological_Process	0.00416667	Up
GO:0031115	negative regulation of microtubule polymerization	3/720	13/18866	0.0118875	0.0488477	0.035616	SNCA/CDH5/MAP2	3	geneontology_Biological_Process	0.00416667	Up
GO:0031953	negative regulation of protein autophosphorylation	3/720	13/18866	0.0118875	0.0488477	0.035616	PTPRC/ENG/MVP	3	geneontology_Biological_Process	0.00416667	Up
GO:0032493	response to bacterial lipoprotein	3/720	13/18866	0.0118875	0.0488477	0.035616	CD14/TLR2/TLR1	3	geneontology_Biological_Process	0.00416667	Up
GO:0034370	triglyceride-rich lipoprotein particle remodeling	3/720	13/18866	0.0118875	0.0488477	0.035616	GPIHBP1/APOE/APOC2	3	geneontology_Biological_Process	0.00416667	Up
GO:0045602	negative regulation of endothelial cell differentiation	3/720	13/18866	0.0118875	0.0488477	0.035616	ACVRL1/NOTCH4/JAG1	3	geneontology_Biological_Process	0.00416667	Up
GO:0060100	positive regulation of phagocytosis, engulfment	3/720	13/18866	0.0118875	0.0488477	0.035616	NCKAP1L/TREM2/C3	3	geneontology_Biological_Process	0.00416667	Up
GO:0071415	cellular response to purine-containing compound	3/720	13/18866	0.0118875	0.0488477	0.035616	TRPM2/P2RY6/GSTM2	3	geneontology_Biological_Process	0.00416667	Up
GO:1900272	negative regulation of long-term synaptic potentiation	3/720	13/18866	0.0118875	0.0488477	0.035616	TYROBP/APOE/CX3CR1	3	geneontology_Biological_Process	0.00416667	Up
GO:1902947	regulation of tau-protein kinase activity	3/720	13/18866	0.0118875	0.0488477	0.035616	C5AR1/HGF/EGR1	3	geneontology_Biological_Process	0.00416667	Up
GO:1903236	regulation of leukocyte tethering or rolling	3/720	13/18866	0.0118875	0.0488477	0.035616	CCR2/PTAFR/CXCL12	3	geneontology_Biological_Process	0.00416667	Up
GO:1905155	positive regulation of membrane invagination	3/720	13/18866	0.0118875	0.0488477	0.035616	NCKAP1L/TREM2/C3	3	geneontology_Biological_Process	0.00416667	Up
GO:0001960	negative regulation of cytokine-mediated signaling pathway	8/720	81/18866	0.0120216	0.0493559	0.0359865	PTPRC/GAS6/SH2B3/SIGIRR/SAMHD1/SLIT2/NLRC5/CCL5	8	geneontology_Biological_Process	0.0111111	Up
GO:0050770	regulation of axonogenesis	14/720	186/18866	0.0121492	0.0497183	0.0362508	ARHGAP4/SEMA4A/PLXND1/SEMA3G/TRPV2/APOE/SLIT2/CXCL12/SHTN1/SEMA7A/SPP1/SEMA4B/MAP2/SEMA6D	14	geneontology_Biological_Process	0.0194444	Up
GO:0002719	negative regulation of cytokine production involved in immune response	4/720	24/18866	0.0121628	0.0497183	0.0362508	LILRB1/JAK3/HMOX1/BST2	4	geneontology_Biological_Process	0.00555556	Up
GO:0010640	regulation of platelet-derived growth factor receptor signaling pathway	4/720	24/18866	0.0121628	0.0497183	0.0362508	PTPRJ/SNCA/NDRG4/F3	4	geneontology_Biological_Process	0.00555556	Up
GO:0019883	antigen processing and presentation of endogenous antigen	4/720	24/18866	0.0121628	0.0497183	0.0362508	CD74/HLA-E/CD1D/HLA-C	4	geneontology_Biological_Process	0.00555556	Up
GO:0097186	amelogenesis	4/720	24/18866	0.0121628	0.0497183	0.0362508	FAM20A/CSF3R/TCIRG1/KLK4	4	geneontology_Biological_Process	0.00555556	Up
GO:0031623	receptor internalization	10/720	115/18866	0.0125974	0.0514504	0.0375137	LILRB1/ITGB2/ARRB2/RAMP3/FCER1G/SNCA/RAMP2/MX1/SFRP4/ITGB3	10	geneontology_Biological_Process	0.0138889	Up
GO:0046626	regulation of insulin receptor signaling pathway	7/720	66/18866	0.0126803	0.0517442	0.0377279	PRKCD/IL1B/PTPRE/TNS2/SOCS3/MZB1/AGT	7	geneontology_Biological_Process	0.00972222	Up
GO:0022617	extracellular matrix disassembly	8/720	82/18866	0.0128902	0.0525096	0.0382859	CTSS/LCP1/TPSAB1/ADAM8/CST3/MMP19/KLK4/CTSK	8	geneontology_Biological_Process	0.0111111	Up
GO:1902930	regulation of alcohol biosynthetic process	8/720	82/18866	0.0128902	0.0525096	0.0382859	PLEK/P2RY6/PTAFR/PTK2B/ABCG1/IL1B/SNCA/APOE	8	geneontology_Biological_Process	0.0111111	Up
GO:0007411	axon guidance	19/720	284/18866	0.0130583	0.0531483	0.0387517	DOK2/CSF1R/SEMA4A/PLXND1/SHANK3/SEMA3G/PTPRM/RAC2/ROBO4/SCN1B/SLIT2/CXCL12/EXT1/PDLIM7/EMB/SEMA7A/SEMA4B/BOC/SEMA6D	19	geneontology_Biological_Process	0.0263889	Up
GO:0050871	positive regulation of B cell activation	12/720	151/18866	0.0130963	0.053257	0.0388309	SASH3/BTK/CD74/TNFSF13/INPP5D/TLR4/NCKAP1L/PTPRC/TNFSF13B/CD27/CD40/IGLL5	12	geneontology_Biological_Process	0.0166667	Up
GO:0097485	neuron projection guidance	19/720	285/18866	0.0135106	0.054894	0.0400245	DOK2/CSF1R/SEMA4A/PLXND1/SHANK3/SEMA3G/PTPRM/RAC2/ROBO4/SCN1B/SLIT2/CXCL12/EXT1/PDLIM7/EMB/SEMA7A/SEMA4B/BOC/SEMA6D	19	geneontology_Biological_Process	0.0263889	Up
GO:0046683	response to organophosphorus	11/720	134/18866	0.0136917	0.0555819	0.0405261	P2RY6/PTAFR/PTK2B/SELL/IL1B/RAPGEF3/TEK/THBD/MMP19/PLA2G5/FOS	11	geneontology_Biological_Process	0.0152778	Up
GO:0043550	regulation of lipid kinase activity	7/720	67/18866	0.013708	0.0556001	0.0405393	PTK2B/PIK3R5/FGR/PDGFB/TEK/PIK3IP1/SOCS3	7	geneontology_Biological_Process	0.00972222	Up
GO:0001570	vasculogenesis	8/720	83/18866	0.0138039	0.0559408	0.0407878	EGFL7/APLNR/SOX17/ENG/CD34/TGFBR2/RAMP2/TIE1	8	geneontology_Biological_Process	0.0111111	Up
GO:0048545	response to steroid hormone	22/720	346/18866	0.0138377	0.0560295	0.0408525	AIF1/CYBB/PTAFR/ARRB2/CFLAR/TLR2/ENG/DAB2/TGFBR2/ICAM1/SLIT2/IGFBP7/RAMP2/CYBA/MAOB/SPP1/ZFP36/BGLAP/CCN2/MDK/FOS/KDM5D	22	geneontology_Biological_Process	0.0305556	Up
GO:0032647	regulation of interferon-alpha production	4/720	25/18866	0.0140516	0.056798	0.0414128	IRF5/TLR4/HAVCR2/IRF7	4	geneontology_Biological_Process	0.00555556	Up
GO:0050857	positive regulation of antigen receptor-mediated signaling pathway	4/720	25/18866	0.0140516	0.056798	0.0414128	NFAM1/LCK/PTPRC/PRKCH	4	geneontology_Biological_Process	0.00555556	Up
GO:0046394	carboxylic acid biosynthetic process	23/720	367/18866	0.0140847	0.0568807	0.0414731	ALOX5/CD74/PTGS1/HPGDS/ALOX5AP/LTC4S/IL1B/GGT7/PDGFB/SDSL/HSD3B7/DPYD/BHMT2/SLC45A3/ACCS/SDS/GGT5/APOC1/PLA2G5/HYAL1/GSTM2/APOC2/VCAN	23	geneontology_Biological_Process	0.0319444	Up
GO:0051341	regulation of oxidoreductase activity	10/720	117/18866	0.0140963	0.0568807	0.0414731	RIPK3/SLAMF8/PTK2B/IL1B/SNCA/APOE/CYBA/CYGB/GZMA/AGT	10	geneontology_Biological_Process	0.0138889	Up
GO:0045069	regulation of viral genome replication	9/720	100/18866	0.0141917	0.0570887	0.0416247	PARP10/CCL8/OAS1/IFITM2/BST2/IFI27/CCL5/SLPI/MX1	9	geneontology_Biological_Process	0.0125	Up
GO:0045807	positive regulation of endocytosis	9/720	100/18866	0.0141917	0.0570887	0.0416247	CD14/NCKAP1L/ARRB2/TREM2/DAB2/SNCA/APOE/C3/SFRP4	9	geneontology_Biological_Process	0.0125	Up
GO:0007584	response to nutrient	13/720	171/18866	0.0141963	0.0570887	0.0416247	FES/CYBB/CD4/CD3E/FOLR2/GAS6/HMOX1/CXCL10/CD40/TGFBR2/C2/SPP1/BGLAP	13	geneontology_Biological_Process	0.0180556	Up
GO:0030856	regulation of epithelial cell differentiation	13/720	171/18866	0.0141963	0.0570887	0.0416247	IL1B/ACVRL1/PRKCH/NOTCH4/F11R/JAG1/CDH5/PLAAT4/ZFP36/LIF/CLDN5/SFRP4/CTSK	13	geneontology_Biological_Process	0.0180556	Up
GO:0001886	endothelial cell morphogenesis	3/720	14/18866	0.0147067	0.0585408	0.0426834	COL15A1/NOTCH4/COL18A1	3	geneontology_Biological_Process	0.00416667	Up
GO:0030207	chondroitin sulfate catabolic process	3/720	14/18866	0.0147067	0.0585408	0.0426834	IDUA/HYAL1/VCAN	3	geneontology_Biological_Process	0.00416667	Up
GO:0030213	hyaluronan biosynthetic process	3/720	14/18866	0.0147067	0.0585408	0.0426834	IL1B/PDGFB/HYAL1	3	geneontology_Biological_Process	0.00416667	Up
GO:0032488	Cdc42 protein signal transduction	3/720	14/18866	0.0147067	0.0585408	0.0426834	WAS/APOE/SHTN1	3	geneontology_Biological_Process	0.00416667	Up
GO:0032688	negative regulation of interferon-beta production	3/720	14/18866	0.0147067	0.0585408	0.0426834	PYCARD/LILRB1/SIRPA	3	geneontology_Biological_Process	0.00416667	Up
GO:0035589	G protein-coupled purinergic nucleotide receptor signaling pathway	3/720	14/18866	0.0147067	0.0585408	0.0426834	GPR34/P2RY6/PTAFR	3	geneontology_Biological_Process	0.00416667	Up
GO:0043922	negative regulation by host of viral transcription	3/720	14/18866	0.0147067	0.0585408	0.0426834	CCL4/CCL3/CCL5	3	geneontology_Biological_Process	0.00416667	Up
GO:0060732	positive regulation of inositol phosphate biosynthetic process	3/720	14/18866	0.0147067	0.0585408	0.0426834	P2RY6/PTAFR/SNCA	3	geneontology_Biological_Process	0.00416667	Up
GO:0072216	positive regulation of metanephros development	3/720	14/18866	0.0147067	0.0585408	0.0426834	PDGFB/LIF/EGR1	3	geneontology_Biological_Process	0.00416667	Up
GO:0072672	neutrophil extravasation	3/720	14/18866	0.0147067	0.0585408	0.0426834	JAML/ADAM8/MDK	3	geneontology_Biological_Process	0.00416667	Up
GO:1901722	regulation of cell proliferation involved in kidney development	3/720	14/18866	0.0147067	0.0585408	0.0426834	CFLAR/PDGFB/EGR1	3	geneontology_Biological_Process	0.00416667	Up
GO:1903726	negative regulation of phospholipid metabolic process	3/720	14/18866	0.0147067	0.0585408	0.0426834	PDGFB/PIK3IP1/APOC1	3	geneontology_Biological_Process	0.00416667	Up
GO:0015844	monoamine transport	8/720	84/18866	0.0147639	0.0587185	0.0428131	LILRB1/FCER1G/SNCA/CXCL12/MAOB/SNCG/AGT/ITGB3	8	geneontology_Biological_Process	0.0111111	Up
GO:0002244	hematopoietic progenitor cell differentiation	13/720	172/18866	0.0148411	0.058926	0.0429643	PLEK/ARL11/PTPN6/LMO2/CSF1R/PTPRC/SPI1/RBM47/OSM/HYAL2/PLD4/PSMB9/BATF	13	geneontology_Biological_Process	0.0180556	Up
GO:0006022	aminoglycan metabolic process	13/720	172/18866	0.0148411	0.058926	0.0429643	FUCA1/IL1B/HYAL2/IDUA/PDGFB/ITIH4/EXT1/CHST1/LYVE1/HYAL1/HGF/VCAN/EGFLAM	13	geneontology_Biological_Process	0.0180556	Up
GO:0050808	synapse organization	26/720	433/18866	0.015664	0.0621411	0.0453086	IL10RA/ITGAM/C1QA/C1QB/C1QC/LILRB2/CX3CL1/FCGR2B/SEMA4A/PLXND1/TREM2/SHANK3/IGSF21/TLR2/C5AR1/SNCA/CLSTN3/ARHGEF15/APOE/AMIGO2/CX3CR1/C3/SRGN/SNCG/SYBU/SHANK1	26	geneontology_Biological_Process	0.0361111	Up
GO:0032660	regulation of interleukin-17 production	5/720	39/18866	0.0157141	0.0622872	0.045415	VSIR/IL18/TLR4/NCKAP1L/OSM	5	geneontology_Biological_Process	0.00694444	Up
GO:0010769	regulation of cell morphogenesis involved in differentiation	20/720	310/18866	0.015912	0.0630186	0.0459484	ARHGAP4/SEMA4A/TRIOBP/PLXND1/SHANK3/SEMA3G/UNC13D/TRPV2/APOE/SLIT2/CXCL12/SHTN1/SEMA7A/SPP1/NEDD9/SEMA4B/MAP2/MDK/SEMA6D/GBP1	20	geneontology_Biological_Process	0.0277778	Up
GO:0033233	regulation of protein sumoylation	4/720	26/18866	0.0161165	0.0636676	0.0464215	CAPN3/MAGEA2/EGR1/MAGEA2B	4	geneontology_Biological_Process	0.00555556	Up
GO:0060706	cell differentiation involved in embryonic placenta development	4/720	26/18866	0.0161165	0.0636676	0.0464215	SPINT2/ST14/SOCS3/LIF	4	geneontology_Biological_Process	0.00555556	Up
GO:1903010	regulation of bone development	4/720	26/18866	0.0161165	0.0636676	0.0464215	LILRB1/TYROBP/GPR68/SIGLEC15	4	geneontology_Biological_Process	0.00555556	Up
GO:0001659	temperature homeostasis	13/720	174/18866	0.0161975	0.0639339	0.0466157	TRPM2/CCR2/IL18/TLR4/IL1B/UCP2/TRPV2/TNFRSF11A/EPAS1/GPX1/G0S2/ALDH1A1/EGR1	13	geneontology_Biological_Process	0.0180556	Up
GO:0006869	lipid transport	24/720	393/18866	0.0164152	0.0647389	0.0472026	SLCO2B1/PRKCD/ABCG1/IL1B/MSR1/SLCO2A1/ACSL5/PLA2G6/NPC2/APOBR/PSAP/TNFRSF11A/ABCC3/APOE/APOL3/APOL1/APOC1/APOL4/PLTP/SPP1/PLA2G5/APOC2/AGT/ITGB3	24	geneontology_Biological_Process	0.0333333	Up
GO:0006584	catecholamine metabolic process	6/720	54/18866	0.0165015	0.0649159	0.0473317	ITGAM/ITGB2/SULT1A4/SNCA/EPAS1/MAOB	6	geneontology_Biological_Process	0.00833333	Up
GO:0006749	glutathione metabolic process	6/720	54/18866	0.0165015	0.0649159	0.0473317	HPGDS/GGT7/GGT5/GPX1/GSTM2/GSTM5	6	geneontology_Biological_Process	0.00833333	Up
GO:0009712	catechol-containing compound metabolic process	6/720	54/18866	0.0165015	0.0649159	0.0473317	ITGAM/ITGB2/SULT1A4/SNCA/EPAS1/MAOB	6	geneontology_Biological_Process	0.00833333	Up
GO:0055076	transition metal ion homeostasis	11/720	138/18866	0.0167411	0.0658035	0.0479789	TMC8/LCK/S100A9/HYAL2/PRND/HMOX1/SLC11A1/EPAS1/SLC40A1/S100A8/STEAP4	11	geneontology_Biological_Process	0.0152778	Up
GO:0035335	peptidyl-tyrosine dephosphorylation	9/720	103/18866	0.0169493	0.0665663	0.0485351	PTPN6/PTPRC/PTPN18/PTPRJ/PTPRE/PTPN7/PTPRM/TNS2/PTPN22	9	geneontology_Biological_Process	0.0125	Up
GO:0001990	regulation of systemic arterial blood pressure by hormone	5/720	40/18866	0.0174108	0.0680948	0.0496495	CPA3/GJA5/CYBA/CTSZ/AGT	5	geneontology_Biological_Process	0.00694444	Up
GO:0032892	positive regulation of organic acid transport	5/720	40/18866	0.0174108	0.0680948	0.0496495	IL1B/ACSL5/PLA2G6/TNFRSF11A/AGT	5	geneontology_Biological_Process	0.00694444	Up
GO:0042417	dopamine metabolic process	5/720	40/18866	0.0174108	0.0680948	0.0496495	ITGAM/ITGB2/SULT1A4/SNCA/MAOB	5	geneontology_Biological_Process	0.00694444	Up
GO:0045746	negative regulation of Notch signaling pathway	5/720	40/18866	0.0174108	0.0680948	0.0496495	EGFL7/ARRDC1/GDPD5/TCIM/LFNG	5	geneontology_Biological_Process	0.00694444	Up
GO:0090184	positive regulation of kidney development	5/720	40/18866	0.0174108	0.0680948	0.0496495	CFLAR/PDGFB/LIF/EGR1/AGT	5	geneontology_Biological_Process	0.00694444	Up
GO:0030218	erythrocyte differentiation	10/720	121/18866	0.0174887	0.0683423	0.04983	HCLS1/IKZF1/INPP5D/NCKAP1L/JAK3/SPI1/SH2B3/RHEX/EPAS1/ZFP36	10	geneontology_Biological_Process	0.0138889	Up
GO:0023035	CD40 signaling pathway	3/720	15/18866	0.0178708	0.0692602	0.0504992	TREM2/CD40/CD86	3	geneontology_Biological_Process	0.00416667	Up
GO:0032645	regulation of granulocyte macrophage colony-stimulating factor production	3/720	15/18866	0.0178708	0.0692602	0.0504992	IL18/IL1B/CD84	3	geneontology_Biological_Process	0.00416667	Up
GO:0034638	phosphatidylcholine catabolic process	3/720	15/18866	0.0178708	0.0692602	0.0504992	PLA2G6/APOC1/PLA2G5	3	geneontology_Biological_Process	0.00416667	Up
GO:0038065	collagen-activated signaling pathway	3/720	15/18866	0.0178708	0.0692602	0.0504992	COL4A2/OSCAR/ITGA11	3	geneontology_Biological_Process	0.00416667	Up
GO:0044406	adhesion of symbiont to host	3/720	15/18866	0.0178708	0.0692602	0.0504992	CD209/GAS6/ICAM1	3	geneontology_Biological_Process	0.00416667	Up
GO:0045346	regulation of MHC class II biosynthetic process	3/720	15/18866	0.0178708	0.0692602	0.0504992	CIITA/TLR4/SPI1	3	geneontology_Biological_Process	0.00416667	Up
GO:0045651	positive regulation of macrophage differentiation	3/720	15/18866	0.0178708	0.0692602	0.0504992	HCLS1/CSF1/LIF	3	geneontology_Biological_Process	0.00416667	Up
GO:0090192	regulation of glomerulus development	3/720	15/18866	0.0178708	0.0692602	0.0504992	CFLAR/PDGFB/EGR1	3	geneontology_Biological_Process	0.00416667	Up
GO:1904464	regulation of matrix metallopeptidase secretion	3/720	15/18866	0.0178708	0.0692602	0.0504992	TLR4/TLR2/CD200	3	geneontology_Biological_Process	0.00416667	Up
GO:1990773	matrix metallopeptidase secretion	3/720	15/18866	0.0178708	0.0692602	0.0504992	TLR4/TLR2/CD200	3	geneontology_Biological_Process	0.00416667	Up
GO:0060761	negative regulation of response to cytokine stimulus	8/720	87/18866	0.0179341	0.0693695	0.0505789	PTPRC/GAS6/SH2B3/SIGIRR/SAMHD1/SLIT2/NLRC5/CCL5	8	geneontology_Biological_Process	0.0111111	Up
GO:0002931	response to ischemia	6/720	55/18866	0.0179432	0.0693695	0.0505789	CX3CL1/CSF1R/TREM2/CSF1/CX3CR1/EGR1	6	geneontology_Biological_Process	0.00833333	Up
GO:0051452	intracellular pH reduction	6/720	55/18866	0.0179432	0.0693695	0.0505789	SLAMF8/RAB20/SLC11A1/GRN/TCIRG1/ATP6V0D2	6	geneontology_Biological_Process	0.00833333	Up
GO:0006706	steroid catabolic process	4/720	27/18866	0.018362	0.0706403	0.0515055	SCARF1/HSD17B14/APOE/SPP1	4	geneontology_Biological_Process	0.00555556	Up
GO:0010714	positive regulation of collagen metabolic process	4/720	27/18866	0.018362	0.0706403	0.0515055	VSIR/ARRB2/ENG/CCN2	4	geneontology_Biological_Process	0.00555556	Up
GO:0032607	interferon-alpha production	4/720	27/18866	0.018362	0.0706403	0.0515055	IRF5/TLR4/HAVCR2/IRF7	4	geneontology_Biological_Process	0.00555556	Up
GO:0032897	negative regulation of viral transcription	4/720	27/18866	0.018362	0.0706403	0.0515055	CCL4/CCL3/ZFP36/CCL5	4	geneontology_Biological_Process	0.00555556	Up
GO:0045603	positive regulation of endothelial cell differentiation	4/720	27/18866	0.018362	0.0706403	0.0515055	ACVRL1/F11R/CDH5/CLDN5	4	geneontology_Biological_Process	0.00555556	Up
GO:2000353	positive regulation of endothelial cell apoptotic process	4/720	27/18866	0.018362	0.0706403	0.0515055	COL18A1/CCL2/CD40/ECSCR	4	geneontology_Biological_Process	0.00555556	Up
GO:0071695	anatomical structure maturation	16/720	235/18866	0.0185907	0.0714617	0.0521044	BTK/C1QA/LYL1/CLEC7A/CX3CL1/PTK2B/SCARF1/ACVRL1/CEBPA/RHEX/POU2F2/S1PR1/CDH5/CX3CR1/C3/EPAS1	16	geneontology_Biological_Process	0.0222222	Up
GO:0046889	positive regulation of lipid biosynthetic process	8/720	88/18866	0.0190917	0.0733277	0.0534649	CD74/PRKCD/ABCG1/IL1B/PLA2G6/APOE/SLC45A3/APOC2	8	geneontology_Biological_Process	0.0111111	Up
GO:0051216	cartilage development	14/720	197/18866	0.0191591	0.0735266	0.05361	ACVRL1/HYAL2/TGFBR2/LTBP3/HOXA3/SULF1/HYAL1/MATN3/CCN2/MDK/EPYC/BMP8B/SCIN/CTSK	14	geneontology_Biological_Process	0.0194444	Up
GO:0050832	defense response to fungus	5/720	41/18866	0.0192245	0.0737175	0.0537492	IL17RA/S100A9/S100A8/PLA2G5/GNLY	5	geneontology_Biological_Process	0.00694444	Up
GO:0060560	developmental growth involved in morphogenesis	16/720	236/18866	0.0192656	0.0738148	0.0538201	ARHGAP4/SEMA4A/SEMA3G/CSF1/TRPV2/APOE/S1PR1/TGFBR2/SLIT2/CXCL12/SHTN1/SEMA7A/SPP1/SEMA4B/MAP2/SEMA6D	16	geneontology_Biological_Process	0.0222222	Up
GO:0031529	ruffle organization	6/720	56/18866	0.0194689	0.0744119	0.0542554	PLEK/AIF1/CSF1R/ICAM1/TCIRG1/SNX10	6	geneontology_Biological_Process	0.00833333	Up
GO:0044273	sulfur compound catabolic process	6/720	56/18866	0.0194689	0.0744119	0.0542554	IDUA/GGT7/CSAD/GGT5/HYAL1/VCAN	6	geneontology_Biological_Process	0.00833333	Up
GO:1904645	response to amyloid-beta	6/720	56/18866	0.0194689	0.0744119	0.0542554	TLR4/FCGR2B/RAMP3/TREM2/ICAM1/VCAM1	6	geneontology_Biological_Process	0.00833333	Up
GO:0032091	negative regulation of protein binding	9/720	106/18866	0.0200792	0.07662	0.0558654	TMC8/PRKCD/ARRB2/DAB2/PDGFB/ATP2A3/CTSZ/MAP2/SLPI	9	geneontology_Biological_Process	0.0125	Up
GO:0032414	positive regulation of ion transmembrane transporter activity	9/720	106/18866	0.0200792	0.07662	0.0558654	CCR2/P2RY6/PTAFR/CTSS/TREM2/SHANK3/CCL2/GSTM2/HSPA2	9	geneontology_Biological_Process	0.0125	Up
GO:0001892	embryonic placenta development	8/720	89/18866	0.0203016	0.077406	0.0564385	SPINT2/PDGFB/VASH1/CEBPA/ST14/EPAS1/SOCS3/LIF	8	geneontology_Biological_Process	0.0111111	Up
GO:0090383	phagosome acidification	4/720	28/18866	0.0207921	0.0790841	0.057662	SLAMF8/RAB20/TCIRG1/ATP6V0D2	4	geneontology_Biological_Process	0.00555556	Up
GO:1990776	response to angiotensin	4/720	28/18866	0.0207921	0.0790841	0.057662	CYBB/PRKCD/CYBA/AGT	4	geneontology_Biological_Process	0.00555556	Up
GO:2000191	regulation of fatty acid transport	4/720	28/18866	0.0207921	0.0790841	0.057662	IL1B/ACSL5/PLA2G6/TNFRSF11A	4	geneontology_Biological_Process	0.00555556	Up
GO:0061005	cell differentiation involved in kidney development	6/720	57/18866	0.0210805	0.0801162	0.0584146	PDGFB/CD34/JAG1/PODXL/ACTA2/LIF	6	geneontology_Biological_Process	0.00833333	Up
GO:2001237	negative regulation of extrinsic apoptotic signaling pathway	9/720	107/18866	0.0212095	0.0805413	0.0587246	CX3CL1/CFLAR/IL1B/HMOX1/ICAM1/GPX1/IFI6/TNFSF10/HGF	9	geneontology_Biological_Process	0.0125	Up
GO:0072006	nephron development	11/720	143/18866	0.0212339	0.080569	0.0587448	CFLAR/PDGFB/TEK/CD34/JAG1/PODXL/SULF1/ACTA2/LIF/EGR1/AGT	11	geneontology_Biological_Process	0.0152778	Up
GO:0001780	neutrophil homeostasis	3/720	16/18866	0.0213827	0.0806134	0.0587771	CCR2/SH2B3/MERTK	3	geneontology_Biological_Process	0.00416667	Up
GO:0030214	hyaluronan catabolic process	3/720	16/18866	0.0213827	0.0806134	0.0587771	HYAL2/LYVE1/HYAL1	3	geneontology_Biological_Process	0.00416667	Up
GO:0033008	positive regulation of mast cell activation involved in immune response	3/720	16/18866	0.0213827	0.0806134	0.0587771	FGR/VAMP8/FCER1G	3	geneontology_Biological_Process	0.00416667	Up
GO:0043306	positive regulation of mast cell degranulation	3/720	16/18866	0.0213827	0.0806134	0.0587771	FGR/VAMP8/FCER1G	3	geneontology_Biological_Process	0.00416667	Up
GO:0051014	actin filament severing	3/720	16/18866	0.0213827	0.0806134	0.0587771	CAPG/GMFG/SCIN	3	geneontology_Biological_Process	0.00416667	Up
GO:0051770	positive regulation of nitric-oxide synthase biosynthetic process	3/720	16/18866	0.0213827	0.0806134	0.0587771	TLR4/TLR2/CCL2	3	geneontology_Biological_Process	0.00416667	Up
GO:0072224	metanephric glomerulus development	3/720	16/18866	0.0213827	0.0806134	0.0587771	PDGFB/CD34/EGR1	3	geneontology_Biological_Process	0.00416667	Up
GO:1900451	positive regulation of glutamate receptor signaling pathway	3/720	16/18866	0.0213827	0.0806134	0.0587771	CCR2/SHANK3/CCL2	3	geneontology_Biological_Process	0.00416667	Up
GO:0001952	regulation of cell-matrix adhesion	10/720	125/18866	0.0214484	0.0807964	0.0589105	CX3CL1/PTK2B/CD3E/PTPRJ/ACVRL1/CSF1/MINK1/TEK/JAG1/COL16A1	10	geneontology_Biological_Process	0.0138889	Up
GO:1901888	regulation of cell junction assembly	14/720	200/18866	0.0215182	0.0809944	0.0590549	SEMA4A/IL1B/PTPRJ/ACVRL1/TLR2/PRKCH/SNCA/TEK/CLSTN3/F11R/AMIGO2/CLDN5/AGT/COL16A1	14	geneontology_Biological_Process	0.0194444	Up
GO:0031099	regeneration	14/720	201/18866	0.0223511	0.0840622	0.0612917	LCP1/SCARF1/CFLAR/GAS6/C5AR1/HMOX1/TGFBR2/CXCL12/CAPN3/GPX1/GRN/SPP1/MDK/HGF	14	geneontology_Biological_Process	0.0194444	Up
GO:0010632	regulation of epithelial cell migration	19/720	301/18866	0.0225667	0.0848052	0.0618335	PTK2B/STAT5A/SEMA4A/ACVRL1/PDGFB/PTPRM/TEK/VASH1/SH3BP1/HMOX1/APOE/CD40/TGFBR2/SLIT2/GRN/HYAL1/SMOC2/AGT/ITGB3	19	geneontology_Biological_Process	0.0263889	Up
GO:2001259	positive regulation of cation channel activity	7/720	74/18866	0.0226226	0.0849475	0.0619372	CCR2/P2RY6/CTSS/TREM2/SHANK3/CCL2/GSTM2	7	geneontology_Biological_Process	0.00972222	Up
GO:0045851	pH reduction	6/720	58/18866	0.0227801	0.0854708	0.0623188	SLAMF8/RAB20/SLC11A1/GRN/TCIRG1/ATP6V0D2	6	geneontology_Biological_Process	0.00833333	Up
GO:0033273	response to vitamin	8/720	91/18866	0.022883	0.0857883	0.0625503	FES/CD4/FOLR2/GAS6/CXCL10/CD40/SPP1/BGLAP	8	geneontology_Biological_Process	0.0111111	Up
GO:0007179	transforming growth factor beta receptor signaling pathway	14/720	202/18866	0.0232079	0.0869371	0.0633879	NRROS/ARRB2/LPXN/ACVRL1/ENG/ZYX/DAB2/LTBP2/F11R/TGFBR2/CDH5/LTBP3/CLDN5/FOS	14	geneontology_Biological_Process	0.0194444	Up
GO:0033135	regulation of peptidyl-serine phosphorylation	11/720	145/18866	0.023259	0.0870593	0.063477	HCLS1/ARRB2/RAMP3/SH2D3C/GAS6/OSM/RASSF2/RAPGEF3/SNCA/LIF/HGF	11	geneontology_Biological_Process	0.0152778	Up
GO:0048873	homeostasis of number of cells within a tissue	4/720	29/18866	0.0234105	0.0874871	0.0637889	SASH3/CORO1A/CCR2/CSF1	4	geneontology_Biological_Process	0.00555556	Up
GO:2000108	positive regulation of leukocyte apoptotic process	4/720	29/18866	0.0234105	0.0874871	0.0637889	LGALS9/NFKBID/ADAM8/CCL5	4	geneontology_Biological_Process	0.00555556	Up
GO:0033138	positive regulation of peptidyl-serine phosphorylation	9/720	109/18866	0.0236062	0.0881485	0.0642712	HCLS1/ARRB2/RAMP3/SH2D3C/GAS6/OSM/RAPGEF3/SNCA/LIF	9	geneontology_Biological_Process	0.0125	Up
GO:0031100	animal organ regeneration	7/720	75/18866	0.0241603	0.0900033	0.0656235	LCP1/GAS6/C5AR1/HMOX1/TGFBR2/CXCL12/HGF	7	geneontology_Biological_Process	0.00972222	Up
GO:0061844	antimicrobial humoral immune response mediated by antimicrobial peptide	7/720	75/18866	0.0241603	0.0900033	0.0656235	S100A9/RNASE6/CXCL10/GNLY/CXCL2/CXCL9/CXCL11	7	geneontology_Biological_Process	0.00972222	Up
GO:1901983	regulation of protein acetylation	7/720	75/18866	0.0241603	0.0900033	0.0656235	SPI1/IL1B/RAPGEF3/SNCA/LIF/MAGEA2/MAGEA2B	7	geneontology_Biological_Process	0.00972222	Up
GO:0016485	protein processing	15/720	223/18866	0.0244152	0.0908811	0.0662636	PYCARD/VSIR/CLEC3B/CTSS/CASP1/CPA3/C1RL/ADAM8/F3/CTSZ/SRGN/C1R/CST7/PLAT/CPXM2	15	geneontology_Biological_Process	0.0208333	Up
GO:0007187	G protein-coupled receptor signaling pathway, coupled to cyclic nucleotide second messenger	17/720	263/18866	0.0244672	0.0910027	0.0663522	FPR1/RAMP3/GNA15/ADCY4/ADGRE2/PSAP/CXCL10/CCL2/S1PR1/MARCO/CCR1/RAMP2/GNG2/RGS1/CXCL9/CXCL11/AGT	17	geneontology_Biological_Process	0.0236111	Up
GO:0010038	response to metal ion	22/720	366/18866	0.0245209	0.0911303	0.0664453	TRPM2/NCF1/C1QA/RASA4B/CYBB/CD14/PTK2B/ALOX5AP/SNCA/CEBPA/HMOX1/RASA4/ICAM1/CAPN3/SLC40A1/MAOB/S100A8/ZACN/TCIRG1/BGLAP/FOS/RASGRP2	22	geneontology_Biological_Process	0.0305556	Up
GO:0048008	platelet-derived growth factor receptor signaling pathway	6/720	59/18866	0.0245694	0.0911665	0.0664716	PTPRJ/PDGFB/SNCA/NDRG4/F3/PLAT	6	geneontology_Biological_Process	0.00833333	Up
GO:0051058	negative regulation of small GTPase mediated signal transduction	6/720	59/18866	0.0245694	0.0911665	0.0664716	RASAL3/RASA4B/ARHGAP25/SH3BP1/RASA4/SLIT2	6	geneontology_Biological_Process	0.00833333	Up
GO:0003184	pulmonary valve morphogenesis	3/720	17/18866	0.0252436	0.0929353	0.0677613	GJA5/JAG1/SLIT2	3	geneontology_Biological_Process	0.00416667	Up
GO:0010819	regulation of T cell chemotaxis	3/720	17/18866	0.0252436	0.0929353	0.0677613	CCR2/CXCL10/CCL5	3	geneontology_Biological_Process	0.00416667	Up
GO:0015732	prostaglandin transport	3/720	17/18866	0.0252436	0.0929353	0.0677613	IL1B/SLCO2A1/TNFRSF11A	3	geneontology_Biological_Process	0.00416667	Up
GO:0019377	glycolipid catabolic process	3/720	17/18866	0.0252436	0.0929353	0.0677613	PRKCD/FUCA1/PSAP	3	geneontology_Biological_Process	0.00416667	Up
GO:0032305	positive regulation of icosanoid secretion	3/720	17/18866	0.0252436	0.0929353	0.0677613	IL1B/PLA2G6/TNFRSF11A	3	geneontology_Biological_Process	0.00416667	Up
GO:0035855	megakaryocyte development	3/720	17/18866	0.0252436	0.0929353	0.0677613	PTPN6/SH2B3/ZNF385A	3	geneontology_Biological_Process	0.00416667	Up
GO:0048535	lymph node development	3/720	17/18866	0.0252436	0.0929353	0.0677613	RIPK3/LTB/TNFRSF11A	3	geneontology_Biological_Process	0.00416667	Up
GO:0050665	hydrogen peroxide biosynthetic process	3/720	17/18866	0.0252436	0.0929353	0.0677613	CYBB/CYBA/MAOB	3	geneontology_Biological_Process	0.00416667	Up
GO:0070206	protein trimerization	3/720	17/18866	0.0252436	0.0929353	0.0677613	CD74/ALOX5AP/STEAP4	3	geneontology_Biological_Process	0.00416667	Up
GO:0070242	thymocyte apoptotic process	3/720	17/18866	0.0252436	0.0929353	0.0677613	JAK3/NFKBID/ADAM8	3	geneontology_Biological_Process	0.00416667	Up
GO:0031670	cellular response to nutrient	5/720	44/18866	0.0253942	0.0931979	0.0679528	FES/FOLR2/GAS6/HMOX1/BGLAP	5	geneontology_Biological_Process	0.00694444	Up
GO:0032620	interleukin-17 production	5/720	44/18866	0.0253942	0.0931979	0.0679528	VSIR/IL18/TLR4/NCKAP1L/OSM	5	geneontology_Biological_Process	0.00694444	Up
GO:0032965	regulation of collagen biosynthetic process	5/720	44/18866	0.0253942	0.0931979	0.0679528	CIITA/ARRB2/ENG/CYGB/CCN2	5	geneontology_Biological_Process	0.00694444	Up
GO:0085029	extracellular matrix assembly	5/720	44/18866	0.0253942	0.0931979	0.0679528	GAS6/MYH11/LTBP3/RAMP2/AGT	5	geneontology_Biological_Process	0.00694444	Up
GO:0051384	response to glucocorticoid	11/720	147/18866	0.0254216	0.0932255	0.0679729	AIF1/PTAFR/CFLAR/ICAM1/SLIT2/IGFBP7/MAOB/ZFP36/BGLAP/MDK/FOS	11	geneontology_Biological_Process	0.0152778	Up
GO:0019216	regulation of lipid metabolic process	25/720	431/18866	0.0255049	0.0934585	0.0681428	CD74/PRKCD/PTK2B/PIK3R5/FGR/ABCG1/IL1B/PLA2G6/TAZ/RUBCNL/PDGFB/TEK/NPC2/PIK3IP1/PSAP/APOE/SLC45A3/IGFBP7/C3/APOC1/SOCS3/G0S2/APOC2/EGR1/AGT	25	geneontology_Biological_Process	0.0347222	Up
GO:0001516	prostaglandin biosynthetic process	4/720	30/18866	0.0262199	0.09578	0.0698354	CD74/PTGS1/HPGDS/IL1B	4	geneontology_Biological_Process	0.00555556	Up
GO:0034110	regulation of homotypic cell-cell adhesion	4/720	30/18866	0.0262199	0.09578	0.0698354	PRKCD/SH2B3/F11R/CCL5	4	geneontology_Biological_Process	0.00555556	Up
GO:0046457	prostanoid biosynthetic process	4/720	30/18866	0.0262199	0.09578	0.0698354	CD74/PTGS1/HPGDS/IL1B	4	geneontology_Biological_Process	0.00555556	Up
GO:0051125	regulation of actin nucleation	4/720	30/18866	0.0262199	0.09578	0.0698354	WAS/CORO1A/GMFG/SCIN	4	geneontology_Biological_Process	0.00555556	Up
GO:0031644	regulation of nervous system process	11/720	148/18866	0.0265559	0.096932	0.0706754	PTAFR/PTK2B/ITGAX/TNFRSF1B/SHANK3/TYMP/CCL3/CST7/HGF/SHANK1/AGT	11	geneontology_Biological_Process	0.0152778	Up
GO:0051591	response to cAMP	8/720	94/18866	0.0271752	0.0991159	0.0722677	PTAFR/PTK2B/RAPGEF3/TEK/THBD/MMP19/PLA2G5/FOS	8	geneontology_Biological_Process	0.0111111	Up
GO:0070830	bicellular tight junction assembly	7/720	77/18866	0.0274479	0.100033	0.0729362	MICALL2/PRKCH/ESAM/F11R/CDH5/RAMP2/CLDN5	7	geneontology_Biological_Process	0.00972222	Up
GO:0070266	necroptotic process	5/720	45/18866	0.0277016	0.100801	0.0734967	RIPK3/CD14/TLR4/CFLAR/LY96	5	geneontology_Biological_Process	0.00694444	Up
GO:1904646	cellular response to amyloid-beta	5/720	45/18866	0.0277016	0.100801	0.0734967	TLR4/FCGR2B/TREM2/ICAM1/VCAM1	5	geneontology_Biological_Process	0.00694444	Up
GO:0036293	response to decreased oxygen levels	22/720	371/18866	0.0279877	0.101764	0.0741982	CYBB/PTK2B/CFLAR/ACVRL1/TLR2/UCP2/TEK/CD34/ADAM8/HMOX1/CST3/TGFBR2/ICAM1/CXCL12/RAMP2/EPAS1/PSMB9/CYBA/CYGB/PLAT/CCN2/EGR1	22	geneontology_Biological_Process	0.0305556	Up
GO:0006027	glycosaminoglycan catabolic process	6/720	61/18866	0.028424	0.103191	0.0752387	FUCA1/HYAL2/IDUA/LYVE1/HYAL1/VCAN	6	geneontology_Biological_Process	0.00833333	Up
GO:0010574	regulation of vascular endothelial growth factor production	6/720	61/18866	0.028424	0.103191	0.0752387	CCR2/C3AR1/IL1B/C5AR1/C3/SULF1	6	geneontology_Biological_Process	0.00833333	Up
GO:0002223	stimulatory C-type lectin receptor signaling pathway	9/720	113/18866	0.0289675	0.105082	0.0766181	CD209/CLEC10A/PRKCD/CARD9/FCER1G/CLEC4E/CLEC4A/PSMB9/MUC15	9	geneontology_Biological_Process	0.0125	Up
GO:0010713	negative regulation of collagen metabolic process	3/720	18/18866	0.0294529	0.10627	0.077484	CIITA/CST3/CYGB	3	geneontology_Biological_Process	0.00416667	Up
GO:0032048	cardiolipin metabolic process	3/720	18/18866	0.0294529	0.10627	0.077484	PLA2G6/TAZ/PLA2G5	3	geneontology_Biological_Process	0.00416667	Up
GO:0032656	regulation of interleukin-13 production	3/720	18/18866	0.0294529	0.10627	0.077484	HLA-E/NLRP3/LGALS9	3	geneontology_Biological_Process	0.00416667	Up
GO:0046597	negative regulation of viral entry into host cell	3/720	18/18866	0.0294529	0.10627	0.077484	FCN1/IFITM2/PTX3	3	geneontology_Biological_Process	0.00416667	Up
GO:0051023	regulation of immunoglobulin secretion	3/720	18/18866	0.0294529	0.10627	0.077484	CD22/HLA-E/CD40	3	geneontology_Biological_Process	0.00416667	Up
GO:0071605	monocyte chemotactic protein-1 production	3/720	18/18866	0.0294529	0.10627	0.077484	CLEC7A/LGALS9/IL1B	3	geneontology_Biological_Process	0.00416667	Up
GO:0071637	regulation of monocyte chemotactic protein-1 production	3/720	18/18866	0.0294529	0.10627	0.077484	CLEC7A/LGALS9/IL1B	3	geneontology_Biological_Process	0.00416667	Up
GO:0010595	positive regulation of endothelial cell migration	10/720	132/18866	0.0298846	0.107745	0.0785594	PTK2B/STAT5A/PDGFB/TEK/HMOX1/CD40/GRN/SMOC2/AGT/ITGB3	10	geneontology_Biological_Process	0.0138889	Up
GO:0034614	cellular response to reactive oxygen species	12/720	170/18866	0.0300265	0.108174	0.078872	RIPK3/TRPM2/BTK/NCF1/PRKCD/SIRPA/CFLAR/MAPK13/PSAP/CST3/HGF/FOS	12	geneontology_Biological_Process	0.0166667	Up
GO:0031641	regulation of myelination	5/720	46/18866	0.030138	0.108409	0.0790437	ITGAX/TNFRSF1B/TYMP/CST7/HGF	5	geneontology_Biological_Process	0.00694444	Up
GO:1900744	regulation of p38MAPK cascade	5/720	46/18866	0.030138	0.108409	0.0790437	NCF1/IL1B/MINK1/PTPN22/HGF	5	geneontology_Biological_Process	0.00694444	Up
GO:0045216	cell-cell junction organization	14/720	210/18866	0.0309683	0.111309	0.0811581	GJA4/CSF1R/IL1B/ARVCF/MICALL2/PRKCH/GJA5/ESAM/F11R/CDH5/RAMP2/EPB41L3/CLDN5/AGT	14	geneontology_Biological_Process	0.0194444	Up
GO:0010001	glial cell differentiation	15/720	230/18866	0.0309915	0.111309	0.0811581	C1QA/HDAC10/NRROS/TLR4/S100A9/TNFRSF1B/TREM2/IL1B/TLR2/C5AR1/SLC45A3/GRN/S100A8/LIF/MDK	15	geneontology_Biological_Process	0.0208333	Up
GO:0120192	tight junction assembly	7/720	79/18866	0.0310266	0.11135	0.0811882	MICALL2/PRKCH/ESAM/F11R/CDH5/RAMP2/CLDN5	7	geneontology_Biological_Process	0.00972222	Up
GO:0042493	response to drug	23/720	397/18866	0.0315715	0.11322	0.0825511	CYBB/SLAMF8/PTK2B/LCK/NCKAP1L/CARD9/IL1B/GAS6/ENG/CD69/PTPRM/COL18A1/ABCC3/CST3/SLC12A5/TGFBR2/ICAM1/CYBA/MAOB/BGLAP/MDK/APOC2/FOS	23	geneontology_Biological_Process	0.0319444	Up
GO:0010876	lipid localization	25/720	440/18866	0.0316118	0.113278	0.0825934	SLCO2B1/PRKCD/ABCG1/IL1B/MSR1/SLCO2A1/ACSL5/PLA2G6/NPC2/APOBR/PSAP/TNFRSF11A/ABCC3/APOE/C3/APOL3/APOL1/APOC1/APOL4/PLTP/SPP1/PLA2G5/APOC2/AGT/ITGB3	25	geneontology_Biological_Process	0.0347222	Up
GO:0048640	negative regulation of developmental growth	9/720	115/18866	0.031945	0.114385	0.0834005	ARHGAP4/SEMA4A/SEMA3G/TGFBR2/SEMA7A/SPP1/SEMA4B/MAP2/SEMA6D	9	geneontology_Biological_Process	0.0125	Up
GO:0050849	negative regulation of calcium-mediated signaling	4/720	32/18866	0.0324211	0.115649	0.0843226	PLEK/CD22/TBC1D10C/GSTM2	4	geneontology_Biological_Process	0.00555556	Up
GO:0070528	protein kinase C signaling	4/720	32/18866	0.0324211	0.115649	0.0843226	PLEK/PLA2G6/PDGFB/CD40	4	geneontology_Biological_Process	0.00555556	Up
GO:0070570	regulation of neuron projection regeneration	4/720	32/18866	0.0324211	0.115649	0.0843226	SCARF1/GRN/SPP1/HGF	4	geneontology_Biological_Process	0.00555556	Up
GO:0071295	cellular response to vitamin	4/720	32/18866	0.0324211	0.115649	0.0843226	FES/FOLR2/GAS6/BGLAP	4	geneontology_Biological_Process	0.00555556	Up
GO:1903959	regulation of anion transmembrane transport	4/720	32/18866	0.0324211	0.115649	0.0843226	PTAFR/SLC43A2/ACSL5/AGT	4	geneontology_Biological_Process	0.00555556	Up
GO:1990138	neuron projection extension	12/720	172/18866	0.0324498	0.115664	0.0843332	ARHGAP4/SEMA4A/SEMA3G/TRPV2/APOE/SLIT2/CXCL12/SHTN1/SEMA7A/SEMA4B/MAP2/SEMA6D	12	geneontology_Biological_Process	0.0166667	Up
GO:0001991	regulation of systemic arterial blood pressure by circulatory renin-angiotensin	3/720	19/18866	0.0340083	0.120127	0.0875873	CPA3/GJA5/CTSZ	3	geneontology_Biological_Process	0.00416667	Up
GO:0002710	negative regulation of T cell mediated immunity	3/720	19/18866	0.0340083	0.120127	0.0875873	LILRB1/FCGR2B/PTPRC	3	geneontology_Biological_Process	0.00416667	Up
GO:0002862	negative regulation of inflammatory response to antigenic stimulus	3/720	19/18866	0.0340083	0.120127	0.0875873	HLA-DRB1/FCGR2B/GPX1	3	geneontology_Biological_Process	0.00416667	Up
GO:0003159	morphogenesis of an endothelium	3/720	19/18866	0.0340083	0.120127	0.0875873	ITGAX/ACVRL1/CXCL10	3	geneontology_Biological_Process	0.00416667	Up
GO:0015802	basic amino acid transport	3/720	19/18866	0.0340083	0.120127	0.0875873	SLC7A7/SLC11A1/AGT	3	geneontology_Biological_Process	0.00416667	Up
GO:0030050	vesicle transport along actin filament	3/720	19/18866	0.0340083	0.120127	0.0875873	MYO1F/MYO7A/MYO1G	3	geneontology_Biological_Process	0.00416667	Up
GO:0042053	regulation of dopamine metabolic process	3/720	19/18866	0.0340083	0.120127	0.0875873	ITGAM/ITGB2/MAOB	3	geneontology_Biological_Process	0.00416667	Up
GO:0042069	regulation of catecholamine metabolic process	3/720	19/18866	0.0340083	0.120127	0.0875873	ITGAM/ITGB2/MAOB	3	geneontology_Biological_Process	0.00416667	Up
GO:0061154	endothelial tube morphogenesis	3/720	19/18866	0.0340083	0.120127	0.0875873	ITGAX/ACVRL1/CXCL10	3	geneontology_Biological_Process	0.00416667	Up
GO:0071800	podosome assembly	3/720	19/18866	0.0340083	0.120127	0.0875873	BIN2/HCK/LCP1	3	geneontology_Biological_Process	0.00416667	Up
GO:1900424	regulation of defense response to bacterium	3/720	19/18866	0.0340083	0.120127	0.0875873	HAVCR2/CYBA/GRN	3	geneontology_Biological_Process	0.00416667	Up
GO:2000010	positive regulation of protein localization to cell surface	3/720	19/18866	0.0340083	0.120127	0.0875873	TYROBP/FCER1G/CD247	3	geneontology_Biological_Process	0.00416667	Up
GO:0010977	negative regulation of neuron projection development	11/720	154/18866	0.0341395	0.120228	0.0876611	ARHGAP4/SEMA4A/SEMA3G/APOE/SLIT2/SEMA7A/CTSZ/SPP1/SEMA4B/MAP2/SEMA6D	11	geneontology_Biological_Process	0.0152778	Up
GO:0062013	positive regulation of small molecule metabolic process	11/720	154/18866	0.0341395	0.120228	0.0876611	CD74/P2RY6/PTAFR/ABCG1/TREM2/IL1B/TAZ/PDGFB/SNCA/SLC45A3/APOC2	11	geneontology_Biological_Process	0.0152778	Up
GO:0009266	response to temperature stimulus	15/720	233/18866	0.0341757	0.120228	0.0876611	TRPM2/CD14/ARRB2/TFEC/UCP2/CD34/HMOX1/TRPV2/CXCL10/SLC12A5/TCIM/IGFBP7/CXCL12/FOS/HSPA2	15	geneontology_Biological_Process	0.0208333	Up
GO:0009743	response to carbohydrate	15/720	233/18866	0.0341757	0.120228	0.0876611	HLA-DRB1/CLEC7A/PTK2B/IL1B/GAS6/PLA2G6/MAPK13/CST3/TGFBR2/ICAM1/GPR68/CYBA/CCN2/SYBU/EGR1	15	geneontology_Biological_Process	0.0208333	Up
GO:2001234	negative regulation of apoptotic signaling pathway	15/720	233/18866	0.0341757	0.120228	0.0876611	CD74/CX3CL1/ARRB2/CFLAR/IL1B/ZNF385A/HMOX1/ICAM1/CX3CR1/CXCL12/GPX1/MEIS3/IFI6/TNFSF10/HGF	15	geneontology_Biological_Process	0.0208333	Up
GO:0071248	cellular response to metal ion	13/720	193/18866	0.0341902	0.120228	0.0876611	TRPM2/NCF1/RASA4B/CYBB/ALOX5AP/SNCA/CEBPA/HMOX1/RASA4/CAPN3/SLC40A1/FOS/RASGRP2	13	geneontology_Biological_Process	0.0180556	Up
GO:2000027	regulation of animal organ morphogenesis	16/720	254/18866	0.0348808	0.122424	0.0892619	ARRB2/CFLAR/CSF1/ENG/DAB2/CD34/JAG1/TGFBR2/PSMB9/SULF1/PLEKHA4/CHAD/LIF/MDK/HGF/AGT	16	geneontology_Biological_Process	0.0222222	Up
GO:0001937	negative regulation of endothelial cell proliferation	7/720	81/18866	0.0349058	0.122424	0.0892619	ALOX5/ACVRL1/PTPRM/VASH1/CCL2/APOE/SULF1	7	geneontology_Biological_Process	0.00972222	Up
GO:0033344	cholesterol efflux	6/720	64/18866	0.0349187	0.122424	0.0892619	ABCG1/NPC2/APOE/APOC1/PLTP/APOC2	6	geneontology_Biological_Process	0.00833333	Up
GO:0060135	maternal process involved in female pregnancy	6/720	64/18866	0.0349187	0.122424	0.0892619	LGALS9/HAVCR2/PLA2G6/SPP1/LIF/LDOC1	6	geneontology_Biological_Process	0.00833333	Up
GO:0010469	regulation of signaling receptor activity	12/720	174/18866	0.0350099	0.122652	0.0894286	CCR2/NCF1/PRKCD/PTK2B/FCGR2B/RAMP3/SHANK3/IL18BP/MINK1/CCL2/LDOC1/SHANK1	12	geneontology_Biological_Process	0.0166667	Up
GO:0045666	positive regulation of neuron differentiation	22/720	380/18866	0.0351504	0.123053	0.0897206	FES/CX3CL1/PTK2B/S100A9/PLXND1/SCARF1/CFLAR/SHANK3/GDPD5/TRPV2/APOE/SCN1B/SLIT2/CXCL12/SHTN1/NDRG4/GRN/SEMA7A/MDK/HGF/SHANK1/AGT	22	geneontology_Biological_Process	0.0305556	Up
GO:0031952	regulation of protein autophosphorylation	5/720	48/18866	0.0354042	0.123662	0.090165	PTPRC/RASSF2/ENG/PDGFB/MVP	5	geneontology_Biological_Process	0.00694444	Up
GO:1900271	regulation of long-term synaptic potentiation	5/720	48/18866	0.0354042	0.123662	0.090165	LILRB2/TYROBP/SHANK3/APOE/CX3CR1	5	geneontology_Biological_Process	0.00694444	Up
GO:0046578	regulation of Ras protein signal transduction	13/720	194/18866	0.0354248	0.123662	0.090165	RASAL3/RASA4B/RASGRP4/VAV1/CYTH4/PSD4/ARHGDIB/CSF1/SH3BP1/RASA4/F11R/APOE/LPAR6	13	geneontology_Biological_Process	0.0180556	Up
GO:0001666	response to hypoxia	21/720	359/18866	0.0354297	0.123662	0.090165	CYBB/PTK2B/CFLAR/ACVRL1/TLR2/UCP2/TEK/CD34/ADAM8/HMOX1/CST3/TGFBR2/ICAM1/CXCL12/RAMP2/EPAS1/PSMB9/CYBA/CYGB/PLAT/EGR1	21	geneontology_Biological_Process	0.0291667	Up
GO:0010039	response to iron ion	4/720	33/18866	0.0358161	0.124641	0.0908788	C1QA/SNCA/HMOX1/SLC40A1	4	geneontology_Biological_Process	0.00555556	Up
GO:0021988	olfactory lobe development	4/720	33/18866	0.0358161	0.124641	0.0908788	CSF1R/SLIT2/EXT1/SEMA7A	4	geneontology_Biological_Process	0.00555556	Up
GO:0035590	purinergic nucleotide receptor signaling pathway	4/720	33/18866	0.0358161	0.124641	0.0908788	GPR34/P2RY6/PTAFR/ADORA3	4	geneontology_Biological_Process	0.00555556	Up
GO:0043552	positive regulation of phosphatidylinositol 3-kinase activity	4/720	33/18866	0.0358161	0.124641	0.0908788	PTK2B/FGR/PDGFB/TEK	4	geneontology_Biological_Process	0.00555556	Up
GO:0033559	unsaturated fatty acid metabolic process	9/720	118/18866	0.0367993	0.127968	0.0933045	ALOX5/CD74/PTGS1/HPGDS/ALOX5AP/LTC4S/IL1B/GPX1/GSTM2	9	geneontology_Biological_Process	0.0125	Up
GO:0120193	tight junction organization	7/720	82/18866	0.0369606	0.128434	0.0936441	MICALL2/PRKCH/ESAM/F11R/CDH5/RAMP2/CLDN5	7	geneontology_Biological_Process	0.00972222	Up
GO:0010573	vascular endothelial growth factor production	6/720	65/18866	0.0372789	0.129349	0.0943115	CCR2/C3AR1/IL1B/C5AR1/C3/SULF1	6	geneontology_Biological_Process	0.00833333	Up
GO:0030837	negative regulation of actin filament polymerization	6/720	65/18866	0.0372789	0.129349	0.0943115	PRKCD/TRIOBP/CAPG/KANK3/SLIT2/SCIN	6	geneontology_Biological_Process	0.00833333	Up
GO:0070301	cellular response to hydrogen peroxide	8/720	100/18866	0.0373702	0.12957	0.0944728	RIPK3/TRPM2/PRKCD/SIRPA/MAPK13/PSAP/CST3/HGF	8	geneontology_Biological_Process	0.0111111	Up
GO:0010634	positive regulation of epithelial cell migration	12/720	176/18866	0.0377105	0.130654	0.0952627	PTK2B/STAT5A/PDGFB/TEK/HMOX1/CD40/TGFBR2/GRN/HYAL1/SMOC2/AGT/ITGB3	12	geneontology_Biological_Process	0.0166667	Up
GO:0009395	phospholipid catabolic process	5/720	49/18866	0.0382369	0.131992	0.0962382	PRKCD/PLA2G6/APOC1/PLA2G5/APOC2	5	geneontology_Biological_Process	0.00694444	Up
GO:0015695	organic cation transport	5/720	49/18866	0.0382369	0.131992	0.0962382	LILRB1/FCER1G/SNCA/MAOB/ITGB3	5	geneontology_Biological_Process	0.00694444	Up
GO:0034260	negative regulation of GTPase activity	5/720	49/18866	0.0382369	0.131992	0.0962382	ARRB2/GMIP/RASA4/F11R/SLIT2	5	geneontology_Biological_Process	0.00694444	Up
GO:0034656	nucleobase-containing small molecule catabolic process	5/720	49/18866	0.0382369	0.131992	0.0962382	ADA2/ENTPD1/TYMP/DPYD/GALT	5	geneontology_Biological_Process	0.00694444	Up
GO:0061383	trabecula morphogenesis	5/720	49/18866	0.0382369	0.131992	0.0962382	ENG/TEK/S1PR1/SLC40A1/CHAD	5	geneontology_Biological_Process	0.00694444	Up
GO:0043271	negative regulation of ion transport	11/720	157/18866	0.0384549	0.132647	0.096716	LILRB2/LILRB1/PTK2B/CD33/SLC43A2/SNCA/ICAM1/GABRE/MAOB/GSTM2/SFRP4	11	geneontology_Biological_Process	0.0152778	Up
GO:0048588	developmental cell growth	15/720	237/18866	0.0387827	0.133129	0.0970673	ARHGAP4/SEMA4A/SEMA3G/TRPV2/APOE/TGFBR2/SLIT2/CXCL12/SHTN1/SEMA7A/SPP1/SEMA4B/MAP2/SEMA6D/AGT	15	geneontology_Biological_Process	0.0208333	Up
GO:0002689	negative regulation of leukocyte chemotaxis	3/720	20/18866	0.0389058	0.133129	0.0970673	SLAMF8/CCL2/SLIT2	3	geneontology_Biological_Process	0.00416667	Up
GO:0010875	positive regulation of cholesterol efflux	3/720	20/18866	0.0389058	0.133129	0.0970673	ABCG1/APOE/PLTP	3	geneontology_Biological_Process	0.00416667	Up
GO:0032303	regulation of icosanoid secretion	3/720	20/18866	0.0389058	0.133129	0.0970673	IL1B/PLA2G6/TNFRSF11A	3	geneontology_Biological_Process	0.00416667	Up
GO:0032727	positive regulation of interferon-alpha production	3/720	20/18866	0.0389058	0.133129	0.0970673	IRF5/TLR4/IRF7	3	geneontology_Biological_Process	0.00416667	Up
GO:0045019	negative regulation of nitric oxide biosynthetic process	3/720	20/18866	0.0389058	0.133129	0.0970673	SIRPA/CD34/ACP5	3	geneontology_Biological_Process	0.00416667	Up
GO:0045056	transcytosis	3/720	20/18866	0.0389058	0.133129	0.0970673	FCGRT/PTAFR/GPIHBP1	3	geneontology_Biological_Process	0.00416667	Up
GO:0051767	nitric-oxide synthase biosynthetic process	3/720	20/18866	0.0389058	0.133129	0.0970673	TLR4/TLR2/CCL2	3	geneontology_Biological_Process	0.00416667	Up
GO:0051769	regulation of nitric-oxide synthase biosynthetic process	3/720	20/18866	0.0389058	0.133129	0.0970673	TLR4/TLR2/CCL2	3	geneontology_Biological_Process	0.00416667	Up
GO:0098703	calcium ion import across plasma membrane	3/720	20/18866	0.0389058	0.133129	0.0970673	TRPM2/RAMP3/TRPV2	3	geneontology_Biological_Process	0.00416667	Up
GO:1904406	negative regulation of nitric oxide metabolic process	3/720	20/18866	0.0389058	0.133129	0.0970673	SIRPA/CD34/ACP5	3	geneontology_Biological_Process	0.00416667	Up
GO:0071277	cellular response to calcium ion	7/720	83/18866	0.0390934	0.133673	0.0974644	TRPM2/RASA4B/ALOX5AP/RASA4/CAPN3/FOS/RASGRP2	7	geneontology_Biological_Process	0.00972222	Up
GO:0002792	negative regulation of peptide secretion	8/720	101/18866	0.0392885	0.134145	0.0978085	CD74/CD22/FCGR2B/IL1B/RHBDF1/APOE/SRGN/CD200	8	geneontology_Biological_Process	0.0111111	Up
GO:0007215	glutamate receptor signaling pathway	8/720	101/18866	0.0392885	0.134145	0.0978085	CCR2/CX3CL1/PTK2B/SULT1A4/SHANK3/MINK1/CCL2/SHANK1	8	geneontology_Biological_Process	0.0111111	Up
GO:0018149	peptide cross-linking	4/720	34/18866	0.0394086	0.134263	0.0978945	CSTA/F13A1/TGM2/EGFLAM	4	geneontology_Biological_Process	0.00555556	Up
GO:0035633	maintenance of blood-brain barrier	4/720	34/18866	0.0394086	0.134263	0.0978945	ESAM/F11R/CDH5/CLDN5	4	geneontology_Biological_Process	0.00555556	Up
GO:0035774	positive regulation of insulin secretion involved in cellular response to glucose stimulus	4/720	34/18866	0.0394086	0.134263	0.0978945	HLA-DRB1/PLA2G6/GPR68/SYBU	4	geneontology_Biological_Process	0.00555556	Up
GO:0016445	somatic diversification of immunoglobulins	6/720	66/18866	0.0397388	0.135192	0.098572	TNFSF13/PARP3/PTPRC/SAMHD1/CD40/BATF	6	geneontology_Biological_Process	0.00833333	Up
GO:0046824	positive regulation of nucleocytoplasmic transport	6/720	66/18866	0.0397388	0.135192	0.098572	HCLS1/PRKCD/IL1B/GAS6/HYAL2/RAPGEF3	6	geneontology_Biological_Process	0.00833333	Up
GO:0003044	regulation of systemic arterial blood pressure mediated by a chemical signal	5/720	50/18866	0.0412042	0.139673	0.101839	CPA3/GJA5/CYBA/CTSZ/AGT	5	geneontology_Biological_Process	0.00694444	Up
GO:0045646	regulation of erythrocyte differentiation	5/720	50/18866	0.0412042	0.139673	0.101839	INPP5D/NCKAP1L/SPI1/RHEX/ZFP36	5	geneontology_Biological_Process	0.00694444	Up
GO:0071715	icosanoid transport	5/720	50/18866	0.0412042	0.139673	0.101839	IL1B/SLCO2A1/PLA2G6/TNFRSF11A/PLA2G5	5	geneontology_Biological_Process	0.00694444	Up
GO:0097300	programmed necrotic cell death	5/720	50/18866	0.0412042	0.139673	0.101839	RIPK3/CD14/TLR4/CFLAR/LY96	5	geneontology_Biological_Process	0.00694444	Up
GO:1901571	fatty acid derivative transport	5/720	50/18866	0.0412042	0.139673	0.101839	IL1B/SLCO2A1/PLA2G6/TNFRSF11A/PLA2G5	5	geneontology_Biological_Process	0.00694444	Up
GO:0048864	stem cell development	7/720	84/18866	0.0413052	0.139914	0.102015	SEMA4A/PTPRC/SEMA3G/JAG1/SEMA7A/SEMA4B/SEMA6D	7	geneontology_Biological_Process	0.00972222	Up
GO:0006026	aminoglycan catabolic process	6/720	67/18866	0.0422992	0.14287	0.10417	FUCA1/HYAL2/IDUA/LYVE1/HYAL1/VCAN	6	geneontology_Biological_Process	0.00833333	Up
GO:0007040	lysosome organization	6/720	67/18866	0.0422992	0.14287	0.10417	CORO1A/MYO7A/GAA/RAB20/GRN/PLA2G5	6	geneontology_Biological_Process	0.00833333	Up
GO:0032890	regulation of organic acid transport	6/720	67/18866	0.0422992	0.14287	0.10417	SLC43A2/IL1B/ACSL5/PLA2G6/TNFRSF11A/AGT	6	geneontology_Biological_Process	0.00833333	Up
GO:0080171	lytic vacuole organization	6/720	67/18866	0.0422992	0.14287	0.10417	CORO1A/MYO7A/GAA/RAB20/GRN/PLA2G5	6	geneontology_Biological_Process	0.00833333	Up
GO:0071902	positive regulation of protein serine/threonine kinase activity	20/720	345/18866	0.0425736	0.143694	0.10477	FGD2/CD74/PTK2B/TLR4/PIK3R5/CSF1R/FAM20A/FPR1/PTPRC/IL1B/C5AR1/PDGFB/SNCA/ADAM8/TNFRSF11A/MAP4K1/CD40/TCIM/HGF/AGT	20	geneontology_Biological_Process	0.0277778	Up
GO:0007163	establishment or maintenance of cell polarity	14/720	220/18866	0.0431372	0.145491	0.106081	DOCK2/DOCK8/PTK2B/NCKAP1L/PARVG/SPINT2/CCL4/TEK/SH3BP1/RAC2/CDH5/SHTN1/TCIRG1/MAP2	14	geneontology_Biological_Process	0.0194444	Up
GO:0030513	positive regulation of BMP signaling pathway	4/720	35/18866	0.043199	0.145491	0.106081	ACVRL1/ENG/CDH5/SULF1	4	geneontology_Biological_Process	0.00555556	Up
GO:0060338	regulation of type I interferon-mediated signaling pathway	4/720	35/18866	0.043199	0.145491	0.106081	PTPN6/SAMHD1/NLRC5/IRF7	4	geneontology_Biological_Process	0.00555556	Up
GO:1901890	positive regulation of cell junction assembly	8/720	103/18866	0.0433195	0.145793	0.106301	SEMA4A/PTPRJ/TEK/CLSTN3/AMIGO2/CLDN5/AGT/COL16A1	8	geneontology_Biological_Process	0.0111111	Up
GO:0051054	positive regulation of DNA metabolic process	13/720	200/18866	0.0435077	0.146203	0.1066	WAS/TNFSF13/PARP3/HDAC10/PRKCD/PTK2B/ARRB2/PTPRC/PDGFB/CD40/PKIB/HGF/SMOC2	13	geneontology_Biological_Process	0.0180556	Up
GO:0010507	negative regulation of autophagy	7/720	85/18866	0.0435967	0.146203	0.1066	IL10RA/TREM2/SNCA/PTPN22/HMOX1/NRBP2/HGF	7	geneontology_Biological_Process	0.00972222	Up
GO:0032092	positive regulation of protein binding	7/720	85/18866	0.0435967	0.146203	0.1066	MFNG/PLXND1/APOE/HOXA3/RAMP2/LFNG/CLDN5	7	geneontology_Biological_Process	0.00972222	Up
GO:0043297	apical junction assembly	7/720	85/18866	0.0435967	0.146203	0.1066	MICALL2/PRKCH/ESAM/F11R/CDH5/RAMP2/CLDN5	7	geneontology_Biological_Process	0.00972222	Up
GO:0070509	calcium ion import	7/720	85/18866	0.0435967	0.146203	0.1066	TRPM2/RAMP3/PDGFB/TRPV2/CCL2/CXCL12/CCL3	7	geneontology_Biological_Process	0.00972222	Up
GO:0032355	response to estradiol	10/720	141/18866	0.0438658	0.146564	0.106863	CD4/RAMP3/CFLAR/GGT7/ARPC1B/CST3/RAMP2/GGT5/CCN2/AGT	10	geneontology_Biological_Process	0.0138889	Up
GO:0045471	response to ethanol	9/720	122/18866	0.0440239	0.146564	0.106863	CYBB/CD14/PTK2B/SPI1/CD27/ICAM1/MAOB/S100A8/BGLAP	9	geneontology_Biological_Process	0.0125	Up
GO:0030220	platelet formation	3/720	21/18866	0.0441406	0.146564	0.106863	PTPN6/NBEAL2/ZNF385A	3	geneontology_Biological_Process	0.00416667	Up
GO:0032516	positive regulation of phosphoprotein phosphatase activity	3/720	21/18866	0.0441406	0.146564	0.106863	CD33/PTPRC/CD300A	3	geneontology_Biological_Process	0.00416667	Up
GO:0035455	response to interferon-alpha	3/720	21/18866	0.0441406	0.146564	0.106863	GAS6/IFITM2/BST2	3	geneontology_Biological_Process	0.00416667	Up
GO:0043691	reverse cholesterol transport	3/720	21/18866	0.0441406	0.146564	0.106863	ABCG1/APOE/APOC2	3	geneontology_Biological_Process	0.00416667	Up
GO:0046827	positive regulation of protein export from nucleus	3/720	21/18866	0.0441406	0.146564	0.106863	IL1B/GAS6/RAPGEF3	3	geneontology_Biological_Process	0.00416667	Up
GO:0060713	labyrinthine layer morphogenesis	3/720	21/18866	0.0441406	0.146564	0.106863	SPINT2/ST14/SOCS3	3	geneontology_Biological_Process	0.00416667	Up
GO:0061042	vascular wound healing	3/720	21/18866	0.0441406	0.146564	0.106863	ALOX5/CD34/SMOC2	3	geneontology_Biological_Process	0.00416667	Up
GO:0072111	cell proliferation involved in kidney development	3/720	21/18866	0.0441406	0.146564	0.106863	CFLAR/PDGFB/EGR1	3	geneontology_Biological_Process	0.00416667	Up
GO:0090201	negative regulation of release of cytochrome c from mitochondria	3/720	21/18866	0.0441406	0.146564	0.106863	ARRB2/GPX1/HGF	3	geneontology_Biological_Process	0.00416667	Up
GO:0090330	regulation of platelet aggregation	3/720	21/18866	0.0441406	0.146564	0.106863	PRKCD/SH2B3/F11R	3	geneontology_Biological_Process	0.00416667	Up
GO:0099515	actin filament-based transport	3/720	21/18866	0.0441406	0.146564	0.106863	MYO1F/MYO7A/MYO1G	3	geneontology_Biological_Process	0.00416667	Up
GO:1902656	calcium ion import into cytosol	3/720	21/18866	0.0441406	0.146564	0.106863	TRPM2/RAMP3/TRPV2	3	geneontology_Biological_Process	0.00416667	Up
GO:0002204	somatic recombination of immunoglobulin genes involved in immune response	5/720	51/18866	0.0443069	0.146599	0.106889	TNFSF13/PARP3/PTPRC/CD40/BATF	5	geneontology_Biological_Process	0.00694444	Up
GO:0002208	somatic diversification of immunoglobulins involved in immune response	5/720	51/18866	0.0443069	0.146599	0.106889	TNFSF13/PARP3/PTPRC/CD40/BATF	5	geneontology_Biological_Process	0.00694444	Up
GO:0045190	isotype switching	5/720	51/18866	0.0443069	0.146599	0.106889	TNFSF13/PARP3/PTPRC/CD40/BATF	5	geneontology_Biological_Process	0.00694444	Up
GO:0071354	cellular response to interleukin-6	5/720	51/18866	0.0443069	0.146599	0.106889	SPI1/SELPLG/CEBPA/ICAM1/SOCS3	5	geneontology_Biological_Process	0.00694444	Up
GO:1902893	regulation of pri-miRNA transcription by RNA polymerase II	5/720	51/18866	0.0443069	0.146599	0.106889	LILRB4/SPI1/PDGFB/FOS/EGR1	5	geneontology_Biological_Process	0.00694444	Up
GO:0071241	cellular response to inorganic substance	14/720	221/18866	0.0445164	0.147189	0.107319	TRPM2/NCF1/RASA4B/CYBB/ALOX5AP/CFLAR/SNCA/CEBPA/HMOX1/RASA4/CAPN3/SLC40A1/FOS/RASGRP2	14	geneontology_Biological_Process	0.0194444	Up
GO:0031333	negative regulation of protein-containing complex assembly	10/720	142/18866	0.0456533	0.150842	0.109982	TMC8/PRKCD/TRIOBP/CAPG/SNCA/KANK3/CDH5/SLIT2/MAP2/SCIN	10	geneontology_Biological_Process	0.0138889	Up
GO:0045445	myoblast differentiation	7/720	86/18866	0.0459686	0.151777	0.110664	IL18/CXCL10/JAG1/CAPN3/EPAS1/CXCL9/BOC	7	geneontology_Biological_Process	0.00972222	Up
GO:0043406	positive regulation of MAP kinase activity	16/720	264/18866	0.0467791	0.154345	0.112536	FGD2/CD74/PTK2B/TLR4/PIK3R5/FPR1/PTPRC/IL1B/C5AR1/PDGFB/ADAM8/TNFRSF11A/MAP4K1/CD40/HGF/AGT	16	geneontology_Biological_Process	0.0222222	Up
GO:1905332	positive regulation of morphogenesis of an epithelium	4/720	36/18866	0.0471871	0.155582	0.113438	ITGAX/LIF/MDK/AGT	4	geneontology_Biological_Process	0.00555556	Up
GO:0035296	regulation of tube diameter	10/720	143/18866	0.0474893	0.156359	0.114005	PTAFR/PLA2G6/GJA5/PTPRM/HMOX1/APOE/ICAM1/GPX1/ACTA2/AGT	10	geneontology_Biological_Process	0.0138889	Up
GO:0097746	regulation of blood vessel diameter	10/720	143/18866	0.0474893	0.156359	0.114005	PTAFR/PLA2G6/GJA5/PTPRM/HMOX1/APOE/ICAM1/GPX1/ACTA2/AGT	10	geneontology_Biological_Process	0.0138889	Up
GO:0032330	regulation of chondrocyte differentiation	5/720	52/18866	0.0475458	0.156436	0.114061	ACVRL1/LTBP3/CCN2/MDK/SCIN	5	geneontology_Biological_Process	0.00694444	Up
GO:0042698	ovulation cycle	6/720	69/18866	0.047725	0.156806	0.114331	ARRB2/SLIT2/MMP19/MDK/EGR1/PTX3	6	geneontology_Biological_Process	0.00833333	Up
GO:2000573	positive regulation of DNA biosynthetic process	6/720	69/18866	0.047725	0.156806	0.114331	PTK2B/ARRB2/PDGFB/PKIB/HGF/SMOC2	6	geneontology_Biological_Process	0.00833333	Up
GO:0033002	muscle cell proliferation	15/720	244/18866	0.0478899	0.157238	0.114646	AIF1/P2RY6/IL18/CX3CL1/PTAFR/CFLAR/PDGFB/HMOX1/S1PR1/TGFBR2/CYBA/NDRG4/TGM2/CCL5/AGT	15	geneontology_Biological_Process	0.0208333	Up
GO:0022612	gland morphogenesis	9/720	124/18866	0.0479691	0.157388	0.114755	CSF1R/PLXND1/CFLAR/CSF1/TGFBR2/SULF1/TGM2/MDK/HGF	9	geneontology_Biological_Process	0.0125	Up
GO:0060291	long-term synaptic potentiation	7/720	87/18866	0.0484216	0.158762	0.115757	LILRB2/PTK2B/TYROBP/SHANK3/APOE/CX3CR1/SHANK1	7	geneontology_Biological_Process	0.00972222	Up
GO:0031346	positive regulation of cell projection organization	22/720	394/18866	0.0488889	0.160183	0.116793	FES/CX3CL1/PTK2B/S100A9/PLXND1/SCARF1/CFLAR/SHANK3/RAC2/TRPV2/APOE/SCN1B/SLIT2/CXCL12/SHTN1/NDRG4/GRN/SEMA7A/MDK/HGF/SHANK1/AGT	22	geneontology_Biological_Process	0.0305556	Up
GO:0035150	regulation of tube size	10/720	144/18866	0.0493744	0.161661	0.117871	PTAFR/PLA2G6/GJA5/PTPRM/HMOX1/APOE/ICAM1/GPX1/ACTA2/AGT	10	geneontology_Biological_Process	0.0138889	Up
GO:0001779	natural killer cell differentiation	3/720	22/18866	0.0497061	0.161958	0.118087	PTPRC/GAS6/MERTK	3	geneontology_Biological_Process	0.00416667	Up
GO:0006925	inflammatory cell apoptotic process	3/720	22/18866	0.0497061	0.161958	0.118087	CCR5/IRF7/CCL5	3	geneontology_Biological_Process	0.00416667	Up
GO:0032700	negative regulation of interleukin-17 production	3/720	22/18866	0.0497061	0.161958	0.118087	VSIR/TLR4/NCKAP1L	3	geneontology_Biological_Process	0.00416667	Up
GO:0033005	positive regulation of mast cell activation	3/720	22/18866	0.0497061	0.161958	0.118087	FGR/VAMP8/FCER1G	3	geneontology_Biological_Process	0.00416667	Up
GO:0036344	platelet morphogenesis	3/720	22/18866	0.0497061	0.161958	0.118087	PTPN6/NBEAL2/ZNF385A	3	geneontology_Biological_Process	0.00416667	Up
GO:1901685	glutathione derivative metabolic process	3/720	22/18866	0.0497061	0.161958	0.118087	HPGDS/GSTM2/GSTM5	3	geneontology_Biological_Process	0.00416667	Up
GO:1901687	glutathione derivative biosynthetic process	3/720	22/18866	0.0497061	0.161958	0.118087	HPGDS/GSTM2/GSTM5	3	geneontology_Biological_Process	0.00416667	Up
GO:0030038	contractile actin filament bundle assembly	8/720	106/18866	0.049862	0.162241	0.118294	WAS/PTK2B/ZYX/RAPGEF3/F11R/ARHGEF15/S1PR1/CCN2	8	geneontology_Biological_Process	0.0111111	Up
GO:0043149	stress fiber assembly	8/720	106/18866	0.049862	0.162241	0.118294	WAS/PTK2B/ZYX/RAPGEF3/F11R/ARHGEF15/S1PR1/CCN2	8	geneontology_Biological_Process	0.0111111	Up
GO:0072330	monocarboxylic acid biosynthetic process	15/720	246/18866	0.0507463	0.164889	0.120225	ALOX5/CD74/PTGS1/HPGDS/ALOX5AP/LTC4S/IL1B/HSD3B7/SLC45A3/ACCS/SDS/APOC1/GSTM2/APOC2/VCAN	15	geneontology_Biological_Process	0.0208333	Up
GO:0032964	collagen biosynthetic process	5/720	53/18866	0.0509212	0.164889	0.120225	CIITA/ARRB2/ENG/CYGB/CCN2	5	geneontology_Biological_Process	0.00694444	Up
GO:0045010	actin nucleation	5/720	53/18866	0.0509212	0.164889	0.120225	WAS/CORO1A/ARPC1B/GMFG/SCIN	5	geneontology_Biological_Process	0.00694444	Up
GO:0045661	regulation of myoblast differentiation	5/720	53/18866	0.0509212	0.164889	0.120225	IL18/CXCL10/CAPN3/CXCL9/BOC	5	geneontology_Biological_Process	0.00694444	Up
GO:0045744	negative regulation of G protein-coupled receptor signaling pathway	5/720	53/18866	0.0509212	0.164889	0.120225	PLEK/ARRB2/APLNR/SNCA/CCL5	5	geneontology_Biological_Process	0.00694444	Up
GO:0061614	pri-miRNA transcription by RNA polymerase II	5/720	53/18866	0.0509212	0.164889	0.120225	LILRB4/SPI1/PDGFB/FOS/EGR1	5	geneontology_Biological_Process	0.00694444	Up
GO:1900024	regulation of substrate adhesion-dependent cell spreading	5/720	53/18866	0.0509212	0.164889	0.120225	TRIOBP/UNC13D/NEDD9/MDK/GBP1	5	geneontology_Biological_Process	0.00694444	Up
GO:0070482	response to oxygen levels	22/720	396/18866	0.0511293	0.165449	0.120633	CYBB/PTK2B/CFLAR/ACVRL1/TLR2/UCP2/TEK/CD34/ADAM8/HMOX1/CST3/TGFBR2/ICAM1/CXCL12/RAMP2/EPAS1/PSMB9/CYBA/CYGB/PLAT/CCN2/EGR1	22	geneontology_Biological_Process	0.0305556	Up
GO:0045191	regulation of isotype switching	4/720	37/18866	0.0513723	0.165779	0.120874	TNFSF13/PARP3/PTPRC/CD40	4	geneontology_Biological_Process	0.00555556	Up
GO:0090218	positive regulation of lipid kinase activity	4/720	37/18866	0.0513723	0.165779	0.120874	PTK2B/FGR/PDGFB/TEK	4	geneontology_Biological_Process	0.00555556	Up
GO:1905314	semi-lunar valve development	4/720	37/18866	0.0513723	0.165779	0.120874	TNFRSF1B/GJA5/JAG1/SLIT2	4	geneontology_Biological_Process	0.00555556	Up
GO:2000273	positive regulation of signaling receptor activity	4/720	37/18866	0.0513723	0.165779	0.120874	CCR2/NCF1/SHANK3/CCL2	4	geneontology_Biological_Process	0.00555556	Up
GO:0018105	peptidyl-serine phosphorylation	18/720	310/18866	0.051677	0.166559	0.121442	HCLS1/PRKCD/ARRB2/RAMP3/SH2D3C/GAS6/OSM/RASSF2/PRKCH/SGK1/PDGFB/RAPGEF3/MAPK13/SNCA/MAP4K1/TGFBR2/LIF/HGF	18	geneontology_Biological_Process	0.025	Up
GO:2001257	regulation of cation channel activity	12/720	185/18866	0.0516846	0.166559	0.121442	CCR2/P2RY6/CTSS/PTK2B/TREM2/SHANK3/PLA2G6/MINK1/CCL2/SCN1B/GSTM2/SHANK1	12	geneontology_Biological_Process	0.0166667	Up
GO:0001660	fever generation	2/720	10/18866	0.0534155	0.168756	0.123044	IL1B/TNFRSF11A	2	geneontology_Biological_Process	0.00277778	Up
GO:0001865	NK T cell differentiation	2/720	10/18866	0.0534155	0.168756	0.123044	PSAP/TGFBR2	2	geneontology_Biological_Process	0.00277778	Up
GO:0006655	phosphatidylglycerol biosynthetic process	2/720	10/18866	0.0534155	0.168756	0.123044	PLA2G6/TAZ	2	geneontology_Biological_Process	0.00277778	Up
GO:0010269	response to selenium ion	2/720	10/18866	0.0534155	0.168756	0.123044	GPX1/MAOB	2	geneontology_Biological_Process	0.00277778	Up
GO:0019614	catechol-containing compound catabolic process	2/720	10/18866	0.0534155	0.168756	0.123044	SULT1A4/MAOB	2	geneontology_Biological_Process	0.00277778	Up
GO:0032070	regulation of deoxyribonuclease activity	2/720	10/18866	0.0534155	0.168756	0.123044	PRKCD/GZMA	2	geneontology_Biological_Process	0.00277778	Up
GO:0032308	positive regulation of prostaglandin secretion	2/720	10/18866	0.0534155	0.168756	0.123044	IL1B/TNFRSF11A	2	geneontology_Biological_Process	0.00277778	Up
GO:0032661	regulation of interleukin-18 production	2/720	10/18866	0.0534155	0.168756	0.123044	TLR2/CD84	2	geneontology_Biological_Process	0.00277778	Up
GO:0032815	negative regulation of natural killer cell activation	2/720	10/18866	0.0534155	0.168756	0.123044	FGR/HAVCR2	2	geneontology_Biological_Process	0.00277778	Up
GO:0034135	regulation of toll-like receptor 2 signaling pathway	2/720	10/18866	0.0534155	0.168756	0.123044	TLR1/CYBA	2	geneontology_Biological_Process	0.00277778	Up
GO:0035907	dorsal aorta development	2/720	10/18866	0.0534155	0.168756	0.123044	ACVRL1/ENG	2	geneontology_Biological_Process	0.00277778	Up
GO:0039530	MDA-5 signaling pathway	2/720	10/18866	0.0534155	0.168756	0.123044	DHX58/IRF7	2	geneontology_Biological_Process	0.00277778	Up
GO:0042117	monocyte activation	2/720	10/18866	0.0534155	0.168756	0.123044	HYAL2/CSF1	2	geneontology_Biological_Process	0.00277778	Up
GO:0042424	catecholamine catabolic process	2/720	10/18866	0.0534155	0.168756	0.123044	SULT1A4/MAOB	2	geneontology_Biological_Process	0.00277778	Up
GO:0044351	macropinocytosis	2/720	10/18866	0.0534155	0.168756	0.123044	DOCK2/PYCARD	2	geneontology_Biological_Process	0.00277778	Up
GO:0045348	positive regulation of MHC class II biosynthetic process	2/720	10/18866	0.0534155	0.168756	0.123044	CIITA/TLR4	2	geneontology_Biological_Process	0.00277778	Up
GO:0048251	elastic fiber assembly	2/720	10/18866	0.0534155	0.168756	0.123044	MYH11/LTBP3	2	geneontology_Biological_Process	0.00277778	Up
GO:0048304	positive regulation of isotype switching to IgG isotypes	2/720	10/18866	0.0534155	0.168756	0.123044	PTPRC/CD40	2	geneontology_Biological_Process	0.00277778	Up
GO:0050861	positive regulation of B cell receptor signaling pathway	2/720	10/18866	0.0534155	0.168756	0.123044	NFAM1/PRKCH	2	geneontology_Biological_Process	0.00277778	Up
GO:0051124	synaptic growth at neuromuscular junction	2/720	10/18866	0.0534155	0.168756	0.123044	SHANK3/SHANK1	2	geneontology_Biological_Process	0.00277778	Up
GO:0070314	G1 to G0 transition	2/720	10/18866	0.0534155	0.168756	0.123044	CAPN3/ECRG4	2	geneontology_Biological_Process	0.00277778	Up
GO:0070424	regulation of nucleotide-binding oligomerization domain containing signaling pathway	2/720	10/18866	0.0534155	0.168756	0.123044	TLR4/PTPN22	2	geneontology_Biological_Process	0.00277778	Up
GO:0090037	positive regulation of protein kinase C signaling	2/720	10/18866	0.0534155	0.168756	0.123044	PLA2G6/CD40	2	geneontology_Biological_Process	0.00277778	Up
GO:0090385	phagosome-lysosome fusion	2/720	10/18866	0.0534155	0.168756	0.123044	RAB20/PLA2G5	2	geneontology_Biological_Process	0.00277778	Up
GO:0097278	complement-dependent cytotoxicity	2/720	10/18866	0.0534155	0.168756	0.123044	C3/CFH	2	geneontology_Biological_Process	0.00277778	Up
GO:1901748	leukotriene D4 metabolic process	2/720	10/18866	0.0534155	0.168756	0.123044	GGT7/GGT5	2	geneontology_Biological_Process	0.00277778	Up
GO:1901750	leukotriene D4 biosynthetic process	2/720	10/18866	0.0534155	0.168756	0.123044	GGT7/GGT5	2	geneontology_Biological_Process	0.00277778	Up
GO:1902023	L-arginine transport	2/720	10/18866	0.0534155	0.168756	0.123044	SLC11A1/AGT	2	geneontology_Biological_Process	0.00277778	Up
GO:2001225	regulation of chloride transport	2/720	10/18866	0.0534155	0.168756	0.123044	PTAFR/GABRE	2	geneontology_Biological_Process	0.00277778	Up
GO:1901653	cellular response to peptide	22/720	398/18866	0.0534424	0.168756	0.123044	PRKCD/TLR4/FCGR2B/STAT5A/JAK3/ADCY4/CFLAR/TREM2/IL1B/PTPRE/TNS2/PTPN22/ICAM1/CYBA/SOCS3/TCIRG1/VCAM1/MZB1/BGLAP/LDOC1/AGT/ATP6V0D2	22	geneontology_Biological_Process	0.0305556	Up
GO:0014823	response to activity	6/720	71/18866	0.0535615	0.168942	0.12318	TNS2/COL4A2/CAPN3/CYBA/BGLAP/AGT	6	geneontology_Biological_Process	0.00833333	Up
GO:0008625	extrinsic apoptotic signaling pathway via death domain receptors	7/720	89/18866	0.0535732	0.168942	0.12318	TMC8/CFLAR/HMOX1/ICAM1/GPX1/TNFSF10/HGF	7	geneontology_Biological_Process	0.00972222	Up
GO:0018209	peptidyl-serine modification	19/720	333/18866	0.0536846	0.16918	0.123353	HCLS1/PRKCD/ARRB2/RAMP3/SH2D3C/GAS6/OSM/RASSF2/PRKCH/SGK1/PDGFB/RAPGEF3/MAPK13/SNCA/MAP4K1/TGFBR2/LIF/HGF/EGFLAM	19	geneontology_Biological_Process	0.0263889	Up
GO:0030834	regulation of actin filament depolymerization	5/720	54/18866	0.0544335	0.171425	0.12499	PLEK/TRIOBP/CAPG/SH3BP1/SCIN	5	geneontology_Biological_Process	0.00694444	Up
GO:0046890	regulation of lipid biosynthetic process	13/720	207/18866	0.0544718	0.171431	0.124995	CD74/PRKCD/ABCG1/IL1B/PLA2G6/PDGFB/APOE/SLC45A3/IGFBP7/C3/APOC1/APOC2/EGR1	13	geneontology_Biological_Process	0.0180556	Up
GO:0008593	regulation of Notch signaling pathway	8/720	108/18866	0.0545608	0.171597	0.125115	MFNG/EGFL7/ARRDC1/NOTCH4/GDPD5/JAG1/TCIM/LFNG	8	geneontology_Biological_Process	0.0111111	Up
GO:0032409	regulation of transporter activity	17/720	291/18866	0.0548411	0.172363	0.125674	CCR2/PRKCD/P2RY6/PTAFR/CTSS/PTK2B/TREM2/SHANK3/PLA2G6/SGK1/SNCA/MINK1/CCL2/SCN1B/GSTM2/HSPA2/SHANK1	17	geneontology_Biological_Process	0.0236111	Up
GO:0031639	plasminogen activation	3/720	23/18866	0.0555954	0.173805	0.126725	CLEC3B/CTSZ/PLAT	3	geneontology_Biological_Process	0.00416667	Up
GO:0035743	CD4-positive, alpha-beta T cell cytokine production	3/720	23/18866	0.0555954	0.173805	0.126725	IL18/NLRP3/IL1B	3	geneontology_Biological_Process	0.00416667	Up
GO:0048714	positive regulation of oligodendrocyte differentiation	3/720	23/18866	0.0555954	0.173805	0.126725	TNFRSF1B/TLR2/MDK	3	geneontology_Biological_Process	0.00416667	Up
GO:0060445	branching involved in salivary gland morphogenesis	3/720	23/18866	0.0555954	0.173805	0.126725	PLXND1/TGM2/HGF	3	geneontology_Biological_Process	0.00416667	Up
GO:0072010	glomerular epithelium development	3/720	23/18866	0.0555954	0.173805	0.126725	CD34/JAG1/PODXL	3	geneontology_Biological_Process	0.00416667	Up
GO:0072215	regulation of metanephros development	3/720	23/18866	0.0555954	0.173805	0.126725	PDGFB/LIF/EGR1	3	geneontology_Biological_Process	0.00416667	Up
GO:2000050	regulation of non-canonical Wnt signaling pathway	3/720	23/18866	0.0555954	0.173805	0.126725	DAB2/PLEKHA4/SFRP4	3	geneontology_Biological_Process	0.00416667	Up
GO:2000810	regulation of bicellular tight junction assembly	3/720	23/18866	0.0555954	0.173805	0.126725	PRKCH/F11R/CLDN5	3	geneontology_Biological_Process	0.00416667	Up
GO:0014912	negative regulation of smooth muscle cell migration	4/720	38/18866	0.0557535	0.173837	0.126749	AIF1/SLIT2/NDRG4/SEMA6D	4	geneontology_Biological_Process	0.00555556	Up
GO:0045923	positive regulation of fatty acid metabolic process	4/720	38/18866	0.0557535	0.173837	0.126749	CD74/IL1B/SLC45A3/APOC2	4	geneontology_Biological_Process	0.00555556	Up
GO:0071276	cellular response to cadmium ion	4/720	38/18866	0.0557535	0.173837	0.126749	NCF1/CYBB/HMOX1/FOS	4	geneontology_Biological_Process	0.00555556	Up
GO:1900026	positive regulation of substrate adhesion-dependent cell spreading	4/720	38/18866	0.0557535	0.173837	0.126749	TRIOBP/UNC13D/NEDD9/MDK	4	geneontology_Biological_Process	0.00555556	Up
GO:0006029	proteoglycan metabolic process	7/720	90/18866	0.0562727	0.17534	0.127844	GAL3ST4/IDUA/EXT1/SULF1/HYAL1/VCAN/EGFLAM	7	geneontology_Biological_Process	0.00972222	Up
GO:0061035	regulation of cartilage development	6/720	72/18866	0.0566351	0.176352	0.128582	ACVRL1/LTBP3/CCN2/MDK/SCIN/CTSK	6	geneontology_Biological_Process	0.00833333	Up
GO:0048762	mesenchymal cell differentiation	14/720	229/18866	0.056678	0.176369	0.128595	SEMA4A/AKNA/IL1B/SEMA3G/ENG/DAB2/NOTCH4/JAG1/TGFBR2/SEMA7A/SEMA4B/MDK/HGF/SEMA6D	14	geneontology_Biological_Process	0.0194444	Up
GO:2000278	regulation of DNA biosynthetic process	8/720	109/18866	0.0570126	0.177243	0.129232	PARP3/PTK2B/ARRB2/ACVRL1/PDGFB/PKIB/HGF/SMOC2	8	geneontology_Biological_Process	0.0111111	Up
GO:0031345	negative regulation of cell projection organization	12/720	188/18866	0.0570343	0.177243	0.129232	ARHGAP4/PRKCD/SEMA4A/SEMA3G/APOE/SLIT2/SEMA7A/CTSZ/SPP1/SEMA4B/MAP2/SEMA6D	12	geneontology_Biological_Process	0.0166667	Up
GO:0007156	homophilic cell adhesion via plasma membrane adhesion molecules	11/720	168/18866	0.0574991	0.17857	0.130199	PCDH1/IGSF21/PTPRM/CLSTN3/ESAM/ROBO4/AMIGO2/CDH5/EMB/PCDHGB7/CD84	11	geneontology_Biological_Process	0.0152778	Up
GO:0042304	regulation of fatty acid biosynthetic process	5/720	55/18866	0.0580825	0.180144	0.131347	CD74/IL1B/SLC45A3/APOC1/APOC2	5	geneontology_Biological_Process	0.00694444	Up
GO:0070741	response to interleukin-6	5/720	55/18866	0.0580825	0.180144	0.131347	SPI1/SELPLG/CEBPA/ICAM1/SOCS3	5	geneontology_Biological_Process	0.00694444	Up
GO:0043534	blood vessel endothelial cell migration	12/720	189/18866	0.0588969	0.182549	0.133101	PTK2B/STAT5A/ACVRL1/PDGFB/VASH1/SH3BP1/HMOX1/APOE/CD40/CDH5/SLIT2/GPX1	12	geneontology_Biological_Process	0.0166667	Up
GO:0015914	phospholipid transport	7/720	91/18866	0.0590551	0.182919	0.133371	PRKCD/ABCG1/NPC2/APOE/APOC1/PLTP/APOC2	7	geneontology_Biological_Process	0.00972222	Up
GO:0043434	response to peptide hormone	24/720	447/18866	0.0592068	0.183269	0.133625	CYBB/PRKCD/STAT5A/JAK3/ADCY4/CFLAR/IL1B/HHEX/TLR2/PTPRE/TEK/TNS2/ICAM1/CXCL12/CYBA/SOCS3/TCIRG1/MZB1/BGLAP/TNFSF10/CCN2/EGR1/AGT/ATP6V0D2	24	geneontology_Biological_Process	0.0333333	Up
GO:0051100	negative regulation of binding	11/720	169/18866	0.0594926	0.184032	0.134182	TMC8/PRKCD/ARRB2/DAB2/PDGFB/HMOX1/ATP2A3/CTSZ/MAP2/SLPI/GZMA	11	geneontology_Biological_Process	0.0152778	Up
GO:0051966	regulation of synaptic transmission, glutamatergic	6/720	73/18866	0.0598125	0.1849	0.134815	CCR2/PTK2B/SHANK3/PLA2G6/CCL2/SHANK1	6	geneontology_Biological_Process	0.00833333	Up
GO:0001649	osteoblast differentiation	14/720	231/18866	0.0600407	0.185483	0.13524	RASSF2/CLEC5A/CEBPA/JAG1/PDLIM7/SEMA7A/CCL3/SPP1/TCIRG1/BGLAP/HGF/VCAN/SMOC1/ITGA11	14	geneontology_Biological_Process	0.0194444	Up
GO:0001825	blastocyst formation	4/720	39/18866	0.0603295	0.185644	0.135358	MFNG/SOX17/PTPN18/TM4SF1	4	geneontology_Biological_Process	0.00555556	Up
GO:0007431	salivary gland development	4/720	39/18866	0.0603295	0.185644	0.135358	PLXND1/CST3/TGM2/HGF	4	geneontology_Biological_Process	0.00555556	Up
GO:0030204	chondroitin sulfate metabolic process	4/720	39/18866	0.0603295	0.185644	0.135358	IDUA/HYAL1/VCAN/EGFLAM	4	geneontology_Biological_Process	0.00555556	Up
GO:0055069	zinc ion homeostasis	4/720	39/18866	0.0603295	0.185644	0.135358	TMC8/LCK/S100A9/S100A8	4	geneontology_Biological_Process	0.00555556	Up
GO:0055090	acylglycerol homeostasis	4/720	39/18866	0.0603295	0.185644	0.135358	IL18/GPIHBP1/APOE/APOC2	4	geneontology_Biological_Process	0.00555556	Up
GO:0070328	triglyceride homeostasis	4/720	39/18866	0.0603295	0.185644	0.135358	IL18/GPIHBP1/APOE/APOC2	4	geneontology_Biological_Process	0.00555556	Up
GO:1903829	positive regulation of cellular protein localization	19/720	338/18866	0.0604383	0.185858	0.135513	ITGAM/HCLS1/PRKCD/EDEM2/ITGB2/TYROBP/RAMP3/TREM2/IL1B/FCER1G/GAS6/HYAL2/MICALL2/PRKCH/CD247/RAPGEF3/RAC2/GPR137B/LIF	19	geneontology_Biological_Process	0.0263889	Up
GO:0014850	response to muscle activity	3/720	24/18866	0.0618	0.189388	0.138087	TNS2/CAPN3/AGT	3	geneontology_Biological_Process	0.00416667	Up
GO:0045954	positive regulation of natural killer cell mediated cytotoxicity	3/720	24/18866	0.0618	0.189388	0.138087	VAV1/HLA-E/LAG3	3	geneontology_Biological_Process	0.00416667	Up
GO:0051004	regulation of lipoprotein lipase activity	3/720	24/18866	0.0618	0.189388	0.138087	GPIHBP1/APOC1/APOC2	3	geneontology_Biological_Process	0.00416667	Up
GO:0001755	neural crest cell migration	5/720	56/18866	0.0618681	0.189388	0.138087	SEMA4A/SEMA3G/SEMA7A/SEMA4B/SEMA6D	5	geneontology_Biological_Process	0.00694444	Up
GO:0010332	response to gamma radiation	5/720	56/18866	0.0618681	0.189388	0.138087	PTPRC/CXCL10/GPX1/CYBA/EGR1	5	geneontology_Biological_Process	0.00694444	Up
GO:0016447	somatic recombination of immunoglobulin gene segments	5/720	56/18866	0.0618681	0.189388	0.138087	TNFSF13/PARP3/PTPRC/CD40/BATF	5	geneontology_Biological_Process	0.00694444	Up
GO:0090183	regulation of kidney development	5/720	56/18866	0.0618681	0.189388	0.138087	CFLAR/PDGFB/LIF/EGR1/AGT	5	geneontology_Biological_Process	0.00694444	Up
GO:0007188	adenylate cyclase-modulating G protein-coupled receptor signaling pathway	14/720	233/18866	0.0635356	0.190693	0.139039	FPR1/RAMP3/GNA15/ADCY4/ADGRE2/PSAP/CXCL10/S1PR1/MARCO/RAMP2/GNG2/RGS1/CXCL9/CXCL11	14	geneontology_Biological_Process	0.0194444	Up
GO:0005984	disaccharide metabolic process	2/720	11/18866	0.0636724	0.190693	0.139039	IDUA/GAA	2	geneontology_Biological_Process	0.00277778	Up
GO:0006707	cholesterol catabolic process	2/720	11/18866	0.0636724	0.190693	0.139039	SCARF1/APOE	2	geneontology_Biological_Process	0.00277778	Up
GO:0006751	glutathione catabolic process	2/720	11/18866	0.0636724	0.190693	0.139039	GGT7/GGT5	2	geneontology_Biological_Process	0.00277778	Up
GO:0010739	positive regulation of protein kinase A signaling	2/720	11/18866	0.0636724	0.190693	0.139039	RAMP3/TCIM	2	geneontology_Biological_Process	0.00277778	Up
GO:0016127	sterol catabolic process	2/720	11/18866	0.0636724	0.190693	0.139039	SCARF1/APOE	2	geneontology_Biological_Process	0.00277778	Up
GO:0019371	cyclooxygenase pathway	2/720	11/18866	0.0636724	0.190693	0.139039	PTGS1/HPGDS	2	geneontology_Biological_Process	0.00277778	Up
GO:0031652	positive regulation of heat generation	2/720	11/18866	0.0636724	0.190693	0.139039	IL1B/TNFRSF11A	2	geneontology_Biological_Process	0.00277778	Up
GO:0032253	dense core granule localization	2/720	11/18866	0.0636724	0.190693	0.139039	MAP2/SYBU	2	geneontology_Biological_Process	0.00277778	Up
GO:0032306	regulation of prostaglandin secretion	2/720	11/18866	0.0636724	0.190693	0.139039	IL1B/TNFRSF11A	2	geneontology_Biological_Process	0.00277778	Up
GO:0032908	regulation of transforming growth factor beta1 production	2/720	11/18866	0.0636724	0.190693	0.139039	CX3CL1/TYROBP	2	geneontology_Biological_Process	0.00277778	Up
GO:0034372	very-low-density lipoprotein particle remodeling	2/720	11/18866	0.0636724	0.190693	0.139039	APOE/APOC2	2	geneontology_Biological_Process	0.00277778	Up
GO:0034378	chylomicron assembly	2/720	11/18866	0.0636724	0.190693	0.139039	APOE/APOC2	2	geneontology_Biological_Process	0.00277778	Up
GO:0042482	positive regulation of odontogenesis	2/720	11/18866	0.0636724	0.190693	0.139039	CSF1/CD34	2	geneontology_Biological_Process	0.00277778	Up
GO:0043619	regulation of transcription from RNA polymerase II promoter in response to oxidative stress	2/720	11/18866	0.0636724	0.190693	0.139039	HMOX1/EPAS1	2	geneontology_Biological_Process	0.00277778	Up
GO:0048680	positive regulation of axon regeneration	2/720	11/18866	0.0636724	0.190693	0.139039	SCARF1/GRN	2	geneontology_Biological_Process	0.00277778	Up
GO:0051006	positive regulation of lipoprotein lipase activity	2/720	11/18866	0.0636724	0.190693	0.139039	GPIHBP1/APOC2	2	geneontology_Biological_Process	0.00277778	Up
GO:0051610	serotonin uptake	2/720	11/18866	0.0636724	0.190693	0.139039	SNCA/ITGB3	2	geneontology_Biological_Process	0.00277778	Up
GO:0051673	membrane disruption in other organism	2/720	11/18866	0.0636724	0.190693	0.139039	MPEG1/GSDMD	2	geneontology_Biological_Process	0.00277778	Up
GO:0051712	positive regulation of killing of cells of other organism	2/720	11/18866	0.0636724	0.190693	0.139039	CLEC7A/PRF1	2	geneontology_Biological_Process	0.00277778	Up
GO:0060368	regulation of Fc receptor mediated stimulatory signaling pathway	2/720	11/18866	0.0636724	0.190693	0.139039	PTPRC/PTPRJ	2	geneontology_Biological_Process	0.00277778	Up
GO:0070213	protein auto-ADP-ribosylation	2/720	11/18866	0.0636724	0.190693	0.139039	PARP3/PARP10	2	geneontology_Biological_Process	0.00277778	Up
GO:0070254	mucus secretion	2/720	11/18866	0.0636724	0.190693	0.139039	VAMP8/CYBA	2	geneontology_Biological_Process	0.00277778	Up
GO:0071281	cellular response to iron ion	2/720	11/18866	0.0636724	0.190693	0.139039	HMOX1/SLC40A1	2	geneontology_Biological_Process	0.00277778	Up
GO:0090557	establishment of endothelial intestinal barrier	2/720	11/18866	0.0636724	0.190693	0.139039	F11R/ICAM1	2	geneontology_Biological_Process	0.00277778	Up
GO:0099519	dense core granule cytoskeletal transport	2/720	11/18866	0.0636724	0.190693	0.139039	MAP2/SYBU	2	geneontology_Biological_Process	0.00277778	Up
GO:0140052	cellular response to oxidised low-density lipoprotein particle stimulus	2/720	11/18866	0.0636724	0.190693	0.139039	TLR4/CD68	2	geneontology_Biological_Process	0.00277778	Up
GO:1901950	dense core granule transport	2/720	11/18866	0.0636724	0.190693	0.139039	MAP2/SYBU	2	geneontology_Biological_Process	0.00277778	Up
GO:1902474	positive regulation of protein localization to synapse	2/720	11/18866	0.0636724	0.190693	0.139039	TYROBP/CLSTN3	2	geneontology_Biological_Process	0.00277778	Up
GO:1903980	positive regulation of microglial cell activation	2/720	11/18866	0.0636724	0.190693	0.139039	TREM2/CCL3	2	geneontology_Biological_Process	0.00277778	Up
GO:2000035	regulation of stem cell division	2/720	11/18866	0.0636724	0.190693	0.139039	SOX17/EVI2B	2	geneontology_Biological_Process	0.00277778	Up
GO:2000318	positive regulation of T-helper 17 type immune response	2/720	11/18866	0.0636724	0.190693	0.139039	NLRP3/NFKBID	2	geneontology_Biological_Process	0.00277778	Up
GO:2001138	regulation of phospholipid transport	2/720	11/18866	0.0636724	0.190693	0.139039	PRKCD/APOE	2	geneontology_Biological_Process	0.00277778	Up
GO:2001140	positive regulation of phospholipid transport	2/720	11/18866	0.0636724	0.190693	0.139039	PRKCD/APOE	2	geneontology_Biological_Process	0.00277778	Up
GO:0043403	skeletal muscle tissue regeneration	4/720	40/18866	0.0650982	0.194098	0.141522	CFLAR/TGFBR2/CAPN3/GPX1	4	geneontology_Biological_Process	0.00555556	Up
GO:0048713	regulation of oligodendrocyte differentiation	4/720	40/18866	0.0650982	0.194098	0.141522	TNFRSF1B/TLR2/SLC45A3/MDK	4	geneontology_Biological_Process	0.00555556	Up
GO:0050691	regulation of defense response to virus by host	4/720	40/18866	0.0650982	0.194098	0.141522	PYCARD/LILRB1/IL1B/PTPN22	4	geneontology_Biological_Process	0.00555556	Up
GO:0072210	metanephric nephron development	4/720	40/18866	0.0650982	0.194098	0.141522	PDGFB/CD34/LIF/EGR1	4	geneontology_Biological_Process	0.00555556	Up
GO:0140353	lipid export from cell	4/720	40/18866	0.0650982	0.194098	0.141522	IL1B/TNFRSF11A/SPP1/AGT	4	geneontology_Biological_Process	0.00555556	Up
GO:1902895	positive regulation of pri-miRNA transcription by RNA polymerase II	4/720	40/18866	0.0650982	0.194098	0.141522	SPI1/PDGFB/FOS/EGR1	4	geneontology_Biological_Process	0.00555556	Up
GO:1903427	negative regulation of reactive oxygen species biosynthetic process	4/720	40/18866	0.0650982	0.194098	0.141522	SIRPA/CFLAR/CD34/ACP5	4	geneontology_Biological_Process	0.00555556	Up
GO:0050806	positive regulation of synaptic transmission	11/720	172/18866	0.0657442	0.1959	0.142836	CCR2/LILRB2/PTK2B/ARRB2/TYROBP/SHANK3/CLSTN3/CCL2/APOE/CX3CR1/SHANK1	11	geneontology_Biological_Process	0.0152778	Up
GO:0001541	ovarian follicle development	5/720	57/18866	0.06579	0.195913	0.142845	ARRB2/ICAM1/MMP19/LFNG/PTX3	5	geneontology_Biological_Process	0.00694444	Up
GO:0048844	artery morphogenesis	6/720	75/18866	0.0664795	0.197716	0.144159	ACVRL1/ENG/GJA5/APOE/JAG1/MDK	6	geneontology_Biological_Process	0.00833333	Up
GO:0050805	negative regulation of synaptic transmission	6/720	75/18866	0.0664795	0.197716	0.144159	LILRB2/PTK2B/IL1B/SHANK3/PLA2G6/SNCA	6	geneontology_Biological_Process	0.00833333	Up
GO:1901264	carbohydrate derivative transport	7/720	94/18866	0.0679031	0.201742	0.147095	ABCG1/VAMP8/NPC2/PSAP/SLC37A2/CYBA/PLTP	7	geneontology_Biological_Process	0.00972222	Up
GO:0006633	fatty acid biosynthetic process	11/720	173/18866	0.0679192	0.201742	0.147095	ALOX5/CD74/PTGS1/HPGDS/ALOX5AP/LTC4S/IL1B/SLC45A3/APOC1/GSTM2/APOC2	11	geneontology_Biological_Process	0.0152778	Up
GO:0034162	toll-like receptor 9 signaling pathway	3/720	25/18866	0.0683112	0.202014	0.147293	PIK3AP1/HAVCR2/PTPN22	3	geneontology_Biological_Process	0.00416667	Up
GO:0050927	positive regulation of positive chemotaxis	3/720	25/18866	0.0683112	0.202014	0.147293	S1PR1/CXCL12/F3	3	geneontology_Biological_Process	0.00416667	Up
GO:0051894	positive regulation of focal adhesion assembly	3/720	25/18866	0.0683112	0.202014	0.147293	PTPRJ/TEK/COL16A1	3	geneontology_Biological_Process	0.00416667	Up
GO:0060669	embryonic placenta morphogenesis	3/720	25/18866	0.0683112	0.202014	0.147293	SPINT2/ST14/SOCS3	3	geneontology_Biological_Process	0.00416667	Up
GO:1904385	cellular response to angiotensin	3/720	25/18866	0.0683112	0.202014	0.147293	PRKCD/CYBA/AGT	3	geneontology_Biological_Process	0.00416667	Up
GO:1905809	negative regulation of synapse organization	3/720	25/18866	0.0683112	0.202014	0.147293	LILRB2/TLR2/ARHGEF15	3	geneontology_Biological_Process	0.00416667	Up
GO:2000311	regulation of AMPA receptor activity	3/720	25/18866	0.0683112	0.202014	0.147293	SHANK3/MINK1/SHANK1	3	geneontology_Biological_Process	0.00416667	Up
GO:0010656	negative regulation of muscle cell apoptotic process	5/720	58/18866	0.0698476	0.206298	0.150417	PTK2B/ARRB2/CFLAR/HMOX1/MDK	5	geneontology_Biological_Process	0.00694444	Up
GO:0030042	actin filament depolymerization	5/720	58/18866	0.0698476	0.206298	0.150417	PLEK/TRIOBP/CAPG/SH3BP1/SCIN	5	geneontology_Biological_Process	0.00694444	Up
GO:0006040	amino sugar metabolic process	4/720	41/18866	0.0700575	0.206529	0.150585	ST6GAL1/NPL/RENBP/CHST1	4	geneontology_Biological_Process	0.00555556	Up
GO:0007212	dopamine receptor signaling pathway	4/720	41/18866	0.0700575	0.206529	0.150585	ARRB2/SULT1A4/GNA15/GNG2	4	geneontology_Biological_Process	0.00555556	Up
GO:0046825	regulation of protein export from nucleus	4/720	41/18866	0.0700575	0.206529	0.150585	IL1B/GAS6/RAPGEF3/IFI27	4	geneontology_Biological_Process	0.00555556	Up
GO:0015718	monocarboxylic acid transport	11/720	174/18866	0.07014	0.206643	0.150668	SLCO2B1/IL1B/SLCO2A1/ACSL5/PLA2G6/TNFRSF11A/ABCC3/APOE/SLC16A5/EMB/PLA2G5	11	geneontology_Biological_Process	0.0152778	Up
GO:0051098	regulation of binding	20/720	367/18866	0.0708269	0.208536	0.152049	MFNG/TMC8/PRKCD/ARRB2/PLXND1/DAB2/PDGFB/HMOX1/APOE/HOXA3/RAMP2/ATP2A3/CTSZ/LFNG/LIF/MAP2/SLPI/CLDN5/LDOC1/GZMA	20	geneontology_Biological_Process	0.0277778	Up
GO:0007219	Notch signaling pathway	12/720	195/18866	0.0709232	0.208582	0.152082	MFNG/EGFL7/ARRDC1/PLXND1/NOTCH4/CEBPA/GDPD5/JAG1/TCIM/TGFBR2/LFNG/MDK	12	geneontology_Biological_Process	0.0166667	Up
GO:0003073	regulation of systemic arterial blood pressure	7/720	95/18866	0.0710197	0.208582	0.152082	GAS6/CPA3/PDGFB/GJA5/CYBA/CTSZ/AGT	7	geneontology_Biological_Process	0.00972222	Up
GO:0050709	negative regulation of protein secretion	7/720	95/18866	0.0710197	0.208582	0.152082	CD22/FCGR2B/IL1B/RHBDF1/APOE/SRGN/CD200	7	geneontology_Biological_Process	0.00972222	Up
GO:0051668	localization within membrane	7/720	95/18866	0.0710197	0.208582	0.152082	DOCK2/ITGB2/CD2/ITGAL/PTPRC/SHANK3/APOE	7	geneontology_Biological_Process	0.00972222	Up
GO:0050890	cognition	17/720	302/18866	0.071968	0.211235	0.154016	LILRB2/HLA-DRA/SHANK3/TLR2/PLA2G6/C5AR1/SGK1/ZNF385A/APOE/SLC12A5/CX3CR1/NDRG4/CLDN5/MDK/FOS/SHANK1/AGT	17	geneontology_Biological_Process	0.0236111	Up
GO:0071897	DNA biosynthetic process	12/720	196/18866	0.0730711	0.214059	0.156075	PARP3/PTK2B/POLD4/ARRB2/PARP10/ACVRL1/PDGFB/UBE2L6/PKIB/CCN2/HGF/SMOC2	12	geneontology_Biological_Process	0.0166667	Up
GO:0002200	somatic diversification of immune receptors	6/720	77/18866	0.0735624	0.214059	0.156075	TNFSF13/PARP3/PTPRC/SAMHD1/CD40/BATF	6	geneontology_Biological_Process	0.00833333	Up
GO:0060411	cardiac septum morphogenesis	6/720	77/18866	0.0735624	0.214059	0.156075	ENG/GJA5/JAG1/TGFBR2/SLIT2/DHRS3	6	geneontology_Biological_Process	0.00833333	Up
GO:0019731	antibacterial humoral response	5/720	59/18866	0.07404	0.214059	0.156075	HLA-E/RNASE6/PLA2G6/JCHAIN/SLPI	5	geneontology_Biological_Process	0.00694444	Up
GO:0043525	positive regulation of neuron apoptotic process	5/720	59/18866	0.07404	0.214059	0.156075	ITGAM/TYROBP/GRN/CTSZ/CCL3	5	geneontology_Biological_Process	0.00694444	Up
GO:0007611	learning or memory	15/720	260/18866	0.0740927	0.214059	0.156075	LILRB2/SHANK3/TLR2/PLA2G6/SGK1/ZNF385A/APOE/SLC12A5/CX3CR1/NDRG4/CLDN5/MDK/FOS/SHANK1/AGT	15	geneontology_Biological_Process	0.0208333	Up
GO:0035249	synaptic transmission, glutamatergic	7/720	96/18866	0.0742201	0.214059	0.156075	CCR2/PTK2B/SHANK3/PLA2G6/CLSTN3/CCL2/SHANK1	7	geneontology_Biological_Process	0.00972222	Up
GO:0001768	establishment of T cell polarity	2/720	12/18866	0.0745254	0.214059	0.156075	DOCK2/DOCK8	2	geneontology_Biological_Process	0.00277778	Up
GO:0001821	histamine secretion	2/720	12/18866	0.0745254	0.214059	0.156075	BTK/VAMP8	2	geneontology_Biological_Process	0.00277778	Up
GO:0001867	complement activation, lectin pathway	2/720	12/18866	0.0745254	0.214059	0.156075	FCN1/SERPING1	2	geneontology_Biological_Process	0.00277778	Up
GO:0002002	regulation of angiotensin levels in blood	2/720	12/18866	0.0745254	0.214059	0.156075	CPA3/CTSZ	2	geneontology_Biological_Process	0.00277778	Up
GO:0002003	angiotensin maturation	2/720	12/18866	0.0745254	0.214059	0.156075	CPA3/CTSZ	2	geneontology_Biological_Process	0.00277778	Up
GO:0008298	intracellular mRNA localization	2/720	12/18866	0.0745254	0.214059	0.156075	ZNF385A/ZFP36	2	geneontology_Biological_Process	0.00277778	Up
GO:0009071	serine family amino acid catabolic process	2/720	12/18866	0.0745254	0.214059	0.156075	CSAD/SDS	2	geneontology_Biological_Process	0.00277778	Up
GO:0010755	regulation of plasminogen activation	2/720	12/18866	0.0745254	0.214059	0.156075	CLEC3B/CTSZ	2	geneontology_Biological_Process	0.00277778	Up
GO:0014831	gastro-intestinal system smooth muscle contraction	2/720	12/18866	0.0745254	0.214059	0.156075	PTAFR/SULF1	2	geneontology_Biological_Process	0.00277778	Up
GO:0031392	regulation of prostaglandin biosynthetic process	2/720	12/18866	0.0745254	0.214059	0.156075	CD74/IL1B	2	geneontology_Biological_Process	0.00277778	Up
GO:0042118	endothelial cell activation	2/720	12/18866	0.0745254	0.214059	0.156075	CXCL10/TCIM	2	geneontology_Biological_Process	0.00277778	Up
GO:0042178	xenobiotic catabolic process	2/720	12/18866	0.0745254	0.214059	0.156075	PON3/GSTM2	2	geneontology_Biological_Process	0.00277778	Up
GO:0042492	gamma-delta T cell differentiation	2/720	12/18866	0.0745254	0.214059	0.156075	NCKAP1L/PTPRC	2	geneontology_Biological_Process	0.00277778	Up
GO:0043696	dedifferentiation	2/720	12/18866	0.0745254	0.214059	0.156075	PDGFB/OLFM2	2	geneontology_Biological_Process	0.00277778	Up
GO:0043697	cell dedifferentiation	2/720	12/18866	0.0745254	0.214059	0.156075	PDGFB/OLFM2	2	geneontology_Biological_Process	0.00277778	Up
GO:0061365	positive regulation of triglyceride lipase activity	2/720	12/18866	0.0745254	0.214059	0.156075	GPIHBP1/APOC2	2	geneontology_Biological_Process	0.00277778	Up
GO:0070269	pyroptosis	2/720	12/18866	0.0745254	0.214059	0.156075	NAIP/GSDMD	2	geneontology_Biological_Process	0.00277778	Up
GO:0070493	thrombin-activated receptor signaling pathway	2/720	12/18866	0.0745254	0.214059	0.156075	PLEK/SNCA	2	geneontology_Biological_Process	0.00277778	Up
GO:0072015	glomerular visceral epithelial cell development	2/720	12/18866	0.0745254	0.214059	0.156075	JAG1/PODXL	2	geneontology_Biological_Process	0.00277778	Up
GO:0072537	fibroblast activation	2/720	12/18866	0.0745254	0.214059	0.156075	IL17RA/CYGB	2	geneontology_Biological_Process	0.00277778	Up
GO:0090154	positive regulation of sphingolipid biosynthetic process	2/720	12/18866	0.0745254	0.214059	0.156075	PRKCD/PLA2G6	2	geneontology_Biological_Process	0.00277778	Up
GO:0090331	negative regulation of platelet aggregation	2/720	12/18866	0.0745254	0.214059	0.156075	PRKCD/SH2B3	2	geneontology_Biological_Process	0.00277778	Up
GO:1901503	ether biosynthetic process	2/720	12/18866	0.0745254	0.214059	0.156075	ALOX5/PLA2G5	2	geneontology_Biological_Process	0.00277778	Up
GO:1902950	regulation of dendritic spine maintenance	2/720	12/18866	0.0745254	0.214059	0.156075	FCGR2B/APOE	2	geneontology_Biological_Process	0.00277778	Up
GO:1905522	negative regulation of macrophage migration	2/720	12/18866	0.0745254	0.214059	0.156075	SLAMF8/CD200	2	geneontology_Biological_Process	0.00277778	Up
GO:2000304	positive regulation of ceramide biosynthetic process	2/720	12/18866	0.0745254	0.214059	0.156075	PRKCD/PLA2G6	2	geneontology_Biological_Process	0.00277778	Up
GO:2001214	positive regulation of vasculogenesis	2/720	12/18866	0.0745254	0.214059	0.156075	CD34/RAMP2	2	geneontology_Biological_Process	0.00277778	Up
GO:0018904	ether metabolic process	3/720	26/18866	0.0751192	0.214059	0.156075	ALOX5/PLA2G6/PLA2G5	3	geneontology_Biological_Process	0.00416667	Up
GO:0031579	membrane raft organization	3/720	26/18866	0.0751192	0.214059	0.156075	DOCK2/CD2/PTPRC	3	geneontology_Biological_Process	0.00416667	Up
GO:0032967	positive regulation of collagen biosynthetic process	3/720	26/18866	0.0751192	0.214059	0.156075	ARRB2/ENG/CCN2	3	geneontology_Biological_Process	0.00416667	Up
GO:0036152	phosphatidylethanolamine acyl-chain remodeling	3/720	26/18866	0.0751192	0.214059	0.156075	PLA2G6/PLAAT4/PLA2G5	3	geneontology_Biological_Process	0.00416667	Up
GO:0042730	fibrinolysis	3/720	26/18866	0.0751192	0.214059	0.156075	SERPING1/THBD/PLAT	3	geneontology_Biological_Process	0.00416667	Up
GO:0050926	regulation of positive chemotaxis	3/720	26/18866	0.0751192	0.214059	0.156075	S1PR1/CXCL12/F3	3	geneontology_Biological_Process	0.00416667	Up
GO:0051016	barbed-end actin filament capping	3/720	26/18866	0.0751192	0.214059	0.156075	TRIOBP/CAPG/SCIN	3	geneontology_Biological_Process	0.00416667	Up
GO:0060343	trabecula formation	3/720	26/18866	0.0751192	0.214059	0.156075	TEK/SLC40A1/CHAD	3	geneontology_Biological_Process	0.00416667	Up
GO:0060765	regulation of androgen receptor signaling pathway	3/720	26/18866	0.0751192	0.214059	0.156075	ARRB2/DAB2/KDM5D	3	geneontology_Biological_Process	0.00416667	Up
GO:0072202	cell differentiation involved in metanephros development	3/720	26/18866	0.0751192	0.214059	0.156075	PDGFB/CD34/LIF	3	geneontology_Biological_Process	0.00416667	Up
GO:1904861	excitatory synapse assembly	3/720	26/18866	0.0751192	0.214059	0.156075	SEMA4A/SHANK3/SHANK1	3	geneontology_Biological_Process	0.00416667	Up
GO:0006509	membrane protein ectodomain proteolysis	4/720	42/18866	0.0752049	0.214059	0.156075	TNFRSF1B/IL1B/ADAM8/APOE	4	geneontology_Biological_Process	0.00555556	Up
GO:0046006	regulation of activated T cell proliferation	4/720	42/18866	0.0752049	0.214059	0.156075	RIPK3/PYCARD/IL18/LGALS9	4	geneontology_Biological_Process	0.00555556	Up
GO:0098760	response to interleukin-7	4/720	42/18866	0.0752049	0.214059	0.156075	BTK/STAT5A/JAK3/IL2RG	4	geneontology_Biological_Process	0.00555556	Up
GO:0098761	cellular response to interleukin-7	4/720	42/18866	0.0752049	0.214059	0.156075	BTK/STAT5A/JAK3/IL2RG	4	geneontology_Biological_Process	0.00555556	Up
GO:1901658	glycosyl compound catabolic process	4/720	42/18866	0.0752049	0.214059	0.156075	ADA2/FUCA1/TYMP/DPYD	4	geneontology_Biological_Process	0.00555556	Up
GO:0007409	axonogenesis	25/720	482/18866	0.0754019	0.21449	0.15639	ARHGAP4/DOK2/CSF1R/SEMA4A/PLXND1/SHANK3/SEMA3G/PTPRM/RAC2/ROBO4/TRPV2/APOE/SCN1B/SLIT2/CXCL12/EXT1/PDLIM7/EMB/SHTN1/SEMA7A/SPP1/SEMA4B/BOC/MAP2/SEMA6D	25	geneontology_Biological_Process	0.0347222	Up
GO:0001890	placenta development	10/720	156/18866	0.0759407	0.215892	0.157412	SPINT2/PDGFB/VASH1/CEBPA/ST14/EPAS1/SPP1/SOCS3/LIF/LDOC1	10	geneontology_Biological_Process	0.0138889	Up
GO:0050803	regulation of synapse structure or activity	14/720	240/18866	0.0768298	0.218287	0.159159	IL10RA/LILRB2/FCGR2B/SEMA4A/SHANK3/TLR2/SNCA/CLSTN3/ARHGEF15/APOE/AMIGO2/SRGN/MX1/SYBU	14	geneontology_Biological_Process	0.0194444	Up
GO:0050688	regulation of defense response to virus	6/720	78/18866	0.0772592	0.219375	0.159952	FGL2/PYCARD/LILRB1/DHX58/IL1B/PTPN22	6	geneontology_Biological_Process	0.00833333	Up
GO:0007626	locomotory behavior	12/720	198/18866	0.0774912	0.219806	0.160265	ARRB2/HPGDS/ZNF385A/SELENOP/PSAP/APOE/GAA/CXCL12/ANKH/SNCG/EGR1/OLFM2	12	geneontology_Biological_Process	0.0166667	Up
GO:1901184	regulation of ERBB signaling pathway	7/720	97/18866	0.0775042	0.219806	0.160265	NCF1/PTPN18/PTPRJ/RHBDF1/MVP/IFI6/AGT	7	geneontology_Biological_Process	0.00972222	Up
GO:0010639	negative regulation of organelle organization	22/720	416/18866	0.0776812	0.220175	0.160535	WAS/CORO1A/LILRB2/PRKCD/ARRB2/TRIOBP/SPI1/SHANK3/CAPG/SNCA/KANK3/F11R/GMFG/S1PR1/CDH5/SLIT2/GPX1/LIF/MAP2/HGF/SHANK1/SCIN	22	geneontology_Biological_Process	0.0305556	Up
GO:1902883	negative regulation of response to oxidative stress	5/720	60/18866	0.0783663	0.221983	0.161853	GGT7/MCTP1/PSAP/GPX1/HGF	5	geneontology_Biological_Process	0.00694444	Up
GO:0010770	positive regulation of cell morphogenesis involved in differentiation	10/720	157/18866	0.0784907	0.222201	0.162012	TRIOBP/PLXND1/UNC13D/TRPV2/SLIT2/CXCL12/SHTN1/SEMA7A/NEDD9/MDK	10	geneontology_Biological_Process	0.0138889	Up
GO:0042552	myelination	9/720	137/18866	0.079281	0.224304	0.163545	ITGAX/TNFRSF1B/TLR2/MALL/TYMP/PSAP/EPB41L3/CST7/HGF	9	geneontology_Biological_Process	0.0125	Up
GO:0045773	positive regulation of axon extension	4/720	43/18866	0.0805373	0.227584	0.165937	TRPV2/CXCL12/SHTN1/SEMA7A	4	geneontology_Biological_Process	0.00555556	Up
GO:2000648	positive regulation of stem cell proliferation	4/720	43/18866	0.0805373	0.227584	0.165937	CX3CL1/PTPRC/CX3CR1/LTBP3	4	geneontology_Biological_Process	0.00555556	Up
GO:0070373	negative regulation of ERK1 and ERK2 cascade	6/720	79/18866	0.0810592	0.228784	0.166812	TBC1D10C/TLR4/PTPRC/SIRPA/LIF/GBP1	6	geneontology_Biological_Process	0.00833333	Up
GO:0099601	regulation of neurotransmitter receptor activity	6/720	79/18866	0.0810592	0.228784	0.166812	CCR2/PTK2B/SHANK3/MINK1/CCL2/SHANK1	6	geneontology_Biological_Process	0.00833333	Up
GO:0006631	fatty acid metabolic process	21/720	396/18866	0.0814473	0.229742	0.16751	ALOX5/CD74/PTGS1/HPGDS/ALOX5AP/LTC4S/IL1B/ACSL5/AOAH/PON2/PON3/SLC45A3/C3/GGT5/GPX1/APOC1/PLA2G5/CYGB/GSTM2/GPAT2/APOC2	21	geneontology_Biological_Process	0.0291667	Up
GO:0048469	cell maturation	11/720	179/18866	0.0819376	0.230659	0.168179	BTK/C1QA/CLEC7A/CX3CL1/PTK2B/SCARF1/CEBPA/RHEX/POU2F2/C3/EPAS1	11	geneontology_Biological_Process	0.0152778	Up
GO:0031032	actomyosin structure organization	12/720	200/18866	0.0820779	0.230659	0.168179	WAS/PTK2B/CFLAR/ZYX/RAPGEF3/F11R/ARHGEF15/S1PR1/MYH11/CAPN3/EPB41L3/CCN2	12	geneontology_Biological_Process	0.0166667	Up
GO:0007569	cell aging	8/720	118/18866	0.0822026	0.230659	0.168179	PRKCD/ENG/VASH1/ICAM1/ECRG4/BGLAP/MAGEA2/MAGEA2B	8	geneontology_Biological_Process	0.0111111	Up
GO:0006817	phosphate ion transport	3/720	27/18866	0.0822138	0.230659	0.168179	SLC37A2/ANKH/SFRP4	3	geneontology_Biological_Process	0.00416667	Up
GO:0010996	response to auditory stimulus	3/720	27/18866	0.0822138	0.230659	0.168179	SHANK3/CXCL10/MDK	3	geneontology_Biological_Process	0.00416667	Up
GO:0033081	regulation of T cell differentiation in thymus	3/720	27/18866	0.0822138	0.230659	0.168179	IL1B/NFKBID/ADAM8	3	geneontology_Biological_Process	0.00416667	Up
GO:0050996	positive regulation of lipid catabolic process	3/720	27/18866	0.0822138	0.230659	0.168179	PRKCD/IL1B/APOC2	3	geneontology_Biological_Process	0.00416667	Up
GO:0072539	T-helper 17 cell differentiation	3/720	27/18866	0.0822138	0.230659	0.168179	NLRP3/NFKBID/BATF	3	geneontology_Biological_Process	0.00416667	Up
GO:1900120	regulation of receptor binding	3/720	27/18866	0.0822138	0.230659	0.168179	HOXA3/ATP2A3/LDOC1	3	geneontology_Biological_Process	0.00416667	Up
GO:0003170	heart valve development	5/720	61/18866	0.0828255	0.232099	0.169229	TNFRSF1B/GJA5/JAG1/TGFBR2/SLIT2	5	geneontology_Biological_Process	0.00694444	Up
GO:1903902	positive regulation of viral life cycle	5/720	61/18866	0.0828255	0.232099	0.169229	HLA-DRB1/CD74/CD4/LGALS9/CCL5	5	geneontology_Biological_Process	0.00694444	Up
GO:0032388	positive regulation of intracellular transport	13/720	222/18866	0.0839246	0.235039	0.171372	ITGAM/HCLS1/PRKCD/EDEM2/ITGB2/IL1B/GAS6/HYAL2/MICALL2/DAB2/RAPGEF3/RAC2/MAP2	13	geneontology_Biological_Process	0.0180556	Up
GO:0043255	regulation of carbohydrate biosynthetic process	7/720	99/18866	0.0843229	0.236014	0.172083	PLEK/P2RY6/PTAFR/PTK2B/PDGFB/SNCA/PPP1R3F	7	geneontology_Biological_Process	0.00972222	Up
GO:0060562	epithelial tube morphogenesis	18/720	331/18866	0.0844641	0.236077	0.17213	CSF1R/SOX17/ITGAX/PLXND1/ACVRL1/CSF1/SPINT2/ENG/NOTCH4/ST14/CXCL10/TGFBR2/SLIT2/PODXL/NDRG4/CTSZ/MDK/AGT	18	geneontology_Biological_Process	0.025	Up
GO:0009988	cell-cell recognition	6/720	80/18866	0.0849617	0.236077	0.17213	DOCK2/CD209/DOCK8/FOLR2/HAVCR2/PRF1	6	geneontology_Biological_Process	0.00833333	Up
GO:0014032	neural crest cell development	6/720	80/18866	0.0849617	0.236077	0.17213	SEMA4A/SEMA3G/JAG1/SEMA7A/SEMA4B/SEMA6D	6	geneontology_Biological_Process	0.00833333	Up
GO:0048678	response to axon injury	6/720	80/18866	0.0849617	0.236077	0.17213	AIF1/TYROBP/SCARF1/CST3/GRN/SPP1	6	geneontology_Biological_Process	0.00833333	Up
GO:0007272	ensheathment of neurons	9/720	139/18866	0.0849908	0.236077	0.17213	ITGAX/TNFRSF1B/TLR2/MALL/TYMP/PSAP/EPB41L3/CST7/HGF	9	geneontology_Biological_Process	0.0125	Up
GO:0008366	axon ensheathment	9/720	139/18866	0.0849908	0.236077	0.17213	ITGAX/TNFRSF1B/TLR2/MALL/TYMP/PSAP/EPB41L3/CST7/HGF	9	geneontology_Biological_Process	0.0125	Up
GO:0001767	establishment of lymphocyte polarity	2/720	13/18866	0.0859141	0.236077	0.17213	DOCK2/DOCK8	2	geneontology_Biological_Process	0.00277778	Up
GO:0002674	negative regulation of acute inflammatory response	2/720	13/18866	0.0859141	0.236077	0.17213	NLRP3/FCGR2B	2	geneontology_Biological_Process	0.00277778	Up
GO:0006012	galactose metabolic process	2/720	13/18866	0.0859141	0.236077	0.17213	GALT/CHST1	2	geneontology_Biological_Process	0.00277778	Up
GO:0010745	negative regulation of macrophage derived foam cell differentiation	2/720	13/18866	0.0859141	0.236077	0.17213	ABCG1/ITGB3	2	geneontology_Biological_Process	0.00277778	Up
GO:0010958	regulation of amino acid import across plasma membrane	2/720	13/18866	0.0859141	0.236077	0.17213	SLC43A2/AGT	2	geneontology_Biological_Process	0.00277778	Up
GO:0015809	arginine transport	2/720	13/18866	0.0859141	0.236077	0.17213	SLC11A1/AGT	2	geneontology_Biological_Process	0.00277778	Up
GO:0019336	phenol-containing compound catabolic process	2/720	13/18866	0.0859141	0.236077	0.17213	SULT1A4/MAOB	2	geneontology_Biological_Process	0.00277778	Up
GO:0030205	dermatan sulfate metabolic process	2/720	13/18866	0.0859141	0.236077	0.17213	IDUA/VCAN	2	geneontology_Biological_Process	0.00277778	Up
GO:0031650	regulation of heat generation	2/720	13/18866	0.0859141	0.236077	0.17213	IL1B/TNFRSF11A	2	geneontology_Biological_Process	0.00277778	Up
GO:0031665	negative regulation of lipopolysaccharide-mediated signaling pathway	2/720	13/18866	0.0859141	0.236077	0.17213	SIGIRR/LILRA2	2	geneontology_Biological_Process	0.00277778	Up
GO:0032725	positive regulation of granulocyte macrophage colony-stimulating factor production	2/720	13/18866	0.0859141	0.236077	0.17213	IL18/IL1B	2	geneontology_Biological_Process	0.00277778	Up
GO:0033089	positive regulation of T cell differentiation in thymus	2/720	13/18866	0.0859141	0.236077	0.17213	IL1B/ADAM8	2	geneontology_Biological_Process	0.00277778	Up
GO:0046348	amino sugar catabolic process	2/720	13/18866	0.0859141	0.236077	0.17213	NPL/RENBP	2	geneontology_Biological_Process	0.00277778	Up
GO:0048266	behavioral response to pain	2/720	13/18866	0.0859141	0.236077	0.17213	LPAR5/VWA1	2	geneontology_Biological_Process	0.00277778	Up
GO:0048302	regulation of isotype switching to IgG isotypes	2/720	13/18866	0.0859141	0.236077	0.17213	PTPRC/CD40	2	geneontology_Biological_Process	0.00277778	Up
GO:0060340	positive regulation of type I interferon-mediated signaling pathway	2/720	13/18866	0.0859141	0.236077	0.17213	NLRC5/IRF7	2	geneontology_Biological_Process	0.00277778	Up
GO:0061043	regulation of vascular wound healing	2/720	13/18866	0.0859141	0.236077	0.17213	ALOX5/SMOC2	2	geneontology_Biological_Process	0.00277778	Up
GO:0072310	glomerular epithelial cell development	2/720	13/18866	0.0859141	0.236077	0.17213	JAG1/PODXL	2	geneontology_Biological_Process	0.00277778	Up
GO:0072578	neurotransmitter-gated ion channel clustering	2/720	13/18866	0.0859141	0.236077	0.17213	SHANK3/APOE	2	geneontology_Biological_Process	0.00277778	Up
GO:0090677	reversible differentiation	2/720	13/18866	0.0859141	0.236077	0.17213	PDGFB/OLFM2	2	geneontology_Biological_Process	0.00277778	Up
GO:0150105	protein localization to cell-cell junction	2/720	13/18866	0.0859141	0.236077	0.17213	F11R/CDH5	2	geneontology_Biological_Process	0.00277778	Up
GO:1903651	positive regulation of cytoplasmic transport	2/720	13/18866	0.0859141	0.236077	0.17213	DAB2/MAP2	2	geneontology_Biological_Process	0.00277778	Up
GO:1903789	regulation of amino acid transmembrane transport	2/720	13/18866	0.0859141	0.236077	0.17213	SLC43A2/AGT	2	geneontology_Biological_Process	0.00277778	Up
GO:2000052	positive regulation of non-canonical Wnt signaling pathway	2/720	13/18866	0.0859141	0.236077	0.17213	DAB2/PLEKHA4	2	geneontology_Biological_Process	0.00277778	Up
GO:0045687	positive regulation of glial cell differentiation	4/720	44/18866	0.0860516	0.236077	0.17213	TNFRSF1B/TLR2/LIF/MDK	4	geneontology_Biological_Process	0.00555556	Up
GO:0050654	chondroitin sulfate proteoglycan metabolic process	4/720	44/18866	0.0860516	0.236077	0.17213	IDUA/HYAL1/VCAN/EGFLAM	4	geneontology_Biological_Process	0.00555556	Up
GO:0120009	intermembrane lipid transfer	4/720	44/18866	0.0860516	0.236077	0.17213	ABCG1/NPC2/APOE/PLTP	4	geneontology_Biological_Process	0.00555556	Up
GO:1903053	regulation of extracellular matrix organization	4/720	44/18866	0.0860516	0.236077	0.17213	TNFRSF1B/CFLAR/CST3/AGT	4	geneontology_Biological_Process	0.00555556	Up
GO:1905330	regulation of morphogenesis of an epithelium	11/720	181/18866	0.086982	0.238491	0.173889	ARRB2/ITGAX/DAB2/CXCL10/PSMB9/SULF1/PLEKHA4/LIF/MDK/HGF/AGT	11	geneontology_Biological_Process	0.0152778	Up
GO:0032233	positive regulation of actin filament bundle assembly	5/720	62/18866	0.0874161	0.239541	0.174655	PLEK/CX3CL1/RAPGEF3/ARHGEF15/CCN2	5	geneontology_Biological_Process	0.00694444	Up
[truncated: 1,350 more rows]
